# Supplementary material for: Discovery of a heparan sulfate binding domain in monkeypox virus H3 as an anti-poxviral drug target combining AI and MD simulations
Source: eLife. 2025 Jan 16;13:RP100545. doi: 10.7554/eLife.100545 (PMC11737874; doi:10.7554/eLife.100545)
Supplement: Figure 2—source data 1. [file elife-100545-fig2-data1.xlsx]

## Sheet: Sheet1
motif1-dock 1-Time (ns)	motif1-dock 1-RMSD (nm)	motif1-dock 2-Time (ns)	motif1-dock 2-RMSD (nm)	motif1-dock 3-Time (ns)	motif1-dock 3-RMSD (nm)	motif1-dock 4-Time (ns)	motif1-dock 4-RMSD (nm)	motif2-dock 1-Time (ns)	motif2-dock 1-RMSD (nm)	motif2-dock 2-Time (ns)	motif2-dock 2-RMSD (nm)	motif2-dock 3-Time (ns)	motif2-dock 3-RMSD (nm)	motif2-dock 4-Time (ns)	motif2-dock 4-RMSD (nm)	motif3-dock 1-Time (ns)	motif3-dock 1-RMSD (nm)	motif3-dock 2-Time (ns)	motif3-dock 2-RMSD (nm)	motif3-dock 3-Time (ns)	motif3-dock 3-RMSD (nm)	motif3-dock 4-Time (ns)	motif3-dock 4-RMSD (nm)	helical_motif-dock 1-Time (ns)	helical_motif-dock 1-RMSD (nm)	helical_motif-dock 2-Time (ns)	helical_motif-dock 2-RMSD (nm)	helical_motif-dock 3-Time (ns)	helical_motif-dock 3-RMSD (nm)	helical_motif-dock 4-Time (ns)	helical_motif-dock 4-RMSD (nm)
0	5e-07	0	1e-06	0	5e-07	0	5e-07	0	4e-07	0	6e-07	0	5e-07	0	6e-07	0	5e-07	0	6e-07	0	6e-07	0	7e-07	0	6e-07	0	4e-07	0	5e-07	0	5e-07
100	0.25709	100	0.227654	100	0.225008	100	0.308681	100	0.232047	100	0.26037	100	0.243805	100	0.399791	100	0.463978	100	0.315443	100	0.272774	100	0.271463	100	0.37614	100	0.2869	100	0.305204	100	0.366107
200	0.313484	200	0.29094	200	0.248987	200	0.423934	200	0.271633	200	0.325805	200	0.282721	200	0.576491	200	0.611948	200	0.330875	200	0.274335	200	0.290893	200	0.529198	200	0.383521	200	0.354481	200	0.474238
300	0.330925	300	0.330823	300	0.321453	300	0.475835	300	0.284203	300	0.35958	300	0.344376	300	0.648804	300	0.650989	300	0.375235	300	0.291102	300	0.357649	300	0.625037	300	0.423408	300	0.440598	300	0.465838
400	0.347474	400	0.373459	400	0.350598	400	0.515476	400	0.308257	400	0.363221	400	0.396204	400	0.692571	400	0.749227	400	0.383736	400	0.319195	400	0.407619	400	0.661713	400	0.459467	400	0.453881	400	0.431136
500	0.37114	500	0.399141	500	0.386514	500	0.575173	500	0.345543	500	0.363741	500	0.467908	500	0.686787	500	0.793198	500	0.384029	500	0.311223	500	0.416008	500	0.734932	500	0.500928	500	0.528989	500	0.529942
600	0.376005	600	0.462542	600	0.384588	600	0.639678	600	0.362229	600	0.423526	600	0.510806	600	0.696547	600	0.845935	600	0.385491	600	0.326841	600	0.444228	600	0.828301	600	0.491415	600	0.553433	600	0.542315
700	0.428654	700	0.459772	700	0.402554	700	0.721841	700	0.408815	700	0.419958	700	0.477098	700	0.757278	700	0.852642	700	0.374177	700	0.350669	700	0.468867	700	0.786246	700	0.526219	700	0.662157	700	0.473458
800	0.462428	800	0.512907	800	0.45151	800	0.733312	800	0.369328	800	0.472961	800	0.580056	800	0.832381	800	0.913938	800	0.404468	800	0.382857	800	0.48628	800	0.849051	800	0.549965	800	0.639544	800	0.436181
900	0.484506	900	0.527006	900	0.49119	900	0.797549	900	0.406969	900	0.42059	900	0.576321	900	0.818385	900	0.855837	900	0.397623	900	0.370756	900	0.544682	900	0.825442	900	0.585525	900	0.637028	900	0.510513
1000	0.544083	1000	0.549459	1000	0.508304	1000	0.880381	1000	0.48399	1000	0.425419	1000	0.633597	1000	0.807798	1000	0.841897	1000	0.388892	1000	0.414935	1000	0.519477	1000	0.904945	1000	0.590142	1000	0.653779	1000	0.484461
1100	0.566244	1100	0.567311	1100	0.514999	1100	0.912941	1100	0.475482	1100	0.450224	1100	0.700519	1100	0.833497	1100	0.826411	1100	0.378211	1100	0.41471	1100	0.570861	1100	0.878089	1100	0.637652	1100	0.693597	1100	0.473199
1200	0.607772	1200	0.563947	1200	0.529069	1200	0.92701	1200	0.527395	1200	0.453082	1200	0.808934	1200	0.859308	1200	0.856806	1200	0.393827	1200	0.432654	1200	0.546427	1200	0.784383	1200	0.626951	1200	0.74135	1200	0.490134
1300	0.700698	1300	0.627436	1300	0.551927	1300	0.976812	1300	0.524675	1300	0.480188	1300	0.870446	1300	0.947643	1300	0.862594	1300	0.417281	1300	0.440741	1300	0.564493	1300	0.835019	1300	0.723984	1300	0.790364	1300	0.519711
1400	0.730894	1400	0.618236	1400	0.564725	1400	1.00632	1400	0.51824	1400	0.470061	1400	0.886679	1400	0.976872	1400	0.863352	1400	0.4287	1400	0.467375	1400	0.629195	1400	0.838203	1400	0.71236	1400	0.807899	1400	0.576153
1500	0.725892	1500	0.697165	1500	0.625072	1500	1.07813	1500	0.536783	1500	0.448381	1500	0.905533	1500	1.00224	1500	0.898332	1500	0.425669	1500	0.485867	1500	0.697707	1500	0.80245	1500	0.70949	1500	0.774302	1500	0.652327
1600	0.722443	1600	0.690536	1600	0.63393	1600	1.08487	1600	0.572306	1600	0.469831	1600	0.966329	1600	0.998238	1600	0.93122	1600	0.431736	1600	0.479749	1600	0.672814	1600	0.896748	1600	0.748906	1600	0.807901	1600	0.629668
1700	0.761418	1700	0.682076	1700	0.585281	1700	1.15402	1700	0.580481	1700	0.459019	1700	1.09885	1700	1.03959	1700	1.02477	1700	0.462376	1700	0.466531	1700	0.653639	1700	0.93727	1700	0.768951	1700	0.853917	1700	0.622336
1800	0.774026	1800	0.778049	1800	0.557994	1800	1.06912	1800	0.591065	1800	0.45924	1800	1.20274	1800	1.07241	1800	1.10782	1800	0.483103	1800	0.460603	1800	0.642838	1800	1.01907	1800	0.699456	1800	0.952728	1800	0.638439
1900	0.813265	1900	0.837582	1900	0.611295	1900	1.10106	1900	0.585166	1900	0.442286	1900	1.24022	1900	1.09451	1900	1.07654	1900	0.525938	1900	0.526216	1900	0.719574	1900	1.02317	1900	0.711824	1900	0.95965	1900	0.71997
2000	0.869954	2000	0.846293	2000	0.671464	2000	1.21437	2000	0.647613	2000	0.455925	2000	1.20272	2000	1.14134	2000	1.10768	2000	0.541365	2000	0.511372	2000	0.747031	2000	1.01731	2000	0.730874	2000	1.16132	2000	0.654172
2100	0.89098	2100	0.854767	2100	0.665414	2100	1.19933	2100	0.654695	2100	0.465859	2100	1.22176	2100	1.14333	2100	1.20119	2100	0.533797	2100	0.522326	2100	0.795613	2100	1.05306	2100	0.714936	2100	1.21062	2100	0.612038
2200	0.934687	2200	0.853182	2200	0.661632	2200	1.21917	2200	0.681846	2200	0.485141	2200	1.21828	2200	1.10625	2200	1.2751	2200	0.562221	2200	0.537512	2200	0.821285	2200	1.18208	2200	0.728393	2200	1.23034	2200	0.61278
2300	0.932233	2300	0.862864	2300	0.680508	2300	1.21522	2300	0.781702	2300	0.453741	2300	1.14776	2300	1.0987	2300	1.26969	2300	0.621455	2300	0.545477	2300	0.726591	2300	1.19265	2300	0.618452	2300	1.22662	2300	0.608765
2400	0.968055	2400	0.85526	2400	0.74277	2400	1.30242	2400	0.822635	2400	0.450931	2400	1.20045	2400	1.10051	2400	1.31162	2400	0.642749	2400	0.551719	2400	0.793068	2400	1.15134	2400	0.657875	2400	1.26375	2400	0.693775
2500	1.00138	2500	0.888472	2500	0.683804	2500	1.30588	2500	0.79609	2500	0.462632	2500	1.24268	2500	1.08654	2500	1.22167	2500	0.666908	2500	0.586824	2500	0.905528	2500	1.18477	2500	0.680417	2500	1.31945	2500	0.64769
2600	1.02253	2600	0.856509	2600	0.764854	2600	1.30882	2600	0.812789	2600	0.484239	2600	1.1902	2600	1.19618	2600	1.23124	2600	0.650189	2600	0.56652	2600	0.972576	2600	1.18426	2600	0.698622	2600	1.21599	2600	0.63776
2700	1.03151	2700	0.952709	2700	0.810025	2700	1.44461	2700	0.840366	2700	0.490111	2700	1.23606	2700	1.169	2700	1.25471	2700	0.676026	2700	0.582631	2700	0.942228	2700	1.29007	2700	0.764699	2700	1.20572	2700	0.723018
2800	1.11765	2800	0.978557	2800	0.810082	2800	1.40711	2800	0.889432	2800	0.499072	2800	1.25968	2800	1.19876	2800	1.31419	2800	0.711624	2800	0.565868	2800	1.00596	2800	1.22124	2800	0.861908	2800	1.20828	2800	0.775522
2900	1.17334	2900	1.02313	2900	0.785919	2900	1.3745	2900	0.881977	2900	0.52273	2900	1.30139	2900	1.20714	2900	1.36049	2900	0.745891	2900	0.615729	2900	1.02595	2900	1.21361	2900	0.846541	2900	1.20748	2900	0.823333
3000	1.25178	3000	1.00415	3000	0.774212	3000	1.3409	3000	0.933821	3000	0.54226	3000	1.27759	3000	1.29242	3000	1.37769	3000	0.766354	3000	0.613702	3000	1.03986	3000	1.23081	3000	0.854888	3000	1.39305	3000	0.860439
3100	1.2871	3100	1.08697	3100	0.790135	3100	1.41991	3100	0.938037	3100	0.529878	3100	1.27335	3100	1.23725	3100	1.37292	3100	0.764269	3100	0.635565	3100	0.984214	3100	1.14142	3100	0.999233	3100	1.37974	3100	0.837451
3200	1.28605	3200	1.02761	3200	0.819097	3200	1.46444	3200	1.07984	3200	0.569112	3200	1.36503	3200	1.18086	3200	1.45516	3200	0.802969	3200	0.620088	3200	1.01498	3200	1.10856	3200	0.936547	3200	1.32755	3200	0.869821
3300	1.32536	3300	0.998875	3300	0.830748	3300	1.38165	3300	1.0414	3300	0.55293	3300	1.35331	3300	1.1673	3300	1.42292	3300	0.838673	3300	0.618822	3300	1.01247	3300	1.1817	3300	0.991171	3300	1.33732	3300	0.946009
3400	1.32931	3400	1.00065	3400	0.842483	3400	1.44101	3400	1.04734	3400	0.565777	3400	1.4331	3400	1.22563	3400	1.4538	3400	0.843214	3400	0.643875	3400	0.941802	3400	1.25077	3400	0.997073	3400	1.21262	3400	0.943465
3500	1.33839	3500	0.935749	3500	0.762832	3500	1.48599	3500	1.12683	3500	0.597092	3500	1.42875	3500	1.27487	3500	1.40395	3500	0.85888	3500	0.638237	3500	0.921294	3500	1.32324	3500	1.04182	3500	1.17947	3500	0.949366
3600	1.37133	3600	1.03432	3600	0.830226	3600	1.46209	3600	1.17674	3600	0.606164	3600	1.36913	3600	1.26496	3600	1.4547	3600	0.888498	3600	0.667568	3600	0.92824	3600	1.27311	3600	1.02972	3600	1.19437	3600	0.915902
3700	1.41605	3700	1.01642	3700	0.860764	3700	1.4651	3700	1.28754	3700	0.625348	3700	1.38627	3700	1.27501	3700	1.43586	3700	0.870546	3700	0.65001	3700	0.952271	3700	1.37311	3700	1.06618	3700	1.20988	3700	0.926605
3800	1.41993	3800	1.04389	3800	0.845402	3800	1.48425	3800	1.26095	3800	0.627328	3800	1.4126	3800	1.25685	3800	1.42189	3800	0.853869	3800	0.715992	3800	1.00369	3800	1.37082	3800	1.08979	3800	1.14261	3800	0.876706
3900	1.41913	3900	1.01397	3900	0.860199	3900	1.41628	3900	1.31936	3900	0.609511	3900	1.32514	3900	1.38615	3900	1.49594	3900	0.781663	3900	0.665849	3900	1.05213	3900	1.33956	3900	1.12993	3900	1.18951	3900	0.895189
4000	1.47592	4000	1.04609	4000	0.867327	4000	1.38931	4000	1.3876	4000	0.584801	4000	1.37834	4000	1.40306	4000	1.51383	4000	0.788826	4000	0.708747	4000	1.12379	4000	1.40613	4000	1.16114	4000	1.18933	4000	0.937085
4100	1.49361	4100	1.04702	4100	0.918455	4100	1.42775	4100	1.3493	4100	0.59364	4100	1.46077	4100	1.40667	4100	1.5796	4100	0.853957	4100	0.744246	4100	1.10507	4100	1.33781	4100	1.20031	4100	1.18767	4100	0.929508
4200	1.44512	4200	1.02193	4200	0.869914	4200	1.45935	4200	1.33125	4200	0.633941	4200	1.42087	4200	1.47626	4200	1.64409	4200	0.901194	4200	0.665229	4200	1.07856	4200	1.34236	4200	1.23464	4200	1.32312	4200	0.886293
4300	1.47014	4300	0.965763	4300	0.948724	4300	1.40343	4300	1.29446	4300	0.557835	4300	1.34667	4300	1.49657	4300	1.63625	4300	0.917301	4300	0.673849	4300	1.11972	4300	1.42118	4300	1.27779	4300	1.27552	4300	0.87319
4400	1.45221	4400	1.00675	4400	0.971428	4400	1.41412	4400	1.32052	4400	0.603413	4400	1.37839	4400	1.36019	4400	1.56489	4400	0.909206	4400	0.711939	4400	1.07097	4400	1.46205	4400	1.2369	4400	1.31649	4400	0.959972
4500	1.52788	4500	0.988141	4500	0.979615	4500	1.39247	4500	1.37282	4500	0.632321	4500	1.3417	4500	1.42773	4500	1.57691	4500	0.929967	4500	0.798449	4500	1.16563	4500	1.51074	4500	1.2933	4500	1.33555	4500	0.932962
4600	1.50825	4600	1.00037	4600	0.983092	4600	1.4463	4600	1.42124	4600	0.608165	4600	1.41918	4600	1.48851	4600	1.54856	4600	0.989867	4600	0.759438	4600	1.08625	4600	1.57404	4600	1.29312	4600	1.34441	4600	0.95752
4700	1.62186	4700	1.04651	4700	1.02559	4700	1.52269	4700	1.43446	4700	0.656537	4700	1.4197	4700	1.54905	4700	1.57125	4700	0.901687	4700	0.759448	4700	1.10719	4700	1.53661	4700	1.25836	4700	1.28724	4700	0.925047
4800	1.52288	4800	1.03588	4800	1.01159	4800	1.46881	4800	1.45024	4800	0.662765	4800	1.43512	4800	1.5403	4800	1.51689	4800	0.916658	4800	0.760161	4800	1.16233	4800	1.62756	4800	1.30219	4800	1.35198	4800	0.852662
4900	1.60526	4900	1.00521	4900	0.996394	4900	1.60431	4900	1.48831	4900	0.697246	4900	1.42989	4900	1.68235	4900	1.53171	4900	1.01453	4900	0.816614	4900	1.19873	4900	1.61502	4900	1.31722	4900	1.26534	4900	0.909653
5000	1.64841	5000	1.07343	5000	0.99506	5000	1.50584	5000	1.47635	5000	0.739733	5000	1.38942	5000	1.70626	5000	1.57769	5000	1.06237	5000	0.810731	5000	1.183	5000	1.66515	5000	1.32031	5000	1.25272	5000	0.824988
5100	1.61062	5100	1.12247	5100	1.05123	5100	1.5404	5100	1.50269	5100	0.717743	5100	1.41614	5100	1.74873	5100	1.50929	5100	1.04841	5100	0.745303	5100	1.1577	5100	1.76993	5100	1.32449	5100	1.16943	5100	0.833391
5200	1.67737	5200	1.08428	5200	1.0783	5200	1.60936	5200	1.49438	5200	0.753397	5200	1.39199	5200	1.69314	5200	1.56155	5200	1.06086	5200	0.780547	5200	1.13009	5200	1.67731	5200	1.35605	5200	1.20378	5200	0.863474
5300	1.78029	5300	1.08338	5300	1.0053	5300	1.60749	5300	1.44691	5300	0.779503	5300	1.39294	5300	1.87591	5300	1.64983	5300	1.17628	5300	0.81141	5300	1.13005	5300	1.61355	5300	1.3545	5300	1.26555	5300	0.853047
5400	1.82106	5400	1.07848	5400	1.07643	5400	1.53656	5400	1.58439	5400	0.769572	5400	1.35014	5400	1.88628	5400	1.64437	5400	1.28906	5400	0.772892	5400	1.10213	5400	1.6757	5400	1.28079	5400	1.26381	5400	0.872003
5500	1.84471	5500	1.14026	5500	1.00084	5500	1.6119	5500	1.54089	5500	0.783708	5500	1.42744	5500	1.91277	5500	1.67023	5500	1.29648	5500	0.747832	5500	1.17166	5500	1.73621	5500	1.34942	5500	1.2963	5500	0.881828
5600	1.88733	5600	1.10773	5600	0.983854	5600	1.59694	5600	1.56152	5600	0.794388	5600	1.41238	5600	1.95603	5600	1.58526	5600	1.20508	5600	0.81951	5600	1.09681	5600	1.75967	5600	1.29299	5600	1.30883	5600	0.917418
5700	1.89819	5700	1.0904	5700	0.959657	5700	1.63488	5700	1.56621	5700	0.77183	5700	1.34977	5700	1.94745	5700	1.54343	5700	1.31567	5700	0.833982	5700	1.20683	5700	1.73339	5700	1.33652	5700	1.35656	5700	0.958322
5800	1.92445	5800	1.10551	5800	0.970931	5800	1.70693	5800	1.52805	5800	0.810636	5800	1.37133	5800	1.94581	5800	1.64497	5800	1.39878	5800	0.882034	5800	1.25398	5800	1.72011	5800	1.35038	5800	1.43192	5800	0.910772
5900	1.92057	5900	1.09453	5900	1.02438	5900	1.65436	5900	1.49139	5900	0.810884	5900	1.41969	5900	1.98255	5900	1.63646	5900	1.32273	5900	0.868393	5900	1.17336	5900	1.78858	5900	1.39582	5900	1.50791	5900	0.943305
6000	1.98624	6000	1.11847	6000	1.00634	6000	1.66665	6000	1.54457	6000	0.847236	6000	1.43449	6000	2.09079	6000	1.69094	6000	1.33249	6000	0.860806	6000	1.28445	6000	1.76512	6000	1.37438	6000	1.46457	6000	0.976886
6100	2.00544	6100	1.07325	6100	0.996985	6100	1.67609	6100	1.52863	6100	0.810379	6100	1.4351	6100	2.10328	6100	1.64123	6100	1.35302	6100	0.849909	6100	1.29974	6100	1.76341	6100	1.33189	6100	1.4864	6100	0.899796
6200	1.99729	6200	1.0446	6200	1.0395	6200	1.73825	6200	1.55542	6200	0.83688	6200	1.51213	6200	2.08597	6200	1.58868	6200	1.31979	6200	0.840147	6200	1.34383	6200	1.81298	6200	1.36055	6200	1.38088	6200	0.912933
6300	1.88083	6300	1.0476	6300	1.01727	6300	1.70723	6300	1.53285	6300	0.823557	6300	1.45626	6300	2.00552	6300	1.54726	6300	1.37012	6300	0.884784	6300	1.3407	6300	1.81418	6300	1.34106	6300	1.35759	6300	0.972747
6400	1.88581	6400	1.05679	6400	1.04562	6400	1.67534	6400	1.44098	6400	0.816018	6400	1.43628	6400	2.00894	6400	1.55008	6400	1.36884	6400	0.916533	6400	1.31331	6400	1.82985	6400	1.31409	6400	1.52234	6400	0.94506
6500	1.87384	6500	1.08712	6500	1.00507	6500	1.72181	6500	1.44725	6500	0.786606	6500	1.3835	6500	1.95269	6500	1.50964	6500	1.39869	6500	0.951585	6500	1.23996	6500	1.84072	6500	1.28613	6500	1.45074	6500	0.950514
6600	1.88095	6600	1.18831	6600	1.10952	6600	1.765	6600	1.49677	6600	0.833485	6600	1.43114	6600	1.91446	6600	1.43094	6600	1.4021	6600	0.946202	6600	1.30654	6600	1.82055	6600	1.33143	6600	1.5192	6600	1.03956
6700	1.918	6700	1.21242	6700	1.0873	6700	1.60889	6700	1.50316	6700	0.809532	6700	1.49887	6700	1.95849	6700	1.46923	6700	1.436	6700	0.977859	6700	1.34579	6700	1.7746	6700	1.36844	6700	1.60299	6700	1.08163
6800	1.90593	6800	1.18914	6800	1.12582	6800	1.76731	6800	1.5482	6800	0.794931	6800	1.54359	6800	1.96781	6800	1.63119	6800	1.51967	6800	1.03383	6800	1.5041	6800	1.82538	6800	1.4358	6800	1.57131	6800	1.13364
6900	1.81119	6900	1.21249	6900	1.13051	6900	1.81124	6900	1.56092	6900	0.827396	6900	1.57895	6900	1.92617	6900	1.60517	6900	1.56409	6900	0.984831	6900	1.46003	6900	1.95278	6900	1.3859	6900	1.50373	6900	1.13692
7000	1.7965	7000	1.17894	7000	1.12308	7000	1.70342	7000	1.59102	7000	0.785015	7000	1.49865	7000	1.98128	7000	1.53368	7000	1.54131	7000	0.982655	7000	1.43253	7000	1.8741	7000	1.34589	7000	1.39144	7000	1.1841
7100	1.77007	7100	1.17343	7100	1.1715	7100	1.77959	7100	1.64867	7100	0.787354	7100	1.52619	7100	1.99542	7100	1.56743	7100	1.58749	7100	0.992122	7100	1.35452	7100	1.83015	7100	1.32278	7100	1.43223	7100	1.23895
7200	1.79221	7200	1.24291	7200	1.15673	7200	1.82553	7200	1.70143	7200	0.804206	7200	1.49812	7200	2.0145	7200	1.50703	7200	1.55679	7200	1.04743	7200	1.37523	7200	1.88736	7200	1.35519	7200	1.45544	7200	1.17168
7300	1.82112	7300	1.26818	7300	1.1696	7300	1.93191	7300	1.64246	7300	0.774814	7300	1.55781	7300	1.98438	7300	1.5517	7300	1.54116	7300	0.999049	7300	1.41036	7300	1.95924	7300	1.44151	7300	1.51352	7300	1.16112
7400	1.91187	7400	1.29358	7400	1.22106	7400	1.92699	7400	1.67393	7400	0.782143	7400	1.56238	7400	2.07721	7400	1.54136	7400	1.46123	7400	0.991979	7400	1.46516	7400	1.91667	7400	1.4612	7400	1.50972	7400	1.13633
7500	1.88461	7500	1.32204	7500	1.15797	7500	1.83915	7500	1.61995	7500	0.814471	7500	1.61409	7500	2.02501	7500	1.64882	7500	1.56285	7500	0.939226	7500	1.49318	7500	1.96627	7500	1.4312	7500	1.45921	7500	1.00897
7600	1.92309	7600	1.29776	7600	1.20897	7600	1.82024	7600	1.5834	7600	0.819329	7600	1.60428	7600	2.0375	7600	1.64163	7600	1.59047	7600	0.970592	7600	1.44719	7600	2.00771	7600	1.41075	7600	1.57764	7600	1.05504
7700	1.89275	7700	1.33267	7700	1.18203	7700	1.82337	7700	1.63868	7700	0.803099	7700	1.60585	7700	1.92375	7700	1.58285	7700	1.65926	7700	1.04986	7700	1.53903	7700	2.03319	7700	1.39741	7700	1.59776	7700	1.02515
7800	1.87398	7800	1.34155	7800	1.16001	7800	1.71775	7800	1.68668	7800	0.797746	7800	1.62592	7800	1.91573	7800	1.57474	7800	1.50627	7800	0.992954	7800	1.50579	7800	1.93496	7800	1.42427	7800	1.66161	7800	1.04771
7900	1.83611	7900	1.35923	7900	1.1598	7900	1.86489	7900	1.64168	7900	0.860965	7900	1.6548	7900	1.92673	7900	1.62478	7900	1.51175	7900	1.05664	7900	1.48977	7900	1.92676	7900	1.41589	7900	1.58175	7900	1.13843
8000	1.82012	8000	1.33252	8000	1.14012	8000	1.80939	8000	1.66824	8000	0.824712	8000	1.58668	8000	1.94023	8000	1.66083	8000	1.49609	8000	1.07364	8000	1.51202	8000	1.94389	8000	1.40134	8000	1.59982	8000	1.26041
8100	1.80711	8100	1.34336	8100	1.11681	8100	1.93734	8100	1.70219	8100	0.849646	8100	1.50431	8100	1.97179	8100	1.73695	8100	1.55751	8100	1.05867	8100	1.60846	8100	1.99765	8100	1.38793	8100	1.61172	8100	1.17791
8200	1.73351	8200	1.34493	8200	1.13469	8200	1.8631	8200	1.68439	8200	0.861491	8200	1.56366	8200	2.08079	8200	1.78323	8200	1.55961	8200	1.12402	8200	1.64987	8200	1.88879	8200	1.50869	8200	1.52684	8200	1.21118
8300	1.76579	8300	1.41033	8300	1.15723	8300	1.9545	8300	1.65706	8300	0.824972	8300	1.61395	8300	2.12829	8300	1.81618	8300	1.54584	8300	1.10849	8300	1.6554	8300	1.83343	8300	1.48964	8300	1.57925	8300	1.07183
8400	1.82758	8400	1.38528	8400	1.12589	8400	2.02678	8400	1.68629	8400	0.823246	8400	1.50696	8400	2.17683	8400	1.78145	8400	1.66801	8400	1.1153	8400	1.56675	8400	1.80158	8400	1.51612	8400	1.53405	8400	1.0454
8500	1.92959	8500	1.40147	8500	1.17515	8500	1.94388	8500	1.65043	8500	0.842968	8500	1.53628	8500	2.1641	8500	1.81263	8500	1.59117	8500	1.14612	8500	1.71238	8500	1.75508	8500	1.46642	8500	1.47804	8500	1.02638
8600	1.9091	8600	1.34859	8600	1.17632	8600	1.85641	8600	1.61656	8600	0.883419	8600	1.54414	8600	2.1381	8600	1.98524	8600	1.56384	8600	1.18442	8600	1.71601	8600	1.74609	8600	1.41025	8600	1.5078	8600	0.976113
8700	1.95895	8700	1.29675	8700	1.25265	8700	1.86295	8700	1.64635	8700	0.865561	8700	1.61936	8700	2.19115	8700	1.89028	8700	1.63151	8700	1.13734	8700	1.66779	8700	1.79499	8700	1.37836	8700	1.53362	8700	1.07431
8800	1.92743	8800	1.31567	8800	1.3656	8800	1.90304	8800	1.78084	8800	0.827931	8800	1.62693	8800	2.26157	8800	1.99381	8800	1.61101	8800	1.10472	8800	1.54505	8800	1.73523	8800	1.26072	8800	1.50692	8800	1.1413
8900	1.92234	8900	1.2634	8900	1.32955	8900	1.90077	8900	1.68156	8900	0.864164	8900	1.62237	8900	2.21183	8900	2.07194	8900	1.62729	8900	1.13766	8900	1.60335	8900	1.75358	8900	1.34437	8900	1.48798	8900	1.11584
9000	1.93141	9000	1.1944	9000	1.32553	9000	1.90611	9000	1.70209	9000	0.905955	9000	1.59122	9000	2.16248	9000	2.19815	9000	1.64702	9000	1.15628	9000	1.65115	9000	1.81793	9000	1.41669	9000	1.50524	9000	1.16964
9100	2.02245	9100	1.23724	9100	1.30276	9100	1.86756	9100	1.7611	9100	0.928741	9100	1.57629	9100	2.16685	9100	2.0994	9100	1.721	9100	1.14369	9100	1.59507	9100	1.81161	9100	1.38273	9100	1.58582	9100	1.17868
9200	1.99876	9200	1.24432	9200	1.36568	9200	1.89361	9200	1.74084	9200	0.909657	9200	1.53316	9200	2.16859	9200	2.192	9200	1.70405	9200	1.14363	9200	1.63048	9200	1.78724	9200	1.37472	9200	1.58752	9200	1.21472
9300	1.99515	9300	1.22715	9300	1.39103	9300	1.86065	9300	1.82994	9300	0.895931	9300	1.57204	9300	2.12439	9300	2.13079	9300	1.63089	9300	1.14073	9300	1.63058	9300	1.81709	9300	1.3964	9300	1.62135	9300	1.27282
9400	1.99471	9400	1.23737	9400	1.37247	9400	1.86614	9400	1.84668	9400	0.917874	9400	1.57351	9400	1.99773	9400	2.23566	9400	1.70598	9400	1.16074	9400	1.61236	9400	1.80574	9400	1.43624	9400	1.73494	9400	1.25832
9500	2.03426	9500	1.22253	9500	1.36574	9500	1.82944	9500	1.84955	9500	0.886095	9500	1.5574	9500	1.89609	9500	2.37366	9500	1.67548	9500	1.1304	9500	1.55607	9500	1.84609	9500	1.5216	9500	1.68502	9500	1.22494
9600	2.06061	9600	1.20828	9600	1.38209	9600	1.85715	9600	1.93793	9600	0.907771	9600	1.64881	9600	1.98263	9600	2.42605	9600	1.65194	9600	1.11002	9600	1.52951	9600	1.78848	9600	1.50346	9600	1.69906	9600	1.21
9700	2.15154	9700	1.22754	9700	1.43035	9700	1.88544	9700	1.9904	9700	0.868195	9700	1.63482	9700	2.13418	9700	2.5116	9700	1.58219	9700	1.11754	9700	1.56895	9700	1.76349	9700	1.46077	9700	1.65276	9700	1.19306
9800	2.03061	9800	1.30982	9800	1.4263	9800	1.87584	9800	2.02862	9800	0.897547	9800	1.63633	9800	2.13247	9800	2.58704	9800	1.5793	9800	1.0818	9800	1.62346	9800	1.70701	9800	1.50738	9800	1.6985	9800	1.14118
9900	2.06408	9900	1.33235	9900	1.47858	9900	1.88893	9900	1.92695	9900	0.905691	9900	1.60078	9900	2.15926	9900	2.48473	9900	1.57609	9900	1.09309	9900	1.60313	9900	1.75049	9900	1.52809	9900	1.65305	9900	1.22533
10000	1.9956	10000	1.34459	10000	1.51862	10000	1.93909	10000	1.94248	10000	0.863586	10000	1.66586	10000	2.20121	10000	2.53222	10000	1.69768	10000	1.10343	10000	1.61474	10000	1.81059	10000	1.48606	10000	1.76801	10000	1.10441
10100	1.95969	10100	1.3431	10100	1.5685	10100	1.87863	10100	1.88805	10100	0.871084	10100	1.67826	10100	2.23626	10100	2.50789	10100	1.76401	10100	1.0602	10100	1.78388	10100	1.79877	10100	1.49721	10100	1.70882	10100	1.05152
10200	2.01153	10200	1.42285	10200	1.60735	10200	1.92033	10200	1.92683	10200	0.843226	10200	1.65588	10200	2.13708	10200	2.5449	10200	1.72293	10200	1.12268	10200	1.71505	10200	1.84618	10200	1.55665	10200	1.75115	10200	1.11336
10300	1.98557	10300	1.46498	10300	1.57817	10300	1.8733	10300	1.89105	10300	0.881559	10300	1.64214	10300	2.21499	10300	2.48819	10300	1.69506	10300	1.25812	10300	1.81766	10300	1.87022	10300	1.44094	10300	1.73836	10300	1.26385
10400	1.95057	10400	1.46894	10400	1.58883	10400	1.88066	10400	1.87748	10400	0.848335	10400	1.62194	10400	2.16894	10400	2.52013	10400	1.73657	10400	1.21007	10400	1.74668	10400	1.87464	10400	1.44481	10400	1.76771	10400	1.20641
10500	2.00843	10500	1.45001	10500	1.59053	10500	1.86521	10500	1.89534	10500	0.880003	10500	1.62918	10500	2.09286	10500	2.4945	10500	1.69283	10500	1.26472	10500	1.76977	10500	1.92289	10500	1.4315	10500	1.74758	10500	1.16937
10600	1.96601	10600	1.46479	10600	1.50619	10600	1.84801	10600	1.93844	10600	0.862638	10600	1.53689	10600	2.12856	10600	2.39265	10600	1.72161	10600	1.2078	10600	1.74515	10600	1.93292	10600	1.3626	10600	1.83312	10600	1.2919
10700	1.94472	10700	1.43957	10700	1.51384	10700	1.81993	10700	1.91799	10700	0.896747	10700	1.58254	10700	2.13457	10700	2.50038	10700	1.78659	10700	1.20892	10700	1.7469	10700	1.97983	10700	1.37081	10700	1.79073	10700	1.24848
10800	1.86296	10800	1.41901	10800	1.44336	10800	1.81377	10800	1.90836	10800	0.915458	10800	1.5036	10800	2.16141	10800	2.51716	10800	1.72733	10800	1.17915	10800	1.85343	10800	1.98672	10800	1.39744	10800	1.84473	10800	1.28624
10900	1.87715	10900	1.42659	10900	1.462	10900	1.87627	10900	1.96848	10900	0.991652	10900	1.58407	10900	2.10245	10900	2.5378	10900	1.78588	10900	1.1835	10900	1.74703	10900	1.95274	10900	1.39408	10900	1.85531	10900	1.37443
11000	1.94139	11000	1.40292	11000	1.51452	11000	1.86838	11000	1.97394	11000	0.945828	11000	1.55508	11000	2.11706	11000	2.58771	11000	1.71074	11000	1.21003	11000	1.68625	11000	1.91601	11000	1.42756	11000	1.90755	11000	1.23153
11100	1.97754	11100	1.44052	11100	1.52475	11100	1.92197	11100	1.9169	11100	0.903586	11100	1.62303	11100	2.03153	11100	2.63673	11100	1.67257	11100	1.20159	11100	1.67228	11100	2.0171	11100	1.40186	11100	1.84238	11100	1.18629
11200	1.98365	11200	1.44104	11200	1.54214	11200	1.97357	11200	1.89428	11200	0.87595	11200	1.59131	11200	2.09455	11200	2.45549	11200	1.61827	11200	1.24758	11200	1.76705	11200	1.97196	11200	1.45216	11200	1.80567	11200	1.12291
11300	1.97114	11300	1.52513	11300	1.56031	11300	2.02385	11300	1.91452	11300	0.92143	11300	1.55648	11300	2.03548	11300	2.47794	11300	1.60885	11300	1.19797	11300	1.74074	11300	1.92005	11300	1.47139	11300	1.87073	11300	1.19357
11400	2.09019	11400	1.52326	11400	1.63811	11400	1.91874	11400	1.87635	11400	0.905871	11400	1.60452	11400	2.03838	11400	2.4943	11400	1.6715	11400	1.23969	11400	1.74726	11400	1.97603	11400	1.47837	11400	1.73349	11400	1.21821
11500	2.14324	11500	1.49174	11500	1.62799	11500	1.95317	11500	1.8576	11500	0.926233	11500	1.60843	11500	2.05851	11500	2.51873	11500	1.70775	11500	1.23782	11500	1.67223	11500	1.92957	11500	1.48516	11500	1.75753	11500	1.28391
11600	2.12708	11600	1.48398	11600	1.60713	11600	2.02883	11600	1.86285	11600	0.931267	11600	1.59862	11600	2.03286	11600	2.49594	11600	1.69661	11600	1.27966	11600	1.78282	11600	1.91558	11600	1.42612	11600	1.70484	11600	1.30949
11700	2.01428	11700	1.56434	11700	1.5567	11700	1.94184	11700	1.83515	11700	0.944916	11700	1.57883	11700	1.95596	11700	2.39157	11700	1.81877	11700	1.27331	11700	1.75147	11700	1.84053	11700	1.45685	11700	1.65153	11700	1.3157
11800	1.93394	11800	1.55675	11800	1.59635	11800	2.07142	11800	1.91641	11800	0.979443	11800	1.56874	11800	2.00024	11800	2.35573	11800	1.90039	11800	1.2717	11800	1.72039	11800	1.81445	11800	1.44557	11800	1.64994	11800	1.28173
11900	1.95897	11900	1.5868	11900	1.62202	11900	2.15648	11900	1.86945	11900	1.0289	11900	1.55096	11900	1.99438	11900	2.448	11900	2.01548	11900	1.26933	11900	1.81174	11900	1.81324	11900	1.41546	11900	1.63543	11900	1.19555
12000	2.00512	12000	1.60524	12000	1.58175	12000	2.29879	12000	1.89299	12000	1.01469	12000	1.59192	12000	2.03656	12000	2.43091	12000	1.92573	12000	1.29246	12000	1.79727	12000	1.8252	12000	1.42652	12000	1.68893	12000	1.25888
12100	1.94846	12100	1.61228	12100	1.57503	12100	2.3174	12100	1.8951	12100	1.05491	12100	1.57589	12100	2.04579	12100	2.45342	12100	1.89988	12100	1.27412	12100	1.82965	12100	1.90827	12100	1.43637	12100	1.75171	12100	1.18511
12200	1.99496	12200	1.58705	12200	1.57812	12200	2.2684	12200	1.91428	12200	1.01026	12200	1.57646	12200	2.20814	12200	2.38657	12200	1.92675	12200	1.33937	12200	1.84378	12200	1.86632	12200	1.40206	12200	1.72453	12200	1.21143
12300	2.01226	12300	1.58046	12300	1.56589	12300	2.28281	12300	1.92834	12300	1.04063	12300	1.58925	12300	2.20492	12300	2.35652	12300	1.93195	12300	1.3618	12300	1.90156	12300	1.92129	12300	1.41562	12300	1.65151	12300	1.21651
12400	2.04793	12400	1.5412	12400	1.58468	12400	2.36088	12400	1.89643	12400	1.08106	12400	1.56876	12400	2.11723	12400	2.37955	12400	1.88416	12400	1.31824	12400	2.05503	12400	1.94402	12400	1.4448	12400	1.62797	12400	1.21353
12500	1.99535	12500	1.5728	12500	1.57397	12500	2.34474	12500	1.91784	12500	1.0483	12500	1.59263	12500	2.17676	12500	2.32174	12500	1.9067	12500	1.25844	12500	2.21493	12500	1.9205	12500	1.48046	12500	1.61892	12500	1.18225
12600	2.06986	12600	1.51447	12600	1.6393	12600	2.39016	12600	1.95457	12600	1.10568	12600	1.59301	12600	2.12301	12600	2.44028	12600	1.89848	12600	1.28473	12600	2.11601	12600	1.90611	12600	1.52932	12600	1.58587	12600	1.21913
12700	2.05076	12700	1.6037	12700	1.62577	12700	2.51783	12700	1.90432	12700	1.11795	12700	1.60745	12700	2.1582	12700	2.34304	12700	1.91743	12700	1.29453	12700	2.18676	12700	1.96077	12700	1.52375	12700	1.66132	12700	1.21096
12800	2.06135	12800	1.71938	12800	1.60564	12800	2.40485	12800	1.97216	12800	1.17332	12800	1.54121	12800	2.14612	12800	2.38356	12800	1.97269	12800	1.26942	12800	2.26081	12800	1.92732	12800	1.47411	12800	1.65665	12800	1.29829
12900	2.23817	12900	1.67742	12900	1.64636	12900	2.44339	12900	1.99106	12900	1.18446	12900	1.61975	12900	2.21049	12900	2.59835	12900	1.95101	12900	1.28593	12900	2.23131	12900	1.91431	12900	1.50197	12900	1.63904	12900	1.35365
13000	2.23425	13000	1.76858	13000	1.58124	13000	2.38637	13000	2.03335	13000	1.20271	13000	1.62497	13000	2.22855	13000	2.45694	13000	2.00652	13000	1.31134	13000	2.12837	13000	2.01066	13000	1.49542	13000	1.57902	13000	1.27961
13100	2.24433	13100	1.68628	13100	1.62916	13100	2.40558	13100	1.92356	13100	1.12357	13100	1.64158	13100	2.23246	13100	2.64765	13100	1.95922	13100	1.36402	13100	2.11883	13100	2.01787	13100	1.51383	13100	1.54855	13100	1.25399
13200	2.25617	13200	1.65631	13200	1.62093	13200	2.43106	13200	1.91957	13200	1.10251	13200	1.65765	13200	2.22751	13200	2.60029	13200	2.00018	13200	1.41384	13200	2.22229	13200	2.03175	13200	1.56226	13200	1.63942	13200	1.27464
13300	2.31452	13300	1.74654	13300	1.64848	13300	2.38234	13300	1.89072	13300	1.15898	13300	1.64448	13300	2.26477	13300	2.57901	13300	2.01131	13300	1.39398	13300	2.27756	13300	2.08602	13300	1.47982	13300	1.72072	13300	1.23228
13400	2.21298	13400	1.6893	13400	1.61932	13400	2.42031	13400	1.93803	13400	1.15821	13400	1.64573	13400	2.27095	13400	2.59343	13400	1.97406	13400	1.4493	13400	2.23844	13400	2.00299	13400	1.52813	13400	1.60442	13400	1.18104
13500	2.21499	13500	1.59434	13500	1.60163	13500	2.40416	13500	1.84744	13500	1.16251	13500	1.63144	13500	2.52196	13500	2.7267	13500	2.00257	13500	1.46191	13500	2.19017	13500	1.97546	13500	1.51023	13500	1.59167	13500	1.22228
13600	2.18207	13600	1.62738	13600	1.62226	13600	2.49476	13600	1.9009	13600	1.17311	13600	1.66723	13600	2.41685	13600	2.66653	13600	1.98092	13600	1.41471	13600	2.24851	13600	2.01873	13600	1.49587	13600	1.65115	13600	1.19315
13700	2.26172	13700	1.59885	13700	1.62831	13700	2.43272	13700	1.92125	13700	1.22112	13700	1.65784	13700	2.32814	13700	2.65638	13700	2.05559	13700	1.52425	13700	2.40151	13700	2.00923	13700	1.57486	13700	1.70556	13700	1.24431
13800	2.28373	13800	1.57565	13800	1.65683	13800	2.51363	13800	1.83435	13800	1.28306	13800	1.67575	13800	2.38147	13800	2.59764	13800	2.04617	13800	1.55516	13800	2.30589	13800	1.91711	13800	1.61429	13800	1.62189	13800	1.31259
13900	2.17717	13900	1.58538	13900	1.61511	13900	2.51991	13900	1.84626	13900	1.22937	13900	1.56973	13900	2.35509	13900	2.61053	13900	2.08635	13900	1.55724	13900	2.32048	13900	1.99596	13900	1.60616	13900	1.57599	13900	1.3334
14000	2.19135	14000	1.58346	14000	1.60437	14000	2.43024	14000	1.8589	14000	1.17653	14000	1.60104	14000	2.28116	14000	2.77763	14000	1.94468	14000	1.57988	14000	2.34449	14000	1.95594	14000	1.6105	14000	1.58205	14000	1.33628
14100	2.15391	14100	1.65571	14100	1.5752	14100	2.42262	14100	1.87019	14100	1.18494	14100	1.61834	14100	2.43331	14100	2.7536	14100	2.0801	14100	1.49883	14100	2.51651	14100	1.95146	14100	1.66181	14100	1.56808	14100	1.29277
14200	2.24125	14200	1.57887	14200	1.59481	14200	2.42141	14200	1.92207	14200	1.23434	14200	1.61771	14200	2.42285	14200	2.72194	14200	2.12027	14200	1.46492	14200	2.59798	14200	2.04666	14200	1.70502	14200	1.64728	14200	1.36209
14300	2.20471	14300	1.67008	14300	1.58063	14300	2.43669	14300	1.91774	14300	1.28731	14300	1.59881	14300	2.3646	14300	2.68312	14300	2.03442	14300	1.44252	14300	2.57918	14300	1.92495	14300	1.6957	14300	1.69213	14300	1.29938
14400	2.19921	14400	1.74998	14400	1.62587	14400	2.53458	14400	1.92653	14400	1.28384	14400	1.60211	14400	2.33268	14400	2.60147	14400	2.049	14400	1.4223	14400	2.59756	14400	1.99664	14400	1.67029	14400	1.67115	14400	1.34711
14500	2.29835	14500	1.6934	14500	1.65776	14500	2.49493	14500	1.97762	14500	1.21211	14500	1.62617	14500	2.17129	14500	2.68711	14500	1.97569	14500	1.43781	14500	2.59576	14500	1.9709	14500	1.70542	14500	1.67635	14500	1.442
14600	2.36321	14600	1.7784	14600	1.62567	14600	2.65467	14600	1.85071	14600	1.16528	14600	1.64401	14600	2.2555	14600	2.67497	14600	1.95659	14600	1.47017	14600	2.59249	14600	1.94908	14600	1.74824	14600	1.65164	14600	1.39034
14700	2.36704	14700	1.75384	14700	1.66197	14700	2.55464	14700	1.85154	14700	1.18715	14700	1.70923	14700	2.34409	14700	2.71994	14700	2.02733	14700	1.50872	14700	2.48652	14700	1.97281	14700	1.65333	14700	1.6791	14700	1.41454
14800	2.28166	14800	1.79824	14800	1.68979	14800	2.49468	14800	1.84865	14800	1.24441	14800	1.71884	14800	2.31736	14800	2.73891	14800	2.08799	14800	1.52706	14800	2.41063	14800	1.95443	14800	1.59092	14800	1.7024	14800	1.39568
14900	2.20999	14900	1.78026	14900	1.72788	14900	2.54633	14900	1.85642	14900	1.24985	14900	1.70333	14900	2.29316	14900	2.97671	14900	2.08115	14900	1.55349	14900	2.44141	14900	1.93964	14900	1.72885	14900	1.68961	14900	1.35783
15000	2.35819	15000	1.90263	15000	1.6891	15000	2.5736	15000	1.86693	15000	1.26022	15000	1.66065	15000	2.30685	15000	2.91725	15000	2.1659	15000	1.58721	15000	2.68182	15000	1.93076	15000	1.71472	15000	1.73258	15000	1.40676
15100	2.38282	15100	1.89708	15100	1.66167	15100	2.59711	15100	1.95389	15100	1.19861	15100	1.61931	15100	2.26923	15100	2.99493	15100	2.2411	15100	1.54637	15100	2.63126	15100	1.87489	15100	1.84658	15100	1.63183	15100	1.40263
15200	2.24082	15200	1.94296	15200	1.67735	15200	2.53831	15200	1.90838	15200	1.22689	15200	1.65441	15200	2.23466	15200	3.0136	15200	2.14839	15200	1.548	15200	2.64762	15200	1.87596	15200	1.84175	15200	1.61845	15200	1.41952
15300	2.26132	15300	1.88858	15300	1.75165	15300	2.49516	15300	1.8983	15300	1.20209	15300	1.61124	15300	2.18446	15300	2.8614	15300	2.17781	15300	1.59653	15300	2.88165	15300	1.87099	15300	1.83627	15300	1.68689	15300	1.45641
15400	2.2255	15400	1.8749	15400	1.72918	15400	2.46651	15400	1.91437	15400	1.21213	15400	1.65256	15400	2.31088	15400	2.82625	15400	2.27522	15400	1.67109	15400	2.77635	15400	1.96546	15400	1.794	15400	1.63352	15400	1.4697
15500	2.06262	15500	1.73357	15500	1.70343	15500	2.50359	15500	1.91097	15500	1.21489	15500	1.70073	15500	2.34272	15500	2.83812	15500	2.29064	15500	1.69872	15500	2.74095	15500	1.98462	15500	1.77598	15500	1.63876	15500	1.45014
15600	2.19299	15600	1.80463	15600	1.76332	15600	2.66096	15600	1.92348	15600	1.18171	15600	1.66441	15600	2.474	15600	2.87108	15600	2.18374	15600	1.74161	15600	2.80107	15600	1.91056	15600	1.82226	15600	1.61689	15600	1.47804
15700	2.19299	15700	1.77189	15700	1.76114	15700	2.79127	15700	1.85058	15700	1.26755	15700	1.70375	15700	2.63406	15700	2.9239	15700	2.40177	15700	1.70801	15700	2.69315	15700	1.97325	15700	1.70879	15700	1.65072	15700	1.37452
15800	2.24489	15800	1.85742	15800	1.7161	15800	2.69801	15800	1.91941	15800	1.28032	15800	1.71723	15800	2.68188	15800	2.8143	15800	2.34563	15800	1.69114	15800	2.70565	15800	1.94358	15800	1.75558	15800	1.64484	15800	1.40314
15900	2.23563	15900	1.89647	15900	1.70875	15900	2.73522	15900	1.91388	15900	1.2292	15900	1.74235	15900	2.6019	15900	2.79717	15900	2.33631	15900	1.75118	15900	2.65757	15900	1.91619	15900	1.95814	15900	1.57906	15900	1.43966
16000	2.18936	16000	1.922	16000	1.73722	16000	2.73808	16000	1.86611	16000	1.24301	16000	1.74843	16000	2.56809	16000	2.73608	16000	2.27511	16000	1.62245	16000	2.58187	16000	1.95501	16000	1.86003	16000	1.57636	16000	1.42932
16100	2.10979	16100	1.95989	16100	1.78629	16100	2.80016	16100	1.87339	16100	1.23843	16100	1.75706	16100	2.61068	16100	2.75661	16100	2.33616	16100	1.64633	16100	2.59026	16100	2.04601	16100	1.93131	16100	1.57397	16100	1.39415
16200	2.18593	16200	1.98742	16200	1.72405	16200	2.86206	16200	1.8527	16200	1.21475	16200	1.75902	16200	2.62377	16200	2.88287	16200	2.23557	16200	1.66938	16200	2.57468	16200	2.06125	16200	1.87929	16200	1.56629	16200	1.34791
16300	2.11739	16300	1.99317	16300	1.72443	16300	2.8593	16300	1.87332	16300	1.19742	16300	1.76873	16300	2.53086	16300	2.79153	16300	2.23817	16300	1.78635	16300	2.63517	16300	2.08718	16300	1.96755	16300	1.55185	16300	1.40232
16400	2.03623	16400	1.89608	16400	1.73084	16400	2.75438	16400	1.91235	16400	1.18347	16400	1.7669	16400	2.5333	16400	2.80209	16400	2.35766	16400	1.84706	16400	2.70691	16400	2.00603	16400	2.04084	16400	1.57307	16400	1.40843
16500	2.07543	16500	1.96626	16500	1.77458	16500	2.85722	16500	1.93347	16500	1.2393	16500	1.72185	16500	2.51264	16500	2.71703	16500	2.32841	16500	1.83231	16500	2.59657	16500	2.04132	16500	2.05668	16500	1.56849	16500	1.39255
16600	2.01206	16600	1.91888	16600	1.72011	16600	2.73632	16600	1.92173	16600	1.25051	16600	1.71037	16600	2.52138	16600	2.77254	16600	2.314	16600	1.75379	16600	2.72877	16600	2.14471	16600	1.94033	16600	1.59541	16600	1.46586
16700	2.07882	16700	1.93149	16700	1.67011	16700	2.75679	16700	1.91779	16700	1.30126	16700	1.74313	16700	2.45212	16700	2.9103	16700	2.28916	16700	1.76696	16700	2.80811	16700	2.04069	16700	1.92261	16700	1.55274	16700	1.45605
16800	2.1146	16800	1.92002	16800	1.68423	16800	2.77096	16800	1.92499	16800	1.32981	16800	1.79444	16800	2.42693	16800	2.92771	16800	2.33951	16800	1.80259	16800	2.76218	16800	2.05099	16800	1.96798	16800	1.59087	16800	1.4291
16900	1.95726	16900	1.93513	16900	1.68673	16900	2.92505	16900	1.89626	16900	1.32426	16900	1.79321	16900	2.42142	16900	2.97868	16900	2.30645	16900	1.88367	16900	2.80146	16900	2.04869	16900	1.97819	16900	1.705	16900	1.39619
17000	1.9729	17000	1.85596	17000	1.68234	17000	3.03607	17000	1.84689	17000	1.30017	17000	1.78778	17000	2.42014	17000	2.98622	17000	2.30111	17000	1.87338	17000	2.64808	17000	1.99137	17000	1.88387	17000	1.66429	17000	1.39176
17100	2.01905	17100	1.88885	17100	1.70573	17100	3.03263	17100	1.95508	17100	1.33881	17100	1.79233	17100	2.41453	17100	2.93757	17100	2.45986	17100	1.8544	17100	2.60379	17100	2.06014	17100	1.82025	17100	1.60907	17100	1.40513
17200	2.02522	17200	1.88211	17200	1.73143	17200	3.01452	17200	1.99363	17200	1.29952	17200	1.82234	17200	2.53473	17200	2.88389	17200	2.43175	17200	1.7593	17200	2.52439	17200	2.00031	17200	1.82036	17200	1.59958	17200	1.43244
17300	2.09942	17300	1.74529	17300	1.78986	17300	3.05627	17300	1.94942	17300	1.32744	17300	1.79432	17300	2.57469	17300	3.00426	17300	2.31242	17300	1.84579	17300	2.59532	17300	1.94791	17300	1.85697	17300	1.62081	17300	1.34742
17400	2.1184	17400	1.91681	17400	1.77309	17400	3.06101	17400	1.97937	17400	1.37336	17400	1.85089	17400	2.737	17400	3.07641	17400	2.35122	17400	1.8932	17400	2.76852	17400	1.98588	17400	1.88244	17400	1.64703	17400	1.32772
17500	2.0939	17500	1.81397	17500	1.69679	17500	3.01673	17500	1.9413	17500	1.38594	17500	1.80697	17500	2.73013	17500	3.0972	17500	2.48371	17500	1.90717	17500	2.76435	17500	1.97566	17500	1.91279	17500	1.59867	17500	1.37432
17600	2.17593	17600	1.8582	17600	1.72217	17600	2.90973	17600	1.96994	17600	1.39928	17600	1.83381	17600	2.88953	17600	3.27292	17600	2.60978	17600	1.85436	17600	2.73067	17600	1.96558	17600	1.91711	17600	1.55454	17600	1.48494
17700	2.18124	17700	1.87624	17700	1.75801	17700	2.86324	17700	1.95555	17700	1.3596	17700	1.80669	17700	2.85566	17700	3.20907	17700	2.54662	17700	1.78038	17700	2.82073	17700	1.9517	17700	1.89398	17700	1.58894	17700	1.47984
17800	2.0849	17800	1.83226	17800	1.79069	17800	2.84618	17800	1.9301	17800	1.40289	17800	1.76526	17800	2.69677	17800	3.33079	17800	2.60951	17800	1.73843	17800	2.91163	17800	1.94599	17800	1.88058	17800	1.66409	17800	1.50401
17900	2.06222	17900	1.83345	17900	1.78593	17900	2.76671	17900	2.01206	17900	1.44945	17900	1.74655	17900	2.80303	17900	3.27398	17900	2.64008	17900	1.75362	17900	2.82202	17900	1.91439	17900	1.8676	17900	1.63317	17900	1.53068
18000	2.07294	18000	1.86319	18000	1.8264	18000	2.83344	18000	1.89406	18000	1.41211	18000	1.82636	18000	2.63301	18000	3.38878	18000	2.75034	18000	1.72984	18000	2.80363	18000	2.00894	18000	1.76784	18000	1.54192	18000	1.57961
18100	2.09587	18100	1.93324	18100	1.81646	18100	2.72524	18100	1.9598	18100	1.41279	18100	1.83118	18100	2.77545	18100	3.47043	18100	2.70997	18100	1.8017	18100	2.93121	18100	1.92267	18100	1.82679	18100	1.62244	18100	1.52468
18200	2.1965	18200	1.87625	18200	1.78655	18200	2.75372	18200	1.94173	18200	1.44993	18200	1.76934	18200	2.6881	18200	3.50403	18200	2.79142	18200	1.7795	18200	2.87051	18200	1.91531	18200	1.85227	18200	1.58597	18200	1.51116
18300	2.11289	18300	1.90921	18300	1.74343	18300	2.7123	18300	1.96942	18300	1.42515	18300	1.7459	18300	2.61361	18300	3.43624	18300	2.78091	18300	1.80154	18300	3.09839	18300	1.92287	18300	1.89378	18300	1.50463	18300	1.41538
18400	2.04595	18400	1.9378	18400	1.71324	18400	2.92577	18400	2.00603	18400	1.46871	18400	1.74573	18400	2.65609	18400	3.60149	18400	2.8403	18400	1.75206	18400	3.23369	18400	1.93241	18400	1.84893	18400	1.59302	18400	1.37771
18500	2.0529	18500	1.94031	18500	1.69281	18500	2.88697	18500	1.95384	18500	1.53704	18500	1.7837	18500	2.68219	18500	3.67092	18500	2.96774	18500	1.83092	18500	3.1567	18500	1.94925	18500	1.85182	18500	1.55038	18500	1.39903
18600	2.09466	18600	1.91349	18600	1.72901	18600	2.80491	18600	1.91256	18600	1.55088	18600	1.75217	18600	2.70197	18600	3.66333	18600	2.86486	18600	1.81903	18600	3.14892	18600	1.89163	18600	1.87727	18600	1.51391	18600	1.38042
18700	2.15743	18700	1.88832	18700	1.7897	18700	2.99059	18700	1.84392	18700	1.54895	18700	1.76703	18700	2.66945	18700	3.75379	18700	2.88803	18700	1.79554	18700	3.07617	18700	1.91677	18700	1.85993	18700	1.53558	18700	1.34652
18800	2.23756	18800	1.81915	18800	1.76406	18800	2.77052	18800	1.87132	18800	1.58179	18800	1.73931	18800	2.76514	18800	3.67704	18800	2.92685	18800	1.77671	18800	3.12639	18800	1.88465	18800	1.81576	18800	1.50383	18800	1.31947
18900	2.24674	18900	1.84691	18900	1.81594	18900	2.77125	18900	1.85817	18900	1.64359	18900	1.7601	18900	2.72176	18900	3.69262	18900	2.95487	18900	1.73585	18900	3.09536	18900	1.87954	18900	1.95448	18900	1.61542	18900	1.32596
19000	2.31064	19000	1.81567	19000	1.84666	19000	2.846	19000	1.86673	19000	1.71134	19000	1.72504	19000	2.81493	19000	3.83454	19000	2.77818	19000	1.73445	19000	3.03483	19000	1.90254	19000	1.989	19000	1.62846	19000	1.37321
19100	2.21525	19100	1.83395	19100	1.83632	19100	2.94935	19100	1.81661	19100	1.79848	19100	1.74453	19100	2.81236	19100	3.83932	19100	2.97359	19100	1.69184	19100	3.13369	19100	1.96215	19100	2.11992	19100	1.61977	19100	1.39235
19200	2.14867	19200	1.95861	19200	1.81391	19200	2.94601	19200	1.7875	19200	1.82439	19200	1.82806	19200	2.84258	19200	3.83081	19200	2.97299	19200	1.69122	19200	3.05277	19200	1.92485	19200	2.11692	19200	1.71807	19200	1.3866
19300	2.08928	19300	1.9376	19300	1.84475	19300	3.03327	19300	1.87335	19300	1.82039	19300	1.74637	19300	2.78755	19300	3.88037	19300	2.9422	19300	1.71766	19300	2.9932	19300	1.95736	19300	2.19131	19300	1.67525	19300	1.35798
19400	2.13061	19400	1.99701	19400	1.81029	19400	2.95307	19400	1.85403	19400	1.84637	19400	1.73063	19400	2.65039	19400	3.90068	19400	2.9425	19400	1.64734	19400	2.99544	19400	1.97004	19400	2.24288	19400	1.64686	19400	1.32517
19500	2.12823	19500	2.00833	19500	1.82043	19500	2.97297	19500	1.81868	19500	1.92442	19500	1.79803	19500	2.77726	19500	3.9648	19500	2.93666	19500	1.64534	19500	2.96389	19500	1.95547	19500	2.254	19500	1.68015	19500	1.38621
19600	2.177	19600	1.88537	19600	1.85172	19600	3.00859	19600	1.79377	19600	1.9499	19600	1.8152	19600	2.80266	19600	3.98207	19600	2.91459	19600	1.68142	19600	2.93677	19600	1.96725	19600	2.34165	19600	1.75079	19600	1.42152
19700	2.12784	19700	1.90236	19700	1.90536	19700	2.89356	19700	1.81772	19700	1.88603	19700	1.80643	19700	2.75369	19700	4.07339	19700	2.99867	19700	1.65715	19700	3.02456	19700	1.90606	19700	2.36748	19700	1.80323	19700	1.44561
19800	2.19453	19800	1.9748	19800	1.85565	19800	2.84708	19800	1.82609	19800	1.88557	19800	1.78517	19800	2.7092	19800	3.98165	19800	3.07499	19800	1.667	19800	3.10299	19800	1.89038	19800	2.44443	19800	1.80643	19800	1.49997
19900	2.13182	19900	1.9551	19900	1.84494	19900	2.78818	19900	1.83763	19900	1.93089	19900	1.77311	19900	2.75662	19900	4.03321	19900	3.06162	19900	1.69988	19900	3.01628	19900	1.87405	19900	2.51093	19900	1.76707	19900	1.47349
20000	2.16939	20000	1.89942	20000	1.8747	20000	2.77462	20000	1.85263	20000	1.80617	20000	1.74683	20000	2.58471	20000	3.89589	20000	3.06847	20000	1.66923	20000	3.0757	20000	1.91361	20000	2.57321	20000	1.74502	20000	1.49565
20100	2.07296	20100	1.97354	20100	1.89738	20100	2.75749	20100	1.81652	20100	1.85505	20100	1.68059	20100	2.65488	20100	3.88813	20100	2.99977	20100	1.66714	20100	3.08238	20100	1.91621	20100	2.49519	20100	1.68855	20100	1.42605
20200	2.02469	20200	1.96942	20200	1.84122	20200	2.89854	20200	1.88558	20200	1.77964	20200	1.76404	20200	2.63213	20200	3.84085	20200	3.0309	20200	1.65655	20200	2.93631	20200	1.98029	20200	2.62581	20200	1.68197	20200	1.52465
20300	2.04357	20300	1.87933	20300	1.85975	20300	2.85548	20300	1.85826	20300	1.74855	20300	1.74288	20300	2.62956	20300	3.85828	20300	3.15647	20300	1.70813	20300	2.97934	20300	1.99969	20300	2.60757	20300	1.68234	20300	1.56121
20400	2.08746	20400	1.77807	20400	1.91588	20400	2.83076	20400	1.91088	20400	1.81854	20400	1.78364	20400	2.73571	20400	3.80049	20400	3.20446	20400	1.70051	20400	2.94923	20400	2.00344	20400	2.6287	20400	1.67355	20400	1.46928
20500	2.15006	20500	1.82365	20500	1.91285	20500	2.87495	20500	1.94656	20500	1.84159	20500	1.85874	20500	2.87201	20500	3.7904	20500	3.15355	20500	1.68852	20500	3.04035	20500	2.08004	20500	2.58364	20500	1.63216	20500	1.48649
20600	2.12674	20600	1.88019	20600	1.93078	20600	2.88139	20600	1.94116	20600	1.88859	20600	1.83965	20600	2.84633	20600	3.65904	20600	3.02361	20600	1.67689	20600	3.23722	20600	2.05997	20600	2.63368	20600	1.61624	20600	1.41294
20700	2.14628	20700	1.77248	20700	1.90774	20700	2.81286	20700	1.90801	20700	1.9239	20700	1.7806	20700	2.68092	20700	3.64323	20700	3.1747	20700	1.74606	20700	3.25	20700	2.0086	20700	2.67782	20700	1.66605	20700	1.3819
20800	2.1863	20800	1.74438	20800	1.87862	20800	2.85651	20800	1.89542	20800	1.96159	20800	1.75988	20800	2.73287	20800	3.62809	20800	3.02932	20800	1.6903	20800	3.33916	20800	2.05524	20800	2.71121	20800	1.69162	20800	1.40055
20900	2.18126	20900	1.80941	20900	1.92948	20900	2.93883	20900	1.95654	20900	1.94334	20900	1.74725	20900	2.68048	20900	3.58132	20900	3.14827	20900	1.70663	20900	3.39418	20900	2.06034	20900	2.61407	20900	1.65427	20900	1.38799
21000	2.24448	21000	1.70896	21000	1.94493	21000	2.87468	21000	1.99778	21000	1.89185	21000	1.84744	21000	2.87805	21000	3.51326	21000	3.24683	21000	1.73709	21000	3.36873	21000	2.02544	21000	2.54935	21000	1.59541	21000	1.45238
21100	2.29294	21100	1.59045	21100	2.0587	21100	2.90659	21100	1.96988	21100	1.94917	21100	1.8458	21100	2.79648	21100	3.50935	21100	3.0915	21100	1.80315	21100	3.23588	21100	2.02938	21100	2.50833	21100	1.55668	21100	1.39081
21200	2.2234	21200	1.65338	21200	2.04476	21200	2.80651	21200	1.89232	21200	1.94607	21200	1.79512	21200	2.84574	21200	3.6982	21200	3.0123	21200	1.77394	21200	3.22844	21200	2.03787	21200	2.39986	21200	1.60856	21200	1.34754
21300	2.31987	21300	1.70156	21300	2.06871	21300	2.76239	21300	1.85139	21300	1.87849	21300	1.76104	21300	3.01968	21300	3.71297	21300	3.05202	21300	1.89245	21300	3.21601	21300	2.01357	21300	2.46323	21300	1.63936	21300	1.48739
21400	2.20278	21400	1.73345	21400	2.08194	21400	2.81797	21400	1.86731	21400	1.93842	21400	1.79827	21400	3.01781	21400	3.653	21400	2.96993	21400	1.8149	21400	3.29925	21400	2.08365	21400	2.42026	21400	1.55428	21400	1.53395
21500	2.19545	21500	1.7639	21500	2.11021	21500	2.75844	21500	1.91331	21500	1.88293	21500	1.78573	21500	2.99983	21500	3.63409	21500	2.99406	21500	1.83211	21500	3.23582	21500	2.05477	21500	2.38362	21500	1.5969	21500	1.54135
21600	2.32428	21600	1.82901	21600	2.09982	21600	2.7995	21600	1.94056	21600	1.91385	21600	1.78303	21600	3.14753	21600	3.56865	21600	2.89023	21600	1.87394	21600	3.12474	21600	2.03972	21600	2.54819	21600	1.61237	21600	1.49111
21700	2.24442	21700	1.82149	21700	2.07966	21700	2.84379	21700	1.96225	21700	1.93134	21700	1.81515	21700	3.07355	21700	3.51437	21700	2.91222	21700	1.8591	21700	3.15273	21700	2.03905	21700	2.5389	21700	1.51266	21700	1.53028
21800	2.3148	21800	1.79323	21800	2.10674	21800	2.9166	21800	1.97028	21800	1.86	21800	1.78453	21800	2.92911	21800	3.52853	21800	2.96341	21800	1.84207	21800	3.12135	21800	2.07691	21800	2.63771	21800	1.59916	21800	1.56408
21900	2.23084	21900	1.79585	21900	2.14075	21900	2.9877	21900	1.91048	21900	1.82882	21900	1.75345	21900	2.8804	21900	3.36824	21900	3.0018	21900	1.9766	21900	3.07278	21900	2.03155	21900	2.48245	21900	1.61755	21900	1.51708
22000	2.26061	22000	1.79757	22000	2.21762	22000	2.99988	22000	1.90967	22000	1.94104	22000	1.80919	22000	2.8787	22000	3.32768	22000	3.01317	22000	1.88026	22000	3.09957	22000	2.05987	22000	2.51824	22000	1.65516	22000	1.63141
22100	2.31646	22100	1.84534	22100	2.19949	22100	3.08411	22100	1.95876	22100	1.94251	22100	1.80278	22100	2.97243	22100	3.34993	22100	3.11976	22100	1.9872	22100	3.1151	22100	2.04206	22100	2.52654	22100	1.69421	22100	1.67165
22200	2.29757	22200	1.88417	22200	2.16482	22200	3.07838	22200	1.97927	22200	1.99818	22200	1.77395	22200	2.9864	22200	3.33703	22200	3.20322	22200	2.01129	22200	2.98766	22200	2.04391	22200	2.50542	22200	1.69351	22200	1.58721
22300	2.39494	22300	1.79527	22300	2.21661	22300	3.11455	22300	1.98939	22300	1.8967	22300	1.86792	22300	3.15377	22300	3.43281	22300	3.16472	22300	2.02701	22300	3.12068	22300	2.03397	22300	2.49366	22300	1.63943	22300	1.58946
22400	2.34003	22400	1.82418	22400	2.34047	22400	3.09326	22400	1.97797	22400	1.91968	22400	1.84797	22400	3.08753	22400	3.46488	22400	3.17844	22400	2.05672	22400	3.21667	22400	2.01103	22400	2.57869	22400	1.58807	22400	1.54843
22500	2.40808	22500	1.82091	22500	2.3154	22500	3.11931	22500	1.93429	22500	1.90695	22500	1.85034	22500	2.96544	22500	3.43282	22500	3.17907	22500	2.05536	22500	3.18244	22500	2.01298	22500	2.58299	22500	1.58664	22500	1.50809
22600	2.4347	22600	1.83878	22600	2.30818	22600	3.08044	22600	1.89087	22600	1.908	22600	1.81394	22600	2.964	22600	3.5618	22600	3.22402	22600	2.16617	22600	3.11721	22600	2.02378	22600	2.466	22600	1.59979	22600	1.50858
22700	2.36624	22700	1.83205	22700	2.26205	22700	3.02733	22700	1.98635	22700	1.98923	22700	1.81459	22700	3.03678	22700	3.57347	22700	3.22164	22700	2.04728	22700	3.21502	22700	2.05342	22700	2.42336	22700	1.56691	22700	1.54325
22800	2.35298	22800	1.8038	22800	2.22351	22800	3.04065	22800	1.9712	22800	2.04398	22800	1.78937	22800	3.03293	22800	3.53532	22800	3.31213	22800	2.0106	22800	3.19739	22800	2.0342	22800	2.46043	22800	1.49117	22800	1.62718
22900	2.35556	22900	1.82437	22900	2.19427	22900	2.95733	22900	2.00515	22900	2.05488	22900	1.83628	22900	3.15047	22900	3.50672	22900	3.30276	22900	2.05162	22900	3.16752	22900	2.02047	22900	2.56374	22900	1.5462	22900	1.59277
23000	2.48321	23000	1.92533	23000	2.20886	23000	2.94367	23000	1.94205	23000	1.97489	23000	1.83794	23000	3.01506	23000	3.55041	23000	3.52362	23000	2.0355	23000	3.22392	23000	2.0608	23000	2.54457	23000	1.57732	23000	1.62919
23100	2.57744	23100	1.92304	23100	2.20878	23100	2.97218	23100	1.90954	23100	2.06733	23100	1.93366	23100	3.05068	23100	3.59524	23100	3.50541	23100	2.07795	23100	3.24159	23100	2.08837	23100	2.40884	23100	1.60681	23100	1.67034
23200	2.50404	23200	1.92698	23200	2.20558	23200	3.00141	23200	1.95457	23200	2.07777	23200	1.96419	23200	3.09532	23200	3.68682	23200	3.48711	23200	2.11844	23200	3.33962	23200	2.09167	23200	2.38788	23200	1.63582	23200	1.61033
23300	2.41789	23300	1.97254	23300	2.22443	23300	2.97083	23300	1.98926	23300	2.15462	23300	1.87109	23300	3.15736	23300	3.62972	23300	3.52981	23300	2.2	23300	3.25397	23300	2.08405	23300	2.33967	23300	1.65137	23300	1.60327
23400	2.51231	23400	1.9417	23400	2.19857	23400	2.99755	23400	1.98809	23400	2.19094	23400	1.93757	23400	3.26202	23400	3.61035	23400	3.44645	23400	2.15687	23400	3.20429	23400	2.11784	23400	2.38447	23400	1.66561	23400	1.53583
23500	2.47058	23500	1.9013	23500	2.18105	23500	2.99144	23500	1.88736	23500	2.28195	23500	1.93894	23500	3.13227	23500	3.80767	23500	3.43662	23500	2.18677	23500	3.27878	23500	2.15568	23500	2.44397	23500	1.56847	23500	1.48692
23600	2.45765	23600	1.86709	23600	2.14027	23600	2.98527	23600	1.95175	23600	2.30382	23600	1.85021	23600	3.27398	23600	3.81229	23600	3.44429	23600	2.2047	23600	3.31535	23600	2.08782	23600	2.51273	23600	1.51699	23600	1.42926
23700	2.43417	23700	1.8706	23700	2.10522	23700	3.00939	23700	1.94406	23700	2.37654	23700	1.85237	23700	3.23578	23700	3.81546	23700	3.56791	23700	2.20135	23700	3.19196	23700	2.02449	23700	2.53598	23700	1.48157	23700	1.50152
23800	2.39869	23800	1.88323	23800	2.20636	23800	2.95975	23800	1.88496	23800	2.38503	23800	1.87416	23800	3.36148	23800	3.9749	23800	3.55161	23800	2.18398	23800	3.32278	23800	2.02695	23800	2.53596	23800	1.47047	23800	1.50581
23900	2.5367	23900	1.9229	23900	2.25507	23900	3.01785	23900	1.84934	23900	2.3678	23900	1.88044	23900	3.44293	23900	3.88884	23900	3.63991	23900	2.16059	23900	3.29743	23900	2.03343	23900	2.60728	23900	1.50228	23900	1.53134
24000	2.49773	24000	1.91985	24000	2.24115	24000	2.9895	24000	1.77618	24000	2.34419	24000	1.92346	24000	3.59819	24000	4.02748	24000	3.72175	24000	2.18546	24000	3.30218	24000	2.0274	24000	2.70752	24000	1.45946	24000	1.56723
24100	2.48061	24100	1.87747	24100	2.21796	24100	2.95758	24100	1.86659	24100	2.32018	24100	1.8765	24100	3.52358	24100	3.8681	24100	3.7312	24100	2.17306	24100	3.43078	24100	1.99741	24100	2.70729	24100	1.42689	24100	1.62124
24200	2.47811	24200	1.86072	24200	2.30287	24200	2.93722	24200	1.9706	24200	2.30849	24200	1.89196	24200	3.33668	24200	3.87127	24200	3.76133	24200	2.08437	24200	3.52154	24200	2.01891	24200	2.5488	24200	1.36681	24200	1.67365
24300	2.4589	24300	1.88094	24300	2.23768	24300	2.93572	24300	1.99054	24300	2.30385	24300	1.79181	24300	3.32088	24300	3.91502	24300	3.65235	24300	2.14502	24300	3.51216	24300	2.01335	24300	2.57994	24300	1.48884	24300	1.61934
24400	2.45445	24400	1.88823	24400	2.28706	24400	2.97278	24400	1.96189	24400	2.35899	24400	1.7646	24400	3.18957	24400	3.93265	24400	3.61427	24400	2.22008	24400	3.50901	24400	1.99651	24400	2.45928	24400	1.52932	24400	1.67045
24500	2.44184	24500	1.87017	24500	2.35786	24500	3.01003	24500	1.96923	24500	2.34186	24500	1.83825	24500	3.23019	24500	3.89586	24500	3.57787	24500	2.20445	24500	3.5587	24500	2.0193	24500	2.39628	24500	1.46377	24500	1.63468
24600	2.4112	24600	2.02623	24600	2.37644	24600	2.94827	24600	1.86869	24600	2.33996	24600	1.8374	24600	3.26168	24600	3.97247	24600	3.5075	24600	2.18577	24600	3.65636	24600	1.99841	24600	2.44865	24600	1.50004	24600	1.57934
24700	2.43209	24700	1.97202	24700	2.37545	24700	2.9542	24700	1.89629	24700	2.35006	24700	1.81634	24700	3.4597	24700	4.02815	24700	3.55212	24700	2.23049	24700	3.85399	24700	1.99543	24700	2.46521	24700	1.46091	24700	1.64582
24800	2.46459	24800	1.93879	24800	2.22993	24800	2.98025	24800	1.97267	24800	2.41147	24800	1.85915	24800	3.35046	24800	3.97758	24800	3.57203	24800	2.15542	24800	3.90533	24800	2.00298	24800	2.45567	24800	1.44599	24800	1.62396
24900	2.50113	24900	2.03012	24900	2.27516	24900	2.93894	24900	2.06359	24900	2.47147	24900	1.83618	24900	3.37876	24900	3.91014	24900	3.60038	24900	2.20306	24900	3.90523	24900	2.01141	24900	2.51633	24900	1.54582	24900	1.58423
25000	2.51351	25000	2.00017	25000	2.33598	25000	2.77948	25000	2.05867	25000	2.34889	25000	1.80964	25000	3.38987	25000	3.85801	25000	3.61445	25000	2.18193	25000	3.83914	25000	2.05685	25000	2.60155	25000	1.49344	25000	1.63729
25100	2.44184	25100	2.01627	25100	2.36167	25100	2.88874	25100	2.03615	25100	2.42605	25100	1.89029	25100	3.32182	25100	3.77543	25100	3.54062	25100	2.13724	25100	3.78148	25100	2.07513	25100	2.68512	25100	1.4368	25100	1.5261
25200	2.50134	25200	1.96321	25200	2.3342	25200	2.90872	25200	1.99006	25200	2.42029	25200	1.90071	25200	3.30999	25200	3.79413	25200	3.48856	25200	2.1687	25200	3.71034	25200	2.05767	25200	2.67006	25200	1.46336	25200	1.58286
25300	2.48746	25300	1.99999	25300	2.34773	25300	2.91613	25300	2.05806	25300	2.33265	25300	1.95091	25300	3.23224	25300	3.6661	25300	3.4329	25300	2.16134	25300	3.71265	25300	2.06526	25300	2.72512	25300	1.51	25300	1.64959
25400	2.58002	25400	2.11235	25400	2.27472	25400	2.87788	25400	2.05147	25400	2.27082	25400	1.89881	25400	3.15236	25400	3.69964	25400	3.51057	25400	2.19859	25400	3.65203	25400	2.07625	25400	2.82747	25400	1.47681	25400	1.64594
25500	2.54236	25500	1.94161	25500	2.199	25500	2.92612	25500	2.098	25500	2.27014	25500	1.9207	25500	3.30503	25500	3.69312	25500	3.45613	25500	2.21262	25500	3.69256	25500	2.01842	25500	2.85946	25500	1.53141	25500	1.66648
25600	2.51554	25600	1.9278	25600	2.2232	25600	2.85622	25600	2.14443	25600	2.15547	25600	1.92314	25600	3.32339	25600	3.86144	25600	3.46778	25600	2.20141	25600	3.70659	25600	2.08437	25600	2.75322	25600	1.36996	25600	1.58378
25700	2.52183	25700	1.97373	25700	2.232	25700	2.97477	25700	2.11896	25700	2.19626	25700	1.92455	25700	3.31087	25700	3.78537	25700	3.39717	25700	2.17911	25700	3.68943	25700	2.06192	25700	2.88192	25700	1.39181	25700	1.5275
25800	2.50735	25800	1.97667	25800	2.27776	25800	2.98734	25800	2.11713	25800	2.11904	25800	1.91691	25800	3.409	25800	3.70597	25800	3.32078	25800	2.18622	25800	3.57258	25800	1.99513	25800	2.83936	25800	1.47803	25800	1.58833
25900	2.55193	25900	1.94858	25900	2.35744	25900	3.02394	25900	2.1892	25900	2.19833	25900	1.84293	25900	3.30858	25900	3.70521	25900	3.37692	25900	2.21034	25900	3.71314	25900	2.05391	25900	2.93923	25900	1.45929	25900	1.52961
26000	2.50898	26000	2.0184	26000	2.36908	26000	3.01893	26000	2.17666	26000	2.225	26000	1.89112	26000	3.38194	26000	3.73802	26000	3.46022	26000	2.29431	26000	3.71793	26000	2.01272	26000	2.89194	26000	1.48442	26000	1.5686
26100	2.48028	26100	2.06638	26100	2.32762	26100	2.94731	26100	2.14555	26100	2.26942	26100	1.89266	26100	3.44675	26100	3.74757	26100	3.52151	26100	2.32635	26100	3.6769	26100	2.05829	26100	2.93442	26100	1.40453	26100	1.55972
26200	2.42316	26200	2.01653	26200	2.3374	26200	2.92557	26200	2.11943	26200	2.26781	26200	1.91163	26200	3.40331	26200	3.70199	26200	3.45286	26200	2.273	26200	3.63961	26200	2.0191	26200	2.84752	26200	1.40893	26200	1.64449
26300	2.46251	26300	1.94108	26300	2.31007	26300	2.92451	26300	2.09553	26300	2.31098	26300	1.91909	26300	3.51658	26300	3.63353	26300	3.51835	26300	2.20796	26300	3.79907	26300	2.01599	26300	2.76429	26300	1.45479	26300	1.55696
26400	2.4105	26400	1.92651	26400	2.27939	26400	2.9337	26400	2.11714	26400	2.2809	26400	1.90652	26400	3.39547	26400	3.62297	26400	3.5516	26400	2.25593	26400	3.82475	26400	1.98984	26400	2.67316	26400	1.43918	26400	1.58914
26500	2.40447	26500	1.93886	26500	2.34808	26500	2.99041	26500	2.07996	26500	2.21429	26500	1.87559	26500	3.38799	26500	3.61985	26500	3.52926	26500	2.37616	26500	3.87538	26500	1.96011	26500	2.78619	26500	1.45026	26500	1.59703
26600	2.42282	26600	1.94433	26600	2.27612	26600	2.96229	26600	2.14041	26600	2.28723	26600	1.81797	26600	3.35597	26600	3.55554	26600	3.46621	26600	2.32269	26600	3.91014	26600	1.98818	26600	2.80627	26600	1.41185	26600	1.58138
26700	2.4069	26700	1.8697	26700	2.35017	26700	2.89662	26700	2.0301	26700	2.20661	26700	1.82963	26700	3.29639	26700	3.53032	26700	3.50525	26700	2.34649	26700	3.83973	26700	1.97462	26700	2.64782	26700	1.47649	26700	1.58301
26800	2.41253	26800	1.88696	26800	2.34965	26800	2.9179	26800	2.05185	26800	2.24337	26800	1.78566	26800	3.21232	26800	3.46411	26800	3.49791	26800	2.37142	26800	3.8321	26800	2.03419	26800	2.63244	26800	1.50201	26800	1.6273
26900	2.5057	26900	1.87787	26900	2.32143	26900	2.97363	26900	2.07353	26900	2.3491	26900	1.79004	26900	3.30701	26900	3.57613	26900	3.37532	26900	2.33295	26900	3.72779	26900	2.03132	26900	2.62002	26900	1.55743	26900	1.50362
27000	2.43793	27000	1.90147	27000	2.33475	27000	2.99704	27000	2.14219	27000	2.36268	27000	1.7585	27000	3.309	27000	3.57787	27000	3.53346	27000	2.34806	27000	3.74311	27000	2.05292	27000	2.67284	27000	1.58545	27000	1.53814
27100	2.42866	27100	1.95643	27100	2.37917	27100	2.93995	27100	2.09711	27100	2.38208	27100	1.74172	27100	3.25035	27100	3.39764	27100	3.52982	27100	2.41707	27100	3.78704	27100	2.01556	27100	2.59067	27100	1.58789	27100	1.53938
27200	2.40832	27200	2.1039	27200	2.372	27200	2.94128	27200	2.00863	27200	2.38187	27200	1.76734	27200	3.0096	27200	3.36261	27200	3.6479	27200	2.46483	27200	3.80291	27200	1.98817	27200	2.56578	27200	1.56683	27200	1.53314
27300	2.41806	27300	2.00782	27300	2.51226	27300	2.96623	27300	1.98172	27300	2.38798	27300	1.69471	27300	3.06105	27300	3.42219	27300	3.51891	27300	2.42724	27300	3.84333	27300	2.07459	27300	2.46031	27300	1.49133	27300	1.43923
27400	2.40051	27400	1.97006	27400	2.56669	27400	3.00404	27400	1.9887	27400	2.33677	27400	1.7554	27400	3.06845	27400	3.43991	27400	3.4926	27400	2.52041	27400	3.86031	27400	2.04373	27400	2.48955	27400	1.52988	27400	1.49729
27500	2.31566	27500	1.89797	27500	2.50959	27500	3.05867	27500	1.95569	27500	2.33916	27500	1.74159	27500	3.01108	27500	3.47997	27500	3.56123	27500	2.44846	27500	3.8343	27500	2.04983	27500	2.4871	27500	1.55368	27500	1.446
27600	2.29975	27600	1.84454	27600	2.38429	27600	2.99922	27600	1.9335	27600	2.24296	27600	1.77704	27600	3.06897	27600	3.54115	27600	3.50342	27600	2.47426	27600	3.84611	27600	2.05236	27600	2.5571	27600	1.51	27600	1.4982
27700	2.29877	27700	1.81306	27700	2.3666	27700	3.00375	27700	1.99005	27700	2.26663	27700	1.69764	27700	3.0973	27700	3.41114	27700	3.57704	27700	2.36218	27700	3.76191	27700	2.03312	27700	2.55015	27700	1.52936	27700	1.46658
27800	2.24237	27800	1.98157	27800	2.45149	27800	2.91311	27800	2.08317	27800	2.35454	27800	1.70718	27800	3.11746	27800	3.46642	27800	3.58618	27800	2.3696	27800	3.78843	27800	2.13984	27800	2.68824	27800	1.56415	27800	1.5609
27900	2.23552	27900	2.04444	27900	2.40969	27900	2.96713	27900	2.03754	27900	2.31183	27900	1.72735	27900	3.17575	27900	3.37281	27900	3.54391	27900	2.40966	27900	3.62842	27900	2.08263	27900	2.77654	27900	1.4718	27900	1.55438
28000	2.31372	28000	2.02995	28000	2.37571	28000	2.97512	28000	1.97052	28000	2.27026	28000	1.83447	28000	3.13104	28000	3.40269	28000	3.51102	28000	2.36448	28000	3.63462	28000	2.04237	28000	2.71079	28000	1.51808	28000	1.60613
28100	2.28021	28100	2.08324	28100	2.38101	28100	3.04867	28100	1.97214	28100	2.37038	28100	1.79682	28100	3.06855	28100	3.50023	28100	3.45027	28100	2.33425	28100	3.64254	28100	2.02112	28100	2.80821	28100	1.57142	28100	1.47561
28200	2.39034	28200	2.09488	28200	2.4324	28200	3.02727	28200	2.06451	28200	2.35101	28200	1.78124	28200	3.17643	28200	3.49672	28200	3.54717	28200	2.3212	28200	3.61218	28200	1.95541	28200	2.90242	28200	1.57927	28200	1.39317
28300	2.34823	28300	2.07507	28300	2.4865	28300	3.10206	28300	2.03659	28300	2.35659	28300	1.77536	28300	3.20549	28300	3.54663	28300	3.56476	28300	2.25261	28300	3.75063	28300	2.02932	28300	2.96131	28300	1.53283	28300	1.32879
28400	2.29163	28400	2.02808	28400	2.39787	28400	3.01991	28400	2.10203	28400	2.37132	28400	1.80668	28400	3.16453	28400	3.47498	28400	3.46461	28400	2.1837	28400	3.73695	28400	2.02197	28400	2.85311	28400	1.51781	28400	1.45769
28500	2.41616	28500	2.05462	28500	2.37691	28500	3.09782	28500	2.05293	28500	2.32548	28500	1.74852	28500	3.05689	28500	3.31428	28500	3.48399	28500	2.17221	28500	3.61116	28500	2.02189	28500	2.88519	28500	1.61308	28500	1.39013
28600	2.46456	28600	2.00433	28600	2.30087	28600	3.07346	28600	2.0214	28600	2.38812	28600	1.7229	28600	3.03015	28600	3.30388	28600	3.4697	28600	2.12441	28600	3.72915	28600	2.05769	28600	2.86457	28600	1.60235	28600	1.38106
28700	2.53204	28700	2.12668	28700	2.31238	28700	3.12676	28700	2.01303	28700	2.36401	28700	1.83219	28700	3.12651	28700	3.37815	28700	3.54311	28700	2.29642	28700	3.81762	28700	1.9989	28700	2.89978	28700	1.58646	28700	1.3875
28800	2.48718	28800	2.19751	28800	2.35292	28800	3.11486	28800	2.08781	28800	2.34644	28800	1.83549	28800	3.18401	28800	3.50017	28800	3.54784	28800	2.30923	28800	3.89506	28800	2.0542	28800	2.91999	28800	1.50274	28800	1.36352
28900	2.57934	28900	2.16051	28900	2.36097	28900	3.08166	28900	2.09535	28900	2.23546	28900	1.794	28900	3.32591	28900	3.40268	28900	3.6198	28900	2.41212	28900	3.94175	28900	2.05773	28900	3.06964	28900	1.54812	28900	1.39007
29000	2.50735	29000	2.10303	29000	2.27301	29000	3.06734	29000	2.14502	29000	2.24819	29000	1.80507	29000	3.20972	29000	3.51284	29000	3.60092	29000	2.46977	29000	3.81313	29000	2.02937	29000	3.05021	29000	1.56742	29000	1.45492
29100	2.46909	29100	2.13934	29100	2.28776	29100	3.05054	29100	2.09773	29100	2.34332	29100	1.79462	29100	3.21135	29100	3.48414	29100	3.76404	29100	2.46651	29100	3.77438	29100	2.00736	29100	3.08529	29100	1.53175	29100	1.41105
29200	2.49285	29200	2.21437	29200	2.25763	29200	3.06187	29200	2.10644	29200	2.45535	29200	1.88501	29200	3.22729	29200	3.5757	29200	3.78514	29200	2.47614	29200	3.66455	29200	1.94797	29200	3.02758	29200	1.57311	29200	1.4308
29300	2.51898	29300	2.17135	29300	2.21074	29300	3.11891	29300	2.09134	29300	2.46204	29300	1.81995	29300	3.37093	29300	3.5116	29300	3.66899	29300	2.47023	29300	3.83821	29300	1.9595	29300	3.09781	29300	1.61476	29300	1.44109
29400	2.58021	29400	2.13739	29400	2.2623	29400	3.03974	29400	2.08646	29400	2.4486	29400	1.89825	29400	3.50296	29400	3.51892	29400	3.67062	29400	2.38712	29400	3.9029	29400	1.97689	29400	3.06456	29400	1.59993	29400	1.52642
29500	2.49926	29500	2.1064	29500	2.23513	29500	2.98259	29500	2.12189	29500	2.42527	29500	1.89208	29500	3.54546	29500	3.65071	29500	3.70676	29500	2.46912	29500	4.10461	29500	1.95908	29500	3.02662	29500	1.54074	29500	1.5709
29600	2.54649	29600	2.18432	29600	2.27852	29600	2.94463	29600	2.09315	29600	2.44303	29600	1.83419	29600	3.56982	29600	3.61158	29600	3.84003	29600	2.48008	29600	4.14651	29600	1.96787	29600	3.13109	29600	1.51924	29600	1.59665
29700	2.4598	29700	2.26091	29700	2.27741	29700	2.88763	29700	2.13123	29700	2.2947	29700	1.83781	29700	3.44212	29700	3.71579	29700	3.81291	29700	2.50368	29700	3.9884	29700	2.03414	29700	3.07426	29700	1.51091	29700	1.56501
29800	2.50694	29800	2.29517	29800	2.23426	29800	2.8552	29800	2.16226	29800	2.40436	29800	1.92434	29800	3.49906	29800	3.64691	29800	3.93598	29800	2.43955	29800	4.05483	29800	2.01212	29800	3.10615	29800	1.5095	29800	1.53989
29900	2.42523	29900	2.3058	29900	2.31075	29900	2.96762	29900	2.15518	29900	2.36161	29900	1.83728	29900	3.47628	29900	3.7167	29900	3.8748	29900	2.411	29900	4.07294	29900	1.99182	29900	3.13829	29900	1.53418	29900	1.50845
30000	2.38709	30000	2.26642	30000	2.3024	30000	2.96519	30000	2.15098	30000	2.41618	30000	1.88153	30000	3.51488	30000	3.70861	30000	3.81331	30000	2.38162	30000	4.22227	30000	1.98801	30000	3.10053	30000	1.58365	30000	1.54054
30100	2.31171	30100	2.1939	30100	2.29706	30100	2.97036	30100	2.17751	30100	2.35729	30100	1.84577	30100	3.41315	30100	3.7272	30100	3.87359	30100	2.50679	30100	4.34154	30100	2.05568	30100	3.15802	30100	1.46654	30100	1.56922
30200	2.33317	30200	2.19998	30200	2.24824	30200	3.00758	30200	2.22845	30200	2.36557	30200	1.88915	30200	3.40278	30200	3.6997	30200	4.0206	30200	2.48983	30200	4.38681	30200	2.05822	30200	3.16117	30200	1.44514	30200	1.56631
30300	2.38026	30300	2.30879	30300	2.28419	30300	2.95142	30300	2.24412	30300	2.41282	30300	1.98383	30300	3.40409	30300	3.68887	30300	3.99421	30300	2.47069	30300	4.44774	30300	2.06493	30300	3.0431	30300	1.50919	30300	1.56285
30400	2.3919	30400	2.37332	30400	2.3722	30400	2.99952	30400	2.20773	30400	2.33024	30400	1.93537	30400	3.50765	30400	3.8527	30400	3.77132	30400	2.46572	30400	4.42886	30400	2.1029	30400	3.0518	30400	1.48425	30400	1.53847
30500	2.42587	30500	2.37655	30500	2.31443	30500	3.03119	30500	2.20878	30500	2.3919	30500	1.88739	30500	3.48891	30500	3.85053	30500	3.93497	30500	2.45244	30500	4.57484	30500	2.07039	30500	3.20951	30500	1.51967	30500	1.54587
30600	2.43004	30600	2.45911	30600	2.34227	30600	3.07485	30600	2.29299	30600	2.33028	30600	1.92157	30600	3.58035	30600	3.69941	30600	3.97981	30600	2.51973	30600	4.67793	30600	2.0633	30600	3.20888	30600	1.53422	30600	1.42246
30700	2.4622	30700	2.34408	30700	2.35353	30700	3.08098	30700	2.24941	30700	2.3212	30700	1.91132	30700	3.59571	30700	3.80868	30700	4.02591	30700	2.59222	30700	4.70635	30700	2.11533	30700	3.26741	30700	1.53185	30700	1.50718
30800	2.35692	30800	2.35	30800	2.40979	30800	3.0425	30800	2.31598	30800	2.36835	30800	1.83342	30800	3.47092	30800	3.74354	30800	4.09163	30800	2.59916	30800	4.75065	30800	2.07517	30800	3.37441	30800	1.5066	30800	1.47795
30900	2.4123	30900	2.28946	30900	2.39344	30900	2.97848	30900	2.25332	30900	2.38315	30900	1.85708	30900	3.50533	30900	3.63123	30900	4.19837	30900	2.60419	30900	4.54536	30900	2.06378	30900	3.28333	30900	1.49034	30900	1.5574
31000	2.34254	31000	2.27132	31000	2.39952	31000	3.06291	31000	2.14798	31000	2.45347	31000	1.81675	31000	3.49587	31000	3.54609	31000	4.29553	31000	2.66577	31000	4.40899	31000	2.14064	31000	3.27532	31000	1.52861	31000	1.56959
31100	2.39494	31100	2.20431	31100	2.44476	31100	2.96052	31100	2.18181	31100	2.35377	31100	1.78098	31100	3.57101	31100	3.46372	31100	4.51958	31100	2.5761	31100	4.53327	31100	2.11878	31100	3.38293	31100	1.51519	31100	1.51737
31200	2.45379	31200	2.11959	31200	2.41167	31200	2.92865	31200	2.27914	31200	2.37582	31200	1.81358	31200	3.64847	31200	3.32688	31200	4.62399	31200	2.53387	31200	4.6173	31200	2.08481	31200	3.36643	31200	1.57404	31200	1.52766
31300	2.41792	31300	2.17497	31300	2.42488	31300	2.96672	31300	2.22895	31300	2.33908	31300	1.8441	31300	3.70731	31300	3.43526	31300	4.7272	31300	2.59098	31300	4.63736	31300	2.02386	31300	3.26599	31300	1.51448	31300	1.4104
31400	2.47015	31400	2.22891	31400	2.41297	31400	3.0391	31400	2.24396	31400	2.35308	31400	1.82665	31400	3.76258	31400	3.4716	31400	4.5505	31400	2.68423	31400	4.75545	31400	2.04466	31400	3.31204	31400	1.54721	31400	1.42308
31500	2.4737	31500	2.26134	31500	2.37613	31500	3.01728	31500	2.20439	31500	2.35231	31500	1.83158	31500	3.73176	31500	3.50056	31500	4.4683	31500	2.77055	31500	4.80315	31500	2.12817	31500	3.38313	31500	1.52836	31500	1.38034
31600	2.50453	31600	2.25581	31600	2.33533	31600	2.98643	31600	2.1393	31600	2.43382	31600	1.82026	31600	3.84873	31600	3.38023	31600	4.63428	31600	2.6998	31600	4.82926	31600	2.10249	31600	3.40934	31600	1.48795	31600	1.50079
31700	2.50112	31700	2.30276	31700	2.34432	31700	2.92956	31700	2.17604	31700	2.38442	31700	1.82659	31700	3.90522	31700	3.36711	31700	4.64282	31700	2.70273	31700	4.76489	31700	2.07278	31700	3.30918	31700	1.53174	31700	1.47987
31800	2.55764	31800	2.33513	31800	2.41802	31800	2.93398	31800	2.17586	31800	2.52005	31800	1.80816	31800	3.92949	31800	3.36146	31800	4.68337	31800	2.67096	31800	4.70432	31800	2.09551	31800	3.38805	31800	1.49645	31800	1.45335
31900	2.49507	31900	2.4259	31900	2.44247	31900	2.92832	31900	2.16226	31900	2.53277	31900	1.86016	31900	4.11378	31900	3.36991	31900	4.65024	31900	2.60485	31900	4.72059	31900	2.01164	31900	3.36787	31900	1.54469	31900	1.50183
32000	2.54413	32000	2.34115	32000	2.38725	32000	2.89954	32000	2.20842	32000	2.53388	32000	1.8375	32000	3.9567	32000	3.44887	32000	4.75437	32000	2.52244	32000	4.5238	32000	2.07651	32000	3.27597	32000	1.55955	32000	1.60261
32100	2.48688	32100	2.46219	32100	2.37301	32100	2.94092	32100	2.18201	32100	2.49655	32100	1.84176	32100	4.07122	32100	3.47865	32100	4.91532	32100	2.57421	32100	4.39842	32100	1.96482	32100	3.30684	32100	1.54046	32100	1.61815
32200	2.61632	32200	2.49857	32200	2.39936	32200	2.90491	32200	2.14226	32200	2.57759	32200	1.78728	32200	4.26179	32200	3.48845	32200	4.98874	32200	2.68402	32200	4.55991	32200	1.94939	32200	3.31122	32200	1.65476	32200	1.55868
32300	2.55615	32300	2.46451	32300	2.42598	32300	2.955	32300	2.18874	32300	2.4336	32300	1.84273	32300	4.28812	32300	3.51113	32300	4.86042	32300	2.69899	32300	4.56838	32300	2.01549	32300	3.53177	32300	1.58605	32300	1.51268
32400	2.51299	32400	2.41389	32400	2.34158	32400	2.96423	32400	2.21323	32400	2.52796	32400	1.82129	32400	4.36003	32400	3.39568	32400	4.97107	32400	2.67257	32400	4.56756	32400	1.97072	32400	3.52477	32400	1.5832	32400	1.53199
32500	2.63945	32500	2.50008	32500	2.34317	32500	2.92968	32500	2.20113	32500	2.39387	32500	1.73833	32500	4.51829	32500	3.361	32500	5.04911	32500	2.59872	32500	4.75846	32500	1.95609	32500	3.51325	32500	1.67855	32500	1.56963
32600	2.62983	32600	2.47512	32600	2.42648	32600	2.9799	32600	2.2862	32600	2.37381	32600	1.82661	32600	4.63716	32600	3.42499	32600	4.93611	32600	2.71326	32600	4.67874	32600	1.97376	32600	3.42829	32600	1.5632	32600	1.51552
32700	2.6508	32700	2.44036	32700	2.30444	32700	3.02276	32700	2.25956	32700	2.39238	32700	1.77562	32700	4.52618	32700	3.46469	32700	4.75764	32700	2.69934	32700	4.7289	32700	2.04696	32700	3.55847	32700	1.55869	32700	1.47774
32800	2.53244	32800	2.54077	32800	2.29377	32800	2.99012	32800	2.24396	32800	2.44659	32800	1.77358	32800	4.46533	32800	3.43554	32800	4.70246	32800	2.69081	32800	4.92465	32800	2.0475	32800	3.47795	32800	1.50135	32800	1.52342
32900	2.54179	32900	2.59061	32900	2.32921	32900	3.04744	32900	2.26792	32900	2.48144	32900	1.8057	32900	4.64941	32900	3.45432	32900	4.56169	32900	2.6736	32900	4.83684	32900	2.05023	32900	3.55444	32900	1.54328	32900	1.44419
33000	2.53792	33000	2.55298	33000	2.2544	33000	2.99604	33000	2.36808	33000	2.38699	33000	1.80385	33000	4.69421	33000	3.47921	33000	4.71079	33000	2.82274	33000	4.80056	33000	2.02552	33000	3.64077	33000	1.48111	33000	1.66826
33100	2.5874	33100	2.60646	33100	2.31728	33100	2.99506	33100	2.39325	33100	2.40258	33100	1.86166	33100	4.81232	33100	3.55183	33100	4.66075	33100	2.79363	33100	4.79765	33100	1.96405	33100	3.56861	33100	1.4618	33100	1.61711
33200	2.55762	33200	2.56009	33200	2.22464	33200	2.95684	33200	2.37263	33200	2.454	33200	1.85165	33200	4.95267	33200	3.36947	33200	4.5486	33200	2.97705	33200	4.78107	33200	1.98046	33200	3.53562	33200	1.4616	33200	1.59156
33300	2.50812	33300	2.58125	33300	2.26502	33300	3.03034	33300	2.30227	33300	2.49069	33300	1.86933	33300	4.84602	33300	3.31384	33300	4.54069	33300	2.91076	33300	4.93832	33300	2.0298	33300	3.4312	33300	1.46193	33300	1.55381
33400	2.49608	33400	2.53038	33400	2.28324	33400	2.96209	33400	2.29159	33400	2.49376	33400	1.83573	33400	4.76824	33400	3.29712	33400	4.58998	33400	2.92481	33400	4.89212	33400	1.97183	33400	3.41988	33400	1.43617	33400	1.64839
33500	2.5003	33500	2.51662	33500	2.28985	33500	2.94706	33500	2.28733	33500	2.47542	33500	1.9345	33500	4.67445	33500	3.33235	33500	4.56792	33500	2.92519	33500	4.84177	33500	2.00842	33500	3.57548	33500	1.46549	33500	1.60553
33600	2.46016	33600	2.42942	33600	2.32955	33600	2.98226	33600	2.23824	33600	2.4941	33600	1.87336	33600	4.78896	33600	3.2993	33600	4.47727	33600	2.89229	33600	4.68284	33600	1.98794	33600	3.52334	33600	1.52082	33600	1.69003
33700	2.52074	33700	2.43312	33700	2.35265	33700	2.87207	33700	2.27076	33700	2.52512	33700	1.8717	33700	4.95084	33700	3.33043	33700	4.48818	33700	2.92544	33700	4.77284	33700	1.9619	33700	3.56409	33700	1.49242	33700	1.61545
33800	2.48402	33800	2.48248	33800	2.40722	33800	2.92606	33800	2.25505	33800	2.5028	33800	1.95086	33800	4.98813	33800	3.4336	33800	4.56297	33800	2.94297	33800	4.87326	33800	2.01667	33800	3.59158	33800	1.49734	33800	1.62472
33900	2.52298	33900	2.47021	33900	2.25212	33900	2.92151	33900	2.25114	33900	2.46884	33900	1.91859	33900	5.08815	33900	3.27342	33900	4.5435	33900	2.9479	33900	4.98845	33900	2.02004	33900	3.5833	33900	1.45923	33900	1.59472
34000	2.48858	34000	2.46051	34000	2.20964	34000	2.90618	34000	2.25152	34000	2.48352	34000	1.96902	34000	4.99505	34000	3.31085	34000	4.65082	34000	2.94012	34000	5.08704	34000	2.05434	34000	3.55261	34000	1.53192	34000	1.652
34100	2.52277	34100	2.49918	34100	2.17178	34100	2.96232	34100	2.2484	34100	2.41056	34100	1.93388	34100	5.03932	34100	3.25028	34100	4.60946	34100	2.86907	34100	5.00512	34100	2.04012	34100	3.53686	34100	1.49931	34100	1.65471
34200	2.50652	34200	2.42305	34200	2.13743	34200	3.06641	34200	2.20462	34200	2.38708	34200	1.90732	34200	4.88257	34200	3.2745	34200	4.67627	34200	3.0073	34200	5.01726	34200	2.07081	34200	3.4708	34200	1.57021	34200	1.62768
34300	2.53099	34300	2.48108	34300	2.13969	34300	3.00562	34300	2.27557	34300	2.31599	34300	1.93457	34300	4.90435	34300	3.35887	34300	4.63575	34300	3.1057	34300	5.02159	34300	2.14481	34300	3.4474	34300	1.52491	34300	1.55602
34400	2.58526	34400	2.44151	34400	2.15147	34400	3.06277	34400	2.26855	34400	2.44382	34400	1.95211	34400	4.87582	34400	3.33562	34400	4.55871	34400	3.0404	34400	5.09038	34400	2.19639	34400	3.36719	34400	1.55874	34400	1.56492
34500	2.56127	34500	2.43625	34500	2.17485	34500	3.08678	34500	2.2265	34500	2.50824	34500	1.9276	34500	4.89928	34500	3.27348	34500	4.54923	34500	3.06415	34500	4.99541	34500	2.21592	34500	3.33604	34500	1.50834	34500	1.56258
34600	2.51239	34600	2.43923	34600	2.21898	34600	3.08054	34600	2.28933	34600	2.43201	34600	1.94109	34600	4.8276	34600	3.26921	34600	4.59163	34600	3.06107	34600	4.95171	34600	2.15171	34600	3.39845	34600	1.47722	34600	1.50717
34700	2.60124	34700	2.45714	34700	2.19769	34700	3.06775	34700	2.33653	34700	2.57377	34700	1.91057	34700	4.6464	34700	3.20638	34700	4.75473	34700	2.97914	34700	4.853	34700	2.09654	34700	3.43321	34700	1.46652	34700	1.57749
34800	2.66535	34800	2.40145	34800	2.29205	34800	3.09166	34800	2.3925	34800	2.34462	34800	1.82498	34800	4.73669	34800	3.22332	34800	4.57979	34800	3.06473	34800	4.81776	34800	2.11564	34800	3.3325	34800	1.44832	34800	1.59755
34900	2.6048	34900	2.44683	34900	2.31652	34900	3.07282	34900	2.39578	34900	2.4511	34900	1.90118	34900	4.63873	34900	3.30895	34900	4.69231	34900	3.10769	34900	4.68415	34900	2.13483	34900	3.23286	34900	1.45734	34900	1.57672
35000	2.54079	35000	2.47285	35000	2.23932	35000	3.18169	35000	2.37826	35000	2.41106	35000	1.89843	35000	4.79139	35000	3.41099	35000	4.76726	35000	3.23152	35000	4.8601	35000	2.12294	35000	3.22907	35000	1.50674	35000	1.53539
35100	2.55008	35100	2.52232	35100	2.2373	35100	3.16562	35100	2.37243	35100	2.42087	35100	1.95215	35100	4.83413	35100	3.33531	35100	4.98006	35100	3.25295	35100	4.89037	35100	2.1473	35100	3.26224	35100	1.56337	35100	1.57533
35200	2.48386	35200	2.4852	35200	2.17332	35200	3.17618	35200	2.37489	35200	2.40489	35200	1.94048	35200	4.92717	35200	3.41776	35200	4.88808	35200	3.27102	35200	4.71952	35200	2.14811	35200	3.32634	35200	1.57762	35200	1.56851
35300	2.55982	35300	2.46816	35300	2.13814	35300	3.05651	35300	2.34603	35300	2.47678	35300	1.86682	35300	4.96598	35300	3.34814	35300	5.00559	35300	3.21244	35300	4.73574	35300	2.1611	35300	3.25919	35300	1.63729	35300	1.54645
35400	2.57315	35400	2.5817	35400	2.05738	35400	3.11791	35400	2.39396	35400	2.48703	35400	1.88132	35400	5.03933	35400	3.37137	35400	5.15134	35400	3.22431	35400	4.63765	35400	2.18429	35400	3.32976	35400	1.61977	35400	1.52968
35500	2.55117	35500	2.48277	35500	2.12339	35500	3.01457	35500	2.44991	35500	2.53216	35500	1.92646	35500	4.88437	35500	3.56064	35500	5.35167	35500	3.24507	35500	4.64603	35500	2.12389	35500	3.37243	35500	1.57777	35500	1.50343
35600	2.60695	35600	2.39852	35600	2.11366	35600	3.14401	35600	2.41899	35600	2.63891	35600	1.90332	35600	4.76832	35600	3.50564	35600	5.3817	35600	3.37026	35600	4.575	35600	2.13208	35600	3.34368	35600	1.61494	35600	1.50745
35700	2.60562	35700	2.47475	35700	2.06746	35700	3.18585	35700	2.3382	35700	2.60896	35700	1.89295	35700	4.68938	35700	3.46053	35700	5.26309	35700	3.48291	35700	4.49147	35700	2.17083	35700	3.39587	35700	1.61337	35700	1.5742
35800	2.59169	35800	2.51174	35800	2.04028	35800	3.24172	35800	2.1982	35800	2.57864	35800	1.85455	35800	4.76781	35800	3.62003	35800	5.3684	35800	3.51787	35800	4.52565	35800	2.19257	35800	3.38462	35800	1.48851	35800	1.56448
35900	2.52855	35900	2.48369	35900	2.07863	35900	3.27764	35900	2.24412	35900	2.54313	35900	1.93768	35900	4.95652	35900	3.63053	35900	5.3831	35900	3.62799	35900	4.75195	35900	2.20393	35900	3.35036	35900	1.55736	35900	1.58676
36000	2.50932	36000	2.44134	36000	2.09364	36000	3.3094	36000	2.24214	36000	2.55414	36000	1.89731	36000	4.97468	36000	3.66111	36000	5.33384	36000	3.64361	36000	4.7025	36000	2.16479	36000	3.30111	36000	1.48842	36000	1.611
36100	2.62025	36100	2.43591	36100	2.13202	36100	3.21237	36100	2.32296	36100	2.57344	36100	1.90948	36100	4.99529	36100	3.57954	36100	5.2859	36100	3.61515	36100	4.80539	36100	2.16288	36100	3.30579	36100	1.53773	36100	1.57507
36200	2.59424	36200	2.50454	36200	2.11936	36200	3.15923	36200	2.31388	36200	2.50121	36200	1.85686	36200	4.91899	36200	3.40596	36200	5.03342	36200	3.81676	36200	4.83033	36200	2.26132	36200	3.32229	36200	1.62919	36200	1.65721
36300	2.58598	36300	2.45788	36300	2.11697	36300	3.2239	36300	2.28333	36300	2.50631	36300	1.89434	36300	4.89323	36300	3.43143	36300	5.19103	36300	3.88826	36300	4.89344	36300	2.25086	36300	3.33606	36300	1.67877	36300	1.75228
36400	2.45405	36400	2.37635	36400	2.12708	36400	3.17272	36400	2.24414	36400	2.55705	36400	1.90013	36400	5.10159	36400	3.54197	36400	5.25487	36400	4.00767	36400	5.04328	36400	2.12483	36400	3.32673	36400	1.63716	36400	1.72538
36500	2.44905	36500	2.37943	36500	2.09269	36500	3.24187	36500	2.29675	36500	2.57787	36500	1.89534	36500	5.12413	36500	3.60064	36500	5.16494	36500	3.82756	36500	4.94308	36500	2.16637	36500	3.38018	36500	1.68178	36500	1.77807
36600	2.47761	36600	2.36761	36600	2.11281	36600	3.28095	36600	2.35496	36600	2.541	36600	1.91589	36600	4.99841	36600	3.67872	36600	5.14598	36600	3.86004	36600	4.89543	36600	2.15453	36600	3.43286	36600	1.71919	36600	1.77513
36700	2.47036	36700	2.3302	36700	2.14629	36700	3.24478	36700	2.41907	36700	2.5605	36700	1.90195	36700	4.9276	36700	3.91763	36700	5.19142	36700	3.80863	36700	4.82202	36700	2.15832	36700	3.4324	36700	1.66835	36700	1.7063
36800	2.50544	36800	2.31132	36800	2.06692	36800	3.33772	36800	2.34745	36800	2.41217	36800	1.85514	36800	4.9176	36800	3.87867	36800	5.2815	36800	3.84041	36800	4.82742	36800	2.06856	36800	3.44736	36800	1.67799	36800	1.72004
36900	2.51345	36900	2.29172	36900	2.03227	36900	3.36291	36900	2.39881	36900	2.44885	36900	1.87233	36900	4.95504	36900	3.8013	36900	5.07851	36900	3.73827	36900	4.77258	36900	2.06734	36900	3.38039	36900	1.69361	36900	1.76114
37000	2.48259	37000	2.29152	37000	2.08066	37000	3.30373	37000	2.35773	37000	2.28996	37000	1.91219	37000	5.04847	37000	3.71525	37000	4.99316	37000	3.74826	37000	4.75024	37000	2.17694	37000	3.51125	37000	1.70557	37000	1.74013
37100	2.49027	37100	2.34563	37100	2.06837	37100	3.36938	37100	2.35712	37100	2.25669	37100	1.85202	37100	5.28551	37100	3.74038	37100	5.16216	37100	3.87288	37100	4.8547	37100	2.12184	37100	3.43907	37100	1.71806	37100	1.67024
37200	2.51558	37200	2.31483	37200	2.12914	37200	3.42232	37200	2.374	37200	2.35169	37200	1.85019	37200	5.26281	37200	3.79972	37200	5.05718	37200	3.92056	37200	4.72102	37200	2.18938	37200	3.43533	37200	1.76291	37200	1.6525
37300	2.54219	37300	2.41855	37300	2.08438	37300	3.42558	37300	2.37318	37300	2.47981	37300	1.8573	37300	5.22781	37300	3.68767	37300	4.95464	37300	3.93541	37300	4.73456	37300	2.12711	37300	3.41663	37300	1.73937	37300	1.66495
37400	2.50634	37400	2.3732	37400	2.10478	37400	3.42884	37400	2.31148	37400	2.49768	37400	1.81529	37400	5.14669	37400	3.57801	37400	5.03653	37400	3.9242	37400	4.66367	37400	2.09592	37400	3.37321	37400	1.75414	37400	1.63261
37500	2.54206	37500	2.43307	37500	2.14697	37500	3.46926	37500	2.33214	37500	2.5696	37500	1.88498	37500	4.9979	37500	3.71057	37500	5.02006	37500	4.00016	37500	4.69908	37500	2.11489	37500	3.2606	37500	1.71685	37500	1.64272
37600	2.55631	37600	2.34748	37600	2.10263	37600	3.34898	37600	2.42966	37600	2.63875	37600	1.88971	37600	4.97757	37600	3.66788	37600	4.89367	37600	4.02435	37600	4.55585	37600	2.08506	37600	3.35955	37600	1.81394	37600	1.57803
37700	2.49628	37700	2.28844	37700	2.05723	37700	3.36287	37700	2.33918	37700	2.54411	37700	1.85782	37700	4.92398	37700	3.68453	37700	4.75108	37700	3.92146	37700	4.65192	37700	2.08547	37700	3.33839	37700	1.70067	37700	1.5759
37800	2.48837	37800	2.2066	37800	2.14868	37800	3.34645	37800	2.47588	37800	2.56672	37800	1.87103	37800	5.07896	37800	3.6378	37800	4.74831	37800	3.8062	37800	4.75311	37800	2.07235	37800	3.29755	37800	1.75039	37800	1.58724
37900	2.52075	37900	2.20776	37900	2.25905	37900	3.4461	37900	2.45861	37900	2.59912	37900	1.90339	37900	5.06677	37900	3.64342	37900	4.69554	37900	3.7667	37900	4.57986	37900	2.02143	37900	3.40453	37900	1.80921	37900	1.57698
38000	2.41412	38000	2.21948	38000	2.19952	38000	3.48225	38000	2.43009	38000	2.60319	38000	1.92235	38000	4.95138	38000	3.65736	38000	4.62644	38000	3.76724	38000	4.46003	38000	2.02351	38000	3.45062	38000	1.77259	38000	1.53362
38100	2.41141	38100	2.24163	38100	2.26166	38100	3.40134	38100	2.45256	38100	2.54018	38100	1.86528	38100	4.97965	38100	3.65906	38100	4.60392	38100	3.97278	38100	4.52153	38100	2.04005	38100	3.49227	38100	1.7801	38100	1.65177
38200	2.46883	38200	2.31455	38200	2.20884	38200	3.42129	38200	2.37206	38200	2.57341	38200	1.94754	38200	4.9033	38200	3.76047	38200	4.65343	38200	3.85261	38200	4.51697	38200	2.0731	38200	3.38451	38200	1.75072	38200	1.65136
38300	2.47069	38300	2.25831	38300	2.2738	38300	3.39869	38300	2.31836	38300	2.56418	38300	1.9574	38300	4.87187	38300	3.89579	38300	4.62112	38300	3.70517	38300	4.44589	38300	2.00783	38300	3.38676	38300	1.69818	38300	1.60964
38400	2.53024	38400	2.24286	38400	2.29767	38400	3.51996	38400	2.36353	38400	2.59402	38400	1.92636	38400	4.9071	38400	3.93198	38400	4.58304	38400	3.54203	38400	4.39278	38400	2.06809	38400	3.47763	38400	1.69102	38400	1.70736
38500	2.54512	38500	2.21798	38500	2.33995	38500	3.42319	38500	2.39342	38500	2.55983	38500	1.88084	38500	4.83212	38500	3.88829	38500	4.48917	38500	3.64356	38500	4.49853	38500	2.13585	38500	3.50127	38500	1.71024	38500	1.70005
38600	2.44459	38600	2.22152	38600	2.28463	38600	3.36392	38600	2.342	38600	2.56004	38600	1.91014	38600	4.92989	38600	3.9109	38600	4.42826	38600	3.64187	38600	4.67414	38600	2.08176	38600	3.56176	38600	1.69922	38600	1.645
38700	2.46573	38700	2.24857	38700	2.28983	38700	3.35343	38700	2.41536	38700	2.5554	38700	1.96872	38700	4.98061	38700	3.89592	38700	4.5973	38700	3.64588	38700	4.70054	38700	2.11546	38700	3.56406	38700	1.59979	38700	1.66281
38800	2.47303	38800	2.28813	38800	2.3117	38800	3.34929	38800	2.46286	38800	2.58293	38800	1.95917	38800	4.83362	38800	3.82811	38800	4.60664	38800	3.49331	38800	4.71118	38800	2.09684	38800	3.48323	38800	1.72503	38800	1.62138
38900	2.46695	38900	2.28172	38900	2.27894	38900	3.34738	38900	2.42715	38900	2.4468	38900	2.01955	38900	4.79051	38900	3.97844	38900	4.51404	38900	3.49926	38900	4.76331	38900	2.16512	38900	3.51522	38900	1.6426	38900	1.68761
39000	2.40746	39000	2.27209	39000	2.22729	39000	3.37696	39000	2.54882	39000	2.48607	39000	2.03321	39000	4.82907	39000	3.90691	39000	4.55928	39000	3.53646	39000	4.8289	39000	2.17726	39000	3.41285	39000	1.71306	39000	1.63161
39100	2.40916	39100	2.35329	39100	2.27441	39100	3.40765	39100	2.5365	39100	2.64432	39100	1.99922	39100	4.79519	39100	3.98531	39100	4.58885	39100	3.59981	39100	4.78316	39100	2.13303	39100	3.42232	39100	1.69982	39100	1.64961
39200	2.42622	39200	2.37293	39200	2.25601	39200	3.49873	39200	2.45315	39200	2.52866	39200	1.96304	39200	4.79497	39200	4.03123	39200	4.68471	39200	3.62931	39200	4.67226	39200	2.00705	39200	3.49819	39200	1.59	39200	1.63399
39300	2.44658	39300	2.39606	39300	2.22779	39300	3.50069	39300	2.5364	39300	2.62996	39300	1.96964	39300	4.68007	39300	4.00217	39300	4.71848	39300	3.64139	39300	4.7508	39300	2.12276	39300	3.56065	39300	1.65358	39300	1.64123
39400	2.49909	39400	2.37766	39400	2.28645	39400	3.38138	39400	2.47855	39400	2.68299	39400	1.92762	39400	4.70417	39400	3.89704	39400	4.67573	39400	3.57694	39400	4.82319	39400	2.04223	39400	3.63722	39400	1.64987	39400	1.63066
39500	2.41683	39500	2.32847	39500	2.316	39500	3.44076	39500	2.49543	39500	2.66806	39500	1.93234	39500	4.55321	39500	4.05348	39500	4.59194	39500	3.44183	39500	4.85767	39500	2.05475	39500	3.4933	39500	1.72967	39500	1.67388
39600	2.34978	39600	2.35971	39600	2.28692	39600	3.42652	39600	2.37841	39600	2.71926	39600	1.86868	39600	4.57062	39600	3.94185	39600	4.55133	39600	3.35443	39600	4.72402	39600	2.13496	39600	3.52865	39600	1.67341	39600	1.72542
39700	2.39316	39700	2.42644	39700	2.33772	39700	3.45641	39700	2.42381	39700	2.69346	39700	1.91073	39700	4.39929	39700	3.94187	39700	4.43306	39700	3.30244	39700	4.89447	39700	2.08653	39700	3.57179	39700	1.72535	39700	1.766
39800	2.36529	39800	2.39075	39800	2.34863	39800	3.4782	39800	2.39678	39800	2.71477	39800	1.8487	39800	4.37644	39800	4.00285	39800	4.46301	39800	3.34808	39800	4.88571	39800	2.07218	39800	3.60167	39800	1.69226	39800	1.76438
39900	2.38658	39900	2.37352	39900	2.32809	39900	3.51153	39900	2.39087	39900	2.6435	39900	1.8705	39900	4.45099	39900	4.13042	39900	4.35765	39900	3.22396	39900	5.03511	39900	2.0789	39900	3.63146	39900	1.68197	39900	1.71372
40000	2.4605	40000	2.41906	40000	2.23571	40000	3.56495	40000	2.39581	40000	2.7605	40000	1.87709	40000	4.42423	40000	4.28169	40000	4.35706	40000	3.27941	40000	4.99503	40000	2.12561	40000	3.55572	40000	1.70937	40000	1.7309
40100	2.5656	40100	2.35742	40100	2.20041	40100	3.43543	40100	2.40639	40100	2.7599	40100	1.87399	40100	4.64932	40100	4.30847	40100	4.43208	40100	3.21002	40100	5.06626	40100	2.15647	40100	3.58078	40100	1.66622	40100	1.73915
40200	2.59768	40200	2.30737	40200	2.28869	40200	3.46723	40200	2.5133	40200	2.63472	40200	1.91559	40200	4.57533	40200	4.23973	40200	4.45891	40200	3.18425	40200	5.05232	40200	2.22143	40200	3.51458	40200	1.64598	40200	1.72437
40300	2.51975	40300	2.39532	40300	2.28094	40300	3.35229	40300	2.44081	40300	2.71608	40300	1.93215	40300	4.7381	40300	4.23899	40300	4.43856	40300	3.2806	40300	4.90301	40300	2.12109	40300	3.53288	40300	1.57248	40300	1.74997
40400	2.50389	40400	2.32304	40400	2.29743	40400	3.36035	40400	2.52559	40400	2.64515	40400	1.93315	40400	4.88325	40400	4.2591	40400	4.43948	40400	3.28649	40400	5.1091	40400	2.10418	40400	3.48508	40400	1.64297	40400	1.64359
40500	2.51587	40500	2.38952	40500	2.21811	40500	3.33133	40500	2.54857	40500	2.59014	40500	1.8413	40500	4.94221	40500	4.30577	40500	4.38834	40500	3.24341	40500	5.10261	40500	2.17004	40500	3.52302	40500	1.56464	40500	1.66177
40600	2.50565	40600	2.42644	40600	2.22904	40600	3.41381	40600	2.52223	40600	2.58215	40600	1.87059	40600	5.02303	40600	4.32475	40600	4.40314	40600	3.34588	40600	5.08529	40600	2.17734	40600	3.42322	40600	1.60481	40600	1.67097
40700	2.49567	40700	2.55203	40700	2.25327	40700	3.41038	40700	2.35952	40700	2.49144	40700	1.88791	40700	4.90998	40700	4.30526	40700	4.35537	40700	3.31807	40700	5.19729	40700	2.1251	40700	3.40894	40700	1.65143	40700	1.68984
40800	2.50642	40800	2.56376	40800	2.29613	40800	3.34758	40800	2.3514	40800	2.57932	40800	1.86883	40800	4.98036	40800	4.21842	40800	4.44951	40800	3.24213	40800	5.47045	40800	2.08638	40800	3.40164	40800	1.64354	40800	1.62034
40900	2.55393	40900	2.46975	40900	2.27015	40900	3.37602	40900	2.33027	40900	2.52648	40900	1.8918	40900	4.91983	40900	4.10294	40900	4.52694	40900	3.24049	40900	5.39469	40900	2.05181	40900	3.53948	40900	1.78238	40900	1.63073
41000	2.52512	41000	2.46338	41000	2.2493	41000	3.34129	41000	2.29112	41000	2.5416	41000	1.86599	41000	4.77057	41000	4.16067	41000	4.40871	41000	3.20266	41000	5.27969	41000	2.06085	41000	3.55417	41000	1.75202	41000	1.70233
41100	2.53947	41100	2.55956	41100	2.28206	41100	3.29979	41100	2.24516	41100	2.58537	41100	1.8485	41100	4.71142	41100	4.15959	41100	4.43549	41100	3.00814	41100	5.33343	41100	2.04213	41100	3.50768	41100	1.63486	41100	1.7558
41200	2.57209	41200	2.45468	41200	2.32166	41200	3.30265	41200	2.19601	41200	2.62056	41200	1.92346	41200	4.6579	41200	4.13652	41200	4.35269	41200	3.08285	41200	5.49935	41200	2.13368	41200	3.67393	41200	1.61722	41200	1.63423
41300	2.45127	41300	2.49051	41300	2.24803	41300	3.25854	41300	2.19778	41300	2.64504	41300	1.94842	41300	4.61668	41300	4.11234	41300	4.45493	41300	3.05115	41300	5.56923	41300	2.03994	41300	3.69725	41300	1.69485	41300	1.58379
41400	2.47539	41400	2.5445	41400	2.30853	41400	3.15512	41400	2.14534	41400	2.60761	41400	1.97069	41400	4.73985	41400	4.2285	41400	4.53335	41400	2.95439	41400	5.58306	41400	2.12915	41400	3.68435	41400	1.6701	41400	1.55279
41500	2.49367	41500	2.54779	41500	2.22381	41500	3.13733	41500	2.15132	41500	2.50162	41500	1.9126	41500	4.73132	41500	4.22626	41500	4.62704	41500	2.93522	41500	5.43692	41500	2.07143	41500	3.81872	41500	1.67453	41500	1.58641
41600	2.49965	41600	2.50288	41600	2.16399	41600	3.22699	41600	2.16083	41600	2.55768	41600	1.94579	41600	4.63253	41600	4.234	41600	4.67756	41600	3.17119	41600	5.48663	41600	2.1516	41600	3.76575	41600	1.7429	41600	1.5238
41700	2.5165	41700	2.4413	41700	2.20861	41700	3.20377	41700	2.22426	41700	2.50008	41700	1.9097	41700	4.69602	41700	4.19831	41700	4.85496	41700	3.13992	41700	5.47818	41700	2.05452	41700	3.66372	41700	1.81174	41700	1.54568
41800	2.58148	41800	2.52239	41800	2.16327	41800	3.17578	41800	2.24293	41800	2.57991	41800	1.89253	41800	4.61293	41800	4.12016	41800	5.0703	41800	3.04001	41800	5.35218	41800	2.08697	41800	3.71984	41800	1.67741	41800	1.67065
41900	2.54194	41900	2.3977	41900	2.18967	41900	3.15231	41900	2.20836	41900	2.39902	41900	1.90874	41900	4.54048	41900	4.11694	41900	5.02616	41900	3.01567	41900	5.40118	41900	2.0058	41900	3.86304	41900	1.70124	41900	1.63218
42000	2.52256	42000	2.29681	42000	2.15629	42000	3.16074	42000	2.19221	42000	2.36829	42000	1.84306	42000	4.29902	42000	4.08517	42000	5.12417	42000	3.0779	42000	5.44226	42000	1.99716	42000	3.73529	42000	1.73829	42000	1.71044
42100	2.54044	42100	2.39245	42100	2.20281	42100	3.16392	42100	2.17861	42100	2.35677	42100	1.8338	42100	4.38148	42100	4.07729	42100	5.07615	42100	3.12091	42100	5.55029	42100	2.15116	42100	3.74722	42100	1.66126	42100	1.66834
42200	2.57229	42200	2.28766	42200	2.14926	42200	3.17979	42200	2.31065	42200	2.39532	42200	1.87409	42200	4.28757	42200	4.09125	42200	5.08319	42200	2.99527	42200	5.87245	42200	2.09891	42200	3.74955	42200	1.71791	42200	1.65924
42300	2.58462	42300	2.29201	42300	2.17187	42300	3.16715	42300	2.21869	42300	2.35877	42300	1.87331	42300	4.36733	42300	4.18904	42300	5.02212	42300	3.03155	42300	5.956	42300	2.17516	42300	3.60574	42300	1.73014	42300	1.70765
42400	2.54103	42400	2.30457	42400	2.18361	42400	3.24133	42400	2.16174	42400	2.34547	42400	1.86174	42400	4.40906	42400	4.19872	42400	5.10225	42400	3.06542	42400	5.77833	42400	2.22357	42400	3.79096	42400	1.74079	42400	1.6918
42500	2.49911	42500	2.26804	42500	2.17643	42500	3.28795	42500	2.17201	42500	2.34641	42500	1.84432	42500	4.34428	42500	4.1235	42500	5.10862	42500	3.09785	42500	5.8167	42500	2.20617	42500	3.85616	42500	1.77873	42500	1.83735
42600	2.49152	42600	2.28394	42600	2.19654	42600	3.28702	42600	2.2352	42600	2.3305	42600	1.86462	42600	4.29816	42600	4.12118	42600	5.18914	42600	3.09373	42600	5.71742	42600	2.21969	42600	3.74513	42600	1.72469	42600	1.80313
42700	2.50742	42700	2.28795	42700	2.19302	42700	3.27801	42700	2.23574	42700	2.26977	42700	1.87721	42700	4.43634	42700	4.21115	42700	5.17895	42700	3.03577	42700	5.63026	42700	2.23969	42700	3.70766	42700	1.68845	42700	1.84209
42800	2.53128	42800	2.2246	42800	2.23325	42800	3.25671	42800	2.16478	42800	2.27311	42800	1.90915	42800	4.39637	42800	4.2186	42800	5.28474	42800	3.0879	42800	5.66691	42800	2.25137	42800	3.75792	42800	1.68278	42800	1.79068
42900	2.49091	42900	2.2404	42900	2.22804	42900	3.35334	42900	2.23213	42900	2.32155	42900	1.90479	42900	4.39122	42900	4.12502	42900	5.29488	42900	3.08136	42900	5.79611	42900	2.24015	42900	3.7961	42900	1.59352	42900	1.72631
43000	2.49141	43000	2.24924	43000	2.19852	43000	3.38706	43000	2.1925	43000	2.42508	43000	1.93744	43000	4.45777	43000	3.9876	43000	5.24169	43000	2.97964	43000	5.65506	43000	2.22691	43000	3.79383	43000	1.61722	43000	1.73497
43100	2.49808	43100	2.24097	43100	2.2093	43100	3.36872	43100	2.19824	43100	2.38447	43100	1.959	43100	4.11423	43100	3.99844	43100	5.17639	43100	3.06713	43100	5.68464	43100	2.19762	43100	3.81906	43100	1.55178	43100	1.72539
43200	2.52711	43200	2.30113	43200	2.21639	43200	3.20673	43200	2.15642	43200	2.47901	43200	1.88562	43200	4.12754	43200	3.97907	43200	5.31175	43200	3.07098	43200	5.71832	43200	2.19087	43200	3.71498	43200	1.65015	43200	1.74737
43300	2.49317	43300	2.24408	43300	2.14309	43300	3.34143	43300	2.1712	43300	2.41992	43300	1.93556	43300	4.06255	43300	4.02215	43300	5.2826	43300	3.11461	43300	5.82757	43300	2.22296	43300	3.61472	43300	1.64388	43300	1.71142
43400	2.56208	43400	2.30645	43400	2.13259	43400	3.34395	43400	2.17774	43400	2.45605	43400	1.89888	43400	4.07296	43400	4.10918	43400	5.2921	43400	3.11385	43400	5.8173	43400	2.17181	43400	3.58378	43400	1.64194	43400	1.66297
43500	2.48274	43500	2.2949	43500	2.19968	43500	3.27308	43500	2.1949	43500	2.38277	43500	1.9353	43500	4.08087	43500	4.18343	43500	5.39263	43500	3.08416	43500	5.95289	43500	2.27524	43500	3.58035	43500	1.69876	43500	1.7689
43600	2.51469	43600	2.26457	43600	2.12591	43600	3.2594	43600	2.19835	43600	2.32349	43600	1.92485	43600	4.03601	43600	4.12587	43600	5.31911	43600	2.9802	43600	6.10172	43600	2.28096	43600	3.44787	43600	1.74704	43600	1.75683
43700	2.57785	43700	2.26966	43700	2.13926	43700	3.39586	43700	2.18413	43700	2.30549	43700	1.95622	43700	3.98644	43700	3.99346	43700	5.23166	43700	3.06739	43700	6.0621	43700	2.19513	43700	3.55824	43700	1.70643	43700	1.79537
43800	2.56144	43800	2.24021	43800	2.1951	43800	3.40678	43800	2.18302	43800	2.33821	43800	1.9693	43800	4.11511	43800	3.94325	43800	5.26432	43800	3.10254	43800	6.07109	43800	2.21405	43800	3.61555	43800	1.6689	43800	1.74667
43900	2.52179	43900	2.20579	43900	2.23005	43900	3.40805	43900	2.16655	43900	2.25905	43900	1.98158	43900	4.08733	43900	3.91073	43900	5.1532	43900	2.98907	43900	5.98227	43900	2.21742	43900	3.49659	43900	1.68273	43900	1.74878
44000	2.53158	44000	2.16044	44000	2.34819	44000	3.33629	44000	2.19189	44000	2.29082	44000	1.9752	44000	3.98332	44000	3.89041	44000	5.28372	44000	3.15739	44000	6.06461	44000	2.26384	44000	3.53271	44000	1.68511	44000	1.68054
44100	2.52649	44100	2.1659	44100	2.32754	44100	3.47382	44100	2.1461	44100	2.215	44100	1.9592	44100	3.9872	44100	3.98915	44100	5.23302	44100	3.21275	44100	6.0958	44100	2.25068	44100	3.54987	44100	1.69671	44100	1.57564
44200	2.48141	44200	2.22443	44200	2.25829	44200	3.55418	44200	2.14079	44200	2.19938	44200	1.90564	44200	3.99001	44200	4.04551	44200	5.25794	44200	3.24886	44200	6.21704	44200	2.25946	44200	3.49487	44200	1.74051	44200	1.65241
44300	2.50418	44300	2.23564	44300	2.20861	44300	3.40576	44300	2.18459	44300	2.16605	44300	1.86685	44300	3.94662	44300	4.08318	44300	5.33394	44300	3.18299	44300	6.35055	44300	2.24889	44300	3.48906	44300	1.74254	44300	1.54418
44400	2.55126	44400	2.3073	44400	2.24317	44400	3.42888	44400	2.16148	44400	2.16278	44400	1.91122	44400	4.02191	44400	4.06201	44400	5.28911	44400	3.18426	44400	6.30243	44400	2.24241	44400	3.44937	44400	1.70998	44400	1.5437
44500	2.53627	44500	2.3199	44500	2.25368	44500	3.46036	44500	2.11747	44500	2.18612	44500	1.90571	44500	3.99346	44500	4.02199	44500	5.21116	44500	3.18821	44500	6.37691	44500	2.2383	44500	3.52104	44500	1.71049	44500	1.47766
44600	2.52032	44600	2.30468	44600	2.19174	44600	3.4273	44600	2.17368	44600	2.15263	44600	1.98941	44600	4.11182	44600	4.03175	44600	5.24897	44600	3.25159	44600	6.43384	44600	2.22613	44600	3.41188	44600	1.74772	44600	1.4538
44700	2.43665	44700	2.23376	44700	2.13999	44700	3.35339	44700	2.16974	44700	2.22394	44700	1.91704	44700	4.24176	44700	4.02858	44700	5.25889	44700	3.35399	44700	6.38212	44700	2.21334	44700	3.35177	44700	1.79245	44700	1.45249
44800	2.45556	44800	2.22355	44800	2.12504	44800	3.37131	44800	2.11865	44800	2.2726	44800	1.98503	44800	4.17601	44800	4.14324	44800	5.21526	44800	3.34999	44800	6.34212	44800	2.23187	44800	3.32628	44800	1.77403	44800	1.38998
44900	2.47939	44900	2.19158	44900	2.11145	44900	3.39853	44900	2.10851	44900	2.27295	44900	1.97179	44900	4.14121	44900	4.40045	44900	5.12248	44900	3.41852	44900	6.46154	44900	2.19996	44900	3.34678	44900	1.73912	44900	1.46055
45000	2.5358	45000	2.19982	45000	2.13818	45000	3.35091	45000	2.11745	45000	2.22127	45000	2.01389	45000	4.06974	45000	4.3539	45000	5.07566	45000	3.6211	45000	6.50486	45000	2.24374	45000	3.40748	45000	1.76664	45000	1.55271
45100	2.47805	45100	2.23557	45100	2.16533	45100	3.38679	45100	2.16468	45100	2.31837	45100	1.93449	45100	3.9417	45100	4.34663	45100	4.94398	45100	3.59886	45100	6.54633	45100	2.1511	45100	3.4748	45100	1.74067	45100	1.5646
45200	2.49028	45200	2.20867	45200	2.29363	45200	3.42051	45200	2.14964	45200	2.32641	45200	1.92236	45200	3.98405	45200	4.39503	45200	4.98893	45200	3.54582	45200	6.56372	45200	2.17007	45200	3.43566	45200	1.78505	45200	1.55821
45300	2.60676	45300	2.35024	45300	2.28383	45300	3.44965	45300	2.1437	45300	2.35075	45300	1.86725	45300	3.89733	45300	4.25481	45300	5.09787	45300	3.50667	45300	6.50554	45300	2.17496	45300	3.34221	45300	1.73205	45300	1.58618
45400	2.52968	45400	2.30971	45400	2.23367	45400	3.37079	45400	2.08323	45400	2.42468	45400	1.84473	45400	4.03765	45400	4.29485	45400	5.04044	45400	3.50529	45400	6.27629	45400	2.24455	45400	3.36682	45400	1.71349	45400	1.60169
45500	2.58202	45500	2.25779	45500	2.2798	45500	3.30553	45500	2.12287	45500	2.41026	45500	1.8678	45500	4.11289	45500	4.21611	45500	5.05336	45500	3.38357	45500	6.2509	45500	2.35115	45500	3.30185	45500	1.72375	45500	1.56723
45600	2.55631	45600	2.35519	45600	2.24751	45600	3.32085	45600	2.15612	45600	2.59859	45600	1.86874	45600	4.31111	45600	4.36305	45600	5.10794	45600	3.32192	45600	6.23006	45600	2.28454	45600	3.26662	45600	1.65294	45600	1.62642
45700	2.57459	45700	2.34121	45700	2.25381	45700	3.3355	45700	2.10149	45700	2.62146	45700	1.87665	45700	4.30215	45700	4.44693	45700	5.08676	45700	3.33092	45700	5.97128	45700	2.33925	45700	3.26288	45700	1.71062	45700	1.67723
45800	2.6114	45800	2.33079	45800	2.24486	45800	3.3189	45800	2.18421	45800	2.51418	45800	1.85538	45800	4.4815	45800	4.45552	45800	4.99917	45800	3.23696	45800	5.95625	45800	2.31278	45800	3.31499	45800	1.78603	45800	1.6755
45900	2.43722	45900	2.50346	45900	2.3387	45900	3.3731	45900	2.12435	45900	2.57573	45900	1.91096	45900	4.45608	45900	4.6376	45900	4.95525	45900	3.34146	45900	5.96305	45900	2.36654	45900	3.36936	45900	1.79034	45900	1.70662
46000	2.4621	46000	2.46866	46000	2.28709	46000	3.31232	46000	2.14905	46000	2.67692	46000	1.91828	46000	4.51832	46000	4.55812	46000	4.97303	46000	3.37874	46000	6.09343	46000	2.31267	46000	3.29142	46000	1.69024	46000	1.72864
46100	2.43498	46100	2.47071	46100	2.27864	46100	3.40333	46100	2.18895	46100	2.7356	46100	1.94472	46100	4.47345	46100	4.70949	46100	5.04935	46100	3.52962	46100	6.15964	46100	2.36435	46100	3.37129	46100	1.72179	46100	1.71485
46200	2.47034	46200	2.51077	46200	2.25988	46200	3.38243	46200	2.20405	46200	2.66651	46200	1.94131	46200	4.34215	46200	4.50297	46200	4.84958	46200	3.55777	46200	6.03571	46200	2.3928	46200	3.34029	46200	1.74598	46200	1.68535
46300	2.43862	46300	2.44105	46300	2.27265	46300	3.33602	46300	2.19621	46300	2.62249	46300	1.91575	46300	4.1802	46300	4.57321	46300	4.91417	46300	3.79452	46300	6.02239	46300	2.35365	46300	3.30386	46300	1.69823	46300	1.84374
46400	2.49476	46400	2.51252	46400	2.24943	46400	3.3422	46400	2.20214	46400	2.75347	46400	1.93961	46400	4.05834	46400	4.45847	46400	4.90395	46400	3.83111	46400	6.10741	46400	2.30802	46400	3.32375	46400	1.73123	46400	1.76827
46500	2.5311	46500	2.45638	46500	2.16482	46500	3.28887	46500	2.22294	46500	2.63794	46500	1.92393	46500	4.16794	46500	4.38859	46500	4.9741	46500	3.87225	46500	6.12563	46500	2.28623	46500	3.27752	46500	1.80854	46500	1.82143
46600	2.51793	46600	2.4965	46600	2.17774	46600	3.31614	46600	2.23632	46600	2.63645	46600	1.8638	46600	4.174	46600	4.45806	46600	5.20295	46600	3.73784	46600	5.98817	46600	2.25011	46600	3.19114	46600	1.74563	46600	1.84243
46700	2.41395	46700	2.44524	46700	2.11551	46700	3.32052	46700	2.30667	46700	2.58465	46700	1.92491	46700	4.2142	46700	4.419	46700	5.07963	46700	3.92365	46700	6.10872	46700	2.26327	46700	3.19918	46700	1.7262	46700	1.87004
46800	2.38294	46800	2.38265	46800	2.16145	46800	3.38243	46800	2.30036	46800	2.50177	46800	1.96825	46800	4.43545	46800	4.47723	46800	5.04722	46800	3.98631	46800	6.24723	46800	2.1921	46800	3.29787	46800	1.73875	46800	1.80655
46900	2.37848	46900	2.37325	46900	2.10284	46900	3.38527	46900	2.3121	46900	2.59873	46900	1.96307	46900	4.26626	46900	4.59427	46900	5.0161	46900	4.00325	46900	6.2321	46900	2.1987	46900	3.29655	46900	1.7022	46900	1.71806
47000	2.42151	47000	2.39714	47000	2.1041	47000	3.27985	47000	2.29693	47000	2.53127	47000	1.93361	47000	4.28102	47000	4.52858	47000	4.98081	47000	3.85279	47000	6.22752	47000	2.15711	47000	3.22241	47000	1.73243	47000	1.77507
47100	2.41257	47100	2.31793	47100	2.03978	47100	3.29385	47100	2.28789	47100	2.59788	47100	1.94317	47100	4.37212	47100	4.6443	47100	4.87623	47100	3.81659	47100	6.3956	47100	2.21588	47100	3.2836	47100	1.7795	47100	1.72129
47200	2.34709	47200	2.34502	47200	2.12694	47200	3.27471	47200	2.39812	47200	2.63776	47200	1.88845	47200	4.06746	47200	4.76349	47200	4.86712	47200	3.80765	47200	6.29655	47200	2.16334	47200	3.3186	47200	1.77978	47200	1.74717
47300	2.37043	47300	2.31802	47300	2.09777	47300	3.33741	47300	2.36602	47300	2.69003	47300	1.95411	47300	4.3255	47300	4.68817	47300	4.80635	47300	3.79312	47300	6.40966	47300	2.16597	47300	3.36749	47300	1.82712	47300	1.73372
47400	2.3079	47400	2.2937	47400	2.044	47400	3.34918	47400	2.4085	47400	2.60604	47400	1.97144	47400	4.35111	47400	4.58323	47400	4.74473	47400	3.8368	47400	6.45814	47400	2.1122	47400	3.37913	47400	1.86609	47400	1.69434
47500	2.27478	47500	2.39819	47500	2.03818	47500	3.33793	47500	2.35811	47500	2.48589	47500	1.91992	47500	4.43384	47500	4.58242	47500	4.77659	47500	3.91523	47500	6.34715	47500	2.08068	47500	3.39474	47500	1.7321	47500	1.76407
47600	2.44002	47600	2.44731	47600	2.1153	47600	3.48456	47600	2.3398	47600	2.45837	47600	1.90053	47600	4.42857	47600	4.49107	47600	4.70302	47600	3.87315	47600	6.19357	47600	2.15081	47600	3.44666	47600	1.77085	47600	1.75691
47700	2.40477	47700	2.34955	47700	2.10823	47700	3.45363	47700	2.36903	47700	2.49079	47700	1.90459	47700	4.43534	47700	4.66244	47700	4.7642	47700	3.81949	47700	6.1036	47700	2.05564	47700	3.30985	47700	1.70066	47700	1.84553
47800	2.4437	47800	2.37874	47800	2.18465	47800	3.4235	47800	2.30944	47800	2.49761	47800	1.88748	47800	4.26977	47800	4.60463	47800	4.84653	47800	3.86719	47800	6.08074	47800	2.08026	47800	3.33716	47800	1.71863	47800	1.80501
47900	2.42756	47900	2.44187	47900	2.2548	47900	3.37522	47900	2.35858	47900	2.54936	47900	1.94151	47900	4.28993	47900	4.63721	47900	4.81036	47900	3.81979	47900	6.20047	47900	2.0904	47900	3.35797	47900	1.72578	47900	1.86708
48000	2.54185	48000	2.40482	48000	2.26928	48000	3.45217	48000	2.28337	48000	2.48487	48000	1.92739	48000	4.45084	48000	4.52316	48000	4.93345	48000	3.78558	48000	6.24296	48000	2.04809	48000	3.38307	48000	1.71566	48000	1.80172
48100	2.46164	48100	2.37257	48100	2.2607	48100	3.31949	48100	2.30268	48100	2.43845	48100	1.90305	48100	4.47646	48100	4.59758	48100	4.97316	48100	3.84141	48100	6.36695	48100	2.13528	48100	3.37137	48100	1.72581	48100	1.77485
48200	2.46151	48200	2.42571	48200	2.23727	48200	3.40775	48200	2.23096	48200	2.49802	48200	1.81961	48200	4.52618	48200	4.64413	48200	4.95443	48200	3.63059	48200	6.26906	48200	2.10759	48200	3.30776	48200	1.7323	48200	1.79042
48300	2.41926	48300	2.41623	48300	2.28134	48300	3.35322	48300	2.24633	48300	2.53931	48300	1.89136	48300	4.56691	48300	4.67236	48300	5.08293	48300	3.73973	48300	6.44495	48300	2.12545	48300	3.37988	48300	1.82276	48300	1.82578
48400	2.33097	48400	2.40969	48400	2.21204	48400	3.32542	48400	2.16158	48400	2.48963	48400	1.85661	48400	4.58468	48400	4.70508	48400	4.9968	48400	3.82502	48400	6.38789	48400	2.19895	48400	3.36761	48400	1.74125	48400	1.86019
48500	2.40451	48500	2.35967	48500	2.22482	48500	3.40273	48500	2.1467	48500	2.62505	48500	1.93542	48500	4.59822	48500	4.83308	48500	5.01382	48500	3.99363	48500	6.33638	48500	2.24075	48500	3.3358	48500	1.74928	48500	1.88769
48600	2.52707	48600	2.45595	48600	2.23387	48600	3.37958	48600	2.14664	48600	2.70941	48600	1.93962	48600	4.50872	48600	4.88379	48600	5.01662	48600	3.88874	48600	6.26229	48600	2.26845	48600	3.33366	48600	1.7267	48600	1.86257
48700	2.4806	48700	2.43098	48700	2.19278	48700	3.33789	48700	2.26864	48700	2.58668	48700	1.89994	48700	4.65763	48700	4.55329	48700	5.18983	48700	3.77835	48700	6.23909	48700	2.30234	48700	3.29108	48700	1.75525	48700	1.83772
48800	2.50832	48800	2.41264	48800	2.24797	48800	3.29997	48800	2.29914	48800	2.6061	48800	1.97232	48800	4.43377	48800	4.73048	48800	5.16487	48800	3.68034	48800	6.33849	48800	2.2297	48800	3.34531	48800	1.72813	48800	1.85267
48900	2.54348	48900	2.36842	48900	2.19549	48900	3.33121	48900	2.2427	48900	2.58868	48900	1.96356	48900	4.42779	48900	4.68875	48900	5.13688	48900	3.60941	48900	6.36648	48900	2.22396	48900	3.38367	48900	1.76102	48900	1.82295
49000	2.50234	49000	2.44312	49000	2.22829	49000	3.41157	49000	2.21307	49000	2.59834	49000	1.94031	49000	4.54086	49000	4.86827	49000	5.17867	49000	3.65614	49000	6.52746	49000	2.34306	49000	3.32316	49000	1.69043	49000	1.81462
49100	2.534	49100	2.41497	49100	2.13706	49100	3.41373	49100	2.25993	49100	2.55646	49100	1.99268	49100	4.42278	49100	4.83464	49100	5.25031	49100	3.73259	49100	6.3754	49100	2.34954	49100	3.41227	49100	1.73098	49100	1.78156
49200	2.50186	49200	2.36565	49200	2.14805	49200	3.43719	49200	2.27343	49200	2.60089	49200	1.98932	49200	4.45281	49200	4.95832	49200	5.2239	49200	3.70705	49200	6.50609	49200	2.27239	49200	3.32471	49200	1.72636	49200	1.88548
49300	2.42182	49300	2.40882	49300	2.21326	49300	3.48288	49300	2.31172	49300	2.65817	49300	1.9712	49300	4.37449	49300	4.98374	49300	5.22608	49300	3.7701	49300	6.51914	49300	2.22161	49300	3.33601	49300	1.72807	49300	1.88915
49400	2.44899	49400	2.47892	49400	2.24271	49400	3.55113	49400	2.32327	49400	2.59485	49400	1.93768	49400	4.39102	49400	5.03586	49400	5.22359	49400	3.85558	49400	6.64931	49400	2.31189	49400	3.39466	49400	1.70965	49400	1.97225
49500	2.46798	49500	2.45797	49500	2.21094	49500	3.44841	49500	2.34219	49500	2.54731	49500	1.96695	49500	4.4568	49500	4.9689	49500	5.21242	49500	4.00656	49500	6.61201	49500	2.2251	49500	3.39745	49500	1.80709	49500	1.95027
49600	2.4931	49600	2.5161	49600	2.23722	49600	3.35507	49600	2.31366	49600	2.58503	49600	2.02765	49600	4.40089	49600	4.81581	49600	5.51837	49600	4.00781	49600	6.514	49600	2.21626	49600	3.3491	49600	1.84527	49600	1.92088
49700	2.51384	49700	2.53584	49700	2.21335	49700	3.38435	49700	2.32018	49700	2.53855	49700	1.98594	49700	4.39935	49700	4.74376	49700	5.48135	49700	3.88954	49700	6.53229	49700	2.21754	49700	3.30308	49700	1.8008	49700	1.86722
49800	2.54491	49800	2.46465	49800	2.22581	49800	3.39699	49800	2.47348	49800	2.53131	49800	2.02631	49800	4.3524	49800	4.60053	49800	5.57122	49800	3.8196	49800	6.85154	49800	2.24425	49800	3.26942	49800	1.73675	49800	1.90793
49900	2.54397	49900	2.44958	49900	2.21566	49900	3.39705	49900	2.4048	49900	2.52276	49900	2.00567	49900	4.49222	49900	4.7385	49900	5.37355	49900	3.99086	49900	6.93651	49900	2.27976	49900	3.31581	49900	1.76951	49900	1.92683
50000	2.44395	50000	2.44634	50000	2.27565	50000	3.25375	50000	2.33171	50000	2.56345	50000	1.98787	50000	4.50978	50000	4.89733	50000	5.40813	50000	4.00124	50000	6.83852	50000	2.2618	50000	3.39065	50000	1.7801	50000	1.87339
50100	2.50922	50100	2.46777	50100	2.30401	50100	3.2359	50100	2.36882	50100	2.52425	50100	2.0116	50100	4.54233	50100	4.75308	50100	5.29557	50100	4.12914	50100	6.74828	50100	2.28788	50100	3.35093	50100	1.84677	50100	1.85931
50200	2.46384	50200	2.48965	50200	2.24008	50200	3.21251	50200	2.28648	50200	2.5484	50200	2.00013	50200	4.44532	50200	4.66227	50200	5.42889	50200	4.09298	50200	6.727	50200	2.29168	50200	3.34832	50200	1.81581	50200	1.8844
50300	2.52722	50300	2.41385	50300	2.1765	50300	3.29902	50300	2.24229	50300	2.5584	50300	2.04427	50300	4.43547	50300	4.78563	50300	5.27836	50300	4.05724	50300	6.77819	50300	2.22777	50300	3.31151	50300	1.79979	50300	1.84727
50400	2.60424	50400	2.46138	50400	2.16247	50400	3.2325	50400	2.22905	50400	2.49908	50400	2.01287	50400	4.49282	50400	4.86061	50400	5.20361	50400	4.06726	50400	6.91232	50400	2.3	50400	3.41453	50400	1.84248	50400	1.84135
50500	2.63777	50500	2.41902	50500	2.1788	50500	3.27925	50500	2.21742	50500	2.51065	50500	2.05437	50500	4.41856	50500	4.94898	50500	5.28327	50500	4.16983	50500	6.85296	50500	2.31825	50500	3.47248	50500	1.87996	50500	1.78039
50600	2.67274	50600	2.39918	50600	2.17895	50600	3.24587	50600	2.31324	50600	2.47593	50600	2.04209	50600	4.42527	50600	4.79879	50600	5.30412	50600	4.06263	50600	6.76009	50600	2.32896	50600	3.41101	50600	1.81106	50600	1.83976
50700	2.7224	50700	2.38552	50700	2.17483	50700	3.22299	50700	2.25971	50700	2.54819	50700	2.02404	50700	4.41553	50700	4.70036	50700	5.31793	50700	4.09387	50700	6.82585	50700	2.27371	50700	3.49789	50700	1.82054	50700	1.84581
50800	2.71743	50800	2.39867	50800	2.19584	50800	3.1995	50800	2.2865	50800	2.5384	50800	2.02129	50800	4.51039	50800	4.73932	50800	5.50051	50800	3.92472	50800	6.84753	50800	2.1519	50800	3.43896	50800	1.73854	50800	1.84477
50900	2.67377	50900	2.30654	50900	2.19214	50900	3.21275	50900	2.32387	50900	2.5005	50900	2.01422	50900	4.36622	50900	4.59999	50900	5.53865	50900	3.87624	50900	6.96045	50900	2.25909	50900	3.4604	50900	1.68473	50900	1.74955
51000	2.68975	51000	2.31535	51000	2.25947	51000	3.23507	51000	2.30925	51000	2.48148	51000	1.97722	51000	4.53424	51000	4.46054	51000	5.60546	51000	3.94593	51000	6.70606	51000	2.19873	51000	3.40571	51000	1.73505	51000	1.79358
51100	2.62264	51100	2.35092	51100	2.17926	51100	3.21223	51100	2.40901	51100	2.50531	51100	1.91377	51100	4.66429	51100	4.48689	51100	5.64146	51100	4.0212	51100	6.75479	51100	2.23715	51100	3.4109	51100	1.7606	51100	1.73528
51200	2.62219	51200	2.39017	51200	2.17628	51200	3.16348	51200	2.40326	51200	2.42645	51200	1.93062	51200	4.71961	51200	4.54034	51200	5.61053	51200	3.97754	51200	6.85153	51200	2.2402	51200	3.38563	51200	1.70153	51200	1.70908
51300	2.68506	51300	2.44583	51300	2.23508	51300	3.19493	51300	2.33909	51300	2.3732	51300	1.90363	51300	4.88059	51300	4.53107	51300	5.67003	51300	4.04729	51300	6.68283	51300	2.31163	51300	3.33015	51300	1.70655	51300	1.72948
51400	2.65326	51400	2.56977	51400	2.15217	51400	3.19665	51400	2.35931	51400	2.32335	51400	1.92298	51400	4.88574	51400	4.48117	51400	5.74907	51400	4.03767	51400	6.70736	51400	2.21042	51400	3.36023	51400	1.69465	51400	1.68569
51500	2.63017	51500	2.48723	51500	2.22416	51500	3.24732	51500	2.43891	51500	2.35812	51500	1.96986	51500	5.0077	51500	4.47042	51500	5.78665	51500	3.95356	51500	6.84267	51500	2.19484	51500	3.45387	51500	1.73056	51500	1.77063
51600	2.71939	51600	2.49169	51600	2.25458	51600	3.25006	51600	2.39286	51600	2.47605	51600	1.95643	51600	4.98141	51600	4.471	51600	5.65332	51600	4.07296	51600	6.62361	51600	2.22496	51600	3.50489	51600	1.83332	51600	1.76612
51700	2.62343	51700	2.44117	51700	2.20981	51700	3.28816	51700	2.34437	51700	2.42395	51700	1.89754	51700	5.04039	51700	4.63637	51700	5.83117	51700	4.16466	51700	6.73809	51700	2.20894	51700	3.53133	51700	1.79247	51700	1.73096
51800	2.63206	51800	2.43745	51800	2.26588	51800	3.30778	51800	2.33702	51800	2.43022	51800	1.9076	51800	5.00803	51800	4.65894	51800	5.7909	51800	4.15345	51800	6.99858	51800	2.24929	51800	3.50281	51800	1.76649	51800	1.76892
51900	2.74198	51900	2.44565	51900	2.14331	51900	3.32254	51900	2.36988	51900	2.46962	51900	1.95646	51900	4.99118	51900	4.85541	51900	5.78118	51900	4.37821	51900	6.98504	51900	2.19266	51900	3.47198	51900	1.71769	51900	1.70977
52000	2.67883	52000	2.44034	52000	2.17904	52000	3.32324	52000	2.37398	52000	2.42188	52000	1.96144	52000	5.02104	52000	4.80846	52000	5.77509	52000	4.31209	52000	7.09227	52000	2.15704	52000	3.47327	52000	1.67664	52000	1.69231
52100	2.62469	52100	2.4757	52100	2.20419	52100	3.37972	52100	2.41731	52100	2.46188	52100	1.8953	52100	5.1352	52100	4.90278	52100	5.70473	52100	4.18201	52100	7.05264	52100	2.21291	52100	3.51275	52100	1.67826	52100	1.78655
52200	2.6448	52200	2.50801	52200	2.20172	52200	3.35574	52200	2.45691	52200	2.48764	52200	1.92803	52200	5.03896	52200	4.85645	52200	5.75081	52200	4.16006	52200	7.01659	52200	2.21072	52200	3.4546	52200	1.67734	52200	1.76179
52300	2.6187	52300	2.49171	52300	2.20548	52300	3.32476	52300	2.43958	52300	2.44527	52300	1.97748	52300	5.02255	52300	4.87217	52300	5.7684	52300	4.24283	52300	6.93206	52300	2.24562	52300	3.45727	52300	1.75127	52300	1.68942
52400	2.60293	52400	2.44167	52400	2.22276	52400	3.42038	52400	2.49704	52400	2.45964	52400	1.95248	52400	5.12486	52400	5.01176	52400	5.72064	52400	4.23412	52400	6.92516	52400	2.19351	52400	3.53744	52400	1.76248	52400	1.66995
52500	2.58931	52500	2.60728	52500	2.17882	52500	3.40427	52500	2.41024	52500	2.46809	52500	1.99426	52500	5.07968	52500	4.94239	52500	5.80908	52500	4.26793	52500	6.85948	52500	2.21115	52500	3.47629	52500	1.72022	52500	1.68003
52600	2.66157	52600	2.57401	52600	2.18577	52600	3.46845	52600	2.41299	52600	2.47442	52600	1.98651	52600	4.98667	52600	4.93798	52600	5.82519	52600	4.17267	52600	6.99604	52600	2.10313	52600	3.49688	52600	1.74403	52600	1.67204
52700	2.73864	52700	2.57831	52700	2.19261	52700	3.53115	52700	2.40934	52700	2.43408	52700	1.99189	52700	4.94281	52700	4.97621	52700	5.71353	52700	4.13579	52700	6.9908	52700	2.24215	52700	3.61635	52700	1.76644	52700	1.68295
52800	2.73381	52800	2.62543	52800	2.17868	52800	3.45932	52800	2.45034	52800	2.4144	52800	1.96955	52800	4.97915	52800	4.88285	52800	5.68721	52800	4.12601	52800	7.16016	52800	2.18154	52800	3.59538	52800	1.69538	52800	1.73462
52900	2.7013	52900	2.59386	52900	2.21753	52900	3.45608	52900	2.4728	52900	2.34627	52900	1.92269	52900	5.02452	52900	4.89108	52900	5.61141	52900	4.21506	52900	7.03836	52900	2.16291	52900	3.61475	52900	1.65744	52900	1.69522
53000	2.71513	53000	2.55301	53000	2.24262	53000	3.44478	53000	2.40945	53000	2.33815	53000	1.86282	53000	5.04875	53000	4.9512	53000	5.54995	53000	4.21974	53000	6.94452	53000	2.13906	53000	3.64858	53000	1.73742	53000	1.71202
53100	2.70062	53100	2.52368	53100	2.11108	53100	3.43562	53100	2.62407	53100	2.39292	53100	1.86269	53100	5.17355	53100	5.06358	53100	5.66045	53100	4.29544	53100	6.95099	53100	2.22777	53100	3.51693	53100	1.73802	53100	1.74931
53200	2.73528	53200	2.50671	53200	2.12327	53200	3.36923	53200	2.52458	53200	2.45274	53200	1.94658	53200	5.05804	53200	4.95206	53200	5.79766	53200	4.23507	53200	6.94292	53200	2.15796	53200	3.45265	53200	1.71918	53200	1.72889
53300	2.7252	53300	2.56151	53300	2.1505	53300	3.38437	53300	2.61299	53300	2.42543	53300	1.94002	53300	5.1813	53300	5.00331	53300	5.88897	53300	3.96787	53300	6.87726	53300	2.09111	53300	3.48857	53300	1.65885	53300	1.75122
53400	2.73497	53400	2.57662	53400	2.19882	53400	3.37078	53400	2.62898	53400	2.50922	53400	1.90094	53400	5.13583	53400	4.99052	53400	5.83053	53400	3.92569	53400	6.96161	53400	2.07438	53400	3.55883	53400	1.59979	53400	1.68562
53500	2.69035	53500	2.58153	53500	2.20607	53500	3.43662	53500	2.62823	53500	2.54744	53500	1.88424	53500	5.21107	53500	4.98918	53500	5.90018	53500	4.14782	53500	6.90746	53500	2.16287	53500	3.5776	53500	1.6326	53500	1.63225
53600	2.6615	53600	2.65151	53600	2.21367	53600	3.36831	53600	2.52576	53600	2.6249	53600	1.90609	53600	5.17254	53600	5.02315	53600	5.82428	53600	4.03547	53600	6.86883	53600	2.16395	53600	3.57486	53600	1.67224	53600	1.5909
53700	2.69837	53700	2.5833	53700	2.27421	53700	3.38496	53700	2.52311	53700	2.66487	53700	1.91461	53700	5.26383	53700	4.88358	53700	5.96591	53700	4.11251	53700	6.86179	53700	2.21396	53700	3.47736	53700	1.66757	53700	1.69159
53800	2.7248	53800	2.57634	53800	2.22307	53800	3.42133	53800	2.54365	53800	2.68089	53800	1.87551	53800	5.3058	53800	4.68208	53800	5.86123	53800	4.04912	53800	6.78256	53800	2.14568	53800	3.51348	53800	1.62517	53800	1.62136
53900	2.67802	53900	2.57728	53900	2.20415	53900	3.43338	53900	2.50285	53900	2.71953	53900	1.91316	53900	5.32459	53900	4.71469	53900	5.80951	53900	3.98161	53900	6.68235	53900	2.07585	53900	3.51932	53900	1.6895	53900	1.64856
54000	2.6713	54000	2.56875	54000	2.15862	54000	3.36416	54000	2.49368	54000	2.60467	54000	1.84767	54000	5.15701	54000	4.64812	54000	5.58797	54000	4.01884	54000	6.65139	54000	2.15213	54000	3.45682	54000	1.70948	54000	1.74507
54100	2.67652	54100	2.47135	54100	2.25207	54100	3.31965	54100	2.38799	54100	2.57152	54100	1.87953	54100	5.35581	54100	4.54582	54100	5.65129	54100	3.94431	54100	6.59396	54100	2.16114	54100	3.45707	54100	1.73985	54100	1.80242
54200	2.61345	54200	2.53785	54200	2.24594	54200	3.2203	54200	2.37414	54200	2.62605	54200	1.95555	54200	5.23571	54200	4.64005	54200	5.69765	54200	4.09693	54200	6.54857	54200	2.25693	54200	3.44718	54200	1.71545	54200	1.79393
54300	2.66556	54300	2.58723	54300	2.26951	54300	3.32503	54300	2.37947	54300	2.62085	54300	1.97659	54300	5.44916	54300	4.71452	54300	5.73847	54300	4.04576	54300	6.67851	54300	2.21675	54300	3.45062	54300	1.76085	54300	1.74267
54400	2.65181	54400	2.5833	54400	2.30495	54400	3.35761	54400	2.45654	54400	2.54564	54400	1.98818	54400	5.58814	54400	4.81283	54400	5.78085	54400	4.04382	54400	6.72563	54400	2.15321	54400	3.47199	54400	1.79442	54400	1.75918
54500	2.64453	54500	2.46431	54500	2.30768	54500	3.25458	54500	2.42593	54500	2.61154	54500	1.94616	54500	5.43116	54500	4.72773	54500	6.08065	54500	4.08709	54500	6.86345	54500	2.07938	54500	3.52803	54500	1.73258	54500	1.74269
54600	2.61975	54600	2.46393	54600	2.32233	54600	3.26627	54600	2.48011	54600	2.60121	54600	1.95099	54600	5.74321	54600	4.66064	54600	5.9429	54600	4.05865	54600	6.9705	54600	2.03272	54600	3.55146	54600	1.72678	54600	1.7136
54700	2.68768	54700	2.55182	54700	2.27688	54700	3.2596	54700	2.40373	54700	2.5982	54700	1.95823	54700	5.73861	54700	4.68249	54700	5.90131	54700	3.98673	54700	6.98126	54700	2.07197	54700	3.58721	54700	1.71175	54700	1.76307
54800	2.61495	54800	2.59438	54800	2.3101	54800	3.27242	54800	2.34005	54800	2.5911	54800	1.91479	54800	5.74538	54800	4.87905	54800	5.90395	54800	4.01303	54800	6.96372	54800	2.08929	54800	3.56691	54800	1.6444	54800	1.79915
54900	2.64827	54900	2.6007	54900	2.36	54900	3.29455	54900	2.44247	54900	2.5733	54900	1.91576	54900	5.84742	54900	4.90466	54900	5.89752	54900	4.08951	54900	6.95247	54900	2.06704	54900	3.57356	54900	1.62944	54900	1.80548
55000	2.63599	55000	2.60622	55000	2.38649	55000	3.27413	55000	2.41789	55000	2.63348	55000	1.84504	55000	6.00598	55000	4.79289	55000	5.7868	55000	4.044	55000	7.101	55000	2.08275	55000	3.64806	55000	1.64307	55000	1.77018
55100	2.54705	55100	2.69589	55100	2.32834	55100	3.35998	55100	2.35343	55100	2.60839	55100	1.82953	55100	5.95508	55100	4.94995	55100	6.00391	55100	4.08868	55100	7.24505	55100	2.0544	55100	3.51059	55100	1.6203	55100	1.80686
55200	2.58607	55200	2.62004	55200	2.31487	55200	3.34275	55200	2.31766	55200	2.56289	55200	1.83471	55200	6.15311	55200	4.89783	55200	5.95702	55200	4.12835	55200	7.14365	55200	2.14772	55200	3.52145	55200	1.55852	55200	1.84812
55300	2.59509	55300	2.55878	55300	2.34362	55300	3.18722	55300	2.33365	55300	2.54776	55300	1.7798	55300	6.18525	55300	4.77015	55300	5.96836	55300	4.14528	55300	7.22175	55300	2.17195	55300	3.53841	55300	1.7129	55300	1.8197
55400	2.68944	55400	2.54692	55400	2.38395	55400	3.27224	55400	2.37731	55400	2.47666	55400	1.78952	55400	6.02809	55400	4.83618	55400	5.94996	55400	4.1046	55400	6.91225	55400	2.13606	55400	3.41239	55400	1.71658	55400	1.78202
55500	2.53986	55500	2.59461	55500	2.41905	55500	3.29603	55500	2.3309	55500	2.60972	55500	1.70236	55500	5.94143	55500	4.90729	55500	5.91647	55500	4.1501	55500	6.81875	55500	2.19076	55500	3.43868	55500	1.64342	55500	1.80363
55600	2.63794	55600	2.58125	55600	2.40537	55600	3.27654	55600	2.33867	55600	2.47618	55600	1.72481	55600	5.90361	55600	5.11541	55600	5.80884	55600	4.04297	55600	7.0033	55600	2.17742	55600	3.41575	55600	1.6407	55600	1.70344
55700	2.56604	55700	2.5477	55700	2.33996	55700	3.33903	55700	2.24126	55700	2.56769	55700	1.76326	55700	5.81157	55700	5.05382	55700	5.60648	55700	4.08701	55700	7.03111	55700	2.16789	55700	3.4184	55700	1.68191	55700	1.69553
55800	2.62055	55800	2.54114	55800	2.39171	55800	3.39427	55800	2.27948	55800	2.55634	55800	1.73264	55800	5.9345	55800	5.07063	55800	5.571	55800	4.06176	55800	7.1194	55800	2.21818	55800	3.32009	55800	1.64186	55800	1.72765
55900	2.66257	55900	2.61227	55900	2.37802	55900	3.31805	55900	2.29263	55900	2.46102	55900	1.70823	55900	5.73752	55900	4.97375	55900	5.5578	55900	4.10796	55900	7.21054	55900	2.15123	55900	3.36526	55900	1.68024	55900	1.72461
56000	2.70389	56000	2.63529	56000	2.49158	56000	3.2339	56000	2.21732	56000	2.4636	56000	1.68304	56000	5.77916	56000	5.23543	56000	5.68743	56000	4.17138	56000	7.3565	56000	2.16801	56000	3.3578	56000	1.62961	56000	1.73591
56100	2.62702	56100	2.58733	56100	2.42314	56100	3.29349	56100	2.3181	56100	2.52292	56100	1.69659	56100	5.74502	56100	5.14517	56100	5.61812	56100	4.04561	56100	7.32169	56100	2.12363	56100	3.34074	56100	1.68053	56100	1.74916
56200	2.63718	56200	2.60404	56200	2.3257	56200	3.20767	56200	2.24052	56200	2.51319	56200	1.7424	56200	5.77122	56200	5.24497	56200	5.72047	56200	3.97816	56200	7.37716	56200	2.192	56200	3.33214	56200	1.72296	56200	1.74979
56300	2.70596	56300	2.57843	56300	2.30405	56300	3.22497	56300	2.24954	56300	2.56275	56300	1.72638	56300	5.61166	56300	5.17213	56300	5.82212	56300	3.97327	56300	7.41823	56300	2.29251	56300	3.26691	56300	1.70825	56300	1.80596
56400	2.76419	56400	2.625	56400	2.29911	56400	3.25551	56400	2.15248	56400	2.54247	56400	1.69557	56400	5.84155	56400	5.34661	56400	5.74263	56400	4.01601	56400	7.3552	56400	2.23533	56400	3.28231	56400	1.68602	56400	1.76883
56500	2.74907	56500	2.56439	56500	2.36412	56500	3.26184	56500	2.1353	56500	2.46519	56500	1.71629	56500	5.78273	56500	5.25908	56500	5.84405	56500	4.08295	56500	7.38089	56500	2.23602	56500	3.24518	56500	1.67396	56500	1.76566
56600	2.76447	56600	2.54792	56600	2.24331	56600	3.22125	56600	2.18893	56600	2.44274	56600	1.71902	56600	5.77769	56600	5.40477	56600	5.70681	56600	3.99742	56600	7.51138	56600	2.27916	56600	3.32332	56600	1.58154	56600	1.82132
56700	2.67421	56700	2.5047	56700	2.33839	56700	3.30268	56700	2.14709	56700	2.37726	56700	1.62987	56700	6.03813	56700	5.4556	56700	5.72947	56700	3.93573	56700	7.57856	56700	2.18026	56700	3.23872	56700	1.61049	56700	1.84948
56800	2.68683	56800	2.53723	56800	2.30696	56800	3.21988	56800	2.13078	56800	2.34344	56800	1.7173	56800	5.99622	56800	5.56563	56800	5.72801	56800	4.0136	56800	7.71298	56800	2.24192	56800	3.19315	56800	1.72869	56800	1.78436
56900	2.74071	56900	2.65245	56900	2.3239	56900	3.22728	56900	2.14337	56900	2.24925	56900	1.78155	56900	5.93724	56900	5.44793	56900	5.84471	56900	4.04692	56900	7.66082	56900	2.33299	56900	3.24409	56900	1.73788	56900	1.79972
57000	2.69554	57000	2.71426	57000	2.32888	57000	3.24564	57000	2.13498	57000	2.32656	57000	1.82449	57000	6.02223	57000	5.62	57000	5.87271	57000	4.04591	57000	7.66523	57000	2.17791	57000	3.21531	57000	1.7137	57000	1.75606
57100	2.68446	57100	2.8333	57100	2.33414	57100	3.33713	57100	2.1418	57100	2.3911	57100	1.84747	57100	6.04483	57100	5.44384	57100	5.84425	57100	4.14139	57100	7.76855	57100	2.15026	57100	3.21019	57100	1.76733	57100	1.85286
57200	2.63067	57200	2.82282	57200	2.31868	57200	3.3342	57200	2.15028	57200	2.42205	57200	1.83623	57200	6.35511	57200	5.55506	57200	5.99657	57200	4.1797	57200	7.81525	57200	2.09885	57200	3.25697	57200	1.75186	57200	1.80946
57300	2.67638	57300	2.76246	57300	2.33629	57300	3.43063	57300	2.08692	57300	2.41787	57300	1.80008	57300	6.14767	57300	5.48994	57300	5.93208	57300	4.03411	57300	8.07679	57300	2.21865	57300	3.25336	57300	1.71793	57300	1.77304
57400	2.63831	57400	2.80081	57400	2.29714	57400	3.43395	57400	2.10954	57400	2.36695	57400	1.77395	57400	6.17683	57400	5.40098	57400	6.08422	57400	4.19547	57400	7.9684	57400	2.17974	57400	3.23234	57400	1.58851	57400	1.82881
57500	2.64477	57500	2.74642	57500	2.2884	57500	3.38552	57500	2.15073	57500	2.4474	57500	1.78971	57500	6.25654	57500	5.34948	57500	5.97213	57500	4.31117	57500	7.91487	57500	2.25422	57500	3.2137	57500	1.63846	57500	1.79389
57600	2.58946	57600	2.7594	57600	2.30239	57600	3.39093	57600	2.15771	57600	2.40471	57600	1.84102	57600	6.25856	57600	5.48379	57600	5.8759	57600	4.5168	57600	7.8395	57600	2.22707	57600	3.29434	57600	1.62105	57600	1.79033
57700	2.6146	57700	2.68906	57700	2.3512	57700	3.30535	57700	2.12704	57700	2.36296	57700	1.87409	57700	6.11734	57700	5.5518	57700	6.04099	57700	4.51026	57700	7.93881	57700	2.20694	57700	3.16851	57700	1.65334	57700	1.80827
57800	2.61935	57800	2.63426	57800	2.33128	57800	3.24438	57800	2.17925	57800	2.38208	57800	1.87442	57800	6.10376	57800	5.62137	57800	6.05674	57800	4.44752	57800	7.79483	57800	2.22009	57800	3.20689	57800	1.64869	57800	1.74279
57900	2.64579	57900	2.7488	57900	2.3354	57900	3.2607	57900	2.11197	57900	2.38897	57900	1.87827	57900	6.01353	57900	5.5424	57900	5.99126	57900	4.56025	57900	7.82021	57900	2.21347	57900	3.10717	57900	1.678	57900	1.81811
58000	2.69441	58000	2.70532	58000	2.42044	58000	3.28493	58000	2.12276	58000	2.42716	58000	1.85796	58000	6.02512	58000	5.61371	58000	5.99453	58000	4.60087	58000	7.83543	58000	2.2002	58000	3.18066	58000	1.70149	58000	1.80203
58100	2.64698	58100	2.76019	58100	2.32434	58100	3.35004	58100	2.14763	58100	2.4284	58100	1.92737	58100	6.06521	58100	5.5242	58100	5.98223	58100	4.65523	58100	7.793	58100	2.25704	58100	3.21035	58100	1.71797	58100	1.80374
58200	2.55932	58200	2.75431	58200	2.36311	58200	3.3981	58200	2.19805	58200	2.40675	58200	1.85538	58200	6.23496	58200	5.45311	58200	6.00534	58200	4.57602	58200	7.89418	58200	2.34449	58200	3.15118	58200	1.75135	58200	1.76332
58300	2.55355	58300	2.7688	58300	2.32836	58300	3.3503	58300	2.11679	58300	2.45729	58300	1.82626	58300	6.39716	58300	5.40793	58300	6.02644	58300	4.47963	58300	7.97251	58300	2.22976	58300	3.27458	58300	1.72342	58300	1.78835
58400	2.55262	58400	2.84006	58400	2.33851	58400	3.35838	58400	2.11106	58400	2.47032	58400	1.85979	58400	6.31615	58400	5.36732	58400	6.05363	58400	4.53601	58400	8.05715	58400	2.20875	58400	3.29794	58400	1.68357	58400	1.81062
58500	2.53123	58500	2.77034	58500	2.26959	58500	3.30309	58500	2.18593	58500	2.44533	58500	1.84998	58500	6.18731	58500	5.29549	58500	5.96652	58500	4.61143	58500	8.06906	58500	2.20988	58500	3.32175	58500	1.70264	58500	1.85071
58600	2.60729	58600	2.81281	58600	2.3782	58600	3.38065	58600	2.21967	58600	2.38232	58600	1.8248	58600	6.3887	58600	5.35666	58600	6.01059	58600	4.55947	58600	8.08835	58600	2.23795	58600	3.31688	58600	1.66869	58600	1.84441
58700	2.66421	58700	2.7852	58700	2.38108	58700	3.40148	58700	2.25743	58700	2.36852	58700	1.78856	58700	6.24221	58700	5.38353	58700	6.06034	58700	4.54129	58700	8.23646	58700	2.33182	58700	3.243	58700	1.69637	58700	1.81956
58800	2.64523	58800	2.69565	58800	2.43931	58800	3.35073	58800	2.21034	58800	2.31859	58800	1.83169	58800	6.16252	58800	5.39803	58800	6.06172	58800	4.54302	58800	8.29179	58800	2.29721	58800	3.21548	58800	1.62507	58800	1.82381
58900	2.61451	58900	2.75302	58900	2.46026	58900	3.38134	58900	2.20212	58900	2.40251	58900	1.83255	58900	6.2498	58900	5.3913	58900	6.18646	58900	4.55516	58900	8.40356	58900	2.32136	58900	3.21384	58900	1.68049	58900	1.83814
59000	2.61205	59000	2.8195	59000	2.5014	59000	3.38221	59000	2.24462	59000	2.3564	59000	1.85774	59000	6.26993	59000	5.36619	59000	6.13318	59000	4.62224	59000	8.28674	59000	2.30764	59000	3.25994	59000	1.63086	59000	1.77479
59100	2.58209	59100	2.83247	59100	2.45971	59100	3.32902	59100	2.18305	59100	2.31354	59100	1.84905	59100	6.38495	59100	5.44852	59100	6.11931	59100	4.63257	59100	8.4436	59100	2.31475	59100	3.29275	59100	1.66941	59100	1.85359
59200	2.61683	59200	2.73479	59200	2.52654	59200	3.36301	59200	2.21497	59200	2.34418	59200	1.81823	59200	6.57024	59200	5.47222	59200	5.97972	59200	4.61419	59200	8.5769	59200	2.33662	59200	3.27756	59200	1.65746	59200	1.84295
59300	2.66432	59300	2.79234	59300	2.5296	59300	3.36811	59300	2.2565	59300	2.40553	59300	1.84399	59300	6.55638	59300	5.4244	59300	5.92542	59300	4.43433	59300	8.47337	59300	2.35634	59300	3.26307	59300	1.69454	59300	1.88886
59400	2.70013	59400	2.7949	59400	2.47115	59400	3.34335	59400	2.23637	59400	2.34524	59400	1.80051	59400	6.50212	59400	5.40751	59400	5.86817	59400	4.39591	59400	8.71429	59400	2.28995	59400	3.18603	59400	1.69048	59400	1.83291
59500	2.68918	59500	2.77863	59500	2.43808	59500	3.36951	59500	2.21143	59500	2.42615	59500	1.82008	59500	6.49733	59500	5.46521	59500	5.81313	59500	4.3929	59500	8.6314	59500	2.34074	59500	3.19268	59500	1.76835	59500	1.78666
59600	2.67445	59600	2.70534	59600	2.45871	59600	3.34332	59600	2.32762	59600	2.45256	59600	1.7823	59600	6.56091	59600	5.6092	59600	5.84531	59600	4.3371	59600	8.87004	59600	2.28454	59600	3.19627	59600	1.7178	59600	1.79048
59700	2.69904	59700	2.64708	59700	2.54257	59700	3.3403	59700	2.34224	59700	2.55985	59700	1.76063	59700	6.61505	59700	5.54078	59700	5.86625	59700	4.40016	59700	8.88713	59700	2.25351	59700	3.16208	59700	1.73872	59700	1.79446
59800	2.68597	59800	2.6732	59800	2.50225	59800	3.40758	59800	2.30264	59800	2.44064	59800	1.81158	59800	6.61884	59800	5.38665	59800	5.88235	59800	4.49604	59800	8.82945	59800	2.27398	59800	3.12353	59800	1.69704	59800	1.88409
59900	2.68539	59900	2.75205	59900	2.49183	59900	3.42627	59900	2.30532	59900	2.4458	59900	1.71892	59900	6.86815	59900	5.35516	59900	5.9563	59900	4.37376	59900	8.81202	59900	2.25651	59900	3.13168	59900	1.71416	59900	1.78369
60000	2.67637	60000	2.78113	60000	2.51399	60000	3.45187	60000	2.22938	60000	2.48803	60000	1.75164	60000	6.82813	60000	5.45233	60000	5.97872	60000	4.16047	60000	9.09379	60000	2.33479	60000	3.19619	60000	1.6849	60000	1.75275
60100	2.6705	60100	2.74573	60100	2.46468	60100	3.43688	60100	2.20913	60100	2.54363	60100	1.79565	60100	6.87604	60100	5.49614	60100	5.79092	60100	4.26093	60100	9.02518	60100	2.36751	60100	3.17734	60100	1.73006	60100	1.75684
60200	2.71584	60200	2.6818	60200	2.38475	60200	3.55906	60200	2.19326	60200	2.64449	60200	1.85534	60200	6.90054	60200	5.35217	60200	5.74498	60200	4.26833	60200	9.00129	60200	2.32826	60200	3.17151	60200	1.65535	60200	1.70383
60300	2.64428	60300	2.72307	60300	2.30634	60300	3.43711	60300	2.22396	60300	2.60961	60300	1.83834	60300	6.70513	60300	5.34832	60300	5.75138	60300	4.26559	60300	9.00236	60300	2.28136	60300	3.18823	60300	1.71406	60300	1.64793
60400	2.58393	60400	2.64934	60400	2.39199	60400	3.44709	60400	2.19236	60400	2.68165	60400	1.87978	60400	6.69058	60400	5.41498	60400	5.70297	60400	4.15316	60400	9.1094	60400	2.27927	60400	3.17059	60400	1.79465	60400	1.7108
60500	2.59446	60500	2.5615	60500	2.46431	60500	3.46857	60500	2.22635	60500	2.60782	60500	1.82845	60500	6.81818	60500	5.31351	60500	5.78068	60500	4.21542	60500	9.31047	60500	2.21512	60500	3.14978	60500	1.83301	60500	1.75844
60600	2.59198	60600	2.56711	60600	2.38023	60600	3.35504	60600	2.18214	60600	2.784	60600	1.89285	60600	6.70537	60600	5.35749	60600	5.9914	60600	4.18643	60600	9.26537	60600	2.38134	60600	3.22469	60600	1.79343	60600	1.84594
60700	2.57582	60700	2.61853	60700	2.33861	60700	3.45808	60700	2.07895	60700	2.78388	60700	1.90628	60700	6.59708	60700	5.19814	60700	6.1066	60700	4.15224	60700	9.3117	60700	2.37295	60700	3.22613	60700	1.76173	60700	1.81646
60800	2.54214	60800	2.56353	60800	2.37978	60800	3.38504	60800	2.11108	60800	2.73859	60800	1.92816	60800	6.6643	60800	5.16228	60800	6.07077	60800	4.12033	60800	9.37274	60800	2.40426	60800	3.12844	60800	1.7792	60800	1.90416
60900	2.59329	60900	2.55815	60900	2.3863	60900	3.37418	60900	2.04519	60900	2.71177	60900	1.90289	60900	6.59457	60900	5.36076	60900	5.95785	60900	4.20191	60900	9.22663	60900	2.4085	60900	3.15342	60900	1.8401	60900	1.74752
61000	2.53937	61000	2.51258	61000	2.40699	61000	3.41371	61000	2.03598	61000	2.74881	61000	1.90786	61000	6.60493	61000	5.3547	61000	6.01675	61000	4.28208	61000	9.12495	61000	2.36492	61000	3.20099	61000	1.90183	61000	1.74803
61100	2.61982	61100	2.5939	61100	2.44183	61100	3.42107	61100	1.96247	61100	2.77554	61100	1.94502	61100	6.52163	61100	5.26366	61100	5.93011	61100	4.34467	61100	9.17301	61100	2.4015	61100	3.29168	61100	1.85013	61100	1.80096
61200	2.70529	61200	2.55196	61200	2.44792	61200	3.38943	61200	2.06927	61200	2.84386	61200	1.97781	61200	6.36531	61200	5.35327	61200	5.94184	61200	4.46478	61200	9.33123	61200	2.45933	61200	3.31403	61200	1.77601	61200	1.73182
61300	2.68199	61300	2.66269	61300	2.50152	61300	3.46538	61300	2.04373	61300	2.92267	61300	1.96963	61300	6.47558	61300	5.22555	61300	6.02134	61300	4.50938	61300	9.23297	61300	2.49245	61300	3.30095	61300	1.7363	61300	1.68198
61400	2.7386	61400	2.63403	61400	2.54049	61400	3.41431	61400	2.08527	61400	2.79918	61400	1.975	61400	6.10749	61400	5.27134	61400	5.94599	61400	4.47627	61400	9.34552	61400	2.51796	61400	3.25209	61400	1.7822	61400	1.71293
61500	2.6916	61500	2.66016	61500	2.4258	61500	3.44672	61500	2.05618	61500	2.82962	61500	1.9909	61500	5.90429	61500	5.27508	61500	5.98203	61500	4.58849	61500	9.21059	61500	2.54169	61500	3.23002	61500	1.78534	61500	1.73163
61600	2.68369	61600	2.69797	61600	2.38442	61600	3.43168	61600	2.0823	61600	2.80655	61600	1.98059	61600	5.84885	61600	5.33122	61600	6.02278	61600	4.8718	61600	9.2954	61600	2.45996	61600	3.17561	61600	1.81931	61600	1.72601
61700	2.62692	61700	2.67262	61700	2.35515	61700	3.47173	61700	2.05197	61700	2.78074	61700	1.94734	61700	5.63206	61700	5.49496	61700	5.91272	61700	4.78764	61700	9.26951	61700	2.40157	61700	3.24241	61700	1.8654	61700	1.72088
61800	2.66411	61800	2.66552	61800	2.39491	61800	3.41265	61800	2.06463	61800	2.72725	61800	1.99333	61800	5.67322	61800	5.5068	61800	5.76938	61800	4.61292	61800	9.45179	61800	2.34819	61800	3.21528	61800	1.86315	61800	1.7189
61900	2.64345	61900	2.70033	61900	2.31627	61900	3.47615	61900	2.04202	61900	2.7764	61900	1.94076	61900	5.40909	61900	5.55135	61900	5.61679	61900	4.80215	61900	9.39614	61900	2.48272	61900	3.27503	61900	1.8996	61900	1.70203
62000	2.63339	62000	2.65807	62000	2.30409	62000	3.40105	62000	2.129	62000	2.75242	62000	1.94848	62000	5.34556	62000	5.56218	62000	5.53315	62000	4.77692	62000	9.37666	62000	2.31777	62000	3.28784	62000	1.84811	62000	1.72981
62100	2.62724	62100	2.70714	62100	2.36501	62100	3.30879	62100	2.11564	62100	2.73334	62100	1.93917	62100	5.40279	62100	5.45103	62100	5.6889	62100	4.76281	62100	9.17079	62100	2.30397	62100	3.37474	62100	1.76422	62100	1.82368
62200	2.65469	62200	2.71473	62200	2.35315	62200	3.31278	62200	2.11874	62200	2.68139	62200	1.96318	62200	5.42027	62200	5.30581	62200	5.80135	62200	4.60999	62200	9.0597	62200	2.22038	62200	3.42153	62200	1.74979	62200	1.72863
62300	2.66432	62300	2.67649	62300	2.427	62300	3.38116	62300	2.07442	62300	2.70914	62300	1.94711	62300	5.5278	62300	5.3466	62300	5.82461	62300	4.6755	62300	8.98589	62300	2.22046	62300	3.46189	62300	1.85544	62300	1.76475
62400	2.71569	62400	2.71714	62400	2.47305	62400	3.43767	62400	2.04281	62400	2.72422	62400	1.90329	62400	5.60016	62400	5.33482	62400	5.86313	62400	4.60349	62400	9.08092	62400	2.20397	62400	3.48172	62400	1.8806	62400	1.79911
62500	2.64685	62500	2.69443	62500	2.42475	62500	3.38248	62500	2.04602	62500	2.72762	62500	1.93508	62500	5.50722	62500	5.32256	62500	5.82961	62500	4.68857	62500	8.96742	62500	2.20752	62500	3.50247	62500	1.83587	62500	1.82419
62600	2.67199	62600	2.69779	62600	2.38647	62600	3.37818	62600	1.99379	62600	2.74296	62600	1.93383	62600	5.70494	62600	5.38998	62600	5.87951	62600	4.58982	62600	8.91001	62600	2.21373	62600	3.38128	62600	1.86105	62600	1.86051
62700	2.70824	62700	2.67	62700	2.51765	62700	3.31859	62700	1.94847	62700	2.70369	62700	1.85426	62700	5.60775	62700	5.41338	62700	5.82294	62700	4.71407	62700	8.68206	62700	2.24681	62700	3.32328	62700	1.81897	62700	1.82288
62800	2.78348	62800	2.69611	62800	2.42286	62800	3.32887	62800	1.9993	62800	2.71229	62800	1.86309	62800	5.4203	62800	5.45902	62800	6.01254	62800	4.70361	62800	8.69997	62800	2.20772	62800	3.41052	62800	1.86146	62800	1.8126
62900	2.76539	62900	2.68497	62900	2.39118	62900	3.32283	62900	1.93674	62900	2.66088	62900	1.90991	62900	5.40713	62900	5.39549	62900	6.0385	62900	4.6329	62900	8.68987	62900	2.21237	62900	3.40595	62900	1.84523	62900	1.76947
63000	2.78499	63000	2.70397	63000	2.43514	63000	3.29953	63000	2.05143	63000	2.58289	63000	1.99652	63000	5.47452	63000	5.40261	63000	5.96226	63000	4.56072	63000	8.92005	63000	2.26244	63000	3.45467	63000	1.78137	63000	1.8079
63100	2.73288	63100	2.62468	63100	2.43736	63100	3.31594	63100	2.07883	63100	2.60127	63100	1.964	63100	5.44037	63100	5.24293	63100	5.94579	63100	4.5285	63100	8.95108	63100	2.13228	63100	3.36677	63100	1.8654	63100	1.83863
63200	2.77135	63200	2.56019	63200	2.42473	63200	3.35303	63200	2.08627	63200	2.55063	63200	1.97054	63200	5.43629	63200	5.1491	63200	6.12091	63200	4.42304	63200	8.98477	63200	2.1194	63200	3.39105	63200	1.80191	63200	1.86095
63300	2.74605	63300	2.59865	63300	2.4968	63300	3.39526	63300	2.0755	63300	2.5973	63300	1.96081	63300	5.42512	63300	5.05301	63300	6.17091	63300	4.42852	63300	9.15728	63300	2.16037	63300	3.39135	63300	1.83811	63300	1.7963
63400	2.75848	63400	2.62259	63400	2.49803	63400	3.43808	63400	2.08507	63400	2.57961	63400	1.96642	63400	5.48719	63400	5.11798	63400	6.06398	63400	4.18977	63400	9.14809	63400	2.09257	63400	3.39706	63400	1.79394	63400	1.84276
63500	2.74746	63500	2.58575	63500	2.5322	63500	3.41611	63500	2.06569	63500	2.53775	63500	1.95669	63500	5.49353	63500	5.20695	63500	6.02895	63500	4.30868	63500	9.25368	63500	2.06893	63500	3.34699	63500	1.82387	63500	1.95447
63600	2.73572	63600	2.58138	63600	2.50653	63600	3.41941	63600	2.13742	63600	2.55554	63600	1.96625	63600	5.62526	63600	5.18625	63600	5.83864	63600	4.37778	63600	9.24761	63600	2.08207	63600	3.30161	63600	1.88391	63600	1.92465
63700	2.74254	63700	2.52296	63700	2.5536	63700	3.44358	63700	2.14593	63700	2.58831	63700	2.06842	63700	5.55951	63700	5.30686	63700	6.08189	63700	4.42483	63700	9.3301	63700	2.05371	63700	3.2852	63700	1.82205	63700	1.8902
63800	2.77156	63800	2.64365	63800	2.58664	63800	3.52192	63800	2.0994	63800	2.59784	63800	2.07099	63800	5.67028	63800	5.4227	63800	6.08008	63800	4.4066	63800	9.19309	63800	2.09368	63800	3.17498	63800	1.82482	63800	1.88855
63900	2.76294	63900	2.5834	63900	2.54003	63900	3.44671	63900	2.18542	63900	2.62196	63900	2.08466	63900	5.54355	63900	5.29693	63900	6.02166	63900	4.47517	63900	9.14157	63900	2.06507	63900	3.23947	63900	1.74164	63900	1.82431
64000	2.76905	64000	2.53091	64000	2.56869	64000	3.42159	64000	2.15143	64000	2.60293	64000	2.04929	64000	5.48584	64000	5.31347	64000	5.91526	64000	4.47248	64000	9.39837	64000	2.11771	64000	3.2522	64000	1.76	64000	1.84879
64100	2.82078	64100	2.48278	64100	2.58082	64100	3.41284	64100	2.167	64100	2.69422	64100	2.03055	64100	5.62601	64100	5.39408	64100	5.88395	64100	4.54099	64100	9.15837	64100	2.09455	64100	3.2919	64100	1.70251	64100	1.90971
64200	2.74738	64200	2.40604	64200	2.52825	64200	3.34918	64200	2.1552	64200	2.67518	64200	2.0076	64200	5.77975	64200	5.21395	64200	5.75416	64200	4.55434	64200	9.071	64200	2.0854	64200	3.27421	64200	1.73629	64200	1.88156
64300	2.79264	64300	2.49334	64300	2.52995	64300	3.31961	64300	2.16589	64300	2.71465	64300	2.01573	64300	5.75484	64300	5.2063	64300	5.87185	64300	4.68426	64300	8.95746	64300	2.10053	64300	3.19954	64300	1.82361	64300	1.89411
64400	2.78027	64400	2.51824	64400	2.42546	64400	3.27649	64400	2.1644	64400	2.71987	64400	2.02189	64400	5.76635	64400	5.19446	64400	5.79871	64400	4.64403	64400	9.01607	64400	2.11776	64400	3.2044	64400	1.8052	64400	1.93368
64500	2.80822	64500	2.5398	64500	2.37889	64500	3.27717	64500	2.09436	64500	2.74383	64500	2.0694	64500	5.79186	64500	5.12227	64500	5.78969	64500	4.65717	64500	9.07176	64500	2.15472	64500	3.25342	64500	1.89104	64500	1.92001
64600	2.78938	64600	2.54412	64600	2.33787	64600	3.28211	64600	2.0577	64600	2.65202	64600	2.03236	64600	5.65936	64600	5.23599	64600	5.90024	64600	4.68415	64600	9.05542	64600	2.14567	64600	3.25597	64600	1.89078	64600	1.91132
64700	2.83505	64700	2.45545	64700	2.36901	64700	3.24541	64700	2.0647	64700	2.63108	64700	2.03565	64700	5.60561	64700	5.21484	64700	5.93869	64700	4.69468	64700	9.11335	64700	2.18847	64700	3.15267	64700	1.91128	64700	1.89223
64800	2.92441	64800	2.52893	64800	2.40072	64800	3.25841	64800	2.09312	64800	2.60049	64800	2.02584	64800	5.59427	64800	5.22596	64800	5.83216	64800	4.84548	64800	9.24161	64800	2.18014	64800	3.23697	64800	1.89588	64800	1.95125
64900	2.8364	64900	2.53422	64900	2.47366	64900	3.2685	64900	2.0712	64900	2.51771	64900	1.9959	64900	5.61799	64900	5.08788	64900	5.82997	64900	4.63387	64900	9.33477	64900	2.21265	64900	3.1837	64900	1.86069	64900	1.8749
65000	2.77227	65000	2.55537	65000	2.4341	65000	3.20371	65000	2.06908	65000	2.47875	65000	2.04528	65000	5.63582	65000	5.25709	65000	5.85477	65000	4.58318	65000	9.38163	65000	2.25494	65000	3.14767	65000	1.92031	65000	1.92584
65100	2.7589	65100	2.51277	65100	2.47661	65100	3.2713	65100	2.18782	65100	2.55188	65100	2.0439	65100	5.67284	65100	5.26107	65100	5.90505	65100	4.5877	65100	9.43549	65100	2.22274	65100	3.1732	65100	1.84836	65100	1.93555
65200	2.81914	65200	2.52799	65200	2.52702	65200	3.23186	65200	2.17175	65200	2.5717	65200	2.03602	65200	5.49536	65200	5.25076	65200	5.91976	65200	4.67475	65200	9.16622	65200	2.18755	65200	3.19971	65200	1.8194	65200	1.97085
65300	2.80556	65300	2.55612	65300	2.43718	65300	3.24138	65300	2.16038	65300	2.58118	65300	2.0528	65300	5.56576	65300	5.28803	65300	6.03717	65300	4.6978	65300	9.13885	65300	2.16673	65300	3.28871	65300	1.82836	65300	1.89491
65400	2.77127	65400	2.65829	65400	2.45484	65400	3.3234	65400	2.11528	65400	2.64867	65400	2.02598	65400	5.46695	65400	5.2261	65400	5.99537	65400	4.66083	65400	9.09764	65400	2.18392	65400	3.32302	65400	1.87206	65400	1.90942
65500	2.78737	65500	2.5785	65500	2.48028	65500	3.33657	65500	2.07449	65500	2.66063	65500	2.03896	65500	5.5808	65500	5.28182	65500	6.01369	65500	4.69945	65500	8.90347	65500	2.18125	65500	3.34285	65500	1.8092	65500	1.88214
65600	2.8719	65600	2.50961	65600	2.4324	65600	3.33098	65600	2.12911	65600	2.65896	65600	2.01281	65600	5.62202	65600	5.27945	65600	5.81465	65600	4.62651	65600	8.80838	65600	2.20801	65600	3.3433	65600	1.81257	65600	1.89161
65700	2.87776	65700	2.56742	65700	2.47628	65700	3.4697	65700	2.07512	65700	2.62072	65700	1.98115	65700	5.64937	65700	5.26383	65700	5.74042	65700	4.5933	65700	8.98524	65700	2.15736	65700	3.27671	65700	1.75135	65700	2.00131
65800	2.78387	65800	2.57688	65800	2.42359	65800	3.41611	65800	2.0657	65800	2.61766	65800	1.97804	65800	5.63202	65800	5.18387	65800	5.85356	65800	4.61663	65800	9.08543	65800	2.13572	65800	3.38285	65800	1.72146	65800	1.87074
65900	2.73188	65900	2.57015	65900	2.46177	65900	3.53688	65900	2.01353	65900	2.64853	65900	2.00005	65900	5.5207	65900	5.27545	65900	5.7628	65900	4.54236	65900	8.9961	65900	2.07396	65900	3.32409	65900	1.77037	65900	1.9485
66000	2.81743	66000	2.57403	66000	2.46884	66000	3.47387	66000	1.97763	66000	2.5426	66000	2.03647	66000	5.55238	66000	5.29834	66000	5.62527	66000	4.57748	66000	8.91953	66000	2.00311	66000	3.39435	66000	1.77427	66000	1.89735
66100	2.88009	66100	2.63715	66100	2.3803	66100	3.40364	66100	1.99516	66100	2.51753	66100	1.98793	66100	5.52589	66100	5.53177	66100	5.62192	66100	4.46734	66100	8.97988	66100	1.97039	66100	3.45063	66100	1.82967	66100	1.89444
66200	2.85209	66200	2.56358	66200	2.44635	66200	3.33979	66200	2.02124	66200	2.52154	66200	2.01673	66200	5.60237	66200	5.4592	66200	5.55058	66200	4.40939	66200	8.79576	66200	2.02918	66200	3.42499	66200	1.7735	66200	1.87228
66300	2.80901	66300	2.62378	66300	2.43375	66300	3.32922	66300	2.05722	66300	2.6242	66300	2.05508	66300	5.51614	66300	5.53042	66300	5.60739	66300	4.37165	66300	8.79516	66300	2.07128	66300	3.29299	66300	1.81169	66300	1.9259
66400	2.79686	66400	2.54811	66400	2.40893	66400	3.30434	66400	2.02723	66400	2.61759	66400	2.0342	66400	5.70198	66400	5.54456	66400	5.5183	66400	4.38264	66400	8.67724	66400	2.08629	66400	3.25695	66400	1.84721	66400	1.95198
66500	2.78351	66500	2.50979	66500	2.37033	66500	3.34043	66500	2.06449	66500	2.61856	66500	2.05866	66500	5.65867	66500	5.4754	66500	5.47816	66500	4.38727	66500	8.65618	66500	2.06905	66500	3.38095	66500	1.84322	66500	1.9357
66600	2.87361	66600	2.52738	66600	2.33579	66600	3.35978	66600	2.07607	66600	2.63378	66600	1.92954	66600	5.7014	66600	5.50443	66600	5.60094	66600	4.39145	66600	8.67609	66600	2.04257	66600	3.42219	66600	1.90481	66600	1.88286
66700	2.86839	66700	2.56406	66700	2.3757	66700	3.32772	66700	2.0474	66700	2.61452	66700	2.0093	66700	5.65625	66700	5.44663	66700	5.66212	66700	4.48589	66700	8.75249	66700	2.02117	66700	3.53991	66700	1.91924	66700	1.88629
66800	2.82781	66800	2.52607	66800	2.30719	66800	3.3308	66800	2.01315	66800	2.52096	66800	1.97104	66800	5.59558	66800	5.33232	66800	5.66491	66800	4.47672	66800	8.66762	66800	2.09851	66800	3.58882	66800	1.89761	66800	1.92121
66900	2.80198	66900	2.51021	66900	2.32731	66900	3.37349	66900	2.11065	66900	2.53538	66900	1.9902	66900	5.53576	66900	5.33603	66900	5.6622	66900	4.59663	66900	8.68788	66900	2.06214	66900	3.63483	66900	1.90808	66900	1.89359
67000	2.80278	67000	2.54902	67000	2.37304	67000	3.33648	67000	2.09898	67000	2.58301	67000	2.05676	67000	5.59964	67000	5.4116	67000	5.64544	67000	4.60148	67000	8.77922	67000	2.07302	67000	3.58307	67000	1.86673	67000	1.96602
67100	2.73256	67100	2.53845	67100	2.43632	67100	3.18868	67100	2.15331	67100	2.62851	67100	2.07374	67100	5.46665	67100	5.60659	67100	5.68963	67100	4.59272	67100	8.80952	67100	2.08437	67100	3.61982	67100	1.86634	67100	1.95205
67200	2.75787	67200	2.54496	67200	2.43658	67200	3.17589	67200	2.10237	67200	2.54091	67200	1.95997	67200	5.45344	67200	5.67314	67200	5.71436	67200	4.65914	67200	8.65427	67200	2.01742	67200	3.69665	67200	1.81233	67200	2.01873
67300	2.73617	67300	2.55559	67300	2.48596	67300	3.24286	67300	2.18823	67300	2.56111	67300	1.97531	67300	5.45694	67300	5.664	67300	5.69108	67300	4.60542	67300	8.52235	67300	2.13753	67300	3.55841	67300	1.80379	67300	1.94136
67400	2.7402	67400	2.59504	67400	2.43074	67400	3.19779	67400	2.1804	67400	2.65526	67400	1.96903	67400	5.56514	67400	5.75281	67400	5.73873	67400	4.58102	67400	8.62413	67400	2.19169	67400	3.56758	67400	1.80752	67400	1.92974
67500	2.8032	67500	2.64267	67500	2.39757	67500	3.19605	67500	2.08718	67500	2.65086	67500	1.96402	67500	5.68864	67500	5.73722	67500	5.77645	67500	4.62337	67500	8.72989	67500	2.21932	67500	3.51194	67500	1.7914	67500	1.84733
67600	2.75607	67600	2.69268	67600	2.4351	67600	3.2452	67600	2.05609	67600	2.5689	67600	1.89055	67600	5.72392	67600	5.61573	67600	5.90061	67600	4.59808	67600	8.70245	67600	2.17049	67600	3.3924	67600	1.82434	67600	1.86785
67700	2.71804	67700	2.7081	67700	2.50876	67700	3.16129	67700	2.05668	67700	2.62028	67700	1.95074	67700	5.69756	67700	5.8267	67700	5.9838	67700	4.65292	67700	8.77955	67700	2.1782	67700	3.29614	67700	1.82853	67700	1.88674
67800	2.74566	67800	2.56537	67800	2.53955	67800	3.1706	67800	2.04636	67800	2.64353	67800	1.89439	67800	5.61865	67800	5.71241	67800	5.96496	67800	4.6656	67800	8.79736	67800	2.16616	67800	3.32478	67800	1.91668	67800	1.8465
67900	2.7816	67900	2.52824	67900	2.43357	67900	3.23673	67900	2.116	67900	2.68069	67900	1.8413	67900	5.67401	67900	5.69281	67900	6.1328	67900	4.58015	67900	8.94755	67900	2.17014	67900	3.24386	67900	1.8197	67900	1.82086
68000	2.82134	68000	2.62676	68000	2.44487	68000	3.24852	68000	2.09031	68000	2.64515	68000	1.80551	68000	5.7673	68000	5.78242	68000	6.20783	68000	4.62213	68000	9.10584	68000	2.22659	68000	3.3934	68000	1.81925	68000	1.85354
68100	2.74943	68100	2.66843	68100	2.38697	68100	3.28117	68100	2.05448	68100	2.6381	68100	1.87135	68100	5.51823	68100	5.85132	68100	6.08889	68100	4.63371	68100	9.15486	68100	2.20688	68100	3.40589	68100	1.81695	68100	1.93449
68200	2.763	68200	2.63485	68200	2.38103	68200	3.20051	68200	2.11345	68200	2.62198	68200	1.90559	68200	5.60302	68200	5.81356	68200	6.10091	68200	4.80264	68200	9.21437	68200	2.21791	68200	3.47854	68200	1.79156	68200	1.87011
68300	2.74853	68300	2.62875	68300	2.36431	68300	3.23083	68300	2.13561	68300	2.67607	68300	1.87812	68300	5.55138	68300	5.75466	68300	5.95518	68300	4.75752	68300	9.2921	68300	2.15766	68300	3.52577	68300	1.80062	68300	1.95582
68400	2.74904	68400	2.62929	68400	2.30681	68400	3.26529	68400	2.08904	68400	2.61319	68400	1.90794	68400	5.46202	68400	5.79027	68400	5.92682	68400	4.95158	68400	9.38846	68400	2.20605	68400	3.50595	68400	1.81111	68400	2.0337
68500	2.77659	68500	2.623	68500	2.35861	68500	3.25909	68500	2.10727	68500	2.5913	68500	1.91117	68500	5.5879	68500	5.86942	68500	5.95203	68500	4.87174	68500	9.29524	68500	2.24216	68500	3.52815	68500	1.83286	68500	1.97003
68600	2.73097	68600	2.67578	68600	2.31719	68600	3.26615	68600	2.14689	68600	2.67703	68600	1.91158	68600	5.64344	68600	5.74611	68600	5.99213	68600	4.64612	68600	9.27759	68600	2.12035	68600	3.64517	68600	1.81443	68600	1.925
68700	2.71854	68700	2.69176	68700	2.2305	68700	3.29963	68700	2.17507	68700	2.61093	68700	1.89307	68700	5.63227	68700	5.8146	68700	5.89702	68700	4.56579	68700	9.28728	68700	2.13151	68700	3.61267	68700	1.86631	68700	1.89728
68800	2.73918	68800	2.61936	68800	2.36394	68800	3.22173	68800	2.19604	68800	2.64018	68800	1.88224	68800	5.40497	68800	5.75843	68800	5.87959	68800	4.51393	68800	9.36945	68800	2.15063	68800	3.59224	68800	1.82287	68800	1.91076
68900	2.76144	68900	2.55288	68900	2.26082	68900	3.18259	68900	2.09561	68900	2.63342	68900	1.85661	68900	5.51922	68900	5.66155	68900	5.84221	68900	4.37187	68900	9.43667	68900	2.18848	68900	3.6317	68900	1.83234	68900	1.8814
69000	2.80304	69000	2.60091	69000	2.28237	69000	3.14349	69000	2.22926	69000	2.71162	69000	1.87882	69000	5.48843	69000	5.51718	69000	5.91467	69000	4.46847	69000	9.73105	69000	2.1509	69000	3.67747	69000	1.91506	69000	1.90287
69100	2.76077	69100	2.59678	69100	2.31757	69100	3.17239	69100	2.27451	69100	2.69706	69100	1.90906	69100	5.2321	69100	5.45665	69100	5.99219	69100	4.48581	69100	9.95842	69100	2.17907	69100	3.68072	69100	1.82068	69100	1.83387
69200	2.80378	69200	2.55808	69200	2.31907	69200	3.22685	69200	2.38389	69200	2.71908	69200	1.87992	69200	5.28212	69200	5.36547	69200	5.98753	69200	4.48947	69200	10.0614	69200	2.20139	69200	3.74618	69200	1.85657	69200	1.85653
69300	2.86504	69300	2.60376	69300	2.3618	69300	3.23211	69300	2.38368	69300	2.6718	69300	1.93417	69300	5.53129	69300	5.32974	69300	5.94575	69300	4.47506	69300	10.2218	69300	2.23352	69300	3.82725	69300	1.8763	69300	1.93088
69400	2.87376	69400	2.62373	69400	2.32981	69400	3.18643	69400	2.30639	69400	2.64841	69400	1.95998	69400	5.63405	69400	5.50403	69400	5.91332	69400	4.54991	69400	10.2737	69400	2.2414	69400	3.86064	69400	1.88883	69400	1.88885
69500	2.83836	69500	2.53369	69500	2.3481	69500	3.19317	69500	2.39453	69500	2.58908	69500	1.96168	69500	5.71808	69500	5.55434	69500	5.98751	69500	4.40958	69500	10.4445	69500	2.1817	69500	3.7994	69500	1.833	69500	1.92173
69600	2.84728	69600	2.55293	69600	2.40805	69600	3.24956	69600	2.44029	69600	2.62714	69600	1.98939	69600	5.79875	69600	5.40869	69600	5.87676	69600	4.51796	69600	10.4561	69600	2.20316	69600	3.75127	69600	1.7988	69600	1.92571
69700	2.83967	69700	2.58333	69700	2.37387	69700	3.19398	69700	2.37278	69700	2.63236	69700	1.96983	69700	5.96934	69700	5.45842	69700	5.82035	69700	4.69034	69700	10.2884	69700	2.13976	69700	3.75883	69700	1.77405	69700	1.93122
69800	2.72134	69800	2.69394	69800	2.39183	69800	3.14768	69800	2.33565	69800	2.68114	69800	1.98778	69800	5.8365	69800	5.49581	69800	5.70978	69800	4.73342	69800	10.4143	69800	2.21635	69800	3.77027	69800	1.71226	69800	1.90716
69900	2.75459	69900	2.65123	69900	2.40635	69900	3.19075	69900	2.29854	69900	2.68549	69900	1.94783	69900	5.9383	69900	5.4618	69900	5.76639	69900	4.72204	69900	10.5119	69900	2.22917	69900	3.80997	69900	1.7147	69900	1.81226
70000	2.81441	70000	2.61213	70000	2.47088	70000	3.18204	70000	2.3746	70000	2.64781	70000	1.97165	70000	6.03348	70000	5.64905	70000	5.85256	70000	4.81051	70000	10.3473	70000	2.21059	70000	3.83836	70000	1.69122	70000	1.8128
70100	2.71614	70100	2.63982	70100	2.48097	70100	3.15812	70100	2.32754	70100	2.65132	70100	1.94653	70100	5.96009	70100	5.46395	70100	5.70111	70100	4.78597	70100	10.0693	70100	2.12516	70100	3.7451	70100	1.67961	70100	1.81056
70200	2.74605	70200	2.57205	70200	2.54986	70200	3.20582	70200	2.37232	70200	2.64955	70200	1.98374	70200	5.89639	70200	5.41736	70200	5.73704	70200	4.92608	70200	10.0092	70200	2.12768	70200	3.84938	70200	1.66801	70200	1.89728
70300	2.76161	70300	2.44685	70300	2.50129	70300	3.1277	70300	2.42614	70300	2.59329	70300	1.98319	70300	6.01281	70300	5.46708	70300	5.798	70300	4.83653	70300	10.0726	70300	2.20274	70300	3.92449	70300	1.77061	70300	2.0129
70400	2.71485	70400	2.52559	70400	2.51052	70400	3.1715	70400	2.48146	70400	2.58611	70400	1.94832	70400	6.02188	70400	5.6116	70400	5.56134	70400	4.96275	70400	10.295	70400	2.18382	70400	3.78181	70400	1.78659	70400	1.98472
70500	2.76675	70500	2.57465	70500	2.50645	70500	3.12497	70500	2.39006	70500	2.60981	70500	1.93671	70500	6.10043	70500	5.58648	70500	5.55488	70500	4.99783	70500	10.3712	70500	2.23972	70500	3.6691	70500	1.8031	70500	1.96821
70600	2.82143	70600	2.57059	70600	2.47208	70600	3.19371	70600	2.41296	70600	2.6098	70600	1.98272	70600	6.02689	70600	5.46516	70600	5.63421	70600	4.95749	70600	10.5653	70600	2.17805	70600	3.70449	70600	1.78096	70600	1.94461
70700	2.81768	70700	2.53456	70700	2.49418	70700	3.1554	70700	2.44503	70700	2.61834	70700	1.93227	70700	5.93826	70700	5.49776	70700	5.6864	70700	4.8637	70700	10.4109	70700	2.22994	70700	3.56414	70700	1.72653	70700	1.9932
70800	2.83459	70800	2.5239	70800	2.50615	70800	3.11382	70800	2.44912	70800	2.57911	70800	1.90431	70800	5.83361	70800	5.46441	70800	5.48745	70800	4.88728	70800	10.3578	70800	2.27621	70800	3.56084	70800	1.72713	70800	1.9748
70900	2.80273	70900	2.5237	70900	2.47587	70900	3.09691	70900	2.45374	70900	2.59419	70900	1.8988	70900	5.82112	70900	5.53237	70900	5.52124	70900	4.76686	70900	10.1124	70900	2.36833	70900	3.63621	70900	1.62565	70900	1.98068
71000	2.82663	71000	2.56413	71000	2.40423	71000	3.0739	71000	2.3458	71000	2.52259	71000	1.92675	71000	5.75519	71000	5.60958	71000	5.46436	71000	4.73695	71000	10.0819	71000	2.41689	71000	3.54852	71000	1.63492	71000	1.89961
71100	2.76248	71100	2.55634	71100	2.40965	71100	3.13769	71100	2.41806	71100	2.55049	71100	1.97427	71100	5.81334	71100	5.70432	71100	5.44952	71100	4.74455	71100	9.82202	71100	2.33689	71100	3.58075	71100	1.66348	71100	1.94468
71200	2.73819	71200	2.51827	71200	2.37726	71200	3.09952	71200	2.49138	71200	2.64478	71200	1.97212	71200	5.67111	71200	5.79518	71200	5.36244	71200	4.88523	71200	9.9197	71200	2.38429	71200	3.52576	71200	1.65214	71200	1.98692
71300	2.83326	71300	2.49766	71300	2.38605	71300	3.14341	71300	2.47779	71300	2.59367	71300	1.9887	71300	5.71461	71300	5.63571	71300	5.37964	71300	4.88464	71300	10.0414	71300	2.28695	71300	3.74797	71300	1.68601	71300	2.00786
71400	2.76842	71400	2.53894	71400	2.33191	71400	3.20744	71400	2.34983	71400	2.61389	71400	1.96075	71400	5.73797	71400	5.67551	71400	5.38052	71400	4.84202	71400	10.2058	71400	2.28172	71400	3.80444	71400	1.70474	71400	1.96503
71500	2.72631	71500	2.63398	71500	2.28125	71500	3.2151	71500	2.3208	71500	2.45243	71500	1.9772	71500	5.60652	71500	5.75162	71500	5.35037	71500	4.8548	71500	10.272	71500	2.28702	71500	3.75103	71500	1.72776	71500	1.96867
71600	2.68158	71600	2.5675	71600	2.22265	71600	3.08437	71600	2.38352	71600	2.58297	71600	1.97316	71600	5.55691	71600	5.71334	71600	5.31886	71600	4.81194	71600	10.3512	71600	2.27517	71600	3.69481	71600	1.70672	71600	1.99835
71700	2.75207	71700	2.57268	71700	2.26346	71700	3.23122	71700	2.41998	71700	2.48856	71700	2.00507	71700	5.64716	71700	5.62258	71700	5.35995	71700	4.78945	71700	10.1286	71700	2.26876	71700	3.72193	71700	1.72801	71700	2.03306
71800	2.75924	71800	2.61688	71800	2.23902	71800	3.17364	71800	2.59546	71800	2.45145	71800	1.98207	71800	5.76811	71800	5.60651	71800	5.44848	71800	4.73668	71800	10.0194	71800	2.2643	71800	3.73973	71800	1.70421	71800	1.96953
71900	2.77803	71900	2.52167	71900	2.26697	71900	3.21617	71900	2.50847	71900	2.49789	71900	1.93587	71900	5.63075	71900	5.65912	71900	5.41639	71900	4.75225	71900	10.1791	71900	2.22627	71900	3.77362	71900	1.71448	71900	2.04128
72000	2.7894	72000	2.47817	72000	2.2772	72000	3.15687	72000	2.45048	72000	2.48771	72000	1.99815	72000	5.7761	72000	5.73556	72000	5.48676	72000	4.66805	72000	10.1026	72000	2.24905	72000	3.67546	72000	1.67025	72000	2.03869
72100	2.73173	72100	2.51817	72100	2.29656	72100	3.09432	72100	2.2712	72100	2.4828	72100	2.01429	72100	5.92911	72100	5.88528	72100	5.49212	72100	4.73578	72100	10.0811	72100	2.33855	72100	3.72099	72100	1.7271	72100	2.02239
72200	2.70681	72200	2.48521	72200	2.23836	72200	3.03978	72200	2.34219	72200	2.40185	72200	2.04511	72200	5.83055	72200	5.79703	72200	5.39765	72200	4.7051	72200	10.3375	72200	2.35136	72200	3.64428	72200	1.77289	72200	2.09725
72300	2.60647	72300	2.44953	72300	2.22343	72300	3.07803	72300	2.47051	72300	2.45454	72300	2.03905	72300	5.79357	72300	5.8297	72300	5.42618	72300	4.63464	72300	10.2316	72300	2.2482	72300	3.5245	72300	1.75036	72300	2.00075
72400	2.63376	72400	2.51621	72400	2.1952	72400	3.11141	72400	2.51706	72400	2.40854	72400	2.06229	72400	5.87617	72400	5.83819	72400	5.51567	72400	4.63859	72400	10.1406	72400	2.33245	72400	3.51427	72400	1.79511	72400	2.04861
72500	2.61894	72500	2.48377	72500	2.18435	72500	3.11815	72500	2.50601	72500	2.44669	72500	1.97346	72500	5.94865	72500	5.80324	72500	5.45229	72500	4.60577	72500	10.1225	72500	2.35373	72500	3.52008	72500	1.76321	72500	2.02538
72600	2.5876	72600	2.53086	72600	2.27334	72600	3.05238	72600	2.57178	72600	2.42107	72600	1.98017	72600	5.85776	72600	5.73659	72600	5.39245	72600	4.63291	72600	10.2475	72600	2.42996	72600	3.49977	72600	1.77005	72600	1.99676
72700	2.58384	72700	2.4949	72700	2.21944	72700	3.04405	72700	2.61278	72700	2.40919	72700	1.98883	72700	5.95875	72700	5.77698	72700	5.46387	72700	4.62137	72700	10.3951	72700	2.31655	72700	3.4941	72700	1.79704	72700	1.97256
72800	2.61926	72800	2.54587	72800	2.27934	72800	3.03555	72800	2.61078	72800	2.45253	72800	1.97595	72800	5.87955	72800	5.78527	72800	5.44292	72800	4.65223	72800	10.4572	72800	2.34201	72800	3.51379	72800	1.81582	72800	1.99635
72900	2.59955	72900	2.60922	72900	2.23932	72900	3.09669	72900	2.52483	72900	2.47912	72900	2.02419	72900	5.9495	72900	5.65373	72900	5.44037	72900	4.56451	72900	10.4949	72900	2.29462	72900	3.51971	72900	1.86073	72900	2.05536
73000	2.55162	73000	2.58677	73000	2.26451	73000	3.04345	73000	2.53745	73000	2.50733	73000	2.01774	73000	6.09027	73000	5.546	73000	5.35689	73000	4.52383	73000	10.366	73000	2.22427	73000	3.47009	73000	1.89	73000	2.02546
73100	2.44607	73100	2.64159	73100	2.25484	73100	3.19432	73100	2.38826	73100	2.51051	73100	2.01012	73100	6.04547	73100	5.52697	73100	5.45948	73100	4.60661	73100	10.4018	73100	2.25093	73100	3.47284	73100	1.88246	73100	2.02006
73200	2.4182	73200	2.67571	73200	2.29567	73200	3.18692	73200	2.47269	73200	2.47283	73200	2.04439	73200	6.04699	73200	5.33234	73200	5.48162	73200	4.66379	73200	10.5706	73200	2.32451	73200	3.50406	73200	1.91238	73200	2.03332
73300	2.46444	73300	2.60208	73300	2.3963	73300	3.21748	73300	2.51301	73300	2.49221	73300	2.04207	73300	5.96051	73300	5.41815	73300	5.3507	73300	4.53756	73300	10.4886	73300	2.33325	73300	3.52045	73300	1.85034	73300	1.98947
73400	2.44491	73400	2.60503	73400	2.38798	73400	3.17017	73400	2.62847	73400	2.483	73400	2.0772	73400	5.87891	73400	5.43048	73400	5.33537	73400	4.51166	73400	10.4719	73400	2.2334	73400	3.39173	73400	1.88679	73400	1.99898
73500	2.51815	73500	2.6189	73500	2.43543	73500	3.21423	73500	2.64967	73500	2.43502	73500	1.96741	73500	5.83706	73500	5.48266	73500	5.41964	73500	4.57971	73500	10.7503	73500	2.26598	73500	3.42704	73500	1.83231	73500	1.98393
73600	2.53706	73600	2.58277	73600	2.32623	73600	3.19727	73600	2.6912	73600	2.44782	73600	2.01342	73600	5.61673	73600	5.45946	73600	5.43034	73600	4.45393	73600	10.5921	73600	2.25256	73600	3.43604	73600	1.76853	73600	2.03111
73700	2.60859	73700	2.564	73700	2.30019	73700	3.22998	73700	2.59954	73700	2.44351	73700	2.02638	73700	5.45087	73700	5.41643	73700	5.49411	73700	4.40719	73700	10.4625	73700	2.24589	73700	3.42519	73700	1.75031	73700	2.03136
73800	2.62445	73800	2.56197	73800	2.3258	73800	3.2349	73800	2.65853	73800	2.4288	73800	2.04304	73800	5.57601	73800	5.47934	73800	5.43959	73800	4.3641	73800	10.5104	73800	2.25806	73800	3.52257	73800	1.67035	73800	2.03523
73900	2.65418	73900	2.51374	73900	2.32899	73900	3.18412	73900	2.68081	73900	2.3801	73900	2.02079	73900	5.68186	73900	5.53625	73900	5.41571	73900	4.23805	73900	10.7626	73900	2.32452	73900	3.48262	73900	1.70388	73900	2.05425
74000	2.60429	74000	2.50136	74000	2.31616	74000	3.26674	74000	2.55657	74000	2.43227	74000	2.00093	74000	5.74353	74000	5.41202	74000	5.37084	74000	4.27881	74000	10.6656	74000	2.296	74000	3.52155	74000	1.70347	74000	2.03974
74100	2.69575	74100	2.53255	74100	2.31472	74100	3.13776	74100	2.54706	74100	2.40518	74100	2.00101	74100	5.824	74100	5.44426	74100	5.2475	74100	4.17217	74100	10.703	74100	2.28971	74100	3.46613	74100	1.74719	74100	2.04757
74200	2.61628	74200	2.49436	74200	2.29748	74200	3.24132	74200	2.54446	74200	2.38408	74200	2.00573	74200	5.64054	74200	5.61239	74200	5.25933	74200	4.15868	74200	10.3837	74200	2.27484	74200	3.51517	74200	1.7087	74200	2.02614
74300	2.55483	74300	2.57262	74300	2.28927	74300	3.22993	74300	2.46993	74300	2.35746	74300	1.98336	74300	5.3998	74300	5.65959	74300	5.31115	74300	4.25086	74300	10.1651	74300	2.29003	74300	3.4395	74300	1.7437	74300	2.04031
74400	2.52895	74400	2.55876	74400	2.28282	74400	3.17668	74400	2.44252	74400	2.36175	74400	2.03715	74400	5.47332	74400	5.57273	74400	5.37702	74400	4.30743	74400	10.1422	74400	2.28555	74400	3.45709	74400	1.7896	74400	2.01526
74500	2.62062	74500	2.52097	74500	2.3268	74500	3.18521	74500	2.5156	74500	2.39626	74500	2.05687	74500	5.46945	74500	5.70153	74500	5.32314	74500	4.42171	74500	10.0992	74500	2.26551	74500	3.55577	74500	1.77225	74500	2.13992
74600	2.60065	74600	2.49054	74600	2.39086	74600	3.1781	74600	2.48325	74600	2.41075	74600	1.9862	74600	5.44157	74600	5.70787	74600	5.41572	74600	4.43454	74600	10.217	74600	2.25579	74600	3.60295	74600	1.7671	74600	2.13886
74700	2.58419	74700	2.60049	74700	2.36445	74700	3.1638	74700	2.4599	74700	2.43073	74700	2.02657	74700	5.47457	74700	5.72049	74700	5.3194	74700	4.24309	74700	10.3766	74700	2.16676	74700	3.53346	74700	1.78165	74700	2.10573
74800	2.63005	74800	2.57745	74800	2.34539	74800	3.12508	74800	2.42023	74800	2.4327	74800	2.11653	74800	5.55995	74800	5.79617	74800	5.24429	74800	4.10855	74800	10.2296	74800	2.14067	74800	3.60615	74800	1.74812	74800	2.14413
74900	2.66372	74900	2.47925	74900	2.34051	74900	3.17689	74900	2.45642	74900	2.34606	74900	2.03097	74900	5.47151	74900	5.96583	74900	5.1778	74900	4.08916	74900	10.1903	74900	2.14975	74900	3.6864	74900	1.76511	74900	2.16384
75000	2.7736	75000	2.45527	75000	2.37065	75000	3.19237	75000	2.58082	75000	2.3823	75000	2.11876	75000	5.47525	75000	5.80139	75000	5.13677	75000	4.03447	75000	10.251	75000	2.14874	75000	3.66518	75000	1.77926	75000	2.11143
75100	2.69131	75100	2.49246	75100	2.30312	75100	3.22035	75100	2.49952	75100	2.39688	75100	2.14751	75100	5.52277	75100	5.54392	75100	5.15331	75100	4.1262	75100	10.2988	75100	2.11789	75100	3.61221	75100	1.78497	75100	2.11299
75200	2.71098	75200	2.54722	75200	2.29178	75200	3.22376	75200	2.41541	75200	2.37893	75200	2.11334	75200	5.4383	75200	5.57478	75200	5.17658	75200	4.19912	75200	10.2978	75200	2.08011	75200	3.79217	75200	1.80735	75200	2.05616
75300	2.83356	75300	2.55987	75300	2.33694	75300	3.20515	75300	2.37917	75300	2.34445	75300	2.13962	75300	5.47659	75300	5.72323	75300	5.10521	75300	4.32769	75300	10.2492	75300	2.07095	75300	3.75349	75300	1.80579	75300	2.21109
75400	2.82819	75400	2.41749	75400	2.39794	75400	3.2146	75400	2.34621	75400	2.37923	75400	2.15202	75400	5.40665	75400	5.68341	75400	5.09249	75400	4.2758	75400	10.2858	75400	2.10217	75400	3.75726	75400	1.77882	75400	2.1289
75500	2.76447	75500	2.44025	75500	2.39213	75500	3.28255	75500	2.30463	75500	2.38828	75500	2.23541	75500	5.50788	75500	5.7679	75500	5.13949	75500	4.24856	75500	10.529	75500	2.16386	75500	3.7257	75500	1.83967	75500	2.08385
75600	2.77039	75600	2.45637	75600	2.40695	75600	3.34418	75600	2.31	75600	2.29947	75600	2.14242	75600	5.72022	75600	5.79154	75600	5.29292	75600	4.23267	75600	10.5768	75600	2.16889	75600	3.856	75600	1.89025	75600	2.1506
75700	2.81761	75700	2.42098	75700	2.37655	75700	3.257	75700	2.25212	75700	2.34877	75700	2.19168	75700	5.59248	75700	5.6877	75700	5.31354	75700	4.20096	75700	10.4957	75700	2.15244	75700	3.99171	75700	1.86137	75700	2.0635
75800	2.83882	75800	2.46117	75800	2.28498	75800	3.19169	75800	2.24825	75800	2.37638	75800	2.12119	75800	5.68583	75800	5.7442	75800	5.36615	75800	4.10169	75800	10.5339	75800	2.10198	75800	3.91764	75800	1.82269	75800	2.05375
75900	2.81411	75900	2.43078	75900	2.36211	75900	3.28388	75900	2.23234	75900	2.42431	75900	2.01784	75900	5.66467	75900	5.79591	75900	5.33707	75900	4.16891	75900	10.3311	75900	2.22593	75900	3.94262	75900	1.84094	75900	2.16403
76000	2.8219	76000	2.3985	76000	2.3185	76000	3.34747	76000	2.34496	76000	2.39387	76000	2.02712	76000	5.58681	76000	5.7993	76000	5.31184	76000	4.2343	76000	10.3588	76000	2.17324	76000	3.98143	76000	1.76487	76000	1.99766
76100	2.73876	76100	2.41305	76100	2.41498	76100	3.29721	76100	2.38797	76100	2.31862	76100	2.01709	76100	5.64215	76100	5.72276	76100	5.37464	76100	4.25797	76100	10.2009	76100	2.24904	76100	3.91474	76100	1.82308	76100	1.95511
76200	2.79553	76200	2.47279	76200	2.39685	76200	3.29256	76200	2.43065	76200	2.32534	76200	2.08172	76200	5.78536	76200	5.73312	76200	5.47069	76200	4.22796	76200	10.2764	76200	2.23558	76200	3.87517	76200	1.86701	76200	2.02439
76300	2.6547	76300	2.49232	76300	2.35902	76300	3.33243	76300	2.51845	76300	2.3612	76300	2.05554	76300	5.75338	76300	5.72285	76300	5.37612	76300	4.10456	76300	10.1566	76300	2.22813	76300	3.94651	76300	1.8517	76300	2.07564
76400	2.76231	76400	2.52369	76400	2.31577	76400	3.25783	76400	2.43914	76400	2.43548	76400	2.12694	76400	5.7374	76400	5.7616	76400	5.38413	76400	4.0637	76400	10.1562	76400	2.15049	76400	3.9381	76400	1.81674	76400	2.01521
76500	2.68441	76500	2.54898	76500	2.3003	76500	3.3502	76500	2.47437	76500	2.47647	76500	2.02896	76500	5.72672	76500	5.81306	76500	5.37295	76500	4.06213	76500	10.0844	76500	2.30737	76500	3.85935	76500	1.87637	76500	2.02562
76600	2.65013	76600	2.45629	76600	2.3492	76600	3.34454	76600	2.47274	76600	2.49593	76600	2.01563	76600	5.69069	76600	5.68404	76600	5.37047	76600	4.04712	76600	10.1076	76600	2.34598	76600	3.86547	76600	1.87235	76600	1.99374
76700	2.58432	76700	2.47944	76700	2.32353	76700	3.37194	76700	2.49028	76700	2.44734	76700	2.03566	76700	5.87533	76700	5.82721	76700	5.26921	76700	4.1513	76700	10.004	76700	2.27869	76700	3.79919	76700	1.91943	76700	1.8874
76800	2.60742	76800	2.56281	76800	2.34665	76800	3.35616	76800	2.50244	76800	2.47274	76800	2.06537	76800	5.8181	76800	5.8441	76800	5.31266	76800	4.08216	76800	10.1182	76800	2.29197	76800	3.8835	76800	1.86843	76800	1.89396
76900	2.62394	76900	2.5272	76900	2.34186	76900	3.38965	76900	2.58604	76900	2.54863	76900	1.9708	76900	5.80617	76900	5.95488	76900	5.32028	76900	4.12003	76900	9.98843	76900	2.26246	76900	3.81553	76900	1.87067	76900	2.0167
77000	2.58235	77000	2.48809	77000	2.37037	77000	3.32456	77000	2.51581	77000	2.48319	77000	2.02247	77000	5.70954	77000	5.83793	77000	5.30863	77000	4.01815	77000	10.0865	77000	2.21187	77000	3.8176	77000	1.85131	77000	1.99613
77100	2.70145	77100	2.51206	77100	2.34719	77100	3.21634	77100	2.52071	77100	2.45065	77100	2.04722	77100	5.77606	77100	5.81805	77100	5.31995	77100	4.20882	77100	10.3349	77100	2.21845	77100	3.88375	77100	1.90249	77100	2.04688
77200	2.64247	77200	2.55835	77200	2.33469	77200	3.28246	77200	2.39817	77200	2.54679	77200	2.05803	77200	5.83591	77200	5.86162	77200	5.35231	77200	4.14006	77200	10.427	77200	2.17249	77200	3.899	77200	1.86438	77200	2.0688
77300	2.66883	77300	2.60056	77300	2.33281	77300	3.22279	77300	2.42646	77300	2.4459	77300	2.02375	77300	5.82299	77300	5.81438	77300	5.37784	77300	4.11246	77300	10.4093	77300	2.2385	77300	3.8534	77300	1.82471	77300	2.12408
77400	2.717	77400	2.46285	77400	2.29847	77400	3.19619	77400	2.40069	77400	2.41898	77400	2.04672	77400	5.99173	77400	5.83189	77400	5.35579	77400	4.14138	77400	10.4228	77400	2.23872	77400	3.78605	77400	1.83297	77400	2.05533
77500	2.71273	77500	2.54315	77500	2.29892	77500	3.34784	77500	2.49048	77500	2.47523	77500	2.01497	77500	5.98764	77500	6.03629	77500	5.34433	77500	4.28544	77500	10.4323	77500	2.24602	77500	3.79692	77500	1.94204	77500	2.14167
77600	2.76845	77600	2.44257	77600	2.2924	77600	3.3767	77600	2.41794	77600	2.51078	77600	1.9634	77600	5.95075	77600	6.05987	77600	5.40468	77600	4.34744	77600	10.5699	77600	2.17569	77600	3.7507	77600	1.82485	77600	2.11222
77700	2.74349	77700	2.44043	77700	2.37474	77700	3.24897	77700	2.3857	77700	2.46075	77700	1.95765	77700	5.8253	77700	6.21009	77700	5.47034	77700	4.38846	77700	10.762	77700	2.12593	77700	3.83975	77700	1.7712	77700	2.12289
77800	2.75484	77800	2.40399	77800	2.34121	77800	3.30401	77800	2.44396	77800	2.50291	77800	1.94526	77800	5.76638	77800	6.13536	77800	5.52877	77800	4.52545	77800	10.749	77800	2.22751	77800	3.85059	77800	1.77174	77800	2.19553
77900	2.72957	77900	2.48474	77900	2.35696	77900	3.18547	77900	2.41165	77900	2.50919	77900	1.97923	77900	5.9751	77900	6.23031	77900	5.46366	77900	4.45777	77900	11.0028	77900	2.15929	77900	3.79004	77900	1.71017	77900	2.11704
78000	2.75394	78000	2.53501	78000	2.28763	78000	3.15413	78000	2.45845	78000	2.50738	78000	1.95644	78000	5.77525	78000	6.07998	78000	5.59743	78000	4.36821	78000	11.1654	78000	2.19543	78000	3.7701	78000	1.80666	78000	2.12886
78100	2.72213	78100	2.51661	78100	2.34023	78100	3.2003	78100	2.52071	78100	2.48302	78100	1.99746	78100	5.82817	78100	6.09429	78100	5.67819	78100	4.41505	78100	11.0253	78100	2.13984	78100	3.71291	78100	1.79951	78100	2.10338
78200	2.65316	78200	2.53016	78200	2.33438	78200	3.23872	78200	2.52818	78200	2.49986	78200	1.95608	78200	5.8641	78200	6.24067	78200	5.6483	78200	4.38247	78200	10.9429	78200	2.13982	78200	3.73201	78200	1.81917	78200	2.03138
78300	2.67793	78300	2.53324	78300	2.35166	78300	3.23652	78300	2.5216	78300	2.4877	78300	1.99908	78300	5.92949	78300	6.24373	78300	5.63148	78300	4.26214	78300	10.9079	78300	2.11922	78300	3.65762	78300	1.87764	78300	1.98397
78400	2.61651	78400	2.59743	78400	2.35302	78400	3.22524	78400	2.60532	78400	2.54271	78400	2.01659	78400	5.73977	78400	6.24443	78400	5.66696	78400	4.27536	78400	10.7039	78400	2.07604	78400	3.60495	78400	1.93431	78400	2.05175
78500	2.73244	78500	2.54677	78500	2.32254	78500	3.33531	78500	2.50284	78500	2.50773	78500	2.04441	78500	5.84289	78500	6.38368	78500	5.72309	78500	4.21428	78500	10.636	78500	2.1112	78500	3.46268	78500	1.88774	78500	2.03541
78600	2.76308	78600	2.50206	78600	2.39854	78600	3.28972	78600	2.52981	78600	2.6249	78600	2.04002	78600	5.84297	78600	6.22366	78600	5.63538	78600	4.23073	78600	10.6754	78600	2.08669	78600	3.5354	78600	1.96748	78600	2.03722
78700	2.79753	78700	2.56543	78700	2.43466	78700	3.2444	78700	2.58634	78700	2.56362	78700	2.03602	78700	5.86992	78700	6.21389	78700	5.64948	78700	4.3517	78700	10.899	78700	2.11771	78700	3.54181	78700	1.94711	78700	1.9864
78800	2.86617	78800	2.59479	78800	2.485	78800	3.25835	78800	2.68241	78800	2.62223	78800	2.07646	78800	5.74847	78800	6.21621	78800	5.64857	78800	4.19149	78800	10.7965	78800	2.16005	78800	3.5584	78800	1.87774	78800	2.02163
78900	2.77212	78900	2.56894	78900	2.57193	78900	3.32285	78900	2.65305	78900	2.60517	78900	2.02171	78900	5.81573	78900	6.52473	78900	5.65995	78900	4.07626	78900	10.7282	78900	2.02744	78900	3.65746	78900	1.85864	78900	2.07565
79000	2.80046	79000	2.57239	79000	2.5543	79000	3.30983	79000	2.58986	79000	2.59294	79000	2.00201	79000	5.69781	79000	6.44911	79000	5.52182	79000	4.10624	79000	10.8264	79000	1.97641	79000	3.54022	79000	1.83784	79000	1.98308
79100	2.78425	79100	2.56041	79100	2.54735	79100	3.36189	79100	2.59827	79100	2.57071	79100	2.00333	79100	5.56415	79100	6.38751	79100	5.6901	79100	4.22747	79100	10.5793	79100	2.09509	79100	3.53734	79100	1.84354	79100	2.05152
79200	2.78713	79200	2.53848	79200	2.58694	79200	3.34826	79200	2.65265	79200	2.55136	79200	2.02805	79200	5.60525	79200	6.3401	79200	5.62032	79200	4.14275	79200	10.5199	79200	2.03638	79200	3.50346	79200	1.81847	79200	2.03181
79300	2.83086	79300	2.58056	79300	2.61948	79300	3.33991	79300	2.57597	79300	2.59545	79300	2.01231	79300	5.81052	79300	6.38676	79300	5.68861	79300	4.11923	79300	10.4469	79300	2.14225	79300	3.52435	79300	1.79601	79300	2.04191
79400	2.78185	79400	2.63612	79400	2.62161	79400	3.3944	79400	2.54966	79400	2.56336	79400	2.05416	79400	5.70963	79400	6.41041	79400	5.67116	79400	4.0005	79400	10.6113	79400	2.0914	79400	3.47231	79400	1.83248	79400	2.05301
79500	2.83787	79500	2.64083	79500	2.59733	79500	3.3914	79500	2.64244	79500	2.54921	79500	2.05697	79500	5.71807	79500	6.40225	79500	5.70842	79500	4.03132	79500	10.6735	79500	2.07216	79500	3.48815	79500	1.86938	79500	1.9867
79600	2.72558	79600	2.58811	79600	2.6021	79600	3.36386	79600	2.71971	79600	2.59095	79600	2.02619	79600	5.68801	79600	6.34479	79600	5.65093	79600	4.06505	79600	10.7204	79600	2.03038	79600	3.44496	79600	1.91885	79600	2.03012
79700	2.78222	79700	2.51836	79700	2.58778	79700	3.37583	79700	2.67839	79700	2.55693	79700	2.03638	79700	5.7141	79700	6.21634	79700	5.63464	79700	4.08275	79700	10.7877	79700	2.12856	79700	3.48133	79700	1.83744	79700	1.97417
79800	2.76645	79800	2.57787	79800	2.60281	79800	3.4377	79800	2.75743	79800	2.55164	79800	2.09023	79800	5.68685	79800	6.14976	79800	5.63992	79800	4.19023	79800	10.4818	79800	2.17988	79800	3.56113	79800	1.83143	79800	2.01439
79900	2.81124	79900	2.53345	79900	2.61066	79900	3.38386	79900	2.78359	79900	2.54556	79900	2.04381	79900	5.61591	79900	6.04081	79900	5.69245	79900	4.1682	79900	10.613	79900	2.2327	79900	3.44383	79900	1.78063	79900	2.08623
80000	2.71152	80000	2.46555	80000	2.62646	80000	3.43105	80000	2.73735	80000	2.48314	80000	2.07888	80000	5.69314	80000	5.97779	80000	5.66473	80000	4.24455	80000	10.6656	80000	2.20259	80000	3.37276	80000	1.76485	80000	1.95616
80100	2.61918	80100	2.46048	80100	2.67625	80100	3.43091	80100	2.75769	80100	2.44534	80100	2.08597	80100	5.65922	80100	5.85192	80100	5.72299	80100	4.33345	80100	10.6541	80100	2.26544	80100	3.41656	80100	1.75205	80100	1.99655
80200	2.71091	80200	2.52678	80200	2.65471	80200	3.42876	80200	2.7481	80200	2.45799	80200	2.08513	80200	5.84557	80200	6.08594	80200	5.74556	80200	4.38417	80200	10.6415	80200	2.18639	80200	3.3465	80200	1.79946	80200	1.95851
80300	2.75036	80300	2.5038	80300	2.728	80300	3.43428	80300	2.72337	80300	2.48159	80300	2.01018	80300	5.8177	80300	6.3278	80300	5.7601	80300	4.26086	80300	10.534	80300	2.19368	80300	3.41742	80300	1.8095	80300	1.99368
80400	2.72947	80400	2.46171	80400	2.61879	80400	3.45916	80400	2.77724	80400	2.45225	80400	2.04647	80400	5.61849	80400	6.11777	80400	5.72284	80400	4.4134	80400	10.5291	80400	2.1727	80400	3.50715	80400	1.81925	80400	1.95404
80500	2.79053	80500	2.38214	80500	2.58828	80500	3.40519	80500	2.75815	80500	2.45321	80500	2.05357	80500	5.563	80500	6.12659	80500	5.71694	80500	4.31461	80500	10.4554	80500	2.13872	80500	3.3705	80500	1.7654	80500	1.93576
80600	2.79269	80600	2.42789	80600	2.56669	80600	3.35915	80600	2.59168	80600	2.44679	80600	2.09059	80600	5.63547	80600	6.09542	80600	5.74634	80600	4.29308	80600	10.3973	80600	2.13691	80600	3.51066	80600	1.82819	80600	1.97604
80700	2.8132	80700	2.50351	80700	2.69177	80700	3.38156	80700	2.61665	80700	2.39472	80700	2.07338	80700	5.6101	80700	6.05733	80700	5.74402	80700	4.35383	80700	10.2688	80700	2.15853	80700	3.32832	80700	1.77285	80700	1.96496
80800	2.82055	80800	2.48612	80800	2.77845	80800	3.32921	80800	2.73006	80800	2.46465	80800	2.02947	80800	5.68166	80800	5.90306	80800	5.80104	80800	4.50756	80800	10.3866	80800	2.26829	80800	3.43612	80800	1.78948	80800	1.98873
80900	2.87182	80900	2.43238	80900	2.7515	80900	3.40023	80900	2.84518	80900	2.5077	80900	2.06383	80900	5.67499	80900	5.69902	80900	5.73798	80900	4.50393	80900	10.3824	80900	2.22431	80900	3.37517	80900	1.84442	80900	1.8955
81000	2.83633	81000	2.46042	81000	2.67353	81000	3.41447	81000	2.80118	81000	2.5597	81000	2.06729	81000	5.64235	81000	5.74911	81000	5.6926	81000	4.50725	81000	10.615	81000	2.21871	81000	3.3508	81000	1.85441	81000	2.01284
81100	2.78377	81100	2.50119	81100	2.65215	81100	3.41627	81100	2.66697	81100	2.58372	81100	2.02803	81100	5.61619	81100	5.80664	81100	5.72391	81100	4.57222	81100	10.5143	81100	2.13664	81100	3.44766	81100	1.845	81100	1.9837
81200	2.78626	81200	2.43504	81200	2.71882	81200	3.5125	81200	2.81262	81200	2.52904	81200	1.99814	81200	5.45468	81200	5.64149	81200	5.73633	81200	4.55546	81200	10.3559	81200	2.09683	81200	3.39309	81200	1.82113	81200	1.98353
81300	2.84615	81300	2.46237	81300	2.63197	81300	3.52694	81300	2.83727	81300	2.51234	81300	2.0206	81300	5.49146	81300	5.53003	81300	5.74354	81300	4.50475	81300	10.2851	81300	2.08882	81300	3.37306	81300	1.78465	81300	2.02453
81400	2.8027	81400	2.46319	81400	2.70121	81400	3.56879	81400	2.99237	81400	2.4885	81400	2.05014	81400	5.43804	81400	5.6525	81400	5.74971	81400	4.39295	81400	10.2295	81400	2.11366	81400	3.50762	81400	1.74869	81400	1.94169
81500	2.85537	81500	2.50745	81500	2.66988	81500	3.53189	81500	3.09766	81500	2.50265	81500	2.05514	81500	5.35478	81500	5.72416	81500	5.77538	81500	4.51091	81500	10.2014	81500	2.13897	81500	3.54838	81500	1.81184	81500	1.99908
81600	2.79258	81600	2.52435	81600	2.69856	81600	3.42644	81600	3.01678	81600	2.51268	81600	2.06436	81600	5.26484	81600	5.75696	81600	5.64082	81600	4.4482	81600	10.0216	81600	2.18522	81600	3.60213	81600	1.83866	81600	1.98525
81700	2.80958	81700	2.57132	81700	2.65382	81700	3.42853	81700	3.07666	81700	2.4739	81700	2.07035	81700	5.3683	81700	5.60395	81700	5.65744	81700	4.37426	81700	10.1838	81700	2.14385	81700	3.60058	81700	1.85403	81700	1.95331
81800	2.76278	81800	2.5264	81800	2.61346	81800	3.41861	81800	2.91711	81800	2.54772	81800	2.05017	81800	5.36249	81800	5.53228	81800	5.70851	81800	4.39114	81800	10.0855	81800	2.22442	81800	3.57535	81800	1.85312	81800	1.93125
81900	2.78913	81900	2.54176	81900	2.61275	81900	3.46269	81900	2.88321	81900	2.53303	81900	2.07858	81900	5.37362	81900	5.47435	81900	5.65072	81900	4.36702	81900	10.1426	81900	2.16882	81900	3.57181	81900	1.90509	81900	1.91432
82000	2.73289	82000	2.52816	82000	2.54969	82000	3.43424	82000	2.86989	82000	2.54538	82000	2.07204	82000	5.3793	82000	5.41865	82000	5.67233	82000	4.35149	82000	10.0995	82000	2.2033	82000	3.55723	82000	1.90745	82000	1.93497
82100	2.78416	82100	2.50959	82100	2.55829	82100	3.42863	82100	2.82935	82100	2.52395	82100	2.05665	82100	5.58056	82100	5.55119	82100	5.73754	82100	4.37532	82100	10.0843	82100	2.17678	82100	3.75043	82100	1.94358	82100	1.96137
82200	2.76145	82200	2.51004	82200	2.60622	82200	3.35036	82200	2.78449	82200	2.4424	82200	2.11618	82200	5.52881	82200	5.40459	82200	5.61305	82200	4.41693	82200	9.77723	82200	2.21227	82200	3.79116	82200	1.9253	82200	1.95002
82300	2.75694	82300	2.48058	82300	2.53102	82300	3.34009	82300	2.81911	82300	2.50768	82300	2.07525	82300	5.48592	82300	5.59702	82300	5.574	82300	4.45567	82300	9.8853	82300	2.1829	82300	3.82895	82300	1.90051	82300	1.89849
82400	2.7471	82400	2.57234	82400	2.44994	82400	3.46295	82400	2.82058	82400	2.54172	82400	2.14611	82400	5.46638	82400	5.7067	82400	5.56911	82400	4.5413	82400	9.79832	82400	2.11368	82400	3.89572	82400	1.92644	82400	1.96532
82500	2.74927	82500	2.50955	82500	2.51112	82500	3.38341	82500	2.89648	82500	2.52068	82500	2.13024	82500	5.47372	82500	5.59322	82500	5.61492	82500	4.57337	82500	9.86844	82500	2.24032	82500	3.79386	82500	1.93198	82500	1.97578
82600	2.73946	82600	2.5947	82600	2.58304	82600	3.41405	82600	2.94721	82600	2.4954	82600	2.15209	82600	5.52087	82600	5.41324	82600	5.71826	82600	4.83137	82600	9.89841	82600	2.14628	82600	3.91326	82600	1.87591	82600	2.03051
82700	2.73464	82700	2.56234	82700	2.65219	82700	3.43546	82700	2.92169	82700	2.4063	82700	2.10863	82700	5.56795	82700	5.51781	82700	5.69056	82700	4.78802	82700	9.88059	82700	2.13786	82700	3.86	82700	1.89972	82700	2.01856
82800	2.71578	82800	2.64403	82800	2.61759	82800	3.43621	82800	2.9173	82800	2.39141	82800	2.13911	82800	5.67855	82800	5.57755	82800	5.69253	82800	4.94905	82800	9.86811	82800	2.18092	82800	3.98993	82800	2.00025	82800	2.08339
82900	2.68532	82900	2.4391	82900	2.59467	82900	3.43002	82900	2.94006	82900	2.55083	82900	2.14217	82900	5.66184	82900	5.52797	82900	5.51707	82900	5.06393	82900	10.0171	82900	2.19992	82900	4.15563	82900	1.97837	82900	2.02963
83000	2.6606	83000	2.46517	83000	2.62759	83000	3.4524	83000	2.80913	83000	2.53287	83000	2.1069	83000	5.70509	83000	5.6076	83000	5.50122	83000	5.14206	83000	10.0332	83000	2.21316	83000	4.19642	83000	1.94031	83000	1.97348
83100	2.7132	83100	2.47572	83100	2.7093	83100	3.44047	83100	2.77909	83100	2.46973	83100	2.07968	83100	5.72342	83100	5.62972	83100	5.56086	83100	5.14654	83100	10.3482	83100	2.29693	83100	4.13498	83100	1.90334	83100	1.96818
83200	2.73933	83200	2.53167	83200	2.68748	83200	3.38239	83200	2.7261	83200	2.40102	83200	2.06351	83200	5.72059	83200	5.68347	83200	5.58205	83200	5.08205	83200	10.3858	83200	2.14655	83200	4.09306	83200	1.96489	83200	1.98309
83300	2.6748	83300	2.59976	83300	2.64861	83300	3.38417	83300	2.64833	83300	2.36368	83300	2.0562	83300	5.66654	83300	5.78459	83300	5.48322	83300	5.05634	83300	10.337	83300	2.18133	83300	4.10801	83300	2.05422	83300	1.97011
83400	2.76619	83400	2.56446	83400	2.62026	83400	3.29624	83400	2.57431	83400	2.41089	83400	2.04624	83400	5.528	83400	6.06523	83400	5.52591	83400	4.92875	83400	10.2946	83400	2.14376	83400	4.07915	83400	2.03117	83400	1.93263
83500	2.78266	83500	2.49081	83500	2.54448	83500	3.4611	83500	2.65546	83500	2.4247	83500	2.06691	83500	5.34157	83500	5.89968	83500	5.53206	83500	4.81144	83500	10.4856	83500	2.07128	83500	4.16434	83500	2.08132	83500	2.01531
83600	2.78305	83600	2.52591	83600	2.68395	83600	3.43187	83600	2.59622	83600	2.48698	83600	2.07741	83600	5.30063	83600	5.88962	83600	5.59229	83600	4.87513	83600	10.5717	83600	2.13751	83600	4.10844	83600	2.02492	83600	1.98491
83700	2.78819	83700	2.51778	83700	2.6867	83700	3.3943	83700	2.52604	83700	2.49686	83700	2.05458	83700	5.25586	83700	5.81907	83700	5.63979	83700	4.79038	83700	10.3653	83700	2.12931	83700	4.30336	83700	2.02954	83700	1.97706
83800	2.79818	83800	2.57473	83800	2.69938	83800	3.44043	83800	2.56063	83800	2.45274	83800	2.04392	83800	5.27634	83800	5.88499	83800	5.61202	83800	4.82984	83800	10.4238	83800	2.27175	83800	4.44409	83800	2.01921	83800	1.99715
83900	2.72416	83900	2.51623	83900	2.68242	83900	3.40205	83900	2.58	83900	2.50964	83900	2.04013	83900	5.48755	83900	5.97348	83900	5.49886	83900	4.83906	83900	10.5137	83900	2.32328	83900	4.46567	83900	1.9478	83900	2.05266
84000	2.86961	84000	2.48869	84000	2.71914	84000	3.36014	84000	2.56111	84000	2.48998	84000	2.02007	84000	5.42929	84000	5.98369	84000	5.60293	84000	4.8245	84000	10.5758	84000	2.277	84000	4.50064	84000	1.97435	84000	1.99354
84100	2.76568	84100	2.47812	84100	2.79951	84100	3.36054	84100	2.59266	84100	2.5335	84100	1.99597	84100	5.42381	84100	6.09432	84100	5.65989	84100	4.83129	84100	10.5148	84100	2.28752	84100	4.48195	84100	1.98422	84100	1.93823
84200	2.81357	84200	2.43814	84200	2.73326	84200	3.33441	84200	2.58104	84200	2.47776	84200	2.04095	84200	5.23672	84200	6.0795	84200	5.65492	84200	4.86496	84200	10.3639	84200	2.28755	84200	4.49328	84200	1.91499	84200	1.9437
84300	2.90179	84300	2.46315	84300	2.73329	84300	3.38565	84300	2.65101	84300	2.49052	84300	2.05887	84300	5.3336	84300	5.94066	84300	5.55364	84300	4.95897	84300	10.6027	84300	2.24864	84300	4.51571	84300	1.9086	84300	1.91104
84400	2.89425	84400	2.45956	84400	2.74115	84400	3.40842	84400	2.61142	84400	2.46363	84400	2.12711	84400	5.35702	84400	5.93854	84400	5.52126	84400	4.9317	84400	10.4577	84400	2.27499	84400	4.4144	84400	1.88126	84400	1.96763
84500	2.87006	84500	2.45616	84500	2.78924	84500	3.40476	84500	2.66512	84500	2.44576	84500	2.11376	84500	5.32774	84500	5.68628	84500	5.54006	84500	4.85763	84500	10.5641	84500	2.17502	84500	4.33651	84500	1.93838	84500	1.96538
84600	2.90999	84600	2.48094	84600	2.7429	84600	3.34425	84600	2.6845	84600	2.50145	84600	2.12117	84600	5.4319	84600	5.79345	84600	5.48146	84600	4.9185	84600	10.5192	84600	2.2668	84600	4.37303	84600	1.94188	84600	1.90091
84700	2.9331	84700	2.4819	84700	2.65716	84700	3.3501	84700	2.66692	84700	2.56681	84700	2.09661	84700	5.48806	84700	5.80646	84700	5.47734	84700	4.87654	84700	10.5766	84700	2.2301	84700	4.33507	84700	1.89095	84700	2.06118
84800	2.85283	84800	2.38864	84800	2.67856	84800	3.3952	84800	2.65345	84800	2.41048	84800	2.11619	84800	5.37777	84800	5.84317	84800	5.48518	84800	4.88455	84800	10.5782	84800	2.42017	84800	4.2723	84800	1.92522	84800	2.00696
84900	2.90816	84900	2.43452	84900	2.62032	84900	3.43248	84900	2.58026	84900	2.46209	84900	2.11741	84900	5.42895	84900	5.81161	84900	5.54035	84900	4.90096	84900	10.6952	84900	2.39428	84900	4.29508	84900	1.89262	84900	2.00994
85000	2.89881	85000	2.51387	85000	2.56049	85000	3.3823	85000	2.43031	85000	2.50849	85000	2.11991	85000	5.36304	85000	5.969	85000	5.52994	85000	4.84495	85000	10.4325	85000	2.29862	85000	4.13297	85000	1.88264	85000	2.01169
85100	2.95291	85100	2.53123	85100	2.57625	85100	3.46865	85100	2.43437	85100	2.48434	85100	2.13354	85100	5.33025	85100	6.09942	85100	5.50076	85100	4.96591	85100	10.5099	85100	2.38311	85100	4.15691	85100	1.89739	85100	2.03384
85200	2.95842	85200	2.51888	85200	2.55254	85200	3.37583	85200	2.34667	85200	2.42433	85200	2.15408	85200	5.42829	85200	6.20903	85200	5.58844	85200	4.99592	85200	10.7483	85200	2.37035	85200	4.23741	85200	1.91853	85200	2.03927
85300	2.91949	85300	2.47894	85300	2.63852	85300	3.38891	85300	2.24346	85300	2.42831	85300	2.1898	85300	5.32981	85300	6.28499	85300	5.57339	85300	5.05072	85300	10.6081	85300	2.34867	85300	4.37713	85300	1.90449	85300	1.99039
85400	2.88808	85400	2.50838	85400	2.59194	85400	3.3297	85400	2.31638	85400	2.41402	85400	2.21418	85400	5.3375	85400	6.18644	85400	5.56482	85400	4.95455	85400	10.5288	85400	2.33541	85400	4.33788	85400	1.92275	85400	1.94376
85500	2.83866	85500	2.39339	85500	2.57989	85500	3.33856	85500	2.30612	85500	2.37256	85500	2.19053	85500	5.4455	85500	5.94574	85500	5.46379	85500	4.84182	85500	10.6534	85500	2.21386	85500	4.3835	85500	1.88578	85500	1.94112
85600	2.83692	85600	2.50884	85600	2.65948	85600	3.37474	85600	2.28446	85600	2.37179	85600	2.14123	85600	5.52761	85600	5.82689	85600	5.47885	85600	4.70214	85600	10.8094	85600	2.15739	85600	4.46343	85600	1.92154	85600	1.90951
85700	2.80958	85700	2.53019	85700	2.64813	85700	3.37579	85700	2.22776	85700	2.35886	85700	2.08467	85700	5.51997	85700	5.76238	85700	5.51112	85700	4.76545	85700	10.7424	85700	2.25226	85700	4.42388	85700	1.95767	85700	1.93804
85800	2.8671	85800	2.47846	85800	2.73976	85800	3.25587	85800	2.28664	85800	2.28974	85800	2.11799	85800	5.55575	85800	5.69887	85800	5.51644	85800	4.75829	85800	10.6826	85800	2.23306	85800	4.48206	85800	1.95403	85800	1.95272
85900	2.78522	85900	2.52619	85900	2.7095	85900	3.24844	85900	2.27808	85900	2.28402	85900	2.19252	85900	5.55432	85900	5.56902	85900	5.46431	85900	4.85252	85900	10.5847	85900	2.27523	85900	4.57167	85900	2.02455	85900	2.04898
86000	2.78062	86000	2.53014	86000	2.67872	86000	3.27641	86000	2.35827	86000	2.30579	86000	2.23094	86000	5.54341	86000	5.56429	86000	5.56597	86000	4.84667	86000	10.638	86000	2.36687	86000	4.49414	86000	2.02404	86000	2.01811
86100	2.72314	86100	2.5916	86100	2.67729	86100	3.27046	86100	2.33524	86100	2.27765	86100	2.20107	86100	5.53375	86100	5.50975	86100	5.51058	86100	4.83473	86100	10.8889	86100	2.34799	86100	4.70317	86100	1.96062	86100	2.01497
86200	2.77238	86200	2.51512	86200	2.65186	86200	3.34547	86200	2.2862	86200	2.2053	86200	2.14401	86200	5.40468	86200	5.53168	86200	5.50616	86200	4.8885	86200	10.8755	86200	2.36585	86200	4.66529	86200	1.98341	86200	1.95647
86300	2.77872	86300	2.49932	86300	2.61304	86300	3.30553	86300	2.22556	86300	2.31511	86300	2.16249	86300	5.31218	86300	5.63664	86300	5.49007	86300	4.8706	86300	10.7223	86300	2.33147	86300	4.71233	86300	2.00236	86300	1.96342
86400	2.80016	86400	2.52582	86400	2.63872	86400	3.22784	86400	2.28943	86400	2.41511	86400	2.11296	86400	5.3874	86400	5.58799	86400	5.51374	86400	4.70813	86400	10.6806	86400	2.34993	86400	4.55098	86400	1.97287	86400	2.04488
86500	2.73689	86500	2.50605	86500	2.64126	86500	3.21075	86500	2.25388	86500	2.39844	86500	2.02993	86500	5.39533	86500	5.54828	86500	5.5056	86500	4.70319	86500	10.779	86500	2.30393	86500	4.51284	86500	1.92533	86500	1.91533
86600	2.78529	86600	2.47314	86600	2.58754	86600	3.22061	86600	2.22531	86600	2.41552	86600	2.04514	86600	5.33798	86600	5.46545	86600	5.42417	86600	4.53589	86600	10.6097	86600	2.34496	86600	4.42479	86600	1.95748	86600	1.94457
86700	2.78142	86700	2.51161	86700	2.60833	86700	3.18157	86700	2.21166	86700	2.41717	86700	2.01107	86700	5.45432	86700	5.24656	86700	5.45583	86700	4.57669	86700	10.5622	86700	2.39959	86700	4.32133	86700	1.93299	86700	1.97533
86800	2.74933	86800	2.55438	86800	2.62602	86800	3.14348	86800	2.23374	86800	2.40798	86800	2.03443	86800	5.47051	86800	5.11608	86800	5.41749	86800	4.49439	86800	10.4598	86800	2.3687	86800	4.23329	86800	1.98183	86800	1.9886
86900	2.79202	86900	2.588	86900	2.57287	86900	3.17186	86900	2.23334	86900	2.32157	86900	1.99335	86900	5.53877	86900	5.09842	86900	5.46979	86900	4.57067	86900	10.5274	86900	2.48535	86900	4.36293	86900	1.98183	86900	1.99641
87000	2.79046	87000	2.56465	87000	2.64341	87000	3.09235	87000	2.3218	87000	2.31737	87000	2.05217	87000	5.55904	87000	4.93753	87000	5.54267	87000	4.55964	87000	10.6791	87000	2.48365	87000	4.34026	87000	1.92393	87000	2.01604
87100	2.86599	87100	2.5813	87100	2.61661	87100	3.1531	87100	2.35236	87100	2.32637	87100	2.02375	87100	5.51941	87100	4.81254	87100	5.55619	87100	4.6704	87100	10.7959	87100	2.5059	87100	4.14575	87100	1.96192	87100	2.06271
87200	2.84266	87200	2.53472	87200	2.71187	87200	3.32314	87200	2.31669	87200	2.29535	87200	1.99392	87200	5.49788	87200	4.84526	87200	5.49705	87200	4.56526	87200	10.6408	87200	2.43181	87200	4.08422	87200	2.01513	87200	2.04749
87300	2.81731	87300	2.46179	87300	2.73039	87300	3.27478	87300	2.34229	87300	2.27634	87300	1.88451	87300	5.53944	87300	4.82763	87300	5.52233	87300	4.47595	87300	10.8208	87300	2.35528	87300	4.20572	87300	1.98123	87300	1.96734
87400	2.79773	87400	2.49387	87400	2.7408	87400	3.21084	87400	2.30331	87400	2.3054	87400	1.87895	87400	5.47678	87400	4.85117	87400	5.53348	87400	4.57212	87400	10.8074	87400	2.42403	87400	4.30222	87400	1.93972	87400	1.97609
87500	2.82742	87500	2.51674	87500	2.64143	87500	3.3016	87500	2.30209	87500	2.27781	87500	1.87384	87500	5.50186	87500	4.75518	87500	5.55632	87500	4.68285	87500	10.655	87500	2.49722	87500	4.38946	87500	1.92791	87500	1.98415
87600	2.80278	87600	2.55966	87600	2.61154	87600	3.336	87600	2.32689	87600	2.3179	87600	1.93212	87600	5.54618	87600	4.88106	87600	5.57662	87600	4.67956	87600	10.9133	87600	2.46495	87600	4.28163	87600	1.93848	87600	1.99694
87700	2.73064	87700	2.60287	87700	2.51839	87700	3.32887	87700	2.42822	87700	2.23189	87700	1.90104	87700	5.6651	87700	4.93342	87700	5.57304	87700	4.64138	87700	10.9911	87700	2.45283	87700	4.35216	87700	1.96252	87700	1.99942
87800	2.75192	87800	2.57528	87800	2.55927	87800	3.31788	87800	2.37896	87800	2.2448	87800	1.96622	87800	5.66744	87800	5.06295	87800	5.53525	87800	4.67631	87800	10.853	87800	2.42515	87800	4.45872	87800	1.96096	87800	1.96277
87900	2.72313	87900	2.55281	87900	2.53473	87900	3.33145	87900	2.40961	87900	2.31191	87900	1.92542	87900	5.73924	87900	4.9044	87900	5.58624	87900	4.49914	87900	10.6977	87900	2.41968	87900	4.30489	87900	1.99259	87900	1.98425
88000	2.77367	88000	2.52697	88000	2.58408	88000	3.32992	88000	2.37021	88000	2.34747	88000	2.05253	88000	5.78798	88000	4.69256	88000	5.58541	88000	4.6049	88000	10.8096	88000	2.49637	88000	4.30582	88000	1.93023	88000	1.94724
88100	2.85238	88100	2.48986	88100	2.51371	88100	3.30771	88100	2.38191	88100	2.30911	88100	2.12705	88100	5.76016	88100	4.79113	88100	5.55767	88100	4.54886	88100	10.7733	88100	2.4086	88100	4.30497	88100	2.01221	88100	1.90272
88200	2.84633	88200	2.50426	88200	2.45173	88200	3.25293	88200	2.44343	88200	2.26405	88200	2.05531	88200	5.65739	88200	4.72749	88200	5.47548	88200	4.7026	88200	10.7639	88200	2.38675	88200	4.18098	88200	1.97666	88200	1.89772
88300	2.78709	88300	2.45488	88300	2.43327	88300	3.24018	88300	2.46967	88300	2.34886	88300	1.97031	88300	5.79753	88300	4.60834	88300	5.51251	88300	4.58206	88300	10.7913	88300	2.50164	88300	4.18	88300	1.97718	88300	1.97146
88400	2.77494	88400	2.50771	88400	2.4082	88400	3.2402	88400	2.50062	88400	2.30018	88400	2.01844	88400	5.74356	88400	4.61895	88400	5.52266	88400	4.76741	88400	10.9125	88400	2.3927	88400	4.19534	88400	2.00595	88400	1.96872
88500	2.69261	88500	2.54999	88500	2.47251	88500	3.24217	88500	2.42753	88500	2.39921	88500	2.16588	88500	5.80414	88500	4.70816	88500	5.40827	88500	4.64902	88500	10.9073	88500	2.41773	88500	4.14416	88500	1.96467	88500	1.9027
88600	2.71665	88600	2.53613	88600	2.40916	88600	3.25438	88600	2.43553	88600	2.37749	88600	2.23341	88600	5.82876	88600	4.76019	88600	5.41044	88600	4.51241	88600	10.6918	88600	2.44219	88600	4.10752	88600	1.95516	88600	1.92256
88700	2.70337	88700	2.57693	88700	2.36724	88700	3.23277	88700	2.43754	88700	2.36203	88700	2.30715	88700	5.72943	88700	4.77127	88700	5.4129	88700	4.4764	88700	10.8629	88700	2.43312	88700	4.06019	88700	2.02437	88700	1.97961
88800	2.80331	88800	2.58678	88800	2.39482	88800	3.18409	88800	2.40601	88800	2.33387	88800	2.30544	88800	5.66383	88800	4.76381	88800	5.53543	88800	4.34776	88800	10.8103	88800	2.36953	88800	4.04724	88800	1.98068	88800	1.96275
88900	2.80186	88900	2.60196	88900	2.42424	88900	3.25023	88900	2.47342	88900	2.3331	88900	2.28978	88900	5.53513	88900	4.78218	88900	5.47833	88900	4.51625	88900	10.7806	88900	2.42187	88900	3.96328	88900	1.9169	88900	1.98005
89000	2.82502	89000	2.60002	89000	2.34426	89000	3.26829	89000	2.48603	89000	2.33732	89000	2.30812	89000	5.60346	89000	4.88212	89000	5.4207	89000	4.4334	89000	10.739	89000	2.30339	89000	4.15308	89000	1.95394	89000	1.97908
89100	2.77953	89100	2.56369	89100	2.25389	89100	3.27895	89100	2.44473	89100	2.34082	89100	2.23309	89100	5.61467	89100	4.92756	89100	5.44491	89100	4.44351	89100	10.7457	89100	2.3383	89100	4.18712	89100	1.90303	89100	1.92393
89200	2.77336	89200	2.57417	89200	2.26994	89200	3.29779	89200	2.42029	89200	2.28621	89200	2.2587	89200	5.58369	89200	4.88546	89200	5.42084	89200	4.4947	89200	10.9091	89200	2.47614	89200	4.28812	89200	1.94287	89200	1.95677
89300	2.72962	89300	2.55349	89300	2.37968	89300	3.34641	89300	2.38979	89300	2.27752	89300	2.33575	89300	5.64174	89300	4.86035	89300	5.43787	89300	4.42389	89300	11.0177	89300	2.45677	89300	4.33006	89300	1.9888	89300	2.02148
89400	2.82881	89400	2.59025	89400	2.40442	89400	3.26499	89400	2.41516	89400	2.23934	89400	2.39752	89400	5.63653	89400	4.79667	89400	5.3927	89400	4.44424	89400	11.1295	89400	2.41184	89400	4.39052	89400	1.98738	89400	1.96999
89500	2.87718	89500	2.53403	89500	2.40103	89500	3.21957	89500	2.45398	89500	2.29228	89500	2.36631	89500	5.70654	89500	4.77993	89500	5.38352	89500	4.58036	89500	11.0838	89500	2.43653	89500	4.37019	89500	1.96814	89500	2.00006
89600	2.85786	89600	2.57359	89600	2.42575	89600	3.272	89600	2.41592	89600	2.3361	89600	2.37667	89600	5.74582	89600	4.81633	89600	5.32733	89600	4.58941	89600	11.052	89600	2.46721	89600	4.47188	89600	1.98146	89600	2.04866
89700	2.78671	89700	2.59713	89700	2.38329	89700	3.34688	89700	2.44524	89700	2.32863	89700	2.44182	89700	5.67934	89700	4.87354	89700	5.36368	89700	4.56197	89700	11.0634	89700	2.60656	89700	4.66515	89700	1.96126	89700	2.05747
89800	2.77938	89800	2.62534	89800	2.3501	89800	3.43897	89800	2.43731	89800	2.20874	89800	2.4544	89800	5.52578	89800	4.88394	89800	5.28439	89800	4.4698	89800	10.8658	89800	2.68893	89800	4.66034	89800	1.97939	89800	2.20185
89900	2.78765	89900	2.60451	89900	2.32801	89900	3.47231	89900	2.46736	89900	2.2074	89900	2.47688	89900	5.57505	89900	4.90959	89900	5.46165	89900	4.54998	89900	10.5695	89900	2.69863	89900	4.63459	89900	2.00716	89900	2.19888
90000	2.85393	90000	2.627	90000	2.2378	90000	3.45138	90000	2.47893	90000	2.1824	90000	2.36263	90000	5.63804	90000	5.0076	90000	5.51751	90000	4.62755	90000	10.5049	90000	2.65332	90000	4.72226	90000	1.9775	90000	2.18222
90100	2.86146	90100	2.6494	90100	2.17877	90100	3.47718	90100	2.42722	90100	2.20089	90100	2.40188	90100	5.64514	90100	4.93523	90100	5.42041	90100	4.51301	90100	10.5487	90100	2.6558	90100	4.71403	90100	1.92775	90100	2.14571
90200	2.75778	90200	2.5882	90200	2.21729	90200	3.4198	90200	2.43319	90200	2.14927	90200	2.47138	90200	5.77098	90200	4.97039	90200	5.49295	90200	4.57286	90200	10.6201	90200	2.63363	90200	4.53828	90200	1.93246	90200	2.16089
90300	2.71499	90300	2.65484	90300	2.20842	90300	3.37623	90300	2.42268	90300	2.22399	90300	2.51013	90300	5.71777	90300	4.96111	90300	5.43293	90300	4.52128	90300	10.4479	90300	2.58784	90300	4.62016	90300	1.97469	90300	2.0747
90400	2.69105	90400	2.6195	90400	2.2496	90400	3.34962	90400	2.36937	90400	2.21801	90400	2.53722	90400	5.83826	90400	4.96986	90400	5.32469	90400	4.51686	90400	10.5625	90400	2.49494	90400	4.60883	90400	1.92233	90400	2.06422
90500	2.71007	90500	2.62345	90500	2.20632	90500	3.38961	90500	2.38364	90500	2.26636	90500	2.55041	90500	5.89756	90500	4.96731	90500	5.44541	90500	4.36261	90500	10.5078	90500	2.41595	90500	4.31417	90500	1.85518	90500	2.01472
90600	2.72816	90600	2.65246	90600	2.21161	90600	3.34213	90600	2.42509	90600	2.11487	90600	2.51999	90600	5.95175	90600	4.98822	90600	5.44814	90600	4.34632	90600	10.4365	90600	2.43869	90600	4.11407	90600	1.833	90600	2.08913
90700	2.68146	90700	2.67561	90700	2.20025	90700	3.30716	90700	2.43498	90700	2.12348	90700	2.4967	90700	5.82362	90700	4.89498	90700	5.5077	90700	4.26132	90700	10.4736	90700	2.416	90700	4.16914	90700	1.86246	90700	2.10824
90800	2.68758	90800	2.70611	90800	2.20074	90800	3.36743	90800	2.41051	90800	2.15835	90800	2.49126	90800	5.73239	90800	4.84146	90800	5.50377	90800	4.35677	90800	10.5881	90800	2.48642	90800	4.13034	90800	1.92542	90800	2.15573
90900	2.69144	90900	2.62673	90900	2.16419	90900	3.44647	90900	2.44854	90900	2.14865	90900	2.46631	90900	5.69923	90900	4.81551	90900	5.62794	90900	4.35401	90900	10.4177	90900	2.65461	90900	4.1292	90900	1.83428	90900	2.19952
91000	2.70541	91000	2.51942	91000	2.20006	91000	3.46808	91000	2.46248	91000	2.16864	91000	2.61369	91000	5.68924	91000	4.88016	91000	5.56752	91000	4.37858	91000	10.2669	91000	2.62744	91000	4.06812	91000	1.88932	91000	2.08311
91100	2.71805	91100	2.5617	91100	2.19392	91100	3.43266	91100	2.43538	91100	2.19322	91100	2.55481	91100	5.76509	91100	4.92886	91100	5.58876	91100	4.34539	91100	10.2276	91100	2.69447	91100	4.08306	91100	1.89946	91100	2.15913
91200	2.59427	91200	2.4825	91200	2.2346	91200	3.44297	91200	2.38248	91200	2.11155	91200	2.48771	91200	5.65712	91200	5.06568	91200	5.53345	91200	4.37181	91200	10.203	91200	2.64948	91200	3.98974	91200	1.91666	91200	2.15705
91300	2.66942	91300	2.44202	91300	2.18352	91300	3.54711	91300	2.4062	91300	2.05686	91300	2.44432	91300	5.59154	91300	4.99761	91300	5.61149	91300	4.29592	91300	10.1199	91300	2.61771	91300	3.88854	91300	1.95982	91300	2.16102
91400	2.73487	91400	2.50089	91400	2.18745	91400	3.6041	91400	2.41536	91400	2.15833	91400	2.39788	91400	5.55402	91400	5.12427	91400	5.52067	91400	4.36025	91400	9.98315	91400	2.61302	91400	3.92201	91400	1.91479	91400	2.20312
91500	2.76052	91500	2.48367	91500	2.23321	91500	3.48438	91500	2.39226	91500	2.24776	91500	2.38586	91500	5.69256	91500	5.09138	91500	5.64105	91500	4.28505	91500	10.1857	91500	2.7045	91500	3.96866	91500	1.88511	91500	2.23777
91600	2.7512	91600	2.45104	91600	2.23831	91600	3.44566	91600	2.40059	91600	2.29624	91600	2.39064	91600	5.68194	91600	5.27601	91600	5.6741	91600	4.40545	91600	10.0817	91600	2.81518	91600	4.08057	91600	1.90778	91600	2.19941
91700	2.73487	91700	2.44859	91700	2.28303	91700	3.41639	91700	2.37215	91700	2.2192	91700	2.35058	91700	5.6018	91700	5.19353	91700	5.53099	91700	4.44256	91700	10.1041	91700	2.88758	91700	4.07926	91700	1.91736	91700	2.20589
91800	2.77922	91800	2.48881	91800	2.26614	91800	3.52352	91800	2.33812	91800	2.26525	91800	2.41684	91800	5.57146	91800	5.26811	91800	5.45093	91800	4.49049	91800	10.072	91800	2.86629	91800	3.9809	91800	1.94617	91800	2.21932
91900	2.7412	91900	2.45844	91900	2.22195	91900	3.41213	91900	2.36463	91900	2.26854	91900	2.53216	91900	5.61593	91900	5.37431	91900	5.52399	91900	4.50537	91900	10.1986	91900	2.74338	91900	3.97408	91900	1.94877	91900	2.21375
92000	2.75553	92000	2.48855	92000	2.30311	92000	3.3666	92000	2.48818	92000	2.3026	92000	2.50357	92000	5.47032	92000	5.28933	92000	5.55919	92000	4.47728	92000	10.1135	92000	2.69856	92000	4.08876	92000	1.97287	92000	2.20272
92100	2.79419	92100	2.49545	92100	2.2844	92100	3.34293	92100	2.51643	92100	2.21749	92100	2.52112	92100	5.7733	92100	5.14884	92100	5.44608	92100	4.44008	92100	10.1033	92100	2.72806	92100	4.09813	92100	1.8611	92100	2.34745
92200	2.79083	92200	2.51462	92200	2.29738	92200	3.31345	92200	2.44568	92200	2.1924	92200	2.48549	92200	5.68215	92200	5.11359	92200	5.49995	92200	4.45301	92200	10.0786	92200	2.85043	92200	3.95424	92200	1.808	92200	2.35331
92300	2.82782	92300	2.5132	92300	2.30905	92300	3.34053	92300	2.47114	92300	2.13157	92300	2.57327	92300	5.60452	92300	5.12817	92300	5.42575	92300	4.30664	92300	10.2653	92300	2.75494	92300	3.9955	92300	1.83521	92300	2.2765
92400	2.7292	92400	2.44458	92400	2.3555	92400	3.37218	92400	2.48569	92400	2.05777	92400	2.51114	92400	5.56363	92400	5.20061	92400	5.49447	92400	4.38844	92400	10.4836	92400	2.72941	92400	3.92811	92400	1.86438	92400	2.31113
92500	2.82146	92500	2.48785	92500	2.34568	92500	3.45307	92500	2.4174	92500	2.1004	92500	2.62136	92500	5.59855	92500	5.30196	92500	5.54916	92500	4.48204	92500	10.7498	92500	2.75943	92500	4.12297	92500	1.94189	92500	2.38895
92600	2.84647	92600	2.42223	92600	2.22911	92600	3.38733	92600	2.40052	92600	2.14223	92600	2.61074	92600	5.6658	92600	5.45844	92600	5.59927	92600	4.41848	92600	10.8418	92600	2.61354	92600	4.08321	92600	1.92904	92600	2.32308
92700	2.79707	92700	2.47279	92700	2.24312	92700	3.36311	92700	2.33628	92700	2.13024	92700	2.61065	92700	5.68179	92700	5.52437	92700	5.56825	92700	4.37144	92700	10.8207	92700	2.57939	92700	4.04488	92700	1.94866	92700	2.32876
92800	2.801	92800	2.41456	92800	2.26089	92800	3.4467	92800	2.45413	92800	2.09842	92800	2.58375	92800	5.59322	92800	5.4453	92800	5.52968	92800	4.4419	92800	10.859	92800	2.67614	92800	4.25619	92800	1.96267	92800	2.28283
92900	2.75902	92900	2.37853	92900	2.27942	92900	3.45679	92900	2.42931	92900	2.14777	92900	2.51199	92900	5.6594	92900	5.4308	92900	5.55689	92900	4.36366	92900	10.8555	92900	2.68827	92900	4.12656	92900	1.97317	92900	2.2031
93000	2.68642	93000	2.35962	93000	2.25642	93000	3.42851	93000	2.41066	93000	2.07237	93000	2.54751	93000	5.71962	93000	5.47306	93000	5.5011	93000	4.39941	93000	10.7899	93000	2.68673	93000	3.99308	93000	1.94023	93000	2.19919
93100	2.72032	93100	2.42026	93100	2.28113	93100	3.32109	93100	2.51861	93100	2.13972	93100	2.48763	93100	5.57208	93100	5.44041	93100	5.5442	93100	4.4065	93100	10.572	93100	2.66685	93100	4.01847	93100	1.91969	93100	2.20631
93200	2.66434	93200	2.37769	93200	2.27455	93200	3.39626	93200	2.42571	93200	2.12128	93200	2.46469	93200	5.672	93200	5.41537	93200	5.69237	93200	4.33969	93200	10.6832	93200	2.71158	93200	3.98585	93200	1.88202	93200	2.24593
93300	2.7404	93300	2.42908	93300	2.24823	93300	3.44036	93300	2.43639	93300	2.21023	93300	2.52089	93300	5.70967	93300	5.46409	93300	5.52974	93300	4.3489	93300	10.719	93300	2.75688	93300	3.93584	93300	1.85675	93300	2.27693
93400	2.74398	93400	2.36126	93400	2.27939	93400	3.47911	93400	2.43967	93400	2.27545	93400	2.43997	93400	5.74735	93400	5.44026	93400	5.63499	93400	4.37648	93400	10.6118	93400	2.72982	93400	3.8887	93400	1.83803	93400	2.34602
93500	2.63145	93500	2.40341	93500	2.28725	93500	3.4463	93500	2.44988	93500	2.22484	93500	2.41799	93500	5.73985	93500	5.5997	93500	5.47734	93500	4.44173	93500	10.5622	93500	2.71344	93500	3.91627	93500	1.91597	93500	2.22497
93600	2.68487	93600	2.39107	93600	2.22684	93600	3.41523	93600	2.37064	93600	2.26309	93600	2.54376	93600	5.7451	93600	5.52029	93600	5.46179	93600	4.39261	93600	10.5216	93600	2.65326	93600	3.75383	93600	1.88271	93600	2.21801
93700	2.71541	93700	2.45993	93700	2.29995	93700	3.42144	93700	2.38107	93700	2.24987	93700	2.55342	93700	5.61621	93700	5.4967	93700	5.41915	93700	4.29241	93700	10.3218	93700	2.70652	93700	3.72902	93700	1.90248	93700	2.25762
93800	2.79216	93800	2.49035	93800	2.26756	93800	3.36219	93800	2.42977	93800	2.26538	93800	2.63368	93800	5.62266	93800	5.53824	93800	5.4658	93800	4.35656	93800	10.3747	93800	2.72563	93800	3.73741	93800	1.84499	93800	2.19912
93900	2.69459	93900	2.47188	93900	2.27926	93900	3.3909	93900	2.47292	93900	2.24439	93900	2.77573	93900	5.64586	93900	5.58785	93900	5.44441	93900	4.34079	93900	10.4113	93900	2.66821	93900	3.67811	93900	1.78441	93900	2.30132
94000	2.739	94000	2.44008	94000	2.31817	94000	3.35876	94000	2.43104	94000	2.31141	94000	2.72572	94000	5.58973	94000	5.50424	94000	5.46899	94000	4.33672	94000	10.4942	94000	2.64813	94000	3.74715	94000	1.82816	94000	2.24935
94100	2.75748	94100	2.48729	94100	2.33643	94100	3.36491	94100	2.49779	94100	2.25991	94100	2.77924	94100	5.42907	94100	5.52891	94100	5.4441	94100	4.28082	94100	10.4402	94100	2.68626	94100	3.81029	94100	1.89526	94100	2.23007
94200	2.76677	94200	2.46405	94200	2.3311	94200	3.30574	94200	2.56843	94200	2.20952	94200	2.87773	94200	5.36045	94200	5.40721	94200	5.49835	94200	4.34834	94200	10.3051	94200	2.71829	94200	3.88582	94200	1.89155	94200	2.28733
94300	2.75365	94300	2.59693	94300	2.31177	94300	3.33037	94300	2.57151	94300	2.22915	94300	2.80673	94300	5.23953	94300	5.36952	94300	5.42709	94300	4.25716	94300	10.4978	94300	2.65856	94300	3.88542	94300	1.94254	94300	2.22941
94400	2.74722	94400	2.5478	94400	2.33208	94400	3.43227	94400	2.60751	94400	2.31355	94400	2.75766	94400	5.50011	94400	5.27286	94400	5.49055	94400	4.308	94400	10.4757	94400	2.77498	94400	3.87057	94400	2.02247	94400	2.24331
94500	2.73656	94500	2.52217	94500	2.31439	94500	3.37869	94500	2.62773	94500	2.16831	94500	2.84159	94500	5.65278	94500	5.19789	94500	5.40479	94500	4.42893	94500	10.5068	94500	2.78717	94500	3.9015	94500	1.9704	94500	2.36286
94600	2.7599	94600	2.58431	94600	2.30771	94600	3.4889	94600	2.66553	94600	2.14781	94600	2.85237	94600	5.63207	94600	5.18082	94600	5.48645	94600	4.46821	94600	10.4027	94600	2.76857	94600	3.9434	94600	1.99209	94600	2.30219
94700	2.76348	94700	2.65879	94700	2.28313	94700	3.40677	94700	2.72778	94700	2.14122	94700	2.81976	94700	5.62267	94700	5.16024	94700	5.41426	94700	4.61177	94700	10.5491	94700	2.70936	94700	3.8687	94700	1.972	94700	2.39046
94800	2.81259	94800	2.55876	94800	2.28879	94800	3.43564	94800	2.70131	94800	2.12451	94800	2.71002	94800	5.65723	94800	5.15539	94800	5.41403	94800	4.59388	94800	10.492	94800	2.66375	94800	3.9112	94800	1.94695	94800	2.36865
94900	2.82717	94900	2.48473	94900	2.25667	94900	3.47492	94900	2.66047	94900	2.18136	94900	2.70764	94900	5.69329	94900	5.1811	94900	5.43741	94900	4.57766	94900	10.3498	94900	2.71879	94900	4.04081	94900	1.95073	94900	2.39553
95000	2.78884	95000	2.54549	95000	2.28079	95000	3.39854	95000	2.77166	95000	2.22479	95000	2.76178	95000	5.54752	95000	5.18817	95000	5.44374	95000	4.56396	95000	10.4562	95000	2.78991	95000	4.21179	95000	2.02604	95000	2.44888
95100	2.76601	95100	2.55626	95100	2.29583	95100	3.40734	95100	2.72558	95100	2.2445	95100	2.82753	95100	5.4489	95100	5.19435	95100	5.58916	95100	4.51073	95100	10.4393	95100	2.77686	95100	4.15034	95100	2.07801	95100	2.30158
95200	2.75017	95200	2.52798	95200	2.26199	95200	3.47436	95200	2.61806	95200	2.2128	95200	2.81235	95200	5.57507	95200	5.10806	95200	5.53189	95200	4.55696	95200	10.3559	95200	2.77312	95200	4.09142	95200	2.06064	95200	2.27973
95300	2.71663	95300	2.55609	95300	2.24137	95300	3.41511	95300	2.73208	95300	2.17832	95300	2.92	95300	5.61603	95300	5.09313	95300	5.50223	95300	4.47967	95300	10.2493	95300	2.66053	95300	3.91901	95300	2.05973	95300	2.30084
95400	2.74447	95400	2.50667	95400	2.2601	95400	3.38438	95400	2.66485	95400	2.18319	95400	2.86788	95400	5.53491	95400	5.1113	95400	5.43355	95400	4.33647	95400	10.3246	95400	2.64234	95400	3.6991	95400	2.19013	95400	2.28059
95500	2.81301	95500	2.56865	95500	2.27117	95500	3.45549	95500	2.68541	95500	2.16703	95500	2.91556	95500	5.64527	95500	5.11675	95500	5.35623	95500	4.22895	95500	10.4016	95500	2.59022	95500	3.67248	95500	2.19803	95500	2.25369
95600	2.78815	95600	2.50098	95600	2.25274	95600	3.4197	95600	2.68079	95600	2.23437	95600	2.81213	95600	5.62438	95600	5.24718	95600	5.4254	95600	4.22036	95600	10.2755	95600	2.59332	95600	3.68934	95600	2.09296	95600	2.22879
95700	2.79149	95700	2.53422	95700	2.24185	95700	3.45912	95700	2.69777	95700	2.19881	95700	2.82318	95700	5.53565	95700	5.21001	95700	5.31012	95700	4.21978	95700	10.2811	95700	2.66833	95700	3.55667	95700	2.05374	95700	2.25968
95800	2.78013	95800	2.60426	95800	2.25526	95800	3.48581	95800	2.63992	95800	2.20557	95800	2.82674	95800	5.5029	95800	5.01759	95800	5.45116	95800	4.21622	95800	10.567	95800	2.69831	95800	3.58669	95800	2.14871	95800	2.31602
95900	2.69971	95900	2.65054	95900	2.24449	95900	3.49348	95900	2.67965	95900	2.13938	95900	2.72944	95900	5.55881	95900	4.99568	95900	5.42781	95900	4.34974	95900	10.6269	95900	2.74755	95900	3.51394	95900	2.13672	95900	2.32961
96000	2.71936	96000	2.6537	96000	2.2413	96000	3.43234	96000	2.65544	96000	2.18828	96000	2.68223	96000	5.60902	96000	5.05687	96000	5.41978	96000	4.3492	96000	10.9421	96000	2.80147	96000	3.61645	96000	2.03228	96000	2.33192
96100	2.7731	96100	2.65708	96100	2.25846	96100	3.48516	96100	2.65013	96100	2.11412	96100	2.62633	96100	5.58137	96100	5.18691	96100	5.49835	96100	4.33198	96100	10.9634	96100	2.75477	96100	3.61685	96100	2.18044	96100	2.29577
96200	2.64908	96200	2.6027	96200	2.22603	96200	3.46466	96200	2.57419	96200	2.13773	96200	2.72	96200	5.64164	96200	5.11894	96200	5.42302	96200	4.3297	96200	11.0065	96200	2.80483	96200	3.61939	96200	2.18297	96200	2.31991
96300	2.68603	96300	2.64263	96300	2.26016	96300	3.47787	96300	2.53679	96300	2.26815	96300	2.71815	96300	5.83979	96300	5.12943	96300	5.47429	96300	4.26832	96300	11.0187	96300	2.79871	96300	3.69827	96300	2.14478	96300	2.30531
96400	2.66259	96400	2.63553	96400	2.28923	96400	3.5265	96400	2.57911	96400	2.32889	96400	2.75426	96400	5.73054	96400	5.14115	96400	5.40496	96400	4.26118	96400	10.8819	96400	2.7852	96400	3.67857	96400	2.13216	96400	2.37191
96500	2.65636	96500	2.61779	96500	2.32687	96500	3.53541	96500	2.59513	96500	2.29519	96500	2.76626	96500	5.86826	96500	5.19162	96500	5.52808	96500	4.19666	96500	10.8454	96500	2.77513	96500	3.6968	96500	2.19458	96500	2.28751
96600	2.72178	96600	2.62775	96600	2.31216	96600	3.61603	96600	2.64433	96600	2.27914	96600	2.78994	96600	5.72587	96600	5.1542	96600	5.40408	96600	4.30306	96600	10.964	96600	2.79142	96600	3.66612	96600	2.19302	96600	2.28724
96700	2.65272	96700	2.60561	96700	2.29725	96700	3.63514	96700	2.62682	96700	2.35854	96700	2.8164	96700	5.44992	96700	5.16657	96700	5.56614	96700	4.38918	96700	11.0314	96700	2.74103	96700	3.58304	96700	2.13746	96700	2.25831
96800	2.55002	96800	2.6039	96800	2.2926	96800	3.52515	96800	2.50265	96800	2.39022	96800	2.77367	96800	5.64731	96800	5.14433	96800	5.56919	96800	4.4279	96800	10.9923	96800	2.81437	96800	3.64212	96800	2.09421	96800	2.20031
96900	2.5467	96900	2.58353	96900	2.33903	96900	3.52711	96900	2.63986	96900	2.42072	96900	2.80461	96900	5.58009	96900	5.07757	96900	5.62475	96900	4.28072	96900	10.9772	96900	2.75072	96900	3.61358	96900	2.1862	96900	2.15572
97000	2.65015	97000	2.58547	97000	2.31591	97000	3.52183	97000	2.73702	97000	2.45322	97000	2.84593	97000	5.59123	97000	4.9684	97000	5.65451	97000	4.19853	97000	10.9062	97000	2.80491	97000	3.61878	97000	2.18868	97000	2.20686
97100	2.67052	97100	2.53073	97100	2.33676	97100	3.53995	97100	2.72961	97100	2.44084	97100	2.79187	97100	5.73129	97100	4.89029	97100	5.64838	97100	4.29651	97100	10.868	97100	2.82069	97100	3.60465	97100	2.14635	97100	2.19651
97200	2.60724	97200	2.60294	97200	2.35547	97200	3.52179	97200	2.78828	97200	2.48812	97200	2.72447	97200	5.75194	97200	4.90814	97200	5.59064	97200	4.25026	97200	11.013	97200	2.68479	97200	3.59268	97200	2.1307	97200	2.22962
97300	2.6158	97300	2.57975	97300	2.31531	97300	3.59856	97300	2.88275	97300	2.39689	97300	2.75984	97300	5.80007	97300	4.85796	97300	5.57303	97300	4.18593	97300	11.2884	97300	2.68528	97300	3.6097	97300	2.05346	97300	2.15081
97400	2.59782	97400	2.62046	97400	2.35531	97400	3.56694	97400	2.75068	97400	2.39974	97400	2.78391	97400	5.71958	97400	4.98917	97400	5.61178	97400	4.26359	97400	11.3585	97400	2.59895	97400	3.53583	97400	2.04968	97400	2.20844
97500	2.526	97500	2.68004	97500	2.33266	97500	3.52493	97500	2.75629	97500	2.43845	97500	2.74232	97500	5.66757	97500	5.05518	97500	5.54054	97500	4.26931	97500	11.2021	97500	2.57408	97500	3.65117	97500	2.05455	97500	2.18282
97600	2.60066	97600	2.56672	97600	2.24346	97600	3.55917	97600	2.67525	97600	2.45864	97600	2.78168	97600	5.7403	97600	5.29354	97600	5.56046	97600	4.22744	97600	11.2648	97600	2.67474	97600	3.68031	97600	1.99282	97600	2.30507
97700	2.63824	97700	2.58614	97700	2.27887	97700	3.57351	97700	2.72992	97700	2.45858	97700	2.83918	97700	5.738	97700	5.42174	97700	5.57679	97700	4.16683	97700	11.2024	97700	2.75766	97700	3.71521	97700	2.05489	97700	2.34843
97800	2.61008	97800	2.51095	97800	2.2269	97800	3.54927	97800	2.77742	97800	2.42099	97800	2.82042	97800	5.54491	97800	5.36074	97800	5.63916	97800	4.17866	97800	11.2195	97800	2.73627	97800	3.61777	97800	2.12834	97800	2.41166
97900	2.65704	97900	2.52949	97900	2.19229	97900	3.45435	97900	2.77885	97900	2.41829	97900	2.83578	97900	5.48373	97900	5.24769	97900	5.48419	97900	4.1864	97900	11.2167	97900	2.80205	97900	3.63074	97900	2.07488	97900	2.3981
98000	2.58216	98000	2.50496	98000	2.24274	98000	3.48563	98000	2.7148	98000	2.42812	98000	2.78089	98000	5.37997	98000	5.46491	98000	5.54306	98000	4.21459	98000	11.1452	98000	2.86331	98000	3.6513	98000	2.11469	98000	2.32318
98100	2.66392	98100	2.55584	98100	2.30223	98100	3.48716	98100	2.72868	98100	2.44258	98100	2.80952	98100	5.43107	98100	5.48345	98100	5.48943	98100	4.25199	98100	11.1127	98100	2.79131	98100	3.56333	98100	2.05579	98100	2.34656
98200	2.79516	98200	2.58222	98200	2.27858	98200	3.50235	98200	2.76965	98200	2.39607	98200	2.79218	98200	5.39421	98200	5.54622	98200	5.50733	98200	4.26914	98200	11.1398	98200	2.7221	98200	3.66374	98200	2.12121	98200	2.3156
98300	2.77553	98300	2.64436	98300	2.30812	98300	3.5154	98300	2.72671	98300	2.35684	98300	2.79789	98300	5.38904	98300	5.47404	98300	5.40146	98300	4.28026	98300	11.15	98300	2.78313	98300	3.55183	98300	2.07576	98300	2.27416
98400	2.79938	98400	2.55861	98400	2.31396	98400	3.48711	98400	2.73668	98400	2.45979	98400	2.84019	98400	5.4416	98400	5.4619	98400	5.45729	98400	4.27169	98400	11.1916	98400	2.76704	98400	3.57597	98400	2.09174	98400	2.30113
98500	2.80729	98500	2.4885	98500	2.27984	98500	3.46666	98500	2.72504	98500	2.47878	98500	2.88948	98500	5.55012	98500	5.46971	98500	5.56172	98500	4.18217	98500	11.222	98500	2.66048	98500	3.70028	98500	2.07936	98500	2.355
98600	2.80152	98600	2.49185	98600	2.26488	98600	3.49276	98600	2.76258	98600	2.37449	98600	2.9488	98600	5.64171	98600	5.2091	98600	5.58831	98600	4.21503	98600	11.2663	98600	2.55664	98600	3.58217	98600	2.08619	98600	2.24142
98700	2.84603	98700	2.54942	98700	2.24007	98700	3.55541	98700	2.71056	98700	2.33816	98700	2.86972	98700	5.55464	98700	5.24051	98700	5.57133	98700	4.21339	98700	11.4273	98700	2.678	98700	3.60849	98700	1.96037	98700	2.18796
98800	2.82131	98800	2.53774	98800	2.32233	98800	3.5174	98800	2.65088	98800	2.47735	98800	2.86015	98800	5.58083	98800	5.32315	98800	5.6597	98800	4.18314	98800	11.4541	98800	2.62285	98800	3.58347	98800	1.98443	98800	2.25723
98900	2.79042	98900	2.59399	98900	2.37314	98900	3.45814	98900	2.72959	98900	2.41702	98900	2.91552	98900	5.5383	98900	5.41064	98900	5.57959	98900	4.15896	98900	11.3508	98900	2.64701	98900	3.67408	98900	1.9571	98900	2.16934
99000	2.79403	99000	2.44844	99000	2.37688	99000	3.34039	99000	2.70333	99000	2.38968	99000	2.99174	99000	5.54466	99000	5.42371	99000	5.64832	99000	4.15463	99000	11.3546	99000	2.74998	99000	3.65936	99000	1.97553	99000	2.09151
99100	2.77618	99100	2.59636	99100	2.36956	99100	3.37871	99100	2.68251	99100	2.36708	99100	2.94898	99100	5.6208	99100	5.55671	99100	5.59114	99100	4.18413	99100	11.4289	99100	2.63259	99100	3.81241	99100	2.01215	99100	2.16961
99200	2.81802	99200	2.61129	99200	2.3502	99200	3.4332	99200	2.71459	99200	2.39334	99200	3.06634	99200	5.62454	99200	5.65289	99200	5.58696	99200	4.18171	99200	11.4146	99200	2.71833	99200	3.8051	99200	2.0094	99200	2.24092
99300	2.74493	99300	2.55659	99300	2.35191	99300	3.3471	99300	2.76319	99300	2.35426	99300	3.16224	99300	5.57282	99300	5.56468	99300	5.62166	99300	4.24425	99300	11.2652	99300	2.66096	99300	3.91421	99300	2.05909	99300	2.38863
99400	2.79667	99400	2.54293	99400	2.38335	99400	3.39657	99400	2.77435	99400	2.33431	99400	3.03869	99400	5.70077	99400	5.59569	99400	5.68519	99400	4.28451	99400	11.4718	99400	2.6309	99400	3.82287	99400	2.09217	99400	2.37596
99500	2.86143	99500	2.51101	99500	2.39204	99500	3.31484	99500	2.82205	99500	2.45537	99500	3.05597	99500	5.67356	99500	5.70524	99500	5.68309	99500	4.35137	99500	11.2514	99500	2.64797	99500	3.78889	99500	2.0648	99500	2.41032
99600	2.82047	99600	2.5939	99600	2.39765	99600	3.3213	99600	2.79481	99600	2.41599	99600	3.10499	99600	5.68505	99600	5.88008	99600	5.78769	99600	4.29377	99600	11.2601	99600	2.75455	99600	3.85786	99600	2.10589	99600	2.40458
99700	2.83899	99700	2.65119	99700	2.40342	99700	3.24759	99700	2.80687	99700	2.45836	99700	3.00902	99700	5.55162	99700	5.76809	99700	5.76043	99700	4.30526	99700	11.2745	99700	2.79231	99700	3.82695	99700	2.04289	99700	2.45793
99800	2.87058	99800	2.63584	99800	2.37715	99800	3.266	99800	2.85583	99800	2.43673	99800	3.01754	99800	5.53116	99800	5.79389	99800	5.8053	99800	4.40372	99800	11.1531	99800	2.69174	99800	3.70588	99800	2.09375	99800	2.26874
99900	2.81602	99900	2.48294	99900	2.3406	99900	3.31946	99900	2.81933	99900	2.49473	99900	3.06769	99900	5.58301	99900	5.86001	99900	5.91788	99900	4.38915	99900	11.1547	99900	2.64289	99900	3.74579	99900	2.09962	99900	2.25575
100000	2.69837	100000	2.47984	100000	2.33265	100000	3.22471	100000	2.80296	100000	2.49188	100000	2.93338	100000	5.51845	100000	5.96778	100000	5.91629	100000	4.28313	100000	11.1933	100000	2.52918	100000	3.70899	100000	2.03301	100000	2.21529
100100	2.74481	100100	2.54331	100100	2.29084	100100	3.10827	100100	2.85747	100100	2.42655	100100	2.9287	100100	5.60551	100100	5.75037	100100	5.99876	100100	4.28505	100100	11.1184	100100	2.49914	100100	3.76865	100100	2.08725	100100	2.24799
100200	2.71543	100200	2.69024	100200	2.30855	100200	3.1748	100200	2.86879	100200	2.45953	100200	3.02657	100200	5.54889	100200	5.76878	100200	6.00439	100200	4.2903	100200	11.1467	100200	2.55528	100200	3.62335	100200	2.049	100200	2.11361
100300	2.72625	100300	2.54904	100300	2.29769	100300	3.22986	100300	2.7629	100300	2.39499	100300	3.04404	100300	5.453	100300	5.88512	100300	6.0197	100300	4.41909	100300	11.1902	100300	2.62502	100300	3.66089	100300	2.02347	100300	2.15901
100400	2.7556	100400	2.50176	100400	2.30607	100400	3.14508	100400	2.72573	100400	2.43062	100400	3.02593	100400	5.42494	100400	5.93669	100400	6.1109	100400	4.35143	100400	11.0068	100400	2.59612	100400	3.65649	100400	1.95415	100400	2.12771
100500	2.75937	100500	2.53486	100500	2.23934	100500	3.07694	100500	2.84421	100500	2.42422	100500	3.03097	100500	5.37929	100500	5.92402	100500	6.19867	100500	4.33335	100500	11.055	100500	2.54694	100500	3.66653	100500	2.07312	100500	2.1669
100600	2.68655	100600	2.49658	100600	2.26464	100600	3.07264	100600	2.82221	100600	2.39385	100600	3.02617	100600	5.28917	100600	5.69729	100600	6.19217	100600	4.4777	100600	11.0797	100600	2.68928	100600	3.68014	100600	2.1064	100600	2.10263
100700	2.71527	100700	2.55538	100700	2.23194	100700	3.07134	100700	2.77986	100700	2.38274	100700	3.01261	100700	5.33595	100700	5.6979	100700	6.23832	100700	4.59183	100700	11.048	100700	2.69148	100700	3.76839	100700	2.1604	100700	2.14916
100800	2.71731	100800	2.55373	100800	2.17848	100800	3.07326	100800	2.6667	100800	2.37052	100800	2.83535	100800	5.40118	100800	5.76021	100800	6.12993	100800	4.50148	100800	10.9902	100800	2.70376	100800	3.7019	100800	2.10463	100800	2.12281
100900	2.64603	100900	2.63785	100900	2.19785	100900	3.10333	100900	2.64402	100900	2.41122	100900	2.80048	100900	5.46757	100900	5.93275	100900	6.17866	100900	4.55435	100900	10.973	100900	2.67987	100900	3.63961	100900	2.15369	100900	2.20775
101000	2.6728	101000	2.53341	101000	2.17822	101000	3.2528	101000	2.71085	101000	2.33599	101000	2.82306	101000	5.57907	101000	6.05679	101000	6.15349	101000	4.4653	101000	10.9579	101000	2.57093	101000	3.62735	101000	2.20256	101000	2.13736
101100	2.64622	101100	2.52508	101100	2.19744	101100	3.09047	101100	2.69478	101100	2.35876	101100	2.75981	101100	5.5824	101100	5.88573	101100	5.91547	101100	4.49416	101100	10.8212	101100	2.62892	101100	3.52022	101100	2.17069	101100	2.2631
101200	2.73098	101200	2.62369	101200	2.14668	101200	3.09784	101200	2.66029	101200	2.32988	101200	2.76434	101200	5.44516	101200	5.79856	101200	5.96167	101200	4.36245	101200	11.0278	101200	2.62436	101200	3.48961	101200	2.10393	101200	2.19679
101300	2.67451	101300	2.63775	101300	2.19176	101300	3.09708	101300	2.68367	101300	2.34938	101300	2.7838	101300	5.47358	101300	5.89761	101300	5.89452	101300	4.32042	101300	11.0515	101300	2.64859	101300	3.44716	101300	2.13984	101300	2.22096
101400	2.60084	101400	2.60305	101400	2.20558	101400	3.08046	101400	2.64972	101400	2.34787	101400	2.78962	101400	5.52627	101400	5.82066	101400	6.15727	101400	4.40795	101400	10.8434	101400	2.59871	101400	3.37846	101400	2.09463	101400	2.26293
101500	2.64259	101500	2.52904	101500	2.21635	101500	3.1137	101500	2.70092	101500	2.29644	101500	2.74614	101500	5.58791	101500	6.0023	101500	6.09612	101500	4.31205	101500	10.8897	101500	2.59946	101500	3.3985	101500	2.14841	101500	2.27655
101600	2.72232	101600	2.52634	101600	2.216	101600	3.06581	101600	2.75454	101600	2.30964	101600	2.83218	101600	5.47969	101600	5.97664	101600	6.18182	101600	4.27922	101600	10.918	101600	2.6525	101600	3.4789	101600	2.20162	101600	2.28092
101700	2.70666	101700	2.59487	101700	2.26345	101700	3.13101	101700	2.78367	101700	2.32066	101700	2.75112	101700	5.63002	101700	5.89069	101700	6.19417	101700	4.26057	101700	10.8911	101700	2.67182	101700	3.45972	101700	2.15079	101700	2.24602
101800	2.70979	101800	2.67607	101800	2.26653	101800	3.10498	101800	2.68693	101800	2.3214	101800	2.73197	101800	5.6246	101800	5.61391	101800	6.0773	101800	4.23507	101800	10.8587	101800	2.62828	101800	3.50498	101800	2.20938	101800	2.16276
101900	2.59159	101900	2.64975	101900	2.27393	101900	3.03924	101900	2.72278	101900	2.31778	101900	2.68993	101900	5.86115	101900	5.7005	101900	6.1895	101900	4.31681	101900	10.8276	101900	2.58293	101900	3.46806	101900	2.17209	101900	2.17276
102000	2.61798	102000	2.62232	102000	2.3202	102000	3.06969	102000	2.78516	102000	2.24879	102000	2.66711	102000	5.86146	102000	5.51469	102000	6.15226	102000	4.33999	102000	10.7259	102000	2.62034	102000	3.42122	102000	2.18979	102000	2.17619
102100	2.65944	102100	2.62403	102100	2.28177	102100	3.08453	102100	2.92204	102100	2.29562	102100	2.6639	102100	5.84493	102100	5.58908	102100	6.16824	102100	4.39302	102100	10.6725	102100	2.59213	102100	3.54581	102100	2.22334	102100	2.12564
102200	2.70525	102200	2.5878	102200	2.27725	102200	3.08397	102200	2.84475	102200	2.32061	102200	2.87125	102200	5.79868	102200	5.46539	102200	6.05844	102200	4.39109	102200	10.5691	102200	2.62812	102200	3.66396	102200	2.08103	102200	2.13182
102300	2.71381	102300	2.57878	102300	2.24165	102300	3.15162	102300	2.84158	102300	2.24081	102300	2.8183	102300	5.84839	102300	5.37564	102300	6.031	102300	4.43652	102300	10.392	102300	2.58099	102300	3.70478	102300	2.02291	102300	2.25397
102400	2.69787	102400	2.51278	102400	2.21107	102400	3.12831	102400	2.91897	102400	2.31065	102400	2.90854	102400	5.94873	102400	5.50405	102400	6.07487	102400	4.43715	102400	10.209	102400	2.61318	102400	3.773	102400	2.0749	102400	2.28161
102500	2.7412	102500	2.55858	102500	2.22991	102500	3.18017	102500	2.80664	102500	2.31583	102500	2.85512	102500	6.0529	102500	5.60855	102500	5.9367	102500	4.36248	102500	10.1055	102500	2.59699	102500	3.84142	102500	2.02021	102500	2.24401
102600	2.79344	102600	2.46707	102600	2.22061	102600	3.20043	102600	2.64938	102600	2.3067	102600	2.81882	102600	6.07477	102600	5.65809	102600	5.95456	102600	4.26799	102600	9.92105	102600	2.63988	102600	3.83525	102600	2.06846	102600	2.25227
102700	2.73254	102700	2.51025	102700	2.21642	102700	3.1778	102700	2.68047	102700	2.35804	102700	2.7247	102700	5.94033	102700	5.71752	102700	5.98696	102700	4.33583	102700	9.8002	102700	2.58749	102700	3.98147	102700	2.12973	102700	2.25444
102800	2.77977	102800	2.54781	102800	2.24605	102800	3.1003	102800	2.72058	102800	2.40156	102800	2.80757	102800	6.03307	102800	5.78693	102800	5.94879	102800	4.30277	102800	9.74413	102800	2.60203	102800	3.89123	102800	2.15986	102800	2.27006
102900	2.7877	102900	2.51039	102900	2.23285	102900	3.04509	102900	2.58428	102900	2.38627	102900	2.75158	102900	5.94318	102900	5.61046	102900	5.95633	102900	4.33897	102900	9.65169	102900	2.72534	102900	3.76855	102900	2.13675	102900	2.16533
103000	2.78645	103000	2.62722	103000	2.24731	103000	3.06568	103000	2.72784	103000	2.34254	103000	2.69603	103000	6.027	103000	5.55848	103000	5.90692	103000	4.41131	103000	9.72701	103000	2.71367	103000	3.82146	103000	2.11993	103000	2.28493
103100	2.73461	103100	2.56508	103100	2.25109	103100	3.11035	103100	2.64278	103100	2.39233	103100	2.63081	103100	6.19482	103100	5.60362	103100	5.80367	103100	4.3548	103100	9.84603	103100	2.6835	103100	3.76912	103100	2.15869	103100	2.31452
103200	2.79247	103200	2.58101	103200	2.23533	103200	3.11644	103200	2.64943	103200	2.38331	103200	2.61891	103200	6.28759	103200	5.74583	103200	5.77398	103200	4.43286	103200	9.75536	103200	2.70728	103200	3.77672	103200	2.11733	103200	2.28713
103300	2.73237	103300	2.5692	103300	2.29285	103300	3.11186	103300	2.68944	103300	2.31922	103300	2.6119	103300	6.34704	103300	5.8399	103300	5.76883	103300	4.4663	103300	9.67605	103300	2.69972	103300	3.82899	103300	2.12779	103300	2.34547
103400	2.71418	103400	2.56344	103400	2.22105	103400	3.08524	103400	2.62419	103400	2.23884	103400	2.64929	103400	6.2323	103400	5.81929	103400	5.76845	103400	4.44018	103400	9.67823	103400	2.6632	103400	3.81123	103400	2.04949	103400	2.35635
103500	2.64134	103500	2.60462	103500	2.2073	103500	3.07165	103500	2.53987	103500	2.23684	103500	2.68766	103500	6.3546	103500	5.88577	103500	5.82375	103500	4.38046	103500	9.99496	103500	2.62873	103500	3.7483	103500	2.01887	103500	2.40284
103600	2.65946	103600	2.59066	103600	2.24472	103600	3.14266	103600	2.58814	103600	2.27069	103600	2.7218	103600	6.17432	103600	5.69362	103600	5.8547	103600	4.37279	103600	9.79357	103600	2.75171	103600	3.67537	103600	1.9789	103600	2.45281
103700	2.70362	103700	2.61597	103700	2.23153	103700	3.24096	103700	2.61562	103700	2.28989	103700	2.70261	103700	6.28971	103700	5.73436	103700	5.76172	103700	4.40275	103700	9.89776	103700	2.84936	103700	3.725	103700	2.05163	103700	2.52595
103800	2.74933	103800	2.62228	103800	2.27874	103800	3.17397	103800	2.48332	103800	2.34923	103800	2.63255	103800	6.18752	103800	5.78275	103800	5.92912	103800	4.30089	103800	10.0495	103800	2.80725	103800	3.65055	103800	2.02391	103800	2.47192
103900	2.7691	103900	2.58279	103900	2.32083	103900	3.11694	103900	2.56705	103900	2.33817	103900	2.73681	103900	6.23871	103900	5.73293	103900	5.93003	103900	4.29935	103900	10.0626	103900	2.90929	103900	3.6019	103900	1.95459	103900	2.55841
104000	2.66918	104000	2.61302	104000	2.32041	104000	3.05391	104000	2.50157	104000	2.43217	104000	2.7738	104000	6.26071	104000	5.65526	104000	5.93022	104000	4.33833	104000	10.16	104000	2.77623	104000	3.55409	104000	2.05806	104000	2.50178
104100	2.82574	104100	2.54637	104100	2.2898	104100	3.13503	104100	2.59341	104100	2.35757	104100	2.77084	104100	6.34586	104100	5.60357	104100	5.9425	104100	4.34425	104100	10.3457	104100	2.7938	104100	3.50259	104100	1.99936	104100	2.47836
104200	2.80422	104200	2.57487	104200	2.28279	104200	3.24445	104200	2.66563	104200	2.35351	104200	2.68205	104200	6.2475	104200	5.67247	104200	6.02175	104200	4.31979	104200	10.2314	104200	2.69464	104200	3.52199	104200	2.07046	104200	2.47072
104300	2.76409	104300	2.59341	104300	2.28982	104300	3.1677	104300	2.79623	104300	2.38541	104300	2.59696	104300	6.04994	104300	5.67376	104300	6.00186	104300	4.4011	104300	10.1136	104300	2.64605	104300	3.45988	104300	2.0045	104300	2.45005
104400	2.76075	104400	2.67487	104400	2.29053	104400	3.21726	104400	2.82191	104400	2.36198	104400	2.8389	104400	6.08142	104400	5.68327	104400	5.98912	104400	4.4265	104400	10.083	104400	2.70504	104400	3.46801	104400	2.01372	104400	2.49386
104500	2.7137	104500	2.60488	104500	2.37712	104500	3.2416	104500	2.85341	104500	2.27223	104500	2.72445	104500	6.04842	104500	5.5822	104500	6.01913	104500	4.33242	104500	10.057	104500	2.61505	104500	3.39878	104500	2.07063	104500	2.53642
104600	2.59934	104600	2.60057	104600	2.31878	104600	3.20059	104600	2.89556	104600	2.29193	104600	2.68563	104600	5.96689	104600	5.39056	104600	6.11131	104600	4.37111	104600	9.90831	104600	2.53909	104600	3.44148	104600	2.02232	104600	2.45444
104700	2.60593	104700	2.64624	104700	2.35523	104700	3.21721	104700	3.0416	104700	2.27574	104700	2.55961	104700	6.0689	104700	5.39772	104700	6.17458	104700	4.35387	104700	9.92928	104700	2.48356	104700	3.52571	104700	1.98516	104700	2.5287
104800	2.66435	104800	2.59451	104800	2.35484	104800	3.19726	104800	3.07862	104800	2.1953	104800	2.54774	104800	6.07448	104800	5.59978	104800	6.2465	104800	4.28283	104800	10.0643	104800	2.47056	104800	3.42796	104800	2.00723	104800	2.54036
104900	2.70654	104900	2.62854	104900	2.34266	104900	3.2068	104900	3.16078	104900	2.20202	104900	2.58342	104900	6.10087	104900	5.54084	104900	6.28419	104900	4.34087	104900	10.0473	104900	2.45006	104900	3.53641	104900	1.9536	104900	2.62597
105000	2.68378	105000	2.61767	105000	2.3318	105000	3.1754	105000	3.1993	105000	2.25224	105000	2.53185	105000	6.0237	105000	5.54874	105000	6.20528	105000	4.30813	105000	10.1232	105000	2.46244	105000	3.42768	105000	1.91378	105000	2.52478
105100	2.67018	105100	2.6068	105100	2.35349	105100	3.23811	105100	3.15904	105100	2.22865	105100	2.6193	105100	6.08402	105100	5.4403	105100	6.31237	105100	4.3794	105100	10.0096	105100	2.35245	105100	3.47244	105100	1.93492	105100	2.41711
105200	2.66761	105200	2.56445	105200	2.29935	105200	3.16991	105200	3.18594	105200	2.23068	105200	2.62279	105200	6.18228	105200	5.60774	105200	6.21018	105200	4.35129	105200	9.91715	105200	2.28637	105200	3.53668	105200	1.92402	105200	2.45594
105300	2.68271	105300	2.59801	105300	2.30664	105300	3.1452	105300	3.2604	105300	2.26939	105300	2.53019	105300	6.30098	105300	5.66162	105300	6.24476	105300	4.36625	105300	9.82126	105300	2.35043	105300	3.60746	105300	1.94557	105300	2.44876
105400	2.81359	105400	2.53087	105400	2.26148	105400	3.03801	105400	3.24484	105400	2.24033	105400	2.6546	105400	6.19764	105400	5.72022	105400	6.22446	105400	4.36658	105400	9.79127	105400	2.32628	105400	3.59234	105400	1.99578	105400	2.46911
105500	2.82777	105500	2.61028	105500	2.25517	105500	3.10673	105500	3.26897	105500	2.19234	105500	2.67107	105500	6.22631	105500	5.80997	105500	6.21201	105500	4.33819	105500	9.82586	105500	2.39291	105500	3.6235	105500	2.03578	105500	2.48252
105600	2.82798	105600	2.63401	105600	2.25215	105600	3.11156	105600	3.26679	105600	2.21009	105600	2.65653	105600	6.26016	105600	5.91816	105600	6.16607	105600	4.37685	105600	10.0189	105600	2.43663	105600	3.57513	105600	1.96536	105600	2.38246
105700	2.77915	105700	2.62904	105700	2.30405	105700	3.09939	105700	3.16766	105700	2.21447	105700	2.75837	105700	6.1818	105700	6.07369	105700	6.16152	105700	4.40563	105700	9.7792	105700	2.46144	105700	3.52248	105700	2.0078	105700	2.45017
105800	2.78745	105800	2.62377	105800	2.29646	105800	3.14357	105800	3.09706	105800	2.21643	105800	2.73777	105800	6.20562	105800	6.05055	105800	6.06308	105800	4.41467	105800	9.82689	105800	2.37405	105800	3.50792	105800	1.99127	105800	2.44732
105900	2.76597	105900	2.65649	105900	2.25922	105900	3.28354	105900	3.28317	105900	2.23073	105900	2.76089	105900	6.29248	105900	6.03321	105900	6.03623	105900	4.41773	105900	9.67052	105900	2.34765	105900	3.55933	105900	1.98221	105900	2.45147
106000	2.7285	106000	2.59851	106000	2.36357	106000	3.24007	106000	3.34129	106000	2.22857	106000	2.79139	106000	6.44364	106000	5.89572	106000	6.11343	106000	4.28973	106000	9.83335	106000	2.35407	106000	3.61582	106000	1.95435	106000	2.4143
106100	2.7829	106100	2.58423	106100	2.31071	106100	3.16908	106100	3.49355	106100	2.27536	106100	2.85765	106100	6.43116	106100	5.92225	106100	6.04725	106100	4.28872	106100	9.74496	106100	2.33036	106100	3.65558	106100	2.00515	106100	2.48719
106200	2.74605	106200	2.63105	106200	2.35584	106200	3.18339	106200	3.56076	106200	2.2736	106200	2.86049	106200	6.4135	106200	6.15362	106200	6.10967	106200	4.19312	106200	9.61806	106200	2.32424	106200	3.61108	106200	2.02762	106200	2.44177
106300	2.7798	106300	2.64084	106300	2.35416	106300	3.17499	106300	3.53748	106300	2.26166	106300	2.88858	106300	6.29525	106300	6.14459	106300	6.03931	106300	4.10407	106300	9.69589	106300	2.29666	106300	3.6778	106300	2.0027	106300	2.38618
106400	2.74318	106400	2.61471	106400	2.29055	106400	3.19455	106400	3.53888	106400	2.19318	106400	2.97856	106400	6.31149	106400	6.13288	106400	6.06395	106400	4.07899	106400	9.66579	106400	2.29906	106400	3.68214	106400	1.97992	106400	2.35497
106500	2.75766	106500	2.61279	106500	2.25638	106500	3.17087	106500	3.42584	106500	2.18835	106500	2.96871	106500	6.4285	106500	6.10291	106500	6.09141	106500	4.11683	106500	9.91517	106500	2.43803	106500	3.69976	106500	2.03008	106500	2.40377
106600	2.65438	106600	2.60614	106600	2.28011	106600	3.20328	106600	3.35378	106600	2.21635	106600	3.05413	106600	6.45105	106600	6.01891	106600	6.06408	106600	4.14747	106600	10.0382	106600	2.47602	106600	3.5858	106600	2.04208	106600	2.33112
106700	2.70185	106700	2.65746	106700	2.25899	106700	3.16984	106700	3.39485	106700	2.19894	106700	3.1014	106700	6.41699	106700	6.11518	106700	6.16311	106700	4.17061	106700	9.95828	106700	2.33109	106700	3.57565	106700	1.94845	106700	2.34135
106800	2.74034	106800	2.74886	106800	2.25759	106800	3.18319	106800	3.1928	106800	2.18852	106800	3.04126	106800	6.46172	106800	6.13724	106800	6.2012	106800	4.18091	106800	9.90411	106800	2.28842	106800	3.51961	106800	1.93876	106800	2.40814
106900	2.75468	106900	2.68532	106900	2.22124	106900	3.2002	106900	3.22008	106900	2.16564	106900	3.05837	106900	6.4221	106900	6.17443	106900	6.21425	106900	4.27795	106900	9.95457	106900	2.33749	106900	3.56519	106900	1.89796	106900	2.38792
107000	2.85359	107000	2.6804	107000	2.28632	107000	3.21316	107000	3.35134	107000	2.19266	107000	2.9436	107000	6.43672	107000	5.9634	107000	6.14355	107000	4.33385	107000	9.86074	107000	2.39108	107000	3.59413	107000	1.89932	107000	2.40943
107100	2.79817	107100	2.74724	107100	2.29291	107100	3.18542	107100	3.26553	107100	2.16374	107100	2.88361	107100	6.36061	107100	6.01881	107100	6.21932	107100	4.25661	107100	9.78282	107100	2.35057	107100	3.64554	107100	1.91709	107100	2.44627
107200	2.84906	107200	2.67146	107200	2.23859	107200	3.18154	107200	3.38537	107200	2.12515	107200	2.89326	107200	6.261	107200	6.0992	107200	6.26483	107200	4.12806	107200	9.45409	107200	2.46952	107200	3.55632	107200	1.90089	107200	2.41307
107300	2.71442	107300	2.63815	107300	2.27154	107300	3.12607	107300	3.29053	107300	2.11422	107300	2.81605	107300	6.1512	107300	6.0381	107300	6.22079	107300	4.15756	107300	9.27643	107300	2.46078	107300	3.49776	107300	1.89523	107300	2.46965
107400	2.79791	107400	2.60661	107400	2.28379	107400	3.12598	107400	3.26845	107400	2.14267	107400	2.65823	107400	6.23199	107400	5.91172	107400	6.29867	107400	4.21197	107400	9.35572	107400	2.4404	107400	3.46527	107400	1.94004	107400	2.43637
107500	2.78272	107500	2.61612	107500	2.29199	107500	3.18292	107500	3.29446	107500	2.13538	107500	2.76422	107500	6.32229	107500	5.95694	107500	6.31335	107500	4.25033	107500	9.39271	107500	2.38476	107500	3.42392	107500	1.95173	107500	2.47642
107600	2.88497	107600	2.62196	107600	2.22322	107600	3.25011	107600	3.3973	107600	2.2115	107600	2.76007	107600	6.33795	107600	6.01247	107600	6.3148	107600	4.27699	107600	9.59708	107600	2.33383	107600	3.36035	107600	1.99388	107600	2.53505
107700	2.78481	107700	2.65686	107700	2.20178	107700	3.16571	107700	3.39517	107700	2.22248	107700	2.70635	107700	6.43659	107700	5.99842	107700	6.38062	107700	4.2995	107700	9.61946	107700	2.34906	107700	3.43336	107700	1.88613	107700	2.60313
107800	2.75794	107800	2.76148	107800	2.17286	107800	3.13052	107800	3.54304	107800	2.2486	107800	2.7395	107800	6.46025	107800	6.09643	107800	6.47054	107800	4.36914	107800	9.43447	107800	2.31934	107800	3.43114	107800	1.91655	107800	2.48414
107900	2.73464	107900	2.63674	107900	2.23234	107900	3.146	107900	3.43613	107900	2.23524	107900	2.73949	107900	6.64033	107900	5.92243	107900	6.42129	107900	4.29554	107900	9.54452	107900	2.28174	107900	3.39652	107900	1.88127	107900	2.57893
108000	2.7933	108000	2.64479	108000	2.24981	108000	3.17854	108000	3.37126	108000	2.20862	108000	2.738	108000	6.45905	108000	5.96557	108000	6.52451	108000	4.31556	108000	9.4707	108000	2.2319	108000	3.4456	108000	1.86338	108000	2.46633
108100	2.85637	108100	2.76612	108100	2.22072	108100	3.13639	108100	3.48283	108100	2.19571	108100	2.79841	108100	6.48951	108100	5.99494	108100	6.27571	108100	4.32261	108100	9.5163	108100	2.24776	108100	3.45261	108100	1.88843	108100	2.47841
108200	2.77909	108200	2.70666	108200	2.19605	108200	3.17081	108200	3.45293	108200	2.18783	108200	2.78612	108200	6.49767	108200	5.95646	108200	6.22758	108200	4.38359	108200	9.58989	108200	2.22759	108200	3.44101	108200	1.88489	108200	2.47598
108300	2.78613	108300	2.74698	108300	2.24995	108300	3.10699	108300	3.4097	108300	2.18654	108300	2.69646	108300	6.5391	108300	5.74765	108300	6.13876	108300	4.40926	108300	9.76345	108300	2.36926	108300	3.48894	108300	1.83255	108300	2.54069
108400	2.77102	108400	2.76868	108400	2.29056	108400	3.16147	108400	3.61375	108400	2.20472	108400	2.84414	108400	6.43473	108400	5.72101	108400	6.12856	108400	4.41981	108400	9.80116	108400	2.30724	108400	3.43809	108400	1.90082	108400	2.57946
108500	2.77557	108500	2.69203	108500	2.28612	108500	3.21719	108500	3.63037	108500	2.20816	108500	2.79244	108500	6.28051	108500	5.69298	108500	6.05482	108500	4.42992	108500	9.79272	108500	2.24585	108500	3.46148	108500	1.88759	108500	2.63518
108600	2.81436	108600	2.64543	108600	2.27299	108600	3.12573	108600	3.68825	108600	2.20296	108600	2.71597	108600	5.97416	108600	5.73494	108600	6.07412	108600	4.41121	108600	9.64226	108600	2.2135	108600	3.54013	108600	1.9547	108600	2.6893
108700	2.78569	108700	2.68097	108700	2.29947	108700	3.17953	108700	3.742	108700	2.21077	108700	2.89052	108700	5.859	108700	5.63002	108700	6.07556	108700	4.36367	108700	9.40794	108700	2.18859	108700	3.59595	108700	2.00438	108700	2.6067
108800	2.76827	108800	2.61803	108800	2.22327	108800	3.10302	108800	3.64891	108800	2.2121	108800	2.84619	108800	5.93146	108800	5.56425	108800	6.06727	108800	4.4425	108800	9.21258	108800	2.24687	108800	3.55006	108800	2.01755	108800	2.41989
108900	2.7066	108900	2.73155	108900	2.20156	108900	3.04313	108900	3.86363	108900	2.17906	108900	2.96757	108900	5.86511	108900	5.62388	108900	5.99254	108900	4.48745	108900	9.29406	108900	2.31312	108900	3.42824	108900	1.92427	108900	2.43672
109000	2.69117	109000	2.61667	109000	2.25376	109000	3.13644	109000	3.8874	109000	2.15658	109000	2.9306	109000	6.09998	109000	5.61335	109000	6.12026	109000	4.40582	109000	9.18199	109000	2.35475	109000	3.49657	109000	1.91838	109000	2.52233
109100	2.73973	109100	2.62989	109100	2.27301	109100	3.05668	109100	3.88677	109100	2.13469	109100	2.88481	109100	6.0472	109100	5.5334	109100	6.10938	109100	4.36386	109100	9.19183	109100	2.45938	109100	3.40366	109100	1.96027	109100	2.60556
109200	2.71531	109200	2.65046	109200	2.32595	109200	3.05603	109200	3.90299	109200	2.13416	109200	2.93869	109200	6.22755	109200	5.4448	109200	6.00502	109200	4.36071	109200	9.2716	109200	2.52417	109200	3.48094	109200	1.95497	109200	2.59375
109300	2.7768	109300	2.59454	109300	2.31343	109300	3.1037	109300	4.18668	109300	2.2056	109300	2.97156	109300	6.27424	109300	5.44428	109300	5.96871	109300	4.40884	109300	9.20064	109300	2.6042	109300	3.47001	109300	2.00661	109300	2.51607
109400	2.81055	109400	2.64978	109400	2.31282	109400	3.02268	109400	4.2615	109400	2.27905	109400	2.98505	109400	6.25053	109400	5.4122	109400	5.83677	109400	4.35972	109400	9.09946	109400	2.54173	109400	3.47752	109400	2.00393	109400	2.55951
109500	2.78732	109500	2.54585	109500	2.24804	109500	3.03523	109500	4.38982	109500	2.20998	109500	2.89965	109500	6.43759	109500	5.50142	109500	5.94192	109500	4.39467	109500	9.07253	109500	2.57181	109500	3.49306	109500	1.96422	109500	2.44643
109600	2.75907	109600	2.6267	109600	2.241	109600	3.08663	109600	4.06304	109600	2.20044	109600	2.98079	109600	6.36837	109600	5.50177	109600	5.93335	109600	4.39327	109600	9.02614	109600	2.58192	109600	3.42025	109600	1.93643	109600	2.46084
109700	2.66803	109700	2.54766	109700	2.33601	109700	3.14433	109700	4.04694	109700	2.23893	109700	3.08067	109700	6.37766	109700	5.59165	109700	6.00716	109700	4.41554	109700	8.96875	109700	2.50542	109700	3.43235	109700	1.91441	109700	2.59386
109800	2.68344	109800	2.51512	109800	2.32898	109800	3.11777	109800	3.99343	109800	2.2195	109800	3.12313	109800	6.37793	109800	5.4732	109800	6.07678	109800	4.38594	109800	8.90605	109800	2.46403	109800	3.36322	109800	1.94984	109800	2.56937
109900	2.67882	109900	2.47289	109900	2.37926	109900	3.13298	109900	4.15686	109900	2.23619	109900	3.01992	109900	6.30121	109900	5.59415	109900	5.91037	109900	4.31376	109900	8.96597	109900	2.46611	109900	3.46178	109900	2.01208	109900	2.53445
110000	2.71545	110000	2.53772	110000	2.33145	110000	3.16861	110000	4.10132	110000	2.29331	110000	2.99355	110000	6.09834	110000	5.59449	110000	5.9134	110000	4.30155	110000	8.99469	110000	2.36718	110000	3.46375	110000	2.01173	110000	2.52707
110100	2.64661	110100	2.56684	110100	2.30733	110100	3.08082	110100	4.3763	110100	2.3169	110100	2.95375	110100	6.38974	110100	5.66857	110100	5.86611	110100	4.21818	110100	9.15067	110100	2.36081	110100	3.48541	110100	1.95663	110100	2.45685
110200	2.70003	110200	2.58627	110200	2.321	110200	3.1254	110200	4.31326	110200	2.32356	110200	3.04762	110200	6.46012	110200	5.70972	110200	5.91145	110200	4.28353	110200	9.19977	110200	2.26034	110200	3.49719	110200	1.96279	110200	2.50125
110300	2.70751	110300	2.63419	110300	2.33618	110300	3.11713	110300	4.31875	110300	2.24512	110300	3.14948	110300	6.38826	110300	5.82949	110300	5.93075	110300	4.32531	110300	9.06588	110300	2.23997	110300	3.54	110300	1.98077	110300	2.48223
110400	2.6642	110400	2.64814	110400	2.28815	110400	3.08835	110400	4.38386	110400	2.16241	110400	3.01068	110400	6.29823	110400	5.80816	110400	5.94723	110400	4.32507	110400	8.8994	110400	2.29312	110400	3.62068	110400	1.96159	110400	2.47365
110500	2.6622	110500	2.60836	110500	2.27982	110500	3.17643	110500	4.30794	110500	2.1736	110500	3.13143	110500	6.35585	110500	5.73774	110500	6.00508	110500	4.37779	110500	8.96352	110500	2.29041	110500	3.68749	110500	2.00915	110500	2.36131
110600	2.61799	110600	2.5739	110600	2.30969	110600	3.20162	110600	3.95939	110600	2.1893	110600	3.15668	110600	6.42202	110600	5.70189	110600	5.93573	110600	4.28404	110600	8.82805	110600	2.38908	110600	3.63725	110600	1.98072	110600	2.44538
110700	2.65444	110700	2.56646	110700	2.37745	110700	3.21456	110700	3.98533	110700	2.14944	110700	3.19644	110700	6.35959	110700	5.77148	110700	5.94305	110700	4.349	110700	8.83449	110700	2.27855	110700	3.68971	110700	1.92123	110700	2.56165
110800	2.66073	110800	2.63199	110800	2.32674	110800	3.1212	110800	3.91566	110800	2.2024	110800	3.12685	110800	6.49725	110800	5.75767	110800	5.99785	110800	4.31064	110800	9.01721	110800	2.27365	110800	3.48651	110800	2.03377	110800	2.44528
110900	2.65737	110900	2.62262	110900	2.22289	110900	3.17506	110900	3.89051	110900	2.19747	110900	3.18111	110900	6.54706	110900	5.85142	110900	5.93431	110900	4.25785	110900	8.912	110900	2.31309	110900	3.4802	110900	2.08297	110900	2.48659
111000	2.75584	111000	2.59658	111000	2.24688	111000	3.17721	111000	3.98043	111000	2.16534	111000	3.21503	111000	6.42013	111000	5.81874	111000	5.87144	111000	4.28808	111000	9.21384	111000	2.23157	111000	3.60439	111000	2.11649	111000	2.52229
111100	2.74896	111100	2.56845	111100	2.22695	111100	3.13089	111100	4.00007	111100	2.11891	111100	3.09447	111100	6.27647	111100	5.92933	111100	5.8656	111100	4.26767	111100	9.22713	111100	2.33964	111100	3.52104	111100	2.06823	111100	2.48434
111200	2.71256	111200	2.5695	111200	2.25102	111200	3.21197	111200	3.88829	111200	2.15224	111200	3.20977	111200	6.23421	111200	5.87102	111200	5.7419	111200	4.25062	111200	9.16497	111200	2.32058	111200	3.43047	111200	2.15148	111200	2.5091
111300	2.71798	111300	2.51959	111300	2.16811	111300	3.19006	111300	3.85455	111300	2.10663	111300	3.17816	111300	6.38516	111300	5.73125	111300	5.77605	111300	4.21693	111300	9.13902	111300	2.31112	111300	3.37107	111300	2.09479	111300	2.59642
111400	2.72314	111400	2.59272	111400	2.22665	111400	3.13072	111400	3.8052	111400	2.16867	111400	3.20795	111400	6.42854	111400	5.73145	111400	5.81741	111400	4.21978	111400	9.13997	111400	2.13647	111400	3.43158	111400	2.09004	111400	2.72701
111500	2.68956	111500	2.55524	111500	2.2244	111500	3.06601	111500	3.95755	111500	2.15938	111500	3.30658	111500	6.33725	111500	5.78694	111500	5.75561	111500	4.28422	111500	9.20318	111500	2.2266	111500	3.41638	111500	2.08552	111500	2.7239
111600	2.66852	111600	2.46226	111600	2.22126	111600	3.01097	111600	4.06105	111600	2.18093	111600	3.18896	111600	6.39586	111600	5.7921	111600	5.7561	111600	4.30493	111600	9.37426	111600	2.17527	111600	3.47676	111600	2.15026	111600	2.60508
111700	2.62917	111700	2.50714	111700	2.26654	111700	3.128	111700	4.22852	111700	2.19059	111700	3.17658	111700	6.67398	111700	5.78679	111700	5.91115	111700	4.31542	111700	9.3417	111700	2.14673	111700	3.41378	111700	2.08593	111700	2.57493
111800	2.62891	111800	2.53474	111800	2.25919	111800	3.12332	111800	4.49522	111800	2.0959	111800	3.20504	111800	6.66021	111800	5.80834	111800	5.92026	111800	4.30703	111800	9.14001	111800	2.11724	111800	3.43555	111800	2.07689	111800	2.56857
111900	2.65942	111900	2.46979	111900	2.20026	111900	3.07302	111900	4.47088	111900	2.18532	111900	3.20892	111900	6.62711	111900	5.87763	111900	5.80894	111900	4.26909	111900	8.99033	111900	2.08251	111900	3.44088	111900	2.08224	111900	2.56312
112000	2.68385	112000	2.40313	112000	2.15938	112000	3.217	112000	4.50773	112000	2.18742	112000	3.16912	112000	6.50018	112000	5.86463	112000	5.86449	112000	4.28105	112000	9.04134	112000	2.17964	112000	3.37683	112000	2.11502	112000	2.5532
112100	2.65601	112100	2.46926	112100	2.19767	112100	3.10361	112100	4.59975	112100	2.21722	112100	3.08847	112100	6.38895	112100	6.02958	112100	5.86148	112100	4.32933	112100	8.76744	112100	2.28926	112100	3.43215	112100	2.05857	112100	2.55546
112200	2.66954	112200	2.43493	112200	2.1981	112200	3.11562	112200	4.46244	112200	2.20024	112200	2.97019	112200	6.50903	112200	6.10308	112200	5.85726	112200	4.46781	112200	8.71403	112200	2.31035	112200	3.45143	112200	2.14683	112200	2.56745
112300	2.69624	112300	2.48753	112300	2.16665	112300	3.21045	112300	4.503	112300	2.18597	112300	2.88707	112300	6.56133	112300	6.16871	112300	5.81577	112300	4.42942	112300	8.78533	112300	2.32191	112300	3.45456	112300	2.1325	112300	2.47003
112400	2.7404	112400	2.42306	112400	2.14698	112400	3.1668	112400	4.60097	112400	2.25759	112400	2.97327	112400	6.65751	112400	6.24647	112400	5.86242	112400	4.53806	112400	8.69051	112400	2.27021	112400	3.36724	112400	2.11554	112400	2.54752
112500	2.77719	112500	2.48659	112500	2.12832	112500	3.15308	112500	4.73732	112500	2.22384	112500	2.95439	112500	6.67907	112500	6.19339	112500	5.68236	112500	4.48543	112500	8.6888	112500	2.30443	112500	3.49436	112500	2.10534	112500	2.3954
112600	2.72174	112600	2.59703	112600	2.10826	112600	3.17831	112600	4.97529	112600	2.25115	112600	3.05494	112600	6.77092	112600	6.2846	112600	5.60865	112600	4.61605	112600	8.57028	112600	2.2117	112600	3.37714	112600	2.14154	112600	2.37809
112700	2.71424	112700	2.52049	112700	2.11335	112700	3.2521	112700	4.82873	112700	2.24879	112700	3.06259	112700	6.68986	112700	6.25782	112700	5.67766	112700	4.64525	112700	8.60092	112700	2.23178	112700	3.48307	112700	2.09285	112700	2.36627
112800	2.7521	112800	2.59887	112800	2.10232	112800	3.26058	112800	4.57128	112800	2.26471	112800	2.94437	112800	6.64594	112800	6.43543	112800	5.71828	112800	4.67387	112800	8.61871	112800	2.20117	112800	3.39657	112800	2.01793	112800	2.38174
112900	2.62211	112900	2.54904	112900	2.08431	112900	3.29065	112900	4.5445	112900	2.12667	112900	2.8693	112900	6.57883	112900	6.48545	112900	5.88178	112900	4.55189	112900	8.56964	112900	2.30971	112900	3.41252	112900	2.06798	112900	2.2437
113000	2.67074	113000	2.52215	113000	2.1143	113000	3.25635	113000	4.8822	113000	2.19687	113000	2.93374	113000	6.46683	113000	6.39392	113000	5.98801	113000	4.54036	113000	8.60416	113000	2.31223	113000	3.5036	113000	1.96006	113000	2.28966
113100	2.64714	113100	2.56971	113100	2.14204	113100	3.23904	113100	4.93477	113100	2.19687	113100	2.88194	113100	6.58823	113100	6.38464	113100	5.88867	113100	4.5422	113100	8.60471	113100	2.25601	113100	3.51213	113100	1.96304	113100	2.30217
113200	2.62622	113200	2.56029	113200	2.13058	113200	3.30291	113200	5.06902	113200	2.14304	113200	2.88546	113200	6.58748	113200	6.26432	113200	5.87097	113200	4.51524	113200	8.59236	113200	2.22659	113200	3.52361	113200	2.03088	113200	2.22921
113300	2.69408	113300	2.55735	113300	2.13012	113300	3.25955	113300	4.93038	113300	2.23099	113300	2.97342	113300	6.59356	113300	6.24772	113300	5.8503	113300	4.5731	113300	8.65605	113300	2.23504	113300	3.50173	113300	2.08301	113300	2.31955
113400	2.61648	113400	2.56738	113400	2.15581	113400	3.19651	113400	5.04212	113400	2.31689	113400	2.95917	113400	6.4904	113400	6.22441	113400	5.63648	113400	4.50214	113400	8.767	113400	2.23407	113400	3.47722	113400	2.04623	113400	2.25081
113500	2.59199	113500	2.4917	113500	2.15705	113500	3.15603	113500	4.98811	113500	2.24991	113500	3.00663	113500	6.41857	113500	6.00409	113500	5.65803	113500	4.47011	113500	8.66539	113500	2.15362	113500	3.49671	113500	2.11702	113500	2.20317
113600	2.54999	113600	2.53649	113600	2.1329	113600	3.17709	113600	4.85191	113600	2.30795	113600	2.97992	113600	6.39114	113600	6.03112	113600	5.66364	113600	4.52794	113600	8.83637	113600	2.22932	113600	3.43024	113600	2.05306	113600	2.27803
113700	2.62088	113700	2.52688	113700	2.12503	113700	3.16779	113700	4.76073	113700	2.35388	113700	2.85318	113700	6.48564	113700	6.16521	113700	5.48165	113700	4.52736	113700	8.89869	113700	2.33582	113700	3.34287	113700	2.08683	113700	2.22799
113800	2.58635	113800	2.50133	113800	2.13425	113800	3.19117	113800	4.84361	113800	2.33067	113800	2.87431	113800	6.43611	113800	6.23874	113800	5.48644	113800	4.61214	113800	8.87696	113800	2.35692	113800	3.26467	113800	2.08935	113800	2.1705
113900	2.49514	113900	2.57063	113900	2.16778	113900	3.28434	113900	4.86181	113900	2.34512	113900	2.89087	113900	6.32727	113900	6.19575	113900	5.52995	113900	4.52478	113900	8.66641	113900	2.33955	113900	3.21485	113900	2.09465	113900	2.03086
114000	2.54046	114000	2.44435	114000	2.17807	114000	3.2212	114000	4.70104	114000	2.30912	114000	2.92926	114000	6.33261	114000	6.31347	114000	5.3303	114000	4.44293	114000	8.61238	114000	2.24469	114000	3.18289	114000	2.08293	114000	2.04297
114100	2.54912	114100	2.48579	114100	2.14707	114100	3.28874	114100	4.94943	114100	2.27625	114100	2.93744	114100	6.49695	114100	6.24139	114100	5.34831	114100	4.47886	114100	8.66554	114100	2.32073	114100	3.22437	114100	1.95048	114100	2.01491
114200	2.51808	114200	2.51761	114200	2.13466	114200	3.16416	114200	5.08489	114200	2.22012	114200	2.88965	114200	6.51815	114200	6.19714	114200	5.28474	114200	4.43699	114200	8.74557	114200	2.32592	114200	3.19632	114200	2.00497	114200	2.15538
114300	2.57867	114300	2.47293	114300	2.13368	114300	3.21277	114300	4.95863	114300	2.24159	114300	2.92578	114300	6.67225	114300	6.17412	114300	5.26246	114300	4.51164	114300	8.63824	114300	2.27946	114300	3.1607	114300	2.03355	114300	2.14289
114400	2.52003	114400	2.58114	114400	2.12466	114400	3.20404	114400	5.13122	114400	2.22096	114400	2.98155	114400	6.57018	114400	6.17698	114400	5.29363	114400	4.49973	114400	8.51445	114400	2.21369	114400	3.18555	114400	1.9597	114400	2.09308
114500	2.59341	114500	2.55457	114500	2.11651	114500	3.1333	114500	5.24407	114500	2.2617	114500	2.96039	114500	6.7116	114500	6.19482	114500	5.25218	114500	4.53588	114500	8.46322	114500	2.14689	114500	3.21561	114500	2.02484	114500	2.2325
114600	2.55444	114600	2.49342	114600	2.20176	114600	3.16924	114600	5.15219	114600	2.27905	114600	2.99473	114600	6.7791	114600	6.28952	114600	5.142	114600	4.54649	114600	8.55485	114600	2.14326	114600	3.20219	114600	1.96649	114600	2.24403
114700	2.58039	114700	2.49484	114700	2.23393	114700	3.16811	114700	4.90065	114700	2.31219	114700	2.90666	114700	6.83283	114700	6.36721	114700	5.14861	114700	4.59386	114700	8.5447	114700	2.19615	114700	3.26881	114700	2.01916	114700	2.30173
114800	2.68246	114800	2.49419	114800	2.21099	114800	3.2079	114800	4.8794	114800	2.25056	114800	2.81183	114800	6.67311	114800	6.23094	114800	5.27486	114800	4.42559	114800	8.59844	114800	2.13136	114800	3.2046	114800	1.9937	114800	2.35021
114900	2.6188	114900	2.50624	114900	2.21824	114900	3.23563	114900	4.98721	114900	2.27301	114900	2.77964	114900	6.80341	114900	6.22116	114900	5.27501	114900	4.49141	114900	8.43117	114900	2.08615	114900	3.18052	114900	1.96685	114900	2.36969
115000	2.63211	115000	2.50026	115000	2.22917	115000	3.22157	115000	5.04565	115000	2.24247	115000	2.75311	115000	6.67587	115000	6.46748	115000	5.15449	115000	4.52305	115000	8.6608	115000	2.13061	115000	3.21846	115000	2.00481	115000	2.51236
115100	2.58221	115100	2.44285	115100	2.24251	115100	3.21185	115100	5.15159	115100	2.2604	115100	2.75143	115100	6.6377	115100	6.36429	115100	5.12587	115100	4.54454	115100	8.90674	115100	2.08497	115100	3.23491	115100	1.99608	115100	2.54761
115200	2.5934	115200	2.49042	115200	2.25773	115200	3.17236	115200	5.3175	115200	2.19788	115200	2.84838	115200	6.76377	115200	6.38606	115200	5.16315	115200	4.45429	115200	8.90277	115200	2.06789	115200	3.20678	115200	2.00845	115200	2.67307
115300	2.55185	115300	2.41183	115300	2.24128	115300	3.22462	115300	5.24148	115300	2.1578	115300	2.88209	115300	6.6892	115300	6.30067	115300	5.28166	115300	4.39555	115300	8.88282	115300	2.12186	115300	3.1982	115300	2.05245	115300	2.59155
115400	2.6025	115400	2.43365	115400	2.24701	115400	3.17554	115400	5.41045	115400	2.2051	115400	2.81892	115400	6.54416	115400	6.34695	115400	5.31657	115400	4.46179	115400	8.81965	115400	2.16062	115400	3.2229	115400	2.02772	115400	2.52844
115500	2.60907	115500	2.39077	115500	2.25528	115500	3.14507	115500	5.36824	115500	2.2557	115500	2.83024	115500	6.60132	115500	6.3992	115500	5.41041	115500	4.34748	115500	8.77971	115500	2.0923	115500	3.18659	115500	2.08564	115500	2.48812
115600	2.60184	115600	2.34968	115600	2.24834	115600	3.05005	115600	5.24675	115600	2.20933	115600	2.80501	115600	6.58411	115600	6.47454	115600	5.48577	115600	4.43124	115600	8.76908	115600	2.12605	115600	3.19639	115600	2.06287	115600	2.45463
115700	2.58758	115700	2.36349	115700	2.23706	115700	3.17952	115700	5.28992	115700	2.21497	115700	2.72322	115700	6.64913	115700	6.54297	115700	5.55174	115700	4.35972	115700	8.83294	115700	2.12479	115700	3.25981	115700	2.10311	115700	2.39861
115800	2.64918	115800	2.35796	115800	2.2343	115800	3.23414	115800	5.39605	115800	2.32176	115800	2.60512	115800	6.67027	115800	6.65595	115800	5.53224	115800	4.34517	115800	8.83623	115800	2.08984	115800	3.24651	115800	2.07813	115800	2.45739
115900	2.70133	115900	2.47292	115900	2.27107	115900	3.35039	115900	5.46536	115900	2.35553	115900	2.60245	115900	6.69498	115900	6.55606	115900	5.60543	115900	4.41628	115900	8.65882	115900	2.15297	115900	3.22331	115900	2.09032	115900	2.47899
116000	2.64219	116000	2.3775	116000	2.28626	116000	3.40097	116000	5.45829	116000	2.2745	116000	2.59727	116000	6.69087	116000	6.56076	116000	5.57452	116000	4.36692	116000	8.60147	116000	2.10049	116000	3.26485	116000	2.06229	116000	2.53794
116100	2.71273	116100	2.38178	116100	2.28724	116100	3.46277	116100	5.46261	116100	2.36936	116100	2.64751	116100	6.68504	116100	6.42627	116100	5.61578	116100	4.444	116100	8.79018	116100	2.06454	116100	3.28724	116100	2.09837	116100	2.54143
116200	2.68079	116200	2.30126	116200	2.28268	116200	3.4138	116200	5.44058	116200	2.28622	116200	2.73879	116200	6.72941	116200	6.47326	116200	5.5353	116200	4.48868	116200	8.62695	116200	2.1385	116200	3.24346	116200	2.10366	116200	2.60077
116300	2.67762	116300	2.36661	116300	2.34199	116300	3.39678	116300	5.43728	116300	2.30244	116300	2.7427	116300	6.70966	116300	6.44713	116300	5.49838	116300	4.44665	116300	8.73795	116300	2.22637	116300	3.22091	116300	2.08777	116300	2.50904
116400	2.6261	116400	2.37743	116400	2.24287	116400	3.36833	116400	5.30096	116400	2.30515	116400	2.73094	116400	6.79557	116400	6.50764	116400	5.41183	116400	4.51481	116400	8.78558	116400	2.21425	116400	3.304	116400	2.0599	116400	2.55243
116500	2.64436	116500	2.3768	116500	2.28903	116500	3.32495	116500	5.41407	116500	2.31431	116500	2.84677	116500	6.73719	116500	6.41903	116500	5.53281	116500	4.57516	116500	8.74094	116500	2.17575	116500	3.22461	116500	2.03277	116500	2.50744
116600	2.52624	116600	2.42348	116600	2.29866	116600	3.36558	116600	5.33279	116600	2.37452	116600	2.91808	116600	6.85889	116600	6.47135	116600	5.52548	116600	4.50494	116600	8.7285	116600	2.17409	116600	3.17682	116600	1.95298	116600	2.43711
116700	2.56407	116700	2.3949	116700	2.26747	116700	3.24844	116700	5.5255	116700	2.28253	116700	2.98612	116700	6.7646	116700	6.53149	116700	5.4968	116700	4.56375	116700	8.70346	116700	2.25671	116700	3.20677	116700	1.90119	116700	2.44324
116800	2.51756	116800	2.36487	116800	2.26755	116800	3.34568	116800	5.59432	116800	2.22546	116800	2.94614	116800	6.74078	116800	6.55344	116800	5.63651	116800	4.50954	116800	8.80164	116800	2.19711	116800	3.19446	116800	1.95968	116800	2.4458
116900	2.53848	116900	2.31006	116900	2.26073	116900	3.33244	116900	5.50552	116900	2.20563	116900	2.88737	116900	6.79459	116900	6.52828	116900	5.67548	116900	4.4797	116900	8.95852	116900	2.17991	116900	3.16986	116900	1.99699	116900	2.51549
117000	2.59296	117000	2.37074	117000	2.1695	117000	3.20642	117000	5.51539	117000	2.23257	117000	2.87475	117000	7.13453	117000	6.42175	117000	5.66179	117000	4.4323	117000	8.89704	117000	2.2206	117000	3.15982	117000	1.94907	117000	2.49289
117100	2.6356	117100	2.36203	117100	2.25373	117100	3.27042	117100	5.47519	117100	2.2459	117100	2.83415	117100	7.09961	117100	6.49495	117100	5.65825	117100	4.45989	117100	9.01005	117100	2.22658	117100	3.22892	117100	2.00219	117100	2.45039
117200	2.61827	117200	2.35325	117200	2.24818	117200	3.31601	117200	5.40149	117200	2.24593	117200	2.81164	117200	7.1963	117200	6.42998	117200	5.65081	117200	4.44862	117200	9.12473	117200	2.19746	117200	3.25307	117200	1.99325	117200	2.36024
117300	2.66098	117300	2.3714	117300	2.2314	117300	3.27354	117300	5.497	117300	2.23528	117300	2.85633	117300	7.18559	117300	6.41906	117300	5.6258	117300	4.39729	117300	9.22561	117300	2.12151	117300	3.18725	117300	2.01868	117300	2.34526
117400	2.69046	117400	2.34514	117400	2.24643	117400	3.3513	117400	5.56109	117400	2.23044	117400	2.8422	117400	7.20021	117400	6.60624	117400	5.62025	117400	4.36394	117400	9.11799	117400	2.17647	117400	3.17834	117400	1.96248	117400	2.39812
117500	2.63939	117500	2.36511	117500	2.20284	117500	3.38712	117500	5.53774	117500	2.31524	117500	2.75119	117500	7.216	117500	6.54883	117500	5.5897	117500	4.4139	117500	9.01401	117500	2.11409	117500	3.18461	117500	1.94921	117500	2.3138
117600	2.6427	117600	2.30083	117600	2.20579	117600	3.45239	117600	5.5544	117600	2.34177	117600	2.85276	117600	7.18429	117600	6.43406	117600	5.65965	117600	4.37098	117600	8.98764	117600	2.16427	117600	3.19687	117600	1.92837	117600	2.39851
117700	2.56611	117700	2.28717	117700	2.19614	117700	3.33001	117700	5.79061	117700	2.33762	117700	2.90169	117700	7.28381	117700	6.32295	117700	5.73561	117700	4.3639	117700	8.98698	117700	2.11729	117700	3.21293	117700	1.88834	117700	2.24854
117800	2.58665	117800	2.33594	117800	2.23481	117800	3.51619	117800	5.71009	117800	2.2714	117800	2.85107	117800	7.49198	117800	6.43429	117800	5.78089	117800	4.42716	117800	9.18264	117800	2.15109	117800	3.27403	117800	1.86935	117800	2.20484
117900	2.49889	117900	2.34659	117900	2.25493	117900	3.45986	117900	5.74147	117900	2.28584	117900	2.8479	117900	7.60071	117900	6.48032	117900	5.87977	117900	4.44599	117900	9.26327	117900	2.1271	117900	3.26414	117900	1.90692	117900	2.3199
118000	2.4876	118000	2.32189	118000	2.25216	118000	3.51889	118000	5.66342	118000	2.28702	118000	2.88989	118000	7.41509	118000	6.49429	118000	5.80706	118000	4.46662	118000	9.05793	118000	2.1787	118000	3.30125	118000	1.90327	118000	2.18652
118100	2.49828	118100	2.438	118100	2.24233	118100	3.45784	118100	5.54066	118100	2.36712	118100	2.78065	118100	7.36553	118100	6.63596	118100	5.87281	118100	4.45302	118100	9.01565	118100	2.11136	118100	3.23698	118100	1.90439	118100	2.25168
118200	2.49791	118200	2.36059	118200	2.2393	118200	3.38272	118200	5.53367	118200	2.17918	118200	2.74511	118200	7.29364	118200	6.58315	118200	5.92877	118200	4.35497	118200	8.79047	118200	2.05018	118200	3.25369	118200	1.87287	118200	2.35748
118300	2.53145	118300	2.34561	118300	2.24726	118300	3.40821	118300	5.43069	118300	2.24419	118300	2.77461	118300	7.18318	118300	6.64924	118300	5.95416	118300	4.4133	118300	8.72528	118300	2.07307	118300	3.29865	118300	1.87638	118300	2.29629
118400	2.41989	118400	2.28543	118400	2.2864	118400	3.46665	118400	5.59896	118400	2.27864	118400	2.6334	118400	7.29573	118400	6.50979	118400	6.01613	118400	4.42964	118400	8.92202	118400	2.03909	118400	3.22306	118400	1.87743	118400	2.27003
118500	2.43756	118500	2.32442	118500	2.25893	118500	3.47312	118500	5.54932	118500	2.32449	118500	2.67883	118500	7.09498	118500	6.43212	118500	6.03926	118500	4.52942	118500	9.00251	118500	1.98941	118500	3.2547	118500	1.92638	118500	2.32546
118600	2.42268	118600	2.22588	118600	2.26298	118600	3.48217	118600	5.72253	118600	2.30458	118600	2.64019	118600	6.99408	118600	6.37649	118600	6.03927	118600	4.47602	118600	9.15206	118600	2.07165	118600	3.24278	118600	1.96651	118600	2.37702
118700	2.43	118700	2.28459	118700	2.21967	118700	3.42151	118700	5.63346	118700	2.30668	118700	2.55869	118700	6.90359	118700	6.40058	118700	5.98674	118700	4.52813	118700	9.07029	118700	2.0755	118700	3.3065	118700	1.99595	118700	2.2958
118800	2.43137	118800	2.33453	118800	2.25825	118800	3.36195	118800	5.66654	118800	2.32661	118800	2.60872	118800	6.74389	118800	6.29934	118800	6.02805	118800	4.54368	118800	9.10614	118800	2.0669	118800	3.32101	118800	1.96443	118800	2.37922
118900	2.48858	118900	2.31224	118900	2.20886	118900	3.5088	118900	5.67243	118900	2.32483	118900	2.57875	118900	6.7828	118900	6.15076	118900	6.05935	118900	4.549	118900	9.23374	118900	1.97466	118900	3.38314	118900	1.95598	118900	2.42831
119000	2.40892	119000	2.24581	119000	2.15375	119000	3.42644	119000	5.6731	119000	2.25103	119000	2.59731	119000	6.75564	119000	6.22633	119000	6.00556	119000	4.57411	119000	9.15812	119000	2.114	119000	3.33255	119000	1.86516	119000	2.49798
119100	2.34749	119100	2.31396	119100	2.15197	119100	3.49186	119100	5.63995	119100	2.24408	119100	2.54572	119100	6.91078	119100	6.31594	119100	5.92674	119100	4.5237	119100	9.08793	119100	2.08772	119100	3.30112	119100	1.95267	119100	2.5066
119200	2.38485	119200	2.35841	119200	2.15405	119200	3.5266	119200	5.6136	119200	2.37529	119200	2.60352	119200	7.00367	119200	6.36218	119200	5.88692	119200	4.5889	119200	9.10003	119200	2.12366	119200	3.36291	119200	1.9294	119200	2.49282
119300	2.52247	119300	2.38888	119300	2.14881	119300	3.53341	119300	5.7778	119300	2.3104	119300	2.63927	119300	7.08997	119300	6.22865	119300	5.88697	119300	4.52502	119300	9.15228	119300	2.10139	119300	3.27672	119300	1.9465	119300	2.54135
119400	2.49031	119400	2.40814	119400	2.13307	119400	3.43802	119400	5.56734	119400	2.2862	119400	2.62672	119400	7.03514	119400	6.38355	119400	5.86219	119400	4.56263	119400	9.26261	119400	2.10806	119400	3.35477	119400	1.92678	119400	2.48969
119500	2.4747	119500	2.29408	119500	2.18651	119500	3.43724	119500	5.65586	119500	2.29776	119500	2.64432	119500	7.08845	119500	6.41414	119500	5.91691	119500	4.59103	119500	9.23502	119500	2.12631	119500	3.35116	119500	1.9311	119500	2.4591
119600	2.52467	119600	2.34992	119600	2.186	119600	3.43164	119600	5.34821	119600	2.27214	119600	2.57506	119600	7.19032	119600	6.4429	119600	5.92171	119600	4.63166	119600	9.06845	119600	2.0882	119600	3.36428	119600	1.93857	119600	2.46798
119700	2.55865	119700	2.36794	119700	2.14846	119700	3.37168	119700	5.47705	119700	2.32374	119700	2.56266	119700	7.23302	119700	6.41572	119700	5.96251	119700	4.62108	119700	8.94715	119700	2.12771	119700	3.33726	119700	1.94881	119700	2.41913
119800	2.61177	119800	2.28793	119800	2.14551	119800	3.30515	119800	5.51989	119800	2.31252	119800	2.58344	119800	7.24671	119800	6.35369	119800	5.79245	119800	4.59646	119800	9.11239	119800	2.05652	119800	3.34125	119800	1.93568	119800	2.46251
119900	2.6912	119900	2.37362	119900	2.08016	119900	3.28559	119900	5.44802	119900	2.31997	119900	2.60281	119900	6.90736	119900	6.4583	119900	5.89589	119900	4.53906	119900	9.11548	119900	2.03448	119900	3.32781	119900	1.92309	119900	2.37836
120000	2.64759	120000	2.31603	120000	2.13147	120000	3.28685	120000	5.33087	120000	2.31233	120000	2.61226	120000	6.89101	120000	6.36422	120000	6.04418	120000	4.58272	120000	9.24129	120000	2.05506	120000	3.32961	120000	1.866	120000	2.38647
120100	2.62424	120100	2.3275	120100	2.14401	120100	3.14314	120100	5.29134	120100	2.26088	120100	2.54174	120100	6.85566	120100	6.32771	120100	5.97129	120100	4.61124	120100	9.13504	120100	2.05608	120100	3.33874	120100	1.88569	120100	2.32903
120200	2.67096	120200	2.429	120200	2.11371	120200	3.08647	120200	5.24515	120200	2.19929	120200	2.525	120200	6.74295	120200	6.38145	120200	6.05885	120200	4.54481	120200	9.06563	120200	2.03792	120200	3.30893	120200	1.8444	120200	2.3988
120300	2.75689	120300	2.44497	120300	2.16909	120300	3.036	120300	5.20059	120300	2.278	120300	2.57912	120300	6.91017	120300	6.46205	120300	6.17421	120300	4.61223	120300	9.08168	120300	2.04636	120300	3.31875	120300	1.86714	120300	2.4093
120400	2.75516	120400	2.55429	120400	2.15308	120400	3.0357	120400	5.04731	120400	2.21055	120400	2.60885	120400	6.99771	120400	6.64172	120400	6.20756	120400	4.66088	120400	9.12618	120400	2.07101	120400	3.38344	120400	1.92085	120400	2.35284
120500	2.69441	120500	2.55313	120500	2.16312	120500	3.08297	120500	5.11113	120500	2.17041	120500	2.61886	120500	7.14323	120500	6.83204	120500	6.03656	120500	4.67439	120500	9.24002	120500	2.06724	120500	3.37964	120500	1.8678	120500	2.48896
120600	2.68511	120600	2.56956	120600	2.14854	120600	3.07786	120600	4.88306	120600	2.15409	120600	2.666	120600	7.31715	120600	6.61716	120600	5.81533	120600	4.69486	120600	9.15735	120600	1.99794	120600	3.39852	120600	1.87665	120600	2.52821
120700	2.74136	120700	2.5948	120700	2.11007	120700	3.03684	120700	4.75054	120700	2.1719	120700	2.66837	120700	7.26296	120700	6.60437	120700	6.0118	120700	4.65452	120700	9.21055	120700	2.04064	120700	3.44494	120700	2.03043	120700	2.57528
120800	2.76237	120800	2.60429	120800	2.15297	120800	3.0628	120800	4.83014	120800	2.13235	120800	2.6884	120800	7.20556	120800	6.51842	120800	6.02311	120800	4.58483	120800	9.3048	120800	2.038	120800	3.41204	120800	1.93284	120800	2.54348
120900	2.65071	120900	2.55744	120900	2.17591	120900	3.09432	120900	5.00776	120900	2.1551	120900	2.72538	120900	7.02308	120900	6.37455	120900	6.03881	120900	4.60348	120900	9.576	120900	2.01034	120900	3.41384	120900	1.88447	120900	2.4504
121000	2.67101	121000	2.4858	121000	2.17302	121000	3.14534	121000	5.01559	121000	2.13252	121000	2.62268	121000	7.16417	121000	6.51286	121000	6.19427	121000	4.49603	121000	9.71851	121000	1.99135	121000	3.38476	121000	1.94053	121000	2.4086
121100	2.72615	121100	2.50209	121100	2.13042	121100	3.20686	121100	4.78952	121100	2.14257	121100	2.73546	121100	7.08275	121100	6.37008	121100	6.23174	121100	4.40593	121100	9.89435	121100	2.01667	121100	3.36046	121100	1.92354	121100	2.40685
121200	2.85348	121200	2.52547	121200	2.23945	121200	3.22082	121200	4.78713	121200	2.18405	121200	2.73602	121200	7.11456	121200	6.48269	121200	6.04316	121200	4.49852	121200	9.89692	121200	2.02673	121200	3.3469	121200	1.89791	121200	2.26786
121300	2.73607	121300	2.56435	121300	2.19558	121300	3.23922	121300	5.08088	121300	2.2667	121300	2.75535	121300	7.05361	121300	6.4704	121300	5.97902	121300	4.44183	121300	10.02	121300	2.04203	121300	3.28229	121300	1.91513	121300	2.25691
121400	2.70969	121400	2.50103	121400	2.18103	121400	3.22457	121400	5.03688	121400	2.26705	121400	2.66376	121400	7.08884	121400	6.44681	121400	5.94229	121400	4.39514	121400	10.1621	121400	2.0479	121400	3.35614	121400	1.87536	121400	2.20803
121500	2.74543	121500	2.47908	121500	2.17541	121500	3.15165	121500	5.03288	121500	2.26954	121500	2.6656	121500	6.92534	121500	6.44941	121500	5.99821	121500	4.40776	121500	10.2961	121500	2.01923	121500	3.38628	121500	1.83713	121500	2.24741
121600	2.673	121600	2.46178	121600	2.12069	121600	3.21946	121600	5.27828	121600	2.27998	121600	2.74325	121600	6.88442	121600	6.60547	121600	5.85266	121600	4.423	121600	10.2572	121600	2.01465	121600	3.42298	121600	1.85177	121600	2.23459
121700	2.67344	121700	2.41858	121700	2.15561	121700	3.13729	121700	5.36607	121700	2.34902	121700	2.59705	121700	6.84931	121700	6.48789	121700	5.84841	121700	4.4752	121700	10.1862	121700	1.99597	121700	3.50476	121700	1.88214	121700	2.14719
121800	2.60991	121800	2.46628	121800	2.18329	121800	3.15081	121800	5.26143	121800	2.29385	121800	2.63697	121800	6.9606	121800	6.34829	121800	5.82947	121800	4.49784	121800	10.231	121800	2.11076	121800	3.4788	121800	1.94191	121800	2.27073
121900	2.62433	121900	2.46836	121900	2.20491	121900	3.26256	121900	5.42737	121900	2.23169	121900	2.64847	121900	7.10394	121900	6.57912	121900	5.88389	121900	4.53864	121900	10.1785	121900	2.08716	121900	3.53483	121900	1.90244	121900	2.34729
122000	2.69438	122000	2.3877	122000	2.2698	122000	3.24667	122000	5.5414	122000	2.26337	122000	2.63205	122000	7.044	122000	6.52283	122000	5.89574	122000	4.5112	122000	10.2173	122000	2.05065	122000	3.39337	122000	1.8854	122000	2.33142
122100	2.68403	122100	2.47158	122100	2.19772	122100	3.23439	122100	5.70602	122100	2.24119	122100	2.66757	122100	6.93598	122100	6.69385	122100	5.89329	122100	4.52197	122100	10.2076	122100	2.14408	122100	3.42549	122100	1.92293	122100	2.37116
122200	2.62066	122200	2.48893	122200	2.16156	122200	3.20894	122200	5.59925	122200	2.1924	122200	2.69333	122200	6.89463	122200	6.7648	122200	5.79828	122200	4.49101	122200	10.2927	122200	2.14671	122200	3.48873	122200	1.97798	122200	2.23186
122300	2.58937	122300	2.44423	122300	2.11248	122300	3.25647	122300	5.5385	122300	2.2714	122300	2.68001	122300	6.80098	122300	6.75936	122300	5.77902	122300	4.49942	122300	10.3578	122300	2.15882	122300	3.40698	122300	1.92432	122300	2.20139
122400	2.58288	122400	2.40978	122400	2.13654	122400	3.18844	122400	5.31414	122400	2.34101	122400	2.66591	122400	6.83648	122400	6.64191	122400	5.77406	122400	4.48718	122400	10.2674	122400	2.1147	122400	3.42845	122400	1.90999	122400	2.19648
122500	2.50764	122500	2.41978	122500	2.15671	122500	3.29249	122500	5.51926	122500	2.27794	122500	2.71447	122500	6.72346	122500	6.55005	122500	5.78715	122500	4.55543	122500	10.0816	122500	2.16379	122500	3.42899	122500	1.94425	122500	2.24705
122600	2.55293	122600	2.3372	122600	2.19889	122600	3.23487	122600	5.26197	122600	2.30901	122600	2.77815	122600	6.79199	122600	6.61175	122600	5.82586	122600	4.58518	122600	10.1562	122600	2.16907	122600	3.37548	122600	1.93463	122600	2.2203
122700	2.52582	122700	2.39078	122700	2.19765	122700	3.34125	122700	5.3365	122700	2.29006	122700	2.72019	122700	6.93001	122700	6.47255	122700	6.07565	122700	4.48282	122700	10.229	122700	2.15883	122700	3.41564	122700	1.88003	122700	2.24874
122800	2.58825	122800	2.412	122800	2.19095	122800	3.28126	122800	5.52623	122800	2.28507	122800	2.70663	122800	6.93384	122800	6.47834	122800	6.21865	122800	4.52633	122800	10.2784	122800	2.12866	122800	3.42922	122800	1.86208	122800	2.20834
122900	2.51215	122900	2.42974	122900	2.14102	122900	3.3683	122900	5.50648	122900	2.25627	122900	2.67173	122900	6.82866	122900	6.5413	122900	6.29346	122900	4.51902	122900	10.2587	122900	2.11036	122900	3.47784	122900	1.89776	122900	2.20827
123000	2.52234	123000	2.46473	123000	2.14006	123000	3.36946	123000	5.48962	123000	2.36101	123000	2.69968	123000	6.89706	123000	6.64112	123000	6.39158	123000	4.53159	123000	10.206	123000	2.03884	123000	3.48397	123000	1.94875	123000	2.27646
123100	2.60435	123100	2.47949	123100	2.18456	123100	3.35427	123100	5.46956	123100	2.40102	123100	2.68875	123100	6.88093	123100	6.58449	123100	6.22511	123100	4.58316	123100	10.3619	123100	2.10063	123100	3.51149	123100	1.90521	123100	2.23695
123200	2.60527	123200	2.47057	123200	2.16172	123200	3.32553	123200	5.35997	123200	2.35414	123200	2.74467	123200	6.75998	123200	6.66101	123200	6.13141	123200	4.52484	123200	10.6458	123200	2.09061	123200	3.47156	123200	1.87833	123200	2.28834
123300	2.69128	123300	2.50104	123300	2.17382	123300	3.43254	123300	5.35139	123300	2.35521	123300	2.7803	123300	6.60012	123300	6.50253	123300	6.13537	123300	4.55352	123300	10.5118	123300	2.11688	123300	3.39985	123300	1.8627	123300	2.40341
123400	2.72743	123400	2.41791	123400	2.16696	123400	3.41674	123400	5.34591	123400	2.38658	123400	2.75492	123400	6.58625	123400	6.69019	123400	6.07338	123400	4.47992	123400	10.4565	123400	2.07394	123400	3.35206	123400	1.92798	123400	2.48543
123500	2.69033	123500	2.37907	123500	2.2113	123500	3.41122	123500	5.27978	123500	2.42524	123500	2.73563	123500	6.48254	123500	6.70171	123500	6.1868	123500	4.48304	123500	10.6991	123500	2.12111	123500	3.37967	123500	1.96747	123500	2.46544
123600	2.72608	123600	2.36794	123600	2.231	123600	3.42461	123600	5.3614	123600	2.409	123600	2.73552	123600	6.47302	123600	6.62657	123600	6.12889	123600	4.49887	123600	10.681	123600	2.03596	123600	3.4163	123600	1.9963	123600	2.46694
123700	2.69205	123700	2.37502	123700	2.21616	123700	3.34194	123700	5.43217	123700	2.41352	123700	2.708	123700	6.52527	123700	6.47571	123700	6.0403	123700	4.51017	123700	10.6044	123700	2.11269	123700	3.43467	123700	1.95567	123700	2.46665
123800	2.66358	123800	2.32863	123800	2.21016	123800	3.38037	123800	5.41033	123800	2.39613	123800	2.71553	123800	6.64576	123800	6.36272	123800	6.03201	123800	4.45944	123800	10.7299	123800	2.11147	123800	3.43911	123800	1.90562	123800	2.48193
123900	2.59617	123900	2.35295	123900	2.21924	123900	3.42381	123900	5.6396	123900	2.34262	123900	2.63392	123900	6.88571	123900	6.53681	123900	6.13995	123900	4.51914	123900	10.8276	123900	2.13021	123900	3.42926	123900	1.91038	123900	2.43637
124000	2.58925	124000	2.40275	124000	2.14915	124000	3.396	124000	5.77273	124000	2.32153	124000	2.68061	124000	6.88559	124000	6.43817	124000	6.20195	124000	4.55254	124000	10.9487	124000	2.11536	124000	3.45855	124000	1.94053	124000	2.48083
124100	2.62086	124100	2.35004	124100	2.22999	124100	3.38255	124100	5.78316	124100	2.26831	124100	2.73708	124100	6.81964	124100	6.27855	124100	6.31667	124100	4.52108	124100	10.914	124100	2.10873	124100	3.41085	124100	1.96471	124100	2.47364
124200	2.60051	124200	2.40547	124200	2.16413	124200	3.43709	124200	5.81658	124200	2.32164	124200	2.67275	124200	6.63951	124200	6.2272	124200	5.98546	124200	4.52586	124200	10.8804	124200	2.11092	124200	3.25639	124200	1.98821	124200	2.48987
124300	2.58789	124300	2.41604	124300	2.1654	124300	3.45038	124300	5.99897	124300	2.2352	124300	2.61353	124300	6.85743	124300	6.24238	124300	6.00338	124300	4.50556	124300	10.9415	124300	2.09407	124300	3.36677	124300	1.95021	124300	2.50351
124400	2.60304	124400	2.3912	124400	2.17633	124400	3.46419	124400	6.08795	124400	2.28528	124400	2.78077	124400	6.61519	124400	6.25483	124400	5.97062	124400	4.51578	124400	10.8486	124400	2.13414	124400	3.35766	124400	1.91428	124400	2.41986
124500	2.62063	124500	2.44769	124500	2.18628	124500	3.37298	124500	6.12376	124500	2.23922	124500	2.7084	124500	6.79458	124500	6.24988	124500	5.83804	124500	4.61909	124500	10.6715	124500	2.05479	124500	3.37122	124500	1.98477	124500	2.4762
124600	2.55899	124600	2.3973	124600	2.17638	124600	3.21663	124600	6.12068	124600	2.28781	124600	2.66927	124600	6.70915	124600	6.26923	124600	5.95626	124600	4.68075	124600	10.8691	124600	2.07953	124600	3.38074	124600	1.9883	124600	2.41525
124700	2.53873	124700	2.35697	124700	2.17395	124700	3.25892	124700	6.12277	124700	2.29889	124700	2.67943	124700	6.55983	124700	6.37617	124700	6.06278	124700	4.79681	124700	10.8937	124700	2.07624	124700	3.41662	124700	1.99239	124700	2.50155
124800	2.55255	124800	2.41663	124800	2.12327	124800	3.39241	124800	6.28415	124800	2.22671	124800	2.67578	124800	6.5613	124800	6.32606	124800	6.13793	124800	4.79563	124800	10.9643	124800	2.06519	124800	3.43766	124800	2.00073	124800	2.46448
124900	2.5607	124900	2.41327	124900	2.18057	124900	3.28532	124900	6.34408	124900	2.22819	124900	2.67295	124900	6.66756	124900	6.41175	124900	6.09074	124900	4.79381	124900	10.8122	124900	2.05218	124900	3.44187	124900	2.01334	124900	2.53702
125000	2.53834	125000	2.4511	125000	2.13121	125000	3.34119	125000	6.22621	125000	2.17233	125000	2.56981	125000	6.68047	125000	6.41123	125000	6.22861	125000	4.79927	125000	10.6584	125000	2.05413	125000	3.48424	125000	2.11228	125000	2.59611
125100	2.53537	125100	2.44231	125100	2.12893	125100	3.33403	125100	6.3967	125100	2.20582	125100	2.57856	125100	6.6487	125100	6.4304	125100	6.10066	125100	4.73236	125100	10.4972	125100	2.06165	125100	3.526	125100	2.05147	125100	2.47858
125200	2.56574	125200	2.47263	125200	2.11692	125200	3.2731	125200	6.37317	125200	2.14079	125200	2.6443	125200	6.46683	125200	6.44056	125200	6.13681	125200	4.75733	125200	10.3893	125200	2.06836	125200	3.55537	125200	2.00588	125200	2.58304
125300	2.66256	125300	2.42982	125300	2.11394	125300	3.25344	125300	6.4322	125300	2.19943	125300	2.67901	125300	6.24463	125300	6.48851	125300	6.11027	125300	4.70761	125300	10.4027	125300	2.01088	125300	3.56666	125300	2.03021	125300	2.47992
125400	2.64389	125400	2.46231	125400	2.17721	125400	3.2115	125400	6.70065	125400	2.20975	125400	2.71432	125400	6.40777	125400	6.47067	125400	6.16495	125400	4.66153	125400	10.4919	125400	2.04481	125400	3.53292	125400	2.00877	125400	2.5516
125500	2.55485	125500	2.44478	125500	2.21459	125500	3.19868	125500	6.78279	125500	2.08852	125500	2.74219	125500	6.3619	125500	6.54058	125500	6.14986	125500	4.74097	125500	10.5051	125500	2.08662	125500	3.57304	125500	2.00863	125500	2.57352
125600	2.59124	125600	2.40078	125600	2.29621	125600	3.32669	125600	6.88377	125600	2.12236	125600	2.7255	125600	6.25942	125600	6.40563	125600	6.21596	125600	4.7589	125600	10.5532	125600	2.03885	125600	3.62368	125600	1.97295	125600	2.61925
125700	2.5955	125700	2.47882	125700	2.22459	125700	3.28432	125700	6.91638	125700	2.15324	125700	2.72077	125700	6.40543	125700	6.27973	125700	6.21043	125700	4.77874	125700	10.6808	125700	2.03497	125700	3.50684	125700	1.98006	125700	2.57272
125800	2.54821	125800	2.47262	125800	2.29365	125800	3.31582	125800	6.64575	125800	2.15484	125800	2.7469	125800	6.54	125800	6.39631	125800	6.3546	125800	4.71968	125800	10.7684	125800	2.04887	125800	3.54352	125800	1.97113	125800	2.67753
125900	2.52802	125900	2.51895	125900	2.22575	125900	3.21581	125900	6.55963	125900	2.17618	125900	2.81179	125900	6.31021	125900	6.34816	125900	6.40306	125900	4.66971	125900	10.7563	125900	2.04213	125900	3.53468	125900	1.99247	125900	2.53837
126000	2.52341	126000	2.54269	126000	2.26675	126000	3.24599	126000	6.63387	126000	2.12886	126000	2.80519	126000	6.36669	126000	6.38423	126000	6.45325	126000	4.55683	126000	10.7273	126000	2.06752	126000	3.4834	126000	1.90248	126000	2.53579
126100	2.55607	126100	2.47197	126100	2.23234	126100	3.22061	126100	6.62278	126100	2.17742	126100	2.80752	126100	6.37866	126100	6.49657	126100	6.35727	126100	4.53921	126100	10.9108	126100	2.01377	126100	3.48722	126100	1.9503	126100	2.5449
126200	2.61623	126200	2.44921	126200	2.34607	126200	3.19321	126200	6.58923	126200	2.21118	126200	2.80519	126200	6.25568	126200	6.42798	126200	6.29786	126200	4.4813	126200	10.7928	126200	2.01723	126200	3.46497	126200	1.89235	126200	2.5679
126300	2.63078	126300	2.41037	126300	2.31035	126300	3.22296	126300	6.56695	126300	2.31265	126300	2.80174	126300	6.12951	126300	6.64703	126300	6.23705	126300	4.4045	126300	10.7364	126300	1.982	126300	3.44572	126300	1.90372	126300	2.64847
126400	2.65689	126400	2.37776	126400	2.29899	126400	3.33524	126400	6.45168	126400	2.24034	126400	2.746	126400	6.3998	126400	6.56984	126400	6.29682	126400	4.49744	126400	10.7503	126400	1.98665	126400	3.49684	126400	1.95193	126400	2.70367
126500	2.75802	126500	2.30704	126500	2.32701	126500	3.40322	126500	6.61646	126500	2.2845	126500	2.83139	126500	6.41093	126500	6.45702	126500	6.37269	126500	4.49343	126500	10.7244	126500	1.98704	126500	3.48061	126500	2.03446	126500	2.64856
126600	2.705	126600	2.29669	126600	2.31515	126600	3.45913	126600	6.77482	126600	2.21699	126600	2.79838	126600	6.30841	126600	6.29679	126600	6.35291	126600	4.40317	126600	10.7259	126600	1.95825	126600	3.4388	126600	1.99095	126600	2.68534
126700	2.784	126700	2.32924	126700	2.37229	126700	3.38103	126700	6.76812	126700	2.21501	126700	2.72801	126700	6.34971	126700	6.43332	126700	6.39609	126700	4.50047	126700	10.6196	126700	1.97915	126700	3.47616	126700	1.99425	126700	2.59865
126800	2.76896	126800	2.34583	126800	2.36743	126800	3.4413	126800	6.39591	126800	2.27651	126800	2.68779	126800	6.25488	126800	6.28656	126800	6.3717	126800	4.5919	126800	10.6742	126800	1.9769	126800	3.46996	126800	2.01863	126800	2.66932
126900	2.81324	126900	2.41255	126900	2.3131	126900	3.3847	126900	6.3583	126900	2.24255	126900	2.71029	126900	6.39207	126900	6.17289	126900	6.33598	126900	4.61519	126900	10.652	126900	1.9662	126900	3.46678	126900	1.98963	126900	2.65416
127000	2.75769	127000	2.44925	127000	2.25094	127000	3.41922	127000	6.31711	127000	2.2539	127000	2.78216	127000	6.50726	127000	6.27989	127000	6.21982	127000	4.60298	127000	10.5895	127000	2.02262	127000	3.48806	127000	1.92143	127000	2.61407
127100	2.69527	127100	2.3333	127100	2.24936	127100	3.34603	127100	6.19245	127100	2.22718	127100	2.78339	127100	6.5879	127100	6.4553	127100	6.2739	127100	4.60753	127100	10.583	127100	2.00802	127100	3.43428	127100	1.9526	127100	2.73087
127200	2.74743	127200	2.39909	127200	2.22955	127200	3.34451	127200	6.17836	127200	2.25771	127200	2.71385	127200	6.77582	127200	6.49638	127200	6.33247	127200	4.47909	127200	10.3685	127200	2.02693	127200	3.3578	127200	1.94708	127200	2.67167
127300	2.71951	127300	2.37048	127300	2.33868	127300	3.37155	127300	6.11551	127300	2.25327	127300	2.72207	127300	6.7267	127300	6.37729	127300	6.2902	127300	4.51354	127300	10.4326	127300	2.0125	127300	3.40623	127300	1.84905	127300	2.67024
127400	2.71163	127400	2.35885	127400	2.31084	127400	3.43665	127400	6.00107	127400	2.26068	127400	2.7013	127400	6.6926	127400	6.51267	127400	6.42935	127400	4.55084	127400	10.5515	127400	1.97896	127400	3.39174	127400	1.84506	127400	2.73385
127500	2.71308	127500	2.38539	127500	2.26297	127500	3.43173	127500	5.94372	127500	2.29873	127500	2.7074	127500	6.53989	127500	6.4886	127500	6.32472	127500	4.60905	127500	10.8126	127500	2.00415	127500	3.40032	127500	1.86205	127500	2.76213
127600	2.73898	127600	2.34582	127600	2.26128	127600	3.46546	127600	6.24165	127600	2.36652	127600	2.76195	127600	6.63078	127600	6.46575	127600	6.29914	127600	4.5984	127600	10.8939	127600	2.01994	127600	3.4311	127600	1.83898	127600	2.78428
127700	2.73277	127700	2.32113	127700	2.31891	127700	3.43732	127700	6.20652	127700	2.33597	127700	2.78125	127700	6.59236	127700	6.31762	127700	6.38088	127700	4.65743	127700	10.8963	127700	2.01721	127700	3.44545	127700	1.88123	127700	2.8366
127800	2.65106	127800	2.38836	127800	2.2837	127800	3.42065	127800	6.08634	127800	2.32029	127800	2.77975	127800	6.66761	127800	6.15156	127800	6.32294	127800	4.64029	127800	10.96	127800	2.03948	127800	3.45326	127800	1.93362	127800	2.73282
127900	2.67151	127900	2.36511	127900	2.26437	127900	3.51369	127900	6.16099	127900	2.25645	127900	2.79505	127900	6.75265	127900	6.20068	127900	6.32383	127900	4.64614	127900	11.0881	127900	2.05199	127900	3.44531	127900	1.81856	127900	2.73178
128000	2.6648	128000	2.38842	128000	2.25966	128000	3.47708	128000	6.2605	128000	2.25277	128000	2.78514	128000	6.71562	128000	6.18555	128000	6.24615	128000	4.80631	128000	11.1364	128000	2.05309	128000	3.4365	128000	1.84977	128000	2.67224
128100	2.59291	128100	2.34908	128100	2.23125	128100	3.4544	128100	6.15285	128100	2.32362	128100	2.77475	128100	6.82682	128100	6.41391	128100	6.25389	128100	4.83175	128100	11.1114	128100	2.0753	128100	3.44497	128100	1.8652	128100	2.73391
128200	2.6717	128200	2.39738	128200	2.19449	128200	3.45625	128200	5.92198	128200	2.36794	128200	2.71945	128200	6.80882	128200	6.37986	128200	6.18569	128200	4.6793	128200	11.1986	128200	1.97833	128200	3.4734	128200	1.93475	128200	2.66415
128300	2.63408	128300	2.37598	128300	2.23197	128300	3.34598	128300	6.00766	128300	2.24343	128300	2.63548	128300	6.83232	128300	6.31282	128300	6.22339	128300	4.84671	128300	11.2199	128300	2.0425	128300	3.44085	128300	1.88198	128300	2.72569
128400	2.66123	128400	2.3986	128400	2.28513	128400	3.41545	128400	6.11103	128400	2.26761	128400	2.70089	128400	6.76635	128400	6.34606	128400	6.30555	128400	4.82548	128400	11.245	128400	2.05303	128400	3.47727	128400	1.90869	128400	2.85103
128500	2.65103	128500	2.39824	128500	2.27087	128500	3.45181	128500	6.53441	128500	2.32343	128500	2.71566	128500	6.92571	128500	6.28688	128500	6.28168	128500	4.89968	128500	11.0783	128500	2.0312	128500	3.43836	128500	1.92073	128500	2.8755
128600	2.68201	128600	2.44135	128600	2.29437	128600	3.3802	128600	6.70388	128600	2.26721	128600	2.78972	128600	6.82497	128600	6.17968	128600	6.32367	128600	4.97792	128600	11.1391	128600	2.05637	128600	3.41881	128600	1.87317	128600	2.81196
128700	2.70257	128700	2.3407	128700	2.35055	128700	3.3703	128700	6.61847	128700	2.37717	128700	2.74069	128700	6.82617	128700	6.11508	128700	6.35532	128700	4.89912	128700	11.0827	128700	2.04038	128700	3.40076	128700	1.87865	128700	2.92246
128800	2.74334	128800	2.41412	128800	2.34836	128800	3.37202	128800	6.98425	128800	2.26643	128800	2.76579	128800	6.6795	128800	6.1695	128800	6.33714	128800	4.81066	128800	11.0206	128800	2.02266	128800	3.39703	128800	1.9008	128800	2.82827
128900	2.70427	128900	2.40307	128900	2.32857	128900	3.37789	128900	7.06698	128900	2.30349	128900	2.78982	128900	6.79506	128900	6.22447	128900	6.33027	128900	4.77065	128900	10.923	128900	1.97788	128900	3.43262	128900	1.80121	128900	2.93735
129000	2.65509	129000	2.3589	129000	2.23185	129000	3.40995	129000	7.20756	129000	2.26292	129000	2.78712	129000	6.59176	129000	6.22882	129000	6.48193	129000	4.8212	129000	10.8678	129000	1.96623	129000	3.52703	129000	1.80827	129000	2.85073
129100	2.6364	129100	2.35838	129100	2.27089	129100	3.45812	129100	7.24616	129100	2.30417	129100	2.86936	129100	6.74696	129100	6.16373	129100	6.37336	129100	4.74566	129100	10.7527	129100	1.97326	129100	3.4991	129100	1.86601	129100	2.80478
129200	2.65685	129200	2.31635	129200	2.31532	129200	3.36596	129200	7.24588	129200	2.31321	129200	2.82126	129200	6.60603	129200	6.01894	129200	6.28105	129200	4.74617	129200	10.5728	129200	2.04238	129200	3.49622	129200	1.92975	129200	2.91148
129300	2.75962	129300	2.39758	129300	2.22801	129300	3.39574	129300	7.26906	129300	2.32878	129300	2.80158	129300	6.48526	129300	6.09602	129300	6.16737	129300	4.66871	129300	10.4947	129300	2.06406	129300	3.48857	129300	1.91471	129300	2.89683
129400	2.73465	129400	2.39787	129400	2.21957	129400	3.44212	129400	7.41652	129400	2.35623	129400	2.84904	129400	6.54852	129400	6.02664	129400	6.227	129400	4.6591	129400	10.4324	129400	2.00026	129400	3.50325	129400	1.95637	129400	2.82492
129500	2.75392	129500	2.33383	129500	2.28236	129500	3.49247	129500	7.41599	129500	2.3442	129500	2.82581	129500	6.68268	129500	6.12999	129500	6.22561	129500	4.68727	129500	10.3414	129500	1.96125	129500	3.41388	129500	1.94079	129500	2.92374
129600	2.72657	129600	2.31442	129600	2.20436	129600	3.45129	129600	7.63816	129600	2.32673	129600	2.87724	129600	6.52592	129600	6.18254	129600	6.32642	129600	4.67634	129600	10.1777	129600	2.01504	129600	3.47839	129600	1.92306	129600	2.90381
129700	2.68788	129700	2.32646	129700	2.29727	129700	3.37663	129700	7.58558	129700	2.36482	129700	2.92564	129700	6.66209	129700	6.22345	129700	6.44813	129700	4.72324	129700	10.181	129700	2.10977	129700	3.5043	129700	1.94629	129700	2.93052
129800	2.62378	129800	2.26212	129800	2.30311	129800	3.35277	129800	7.77697	129800	2.23018	129800	2.94392	129800	6.64399	129800	6.17204	129800	6.51532	129800	4.72302	129800	10.1718	129800	2.09241	129800	3.58942	129800	1.87974	129800	2.7907
129900	2.6396	129900	2.31921	129900	2.378	129900	3.37513	129900	7.72302	129900	2.21529	129900	2.83409	129900	6.73488	129900	6.15281	129900	6.52022	129900	4.71941	129900	10.0691	129900	2.09092	129900	3.54576	129900	1.91169	129900	2.87365
130000	2.62846	130000	2.24148	130000	2.29893	130000	3.49914	130000	7.73377	130000	2.2479	130000	2.77989	130000	6.73461	130000	6.10678	130000	6.62903	130000	4.7172	130000	10.0289	130000	2.07424	130000	3.44811	130000	1.85594	130000	2.87867
130100	2.67787	130100	2.21892	130100	2.3162	130100	3.50546	130100	7.80926	130100	2.24469	130100	2.79198	130100	6.88498	130100	6.02829	130100	6.72617	130100	4.82358	130100	9.9578	130100	2.02911	130100	3.45202	130100	1.85563	130100	2.76988
130200	2.65935	130200	2.13938	130200	2.31039	130200	3.54655	130200	7.86455	130200	2.25943	130200	2.74714	130200	6.8712	130200	6.22436	130200	6.84042	130200	4.75388	130200	9.83711	130200	2.04439	130200	3.40357	130200	1.87778	130200	2.73523
130300	2.67379	130300	2.20446	130300	2.37296	130300	3.57061	130300	7.81565	130300	2.30011	130300	2.75291	130300	7.01646	130300	6.18854	130300	6.87072	130300	4.73805	130300	9.79146	130300	2.07566	130300	3.4381	130300	1.86769	130300	2.55395
130400	2.69117	130400	2.16555	130400	2.38372	130400	3.55162	130400	7.79415	130400	2.31987	130400	2.79284	130400	6.93414	130400	6.31333	130400	6.94397	130400	4.73832	130400	9.87028	130400	2.10411	130400	3.45724	130400	1.89992	130400	2.5622
130500	2.6837	130500	2.24814	130500	2.40818	130500	3.53291	130500	7.91135	130500	2.24921	130500	2.79027	130500	6.94731	130500	6.28531	130500	6.79659	130500	4.64415	130500	9.83616	130500	2.09723	130500	3.47962	130500	1.92029	130500	2.55155
130600	2.70244	130600	2.23701	130600	2.42106	130600	3.61848	130600	7.86385	130600	2.30139	130600	2.72905	130600	6.97936	130600	6.29413	130600	6.66751	130600	4.62444	130600	9.72654	130600	2.10711	130600	3.51916	130600	1.96186	130600	2.54207
130700	2.6507	130700	2.24278	130700	2.41826	130700	3.48803	130700	7.82132	130700	2.34989	130700	2.77236	130700	7.09107	130700	6.21115	130700	6.60507	130700	4.71269	130700	9.75654	130700	2.05101	130700	3.46001	130700	1.93448	130700	2.48729
130800	2.60173	130800	2.24224	130800	2.34739	130800	3.46136	130800	7.77822	130800	2.27715	130800	2.78591	130800	7.10531	130800	6.41888	130800	6.6178	130800	4.75442	130800	9.6111	130800	2.06126	130800	3.50491	130800	1.97524	130800	2.55529
130900	2.64691	130900	2.17428	130900	2.31385	130900	3.49044	130900	7.60565	130900	2.31034	130900	2.78539	130900	7.07956	130900	6.37108	130900	6.80512	130900	4.82463	130900	9.50637	130900	2.07026	130900	3.4461	130900	2.03689	130900	2.46735
131000	2.6328	131000	2.2119	131000	2.3176	131000	3.57561	131000	7.56348	131000	2.29341	131000	2.73644	131000	6.95258	131000	6.41435	131000	6.75387	131000	4.84755	131000	9.59715	131000	2.09081	131000	3.49209	131000	1.9681	131000	2.51408
131100	2.68112	131100	2.15648	131100	2.30485	131100	3.59673	131100	7.59897	131100	2.25348	131100	2.74972	131100	6.87219	131100	6.45749	131100	6.67195	131100	4.80396	131100	9.59418	131100	2.1176	131100	3.59668	131100	2.0149	131100	2.51602
131200	2.69115	131200	2.15583	131200	2.31872	131200	3.49952	131200	7.69146	131200	2.27958	131200	2.74198	131200	6.71616	131200	6.63212	131200	6.75722	131200	4.80214	131200	9.60943	131200	2.06865	131200	3.53984	131200	1.95734	131200	2.49102
131300	2.58251	131300	2.19634	131300	2.30121	131300	3.53751	131300	7.7611	131300	2.2376	131300	2.69888	131300	6.77416	131300	6.74358	131300	6.69187	131300	4.76577	131300	9.73765	131300	2.06028	131300	3.51218	131300	1.94542	131300	2.4969
131400	2.59847	131400	2.19959	131400	2.29751	131400	3.57776	131400	7.65849	131400	2.24532	131400	2.68623	131400	6.92995	131400	6.79615	131400	6.74676	131400	4.81532	131400	9.69922	131400	2.09523	131400	3.55413	131400	1.93481	131400	2.46394
131500	2.59474	131500	2.20442	131500	2.30119	131500	3.51815	131500	7.71852	131500	2.2229	131500	2.67551	131500	6.90503	131500	6.78521	131500	6.70095	131500	4.83743	131500	9.68801	131500	2.05306	131500	3.65597	131500	2.031	131500	2.53816
131600	2.60352	131600	2.22914	131600	2.24614	131600	3.45402	131600	7.81804	131600	2.24113	131600	2.72938	131600	6.87619	131600	6.75376	131600	6.89173	131600	4.96906	131600	9.58157	131600	2.05679	131600	3.66885	131600	2.01049	131600	2.50756
131700	2.55559	131700	2.16812	131700	2.20179	131700	3.39178	131700	7.97252	131700	2.31557	131700	2.72865	131700	6.74464	131700	6.75564	131700	6.89694	131700	4.87006	131700	9.45262	131700	2.08126	131700	3.6695	131700	1.99202	131700	2.48964
131800	2.58576	131800	2.20918	131800	2.2322	131800	3.3606	131800	7.96201	131800	2.29649	131800	2.78843	131800	6.67968	131800	6.58256	131800	6.80072	131800	4.81807	131800	9.47608	131800	2.08687	131800	3.62859	131800	1.96873	131800	2.46355
131900	2.58659	131900	2.29486	131900	2.24209	131900	3.37758	131900	8.03239	131900	2.26877	131900	2.76232	131900	6.86915	131900	6.59437	131900	6.84204	131900	4.68883	131900	9.50819	131900	2.12165	131900	3.70272	131900	1.94604	131900	2.45508
132000	2.60974	132000	2.32562	132000	2.2461	132000	3.44023	132000	7.84621	132000	2.22375	132000	2.76966	132000	6.78241	132000	6.5859	132000	6.83384	132000	4.6096	132000	9.6268	132000	2.05034	132000	3.67998	132000	1.97879	132000	2.50845
132100	2.63494	132100	2.31501	132100	2.21566	132100	3.44405	132100	7.97941	132100	2.22807	132100	2.78015	132100	6.80686	132100	6.57282	132100	6.68056	132100	4.64328	132100	9.74062	132100	2.0781	132100	3.62763	132100	1.96111	132100	2.52472
132200	2.51992	132200	2.34911	132200	2.28673	132200	3.47608	132200	7.72219	132200	2.2193	132200	2.79349	132200	6.9581	132200	6.58276	132200	6.51591	132200	4.71085	132200	9.82971	132200	2.09959	132200	3.53372	132200	1.91942	132200	2.53349
132300	2.55522	132300	2.36171	132300	2.25434	132300	3.45595	132300	7.81801	132300	2.28207	132300	2.78837	132300	6.8803	132300	6.56417	132300	6.50731	132300	4.55334	132300	9.84196	132300	2.11495	132300	3.59975	132300	1.93661	132300	2.5609
132400	2.56302	132400	2.3837	132400	2.24075	132400	3.51127	132400	7.84497	132400	2.38153	132400	2.84816	132400	6.86888	132400	6.54253	132400	6.67977	132400	4.58672	132400	9.80053	132400	2.08481	132400	3.60997	132400	1.97747	132400	2.62505
132500	2.58534	132500	2.35809	132500	2.26873	132500	3.55596	132500	7.92715	132500	2.42094	132500	2.76398	132500	7.03695	132500	6.58192	132500	6.66953	132500	4.61695	132500	9.77671	132500	2.11461	132500	3.51907	132500	1.98443	132500	2.59842
132600	2.51796	132600	2.3592	132600	2.28805	132600	3.52728	132600	7.85416	132600	2.42687	132600	2.74508	132600	7.03024	132600	6.52201	132600	6.58583	132600	4.56596	132600	9.8684	132600	2.05989	132600	3.56039	132600	1.98921	132600	2.53233
132700	2.49867	132700	2.4264	132700	2.25521	132700	3.43942	132700	7.81399	132700	2.41099	132700	2.74717	132700	7.03931	132700	6.48847	132700	6.53419	132700	4.63826	132700	9.90957	132700	2.02551	132700	3.5435	132700	1.97435	132700	2.53066
132800	2.56231	132800	2.39572	132800	2.26363	132800	3.42374	132800	7.63442	132800	2.39947	132800	2.81095	132800	7.1254	132800	6.62288	132800	6.44306	132800	4.60313	132800	9.85257	132800	2.02047	132800	3.5647	132800	1.97033	132800	2.53886
132900	2.49981	132900	2.40233	132900	2.24486	132900	3.41246	132900	7.60537	132900	2.51087	132900	2.7753	132900	7.11252	132900	6.43432	132900	6.42256	132900	4.50148	132900	9.81868	132900	2.02025	132900	3.52876	132900	1.89594	132900	2.71754
133000	2.56792	133000	2.3889	133000	2.15745	133000	3.39764	133000	7.52818	133000	2.4263	133000	2.71879	133000	7.21757	133000	6.44817	133000	6.4232	133000	4.51689	133000	9.89191	133000	1.99856	133000	3.50706	133000	1.9469	133000	2.58629
133100	2.57085	133100	2.36764	133100	2.2049	133100	3.54247	133100	7.63085	133100	2.42532	133100	2.68507	133100	7.26597	133100	6.64999	133100	6.33185	133100	4.5441	133100	9.73995	133100	2.0315	133100	3.49373	133100	1.9476	133100	2.55302
133200	2.5421	133200	2.38181	133200	2.13734	133200	3.58273	133200	7.79065	133200	2.44906	133200	2.70354	133200	7.24023	133200	6.90995	133200	6.33631	133200	4.56372	133200	9.91287	133200	2.03792	133200	3.44434	133200	1.9643	133200	2.55512
133300	2.50956	133300	2.42391	133300	2.21632	133300	3.54679	133300	7.68913	133300	2.4088	133300	2.77051	133300	7.06341	133300	6.91553	133300	6.33595	133300	4.56715	133300	9.94282	133300	2.0245	133300	3.45375	133300	1.91624	133300	2.56113
133400	2.47737	133400	2.46096	133400	2.22507	133400	3.49438	133400	7.67688	133400	2.32021	133400	2.8502	133400	6.95945	133400	6.88564	133400	6.44107	133400	4.57247	133400	9.95589	133400	1.98243	133400	3.40604	133400	1.85987	133400	2.6739
133500	2.53204	133500	2.48851	133500	2.25018	133500	3.49984	133500	7.55373	133500	2.36637	133500	2.87708	133500	6.85527	133500	6.74194	133500	6.38214	133500	4.55015	133500	10.0173	133500	2.04911	133500	3.38937	133500	1.94215	133500	2.62172
133600	2.50196	133600	2.48912	133600	2.22623	133600	3.5408	133600	7.54252	133600	2.39468	133600	2.87505	133600	6.81722	133600	6.7394	133600	6.35203	133600	4.52025	133600	10.0941	133600	1.99716	133600	3.34141	133600	1.91428	133600	2.59984
133700	2.55495	133700	2.52496	133700	2.21962	133700	3.58193	133700	7.38597	133700	2.2727	133700	2.90356	133700	6.8052	133700	6.64266	133700	6.39112	133700	4.63996	133700	10.1727	133700	1.98002	133700	3.34052	133700	1.88673	133700	2.64128
133800	2.55456	133800	2.49594	133800	2.2768	133800	3.5699	133800	7.07589	133800	2.31706	133800	2.86203	133800	6.90008	133800	6.64912	133800	6.39518	133800	4.60748	133800	10.2352	133800	1.99482	133800	3.34446	133800	1.91226	133800	2.65799
133900	2.58093	133900	2.50146	133900	2.21325	133900	3.52226	133900	7.01014	133900	2.37508	133900	2.86067	133900	6.91776	133900	6.59281	133900	6.36758	133900	4.61137	133900	10.1501	133900	1.96876	133900	3.37955	133900	1.93617	133900	2.49484
134000	2.6081	134000	2.52074	134000	2.24553	134000	3.50027	134000	6.8676	134000	2.40814	134000	2.79678	134000	7.06241	134000	6.49483	134000	6.50033	134000	4.58906	134000	10.1242	134000	1.98789	134000	3.37072	134000	1.90471	134000	2.56826
134100	2.616	134100	2.49817	134100	2.25606	134100	3.53008	134100	6.95965	134100	2.43781	134100	2.80459	134100	6.89829	134100	6.56586	134100	6.50177	134100	4.69315	134100	10.2239	134100	2.00356	134100	3.38547	134100	1.94633	134100	2.59688
134200	2.57399	134200	2.55047	134200	2.22102	134200	3.44735	134200	7.03261	134200	2.48541	134200	2.8089	134200	6.8497	134200	6.53639	134200	6.48384	134200	4.65985	134200	10.0043	134200	1.9905	134200	3.34284	134200	1.9148	134200	2.59106
134300	2.59272	134300	2.45326	134300	2.27629	134300	3.36884	134300	7.21472	134300	2.48715	134300	2.73968	134300	6.71217	134300	6.47015	134300	6.48261	134300	4.58379	134300	9.99543	134300	2.02289	134300	3.36955	134300	1.9175	134300	2.517
134400	2.57959	134400	2.43689	134400	2.27454	134400	3.36337	134400	7.09392	134400	2.41672	134400	2.80998	134400	6.64618	134400	6.31339	134400	6.48269	134400	4.55025	134400	10.0469	134400	2.00862	134400	3.39554	134400	1.89445	134400	2.52809
134500	2.51512	134500	2.38093	134500	2.25456	134500	3.34648	134500	7.32235	134500	2.40167	134500	2.81744	134500	6.66722	134500	6.4203	134500	6.43385	134500	4.55338	134500	10.1267	134500	2.00732	134500	3.45285	134500	1.93122	134500	2.53528
134600	2.52046	134600	2.39528	134600	2.26233	134600	3.37461	134600	7.35566	134600	2.3464	134600	2.78161	134600	6.65668	134600	6.4031	134600	6.44198	134600	4.65834	134600	9.97235	134600	1.95139	134600	3.38652	134600	1.89591	134600	2.45669
134700	2.54139	134700	2.45377	134700	2.25328	134700	3.45726	134700	7.20473	134700	2.36517	134700	2.68397	134700	6.65178	134700	6.46915	134700	6.40384	134700	4.64013	134700	9.84079	134700	1.90953	134700	3.37399	134700	1.85947	134700	2.43658
134800	2.53473	134800	2.54433	134800	2.18407	134800	3.44691	134800	7.0773	134800	2.36601	134800	2.70995	134800	6.69888	134800	6.42743	134800	6.39198	134800	4.71279	134800	9.69761	134800	1.94626	134800	3.42801	134800	1.85239	134800	2.61562
134900	2.53216	134900	2.44709	134900	2.18358	134900	3.3843	134900	7.1736	134900	2.41154	134900	2.68019	134900	6.7367	134900	6.3336	134900	6.41783	134900	4.73319	134900	9.63918	134900	1.98806	134900	3.3721	134900	1.90831	134900	2.60217
135000	2.51036	135000	2.51764	135000	2.19085	135000	3.35318	135000	7.18134	135000	2.49423	135000	2.75147	135000	6.73621	135000	6.39093	135000	6.30391	135000	4.70494	135000	9.63434	135000	1.94827	135000	3.38631	135000	1.91522	135000	2.54342
135100	2.4974	135100	2.50825	135100	2.18045	135100	3.3055	135100	7.27626	135100	2.49035	135100	2.68492	135100	6.68709	135100	6.40412	135100	6.40335	135100	4.66887	135100	9.83673	135100	1.97109	135100	3.36006	135100	1.89033	135100	2.55776
135200	2.44054	135200	2.48618	135200	2.18671	135200	3.3151	135200	7.20916	135200	2.47116	135200	2.69519	135200	6.58918	135200	6.34749	135200	6.50185	135200	4.65073	135200	9.99121	135200	2.01384	135200	3.40387	135200	1.88192	135200	2.65194
135300	2.4447	135300	2.48033	135300	2.15122	135300	3.30035	135300	7.24037	135300	2.41959	135300	2.73803	135300	6.48132	135300	6.25854	135300	6.43017	135300	4.65561	135300	10.0418	135300	2.04327	135300	3.41063	135300	1.93557	135300	2.59606
135400	2.41834	135400	2.53582	135400	2.14673	135400	3.3244	135400	7.41304	135400	2.36405	135400	2.70601	135400	6.48238	135400	6.31927	135400	6.47657	135400	4.54731	135400	10.2134	135400	2.05928	135400	3.41446	135400	2.00988	135400	2.50813
135500	2.42584	135500	2.48166	135500	2.12908	135500	3.27466	135500	7.53715	135500	2.38574	135500	2.7285	135500	6.52942	135500	6.39897	135500	6.68047	135500	4.6127	135500	10.1914	135500	2.07175	135500	3.3996	135500	1.94731	135500	2.59299
135600	2.35785	135600	2.42128	135600	2.19697	135600	3.32045	135600	7.63602	135600	2.37104	135600	2.76514	135600	6.37399	135600	6.30695	135600	6.64807	135600	4.53892	135600	10.227	135600	2.08642	135600	3.35951	135600	1.95655	135600	2.66602
135700	2.38681	135700	2.54719	135700	2.17239	135700	3.34911	135700	7.48705	135700	2.37765	135700	2.73019	135700	6.21535	135700	6.22266	135700	6.55642	135700	4.54434	135700	10.1805	135700	2.03652	135700	3.40178	135700	1.90811	135700	2.64753
135800	2.47058	135800	2.59773	135800	2.20298	135800	3.39355	135800	7.41558	135800	2.36418	135800	2.66832	135800	6.26999	135800	6.13869	135800	6.42571	135800	4.58032	135800	10.3787	135800	2.07659	135800	3.41079	135800	1.97477	135800	2.67398
135900	2.5172	135900	2.5022	135900	2.15018	135900	3.342	135900	7.36498	135900	2.34209	135900	2.64367	135900	6.24834	135900	6.18891	135900	6.36691	135900	4.6368	135900	10.3108	135900	2.03523	135900	3.40577	135900	1.93569	135900	2.69887
136000	2.47926	136000	2.52381	136000	2.1794	136000	3.27365	136000	7.36356	136000	2.32697	136000	2.68918	136000	6.02459	136000	6.10578	136000	6.30843	136000	4.61637	136000	10.3338	136000	2.03498	136000	3.37919	136000	1.92824	136000	2.66198
136100	2.52736	136100	2.47703	136100	2.13419	136100	3.22954	136100	7.32582	136100	2.42405	136100	2.70086	136100	6.04807	136100	6.11592	136100	6.23181	136100	4.62689	136100	10.3604	136100	2.02993	136100	3.38039	136100	1.86724	136100	2.60994
136200	2.52169	136200	2.48665	136200	2.17827	136200	3.19082	136200	7.28817	136200	2.35547	136200	2.67015	136200	6.30611	136200	6.22419	136200	6.26051	136200	4.68418	136200	10.5141	136200	2.00542	136200	3.38186	136200	1.83742	136200	2.70651
136300	2.52341	136300	2.43458	136300	2.19444	136300	3.25617	136300	7.14176	136300	2.43983	136300	2.66174	136300	6.41416	136300	6.26895	136300	6.21179	136300	4.68422	136300	10.44	136300	1.97729	136300	3.38869	136300	1.85077	136300	2.77819
136400	2.60658	136400	2.37935	136400	2.2709	136400	3.20424	136400	7.12524	136400	2.41096	136400	2.61405	136400	6.26437	136400	6.35131	136400	6.27971	136400	4.64614	136400	10.6477	136400	2.03383	136400	3.33232	136400	1.84552	136400	2.63759
136500	2.60645	136500	2.42621	136500	2.25518	136500	3.41087	136500	7.29642	136500	2.50198	136500	2.61172	136500	6.38231	136500	6.39398	136500	6.25073	136500	4.68232	136500	10.6181	136500	2.02691	136500	3.33837	136500	1.80473	136500	2.70691
136600	2.5831	136600	2.45522	136600	2.3087	136600	3.30041	136600	7.34439	136600	2.43707	136600	2.5866	136600	6.32351	136600	6.40254	136600	6.30857	136600	4.65315	136600	10.6151	136600	2.05005	136600	3.38291	136600	1.81655	136600	2.62779
136700	2.54448	136700	2.42331	136700	2.33786	136700	3.27252	136700	7.51394	136700	2.4266	136700	2.58015	136700	6.60847	136700	5.99994	136700	6.29268	136700	4.59063	136700	10.7234	136700	2.08926	136700	3.43946	136700	1.88822	136700	2.66763
136800	2.52459	136800	2.43615	136800	2.3168	136800	3.24527	136800	7.50015	136800	2.47143	136800	2.65066	136800	6.57013	136800	5.8564	136800	6.4125	136800	4.62128	136800	10.9046	136800	2.03631	136800	3.39648	136800	1.87362	136800	2.70543
136900	2.57547	136900	2.49604	136900	2.27548	136900	3.23164	136900	7.48611	136900	2.45629	136900	2.67747	136900	6.53712	136900	5.88112	136900	6.3462	136900	4.59763	136900	10.8925	136900	2.01147	136900	3.37787	136900	1.83299	136900	2.67208
137000	2.59572	137000	2.43132	137000	2.32765	137000	3.29851	137000	7.72827	137000	2.39288	137000	2.67765	137000	6.46411	137000	5.78538	137000	6.38874	137000	4.60185	137000	10.8519	137000	2.05919	137000	3.32396	137000	1.81015	137000	2.68353
137100	2.56912	137100	2.44679	137100	2.28233	137100	3.29731	137100	7.84129	137100	2.34579	137100	2.68987	137100	6.41968	137100	5.77071	137100	6.54499	137100	4.46473	137100	10.8707	137100	2.0903	137100	3.35401	137100	1.93237	137100	2.72575
137200	2.66906	137200	2.37378	137200	2.35962	137200	3.40626	137200	7.83737	137200	2.33339	137200	2.67046	137200	6.5601	137200	5.70323	137200	6.68067	137200	4.46818	137200	10.7332	137200	2.07103	137200	3.39408	137200	1.8966	137200	2.77898
137300	2.5833	137300	2.46419	137300	2.28934	137300	3.34499	137300	7.79149	137300	2.29451	137300	2.69234	137300	6.72372	137300	5.76542	137300	6.65719	137300	4.46564	137300	10.904	137300	2.02723	137300	3.38749	137300	1.95796	137300	2.66343
137400	2.51539	137400	2.45355	137400	2.23718	137400	3.42488	137400	7.81495	137400	2.24054	137400	2.79301	137400	6.71591	137400	5.8665	137400	6.59747	137400	4.56104	137400	10.8706	137400	2.05663	137400	3.45437	137400	1.92011	137400	2.77704
137500	2.53944	137500	2.44352	137500	2.24494	137500	3.35865	137500	7.91937	137500	2.32604	137500	2.74607	137500	6.76935	137500	5.83464	137500	6.60353	137500	4.54006	137500	10.8764	137500	2.04222	137500	3.45615	137500	1.9097	137500	2.70922
137600	2.61943	137600	2.43737	137600	2.19888	137600	3.27661	137600	7.87039	137600	2.40113	137600	2.81209	137600	6.74891	137600	5.69388	137600	6.66598	137600	4.51452	137600	10.9415	137600	2.00926	137600	3.42956	137600	1.9536	137600	2.77351
137700	2.5496	137700	2.43337	137700	2.29553	137700	3.29852	137700	7.87554	137700	2.4173	137700	2.77038	137700	6.60782	137700	5.66093	137700	6.80709	137700	4.55815	137700	11.0014	137700	2.10306	137700	3.46711	137700	1.96266	137700	2.67754
137800	2.53008	137800	2.43273	137800	2.35643	137800	3.29311	137800	8.09074	137800	2.43605	137800	2.79514	137800	6.43015	137800	5.52772	137800	6.77725	137800	4.58804	137800	11.0245	137800	2.08892	137800	3.45808	137800	1.91751	137800	2.64126
137900	2.59121	137900	2.35555	137900	2.32219	137900	3.33275	137900	8.20082	137900	2.3694	137900	2.7801	137900	6.49106	137900	5.69583	137900	6.76476	137900	4.53781	137900	10.9374	137900	2.12479	137900	3.50162	137900	1.92124	137900	2.739
138000	2.54244	138000	2.38374	138000	2.31243	138000	3.34491	138000	8.27294	138000	2.33651	138000	2.76501	138000	6.40794	138000	5.74468	138000	6.71795	138000	4.63722	138000	10.8567	138000	2.05972	138000	3.51826	138000	1.92275	138000	2.76673
138100	2.54079	138100	2.4627	138100	2.38073	138100	3.39989	138100	8.30851	138100	2.37751	138100	2.76051	138100	6.41777	138100	5.96625	138100	6.74671	138100	4.66115	138100	10.5984	138100	2.10563	138100	3.47892	138100	1.91462	138100	2.74547
138200	2.57574	138200	2.42687	138200	2.38958	138200	3.35693	138200	8.35787	138200	2.25354	138200	2.78498	138200	6.46677	138200	5.79853	138200	6.63579	138200	4.58425	138200	10.496	138200	2.06373	138200	3.47504	138200	1.91511	138200	2.73192
138300	2.59268	138300	2.38446	138300	2.40271	138300	3.39479	138300	8.47717	138300	2.28304	138300	2.76016	138300	6.40008	138300	5.59656	138300	6.60344	138300	4.54913	138300	10.3475	138300	2.00467	138300	3.44476	138300	1.92772	138300	2.71849
138400	2.5923	138400	2.32388	138400	2.4055	138400	3.3112	138400	8.21288	138400	2.33461	138400	2.7463	138400	6.37553	138400	5.46686	138400	6.84775	138400	4.51217	138400	10.2749	138400	2.0232	138400	3.45106	138400	1.9442	138400	2.63582
138500	2.58468	138500	2.33437	138500	2.42913	138500	3.30629	138500	8.26832	138500	2.38605	138500	2.81269	138500	6.20917	138500	5.56704	138500	6.8158	138500	4.4949	138500	10.2394	138500	1.97051	138500	3.36439	138500	1.8866	138500	2.58725
138600	2.62457	138600	2.39135	138600	2.40269	138600	3.35427	138600	8.21989	138600	2.40433	138600	2.80674	138600	6.24767	138600	5.5296	138600	6.71995	138600	4.41991	138600	10.1298	138600	1.99658	138600	3.36086	138600	1.96717	138600	2.7417
138700	2.61995	138700	2.46714	138700	2.38345	138700	3.22256	138700	8.59519	138700	2.39872	138700	2.79246	138700	6.46726	138700	5.44344	138700	6.77638	138700	4.45623	138700	10.1773	138700	2.00098	138700	3.44675	138700	1.91141	138700	2.72894
138800	2.63785	138800	2.45801	138800	2.44353	138800	3.25913	138800	8.78874	138800	2.33835	138800	2.77979	138800	6.37572	138800	5.52878	138800	6.78534	138800	4.47613	138800	10.3706	138800	1.9873	138800	3.46558	138800	1.95247	138800	2.79311
138900	2.59617	138900	2.50784	138900	2.36053	138900	3.22369	138900	8.83014	138900	2.30728	138900	2.71398	138900	6.22162	138900	5.40292	138900	6.75383	138900	4.47242	138900	10.4697	138900	2.0176	138900	3.51622	138900	2.00402	138900	2.8149
139000	2.59338	139000	2.44474	139000	2.32962	139000	3.33075	139000	8.78813	139000	2.4209	139000	2.79265	139000	6.28293	139000	5.40213	139000	6.71458	139000	4.54379	139000	10.513	139000	2.03499	139000	3.50845	139000	1.99152	139000	2.77578
139100	2.52558	139100	2.49939	139100	2.40526	139100	3.27099	139100	8.66729	139100	2.36223	139100	2.73563	139100	6.23441	139100	5.33434	139100	6.77701	139100	4.54564	139100	10.6665	139100	2.0623	139100	3.60872	139100	1.94995	139100	2.72419
139200	2.52996	139200	2.38417	139200	2.38088	139200	3.18508	139200	8.83775	139200	2.36858	139200	2.85244	139200	6.14904	139200	5.55535	139200	6.70637	139200	4.53468	139200	10.6663	139200	2.01413	139200	3.54638	139200	1.96533	139200	2.69933
139300	2.62696	139300	2.34707	139300	2.45052	139300	3.30332	139300	8.77861	139300	2.37081	139300	2.91348	139300	6.12911	139300	5.61165	139300	6.56251	139300	4.55859	139300	10.6666	139300	1.95619	139300	3.52475	139300	1.95242	139300	2.72813
139400	2.55534	139400	2.29169	139400	2.35527	139400	3.27955	139400	8.68239	139400	2.40326	139400	2.98532	139400	6.0991	139400	5.61829	139400	6.30654	139400	4.599	139400	10.5333	139400	1.97579	139400	3.60206	139400	1.95349	139400	2.68123
139500	2.51184	139500	2.39547	139500	2.40208	139500	3.26901	139500	8.853	139500	2.36986	139500	2.86294	139500	6.16955	139500	5.47725	139500	6.34862	139500	4.59468	139500	10.5608	139500	1.9874	139500	3.57139	139500	1.96802	139500	2.61856
139600	2.54973	139600	2.31646	139600	2.36189	139600	3.33576	139600	8.83027	139600	2.31285	139600	2.86351	139600	6.09899	139600	5.3141	139600	6.23972	139600	4.58456	139600	10.66	139600	2.03514	139600	3.52704	139600	1.92988	139600	2.59456
139700	2.54891	139700	2.35963	139700	2.33767	139700	3.39962	139700	9.07652	139700	2.34087	139700	2.75385	139700	6.0685	139700	5.38909	139700	6.33474	139700	4.52692	139700	10.65	139700	2.0082	139700	3.57331	139700	1.88942	139700	2.56132
139800	2.50837	139800	2.3022	139800	2.30286	139800	3.3255	139800	9.01963	139800	2.3682	139800	2.85647	139800	6.02181	139800	5.39539	139800	6.47089	139800	4.48531	139800	10.5352	139800	2.02969	139800	3.55316	139800	1.92367	139800	2.67333
139900	2.50602	139900	2.2993	139900	2.30966	139900	3.3986	139900	9.0293	139900	2.42524	139900	2.8131	139900	5.90793	139900	5.26891	139900	6.55648	139900	4.53663	139900	10.377	139900	1.96991	139900	3.53468	139900	1.89251	139900	2.60334
140000	2.581	140000	2.39069	140000	2.30737	140000	3.35956	140000	9.22137	140000	2.39954	140000	2.9061	140000	6.05545	140000	5.36761	140000	6.50224	140000	4.57673	140000	10.2725	140000	1.91815	140000	3.53925	140000	1.89611	140000	2.72889
140100	2.64028	140100	2.4398	140100	2.34485	140100	3.37096	140100	9.2104	140100	2.36244	140100	2.89947	140100	6.0594	140100	5.50474	140100	6.47599	140100	4.54899	140100	10.3296	140100	1.95092	140100	3.58569	140100	1.81869	140100	2.72397
140200	2.63838	140200	2.35673	140200	2.3259	140200	3.31768	140200	9.26322	140200	2.33953	140200	2.98009	140200	6.08708	140200	5.62118	140200	6.41124	140200	4.53982	140200	10.5159	140200	1.97207	140200	3.54928	140200	1.88023	140200	2.71802
140300	2.48373	140300	2.33249	140300	2.34365	140300	3.31368	140300	9.25073	140300	2.33469	140300	2.94194	140300	5.967	140300	5.635	140300	6.49215	140300	4.54	140300	10.4458	140300	2.01491	140300	3.54942	140300	1.89222	140300	2.76187
140400	2.50479	140400	2.38643	140400	2.30537	140400	3.35478	140400	9.2093	140400	2.29352	140400	2.87652	140400	5.83987	140400	5.79196	140400	6.6131	140400	4.49962	140400	10.5604	140400	1.96791	140400	3.4466	140400	1.94759	140400	2.71418
140500	2.42634	140500	2.34267	140500	2.26252	140500	3.43502	140500	9.07599	140500	2.36037	140500	2.95919	140500	5.86349	140500	5.73874	140500	6.51567	140500	4.55986	140500	10.6311	140500	1.92454	140500	3.46276	140500	1.92118	140500	2.77036
140600	2.47509	140600	2.31111	140600	2.30221	140600	3.37049	140600	9.15125	140600	2.32179	140600	2.92015	140600	6.01303	140600	5.67612	140600	6.69004	140600	4.64354	140600	10.5571	140600	1.93747	140600	3.42152	140600	1.86569	140600	2.69723
140700	2.50961	140700	2.36915	140700	2.24848	140700	3.40102	140700	9.07534	140700	2.37189	140700	2.90305	140700	6.20745	140700	5.61141	140700	6.55196	140700	4.63132	140700	10.2153	140700	1.93999	140700	3.42727	140700	1.9123	140700	2.65488
140800	2.50737	140800	2.39101	140800	2.20239	140800	3.39748	140800	9.36663	140800	2.42363	140800	2.76906	140800	6.29251	140800	5.62848	140800	6.29941	140800	4.60684	140800	10.3902	140800	1.92852	140800	3.47481	140800	1.91849	140800	2.68545
140900	2.47571	140900	2.31248	140900	2.19961	140900	3.42896	140900	9.54135	140900	2.37144	140900	2.84134	140900	6.27331	140900	5.57728	140900	6.26059	140900	4.55564	140900	10.368	140900	1.95411	140900	3.51202	140900	1.94891	140900	2.57568
141000	2.50704	141000	2.2683	141000	2.232	141000	3.45274	141000	9.50708	141000	2.35083	141000	2.74902	141000	6.38195	141000	5.56547	141000	6.2574	141000	4.5734	141000	10.4218	141000	1.97637	141000	3.52985	141000	1.98178	141000	2.70648
141100	2.61078	141100	2.25028	141100	2.20312	141100	3.47022	141100	9.22835	141100	2.33247	141100	2.77577	141100	6.40337	141100	5.59644	141100	6.29005	141100	4.58449	141100	10.2677	141100	1.91933	141100	3.57094	141100	1.92254	141100	2.64969
141200	2.5807	141200	2.2708	141200	2.22454	141200	3.35643	141200	9.3173	141200	2.28546	141200	2.80709	141200	6.41584	141200	5.61871	141200	6.19337	141200	4.5555	141200	10.3607	141200	1.98392	141200	3.55179	141200	1.98159	141200	2.69405
141300	2.6468	141300	2.299	141300	2.2594	141300	3.38241	141300	9.24588	141300	2.34576	141300	2.81239	141300	6.38685	141300	5.62671	141300	6.10466	141300	4.52083	141300	10.501	141300	2.00009	141300	3.57566	141300	2.01835	141300	2.74724
141400	2.66575	141400	2.29418	141400	2.20541	141400	3.39061	141400	9.30005	141400	2.33031	141400	2.76647	141400	6.36685	141400	5.73506	141400	5.98899	141400	4.54791	141400	10.5153	141400	1.97822	141400	3.60332	141400	1.9643	141400	2.70969
141500	2.68062	141500	2.29079	141500	2.24717	141500	3.35539	141500	9.13512	141500	2.32329	141500	2.80836	141500	6.27733	141500	5.61133	141500	6.01137	141500	4.50329	141500	10.6369	141500	2.00223	141500	3.56349	141500	1.97383	141500	2.65105
141600	2.71938	141600	2.22003	141600	2.28066	141600	3.29465	141600	8.98206	141600	2.30856	141600	2.85359	141600	6.27159	141600	5.51782	141600	5.98131	141600	4.52988	141600	10.7224	141600	1.97291	141600	3.56035	141600	1.91664	141600	2.7665
141700	2.78315	141700	2.30347	141700	2.25151	141700	3.29994	141700	8.97262	141700	2.26324	141700	2.78119	141700	6.306	141700	5.62925	141700	5.95425	141700	4.5133	141700	10.6186	141700	1.98449	141700	3.54644	141700	1.89804	141700	2.82718
141800	2.7595	141800	2.26878	141800	2.27753	141800	3.37618	141800	8.88527	141800	2.30856	141800	2.90739	141800	6.32565	141800	5.60553	141800	5.98069	141800	4.5992	141800	10.6757	141800	1.93793	141800	3.49604	141800	1.88874	141800	2.79476
141900	2.78936	141900	2.24297	141900	2.26815	141900	3.35039	141900	8.85451	141900	2.31359	141900	2.89377	141900	6.32918	141900	5.75429	141900	6.03247	141900	4.54443	141900	10.5776	141900	1.92337	141900	3.40691	141900	1.93816	141900	2.88648
142000	2.78095	142000	2.19804	142000	2.28002	142000	3.30837	142000	8.94893	142000	2.28315	142000	2.83367	142000	6.32694	142000	5.81726	142000	5.95269	142000	4.48872	142000	10.4683	142000	1.90763	142000	3.45613	142000	1.97449	142000	2.94466
142100	2.77867	142100	2.25685	142100	2.28923	142100	3.29822	142100	9.22904	142100	2.26454	142100	2.99433	142100	6.25613	142100	5.66831	142100	5.91168	142100	4.55985	142100	10.5602	142100	1.98408	142100	3.53306	142100	2.01916	142100	2.91441
142200	2.80972	142200	2.31442	142200	2.23176	142200	3.24307	142200	9.27675	142200	2.31328	142200	3.04219	142200	6.29803	142200	5.82623	142200	6.01073	142200	4.53668	142200	10.635	142200	1.93458	142200	3.53285	142200	2.03112	142200	2.91503
142300	2.79403	142300	2.33007	142300	2.29665	142300	3.23107	142300	9.10804	142300	2.35687	142300	3.00931	142300	6.30994	142300	5.83779	142300	5.94607	142300	4.55552	142300	10.6555	142300	1.93548	142300	3.51249	142300	1.96141	142300	2.84543
142400	2.77925	142400	2.33362	142400	2.31492	142400	3.22243	142400	9.29053	142400	2.31338	142400	3.01726	142400	6.4573	142400	5.88719	142400	5.91528	142400	4.56261	142400	10.628	142400	1.96401	142400	3.43451	142400	2.02528	142400	2.9161
142500	2.82968	142500	2.39001	142500	2.28268	142500	3.25854	142500	9.27145	142500	2.28511	142500	2.97857	142500	6.59945	142500	5.89019	142500	5.89308	142500	4.54349	142500	10.6774	142500	1.95326	142500	3.44023	142500	1.99644	142500	2.81953
142600	2.74475	142600	2.37557	142600	2.24415	142600	3.42789	142600	9.16552	142600	2.23779	142600	2.96366	142600	6.68121	142600	5.84518	142600	5.92973	142600	4.55686	142600	10.9114	142600	1.98066	142600	3.42229	142600	1.95096	142600	2.77924
142700	2.76696	142700	2.40634	142700	2.30534	142700	3.22144	142700	9.1298	142700	2.28338	142700	3.02472	142700	6.62614	142700	5.69607	142700	5.99321	142700	4.51418	142700	10.9644	142700	1.93056	142700	3.41444	142700	2.02255	142700	2.72352
142800	2.83821	142800	2.37935	142800	2.25884	142800	3.29002	142800	9.12826	142800	2.30539	142800	3.12566	142800	6.53809	142800	5.86272	142800	5.99097	142800	4.51768	142800	11.2629	142800	1.94056	142800	3.46589	142800	1.98794	142800	2.77072
142900	2.81182	142900	2.3421	142900	2.33082	142900	3.31523	142900	9.19467	142900	2.33181	142900	3.11514	142900	6.44105	142900	5.80237	142900	6.03866	142900	4.53149	142900	11.4479	142900	1.95545	142900	3.40972	142900	1.98449	142900	2.75552
143000	2.8665	143000	2.36723	143000	2.20719	143000	3.35025	143000	9.06921	143000	2.26491	143000	3.19597	143000	6.40628	143000	5.83201	143000	6.09306	143000	4.52111	143000	11.4621	143000	1.94239	143000	3.43848	143000	1.9439	143000	2.76628
143100	2.79281	143100	2.34666	143100	2.25262	143100	3.3477	143100	8.94663	143100	2.21669	143100	3.15433	143100	6.2938	143100	5.86398	143100	6.03006	143100	4.52855	143100	11.5517	143100	1.93163	143100	3.44283	143100	1.90963	143100	2.87832
143200	2.80949	143200	2.31047	143200	2.27982	143200	3.35611	143200	8.92172	143200	2.25494	143200	3.22251	143200	6.34174	143200	5.84666	143200	5.91637	143200	4.63045	143200	11.8372	143200	1.97033	143200	3.53879	143200	1.93515	143200	2.68831
143300	2.79585	143300	2.29013	143300	2.25905	143300	3.30341	143300	8.93338	143300	2.31066	143300	3.13717	143300	6.25175	143300	5.76029	143300	5.92586	143300	4.63646	143300	11.7554	143300	1.92713	143300	3.55703	143300	1.9441	143300	2.64819
143400	2.75102	143400	2.25105	143400	2.19774	143400	3.35883	143400	8.91651	143400	2.28254	143400	3.07863	143400	5.96769	143400	5.89037	143400	5.90249	143400	4.59038	143400	11.6641	143400	1.88329	143400	3.51001	143400	1.98028	143400	2.75964
143500	2.7877	143500	2.19993	143500	2.11573	143500	3.35496	143500	9.25529	143500	2.24157	143500	3.14666	143500	6.05869	143500	5.91672	143500	5.82472	143500	4.55315	143500	11.7146	143500	1.92107	143500	3.51753	143500	2.01035	143500	2.69551
143600	2.81847	143600	2.21372	143600	2.0441	143600	3.3258	143600	9.30666	143600	2.23533	143600	3.14639	143600	6.23747	143600	6.11907	143600	5.89711	143600	4.54341	143600	11.8356	143600	1.95005	143600	3.4567	143600	2.0089	143600	2.7266
143700	2.73509	143700	2.24114	143700	2.08813	143700	3.36935	143700	9.2046	143700	2.29492	143700	3.06687	143700	6.26993	143700	6.05499	143700	5.91358	143700	4.61009	143700	11.9412	143700	1.96969	143700	3.474	143700	2.00315	143700	2.79675
143800	2.77241	143800	2.30421	143800	2.09822	143800	3.40425	143800	9.22978	143800	2.23386	143800	3.09301	143800	6.41823	143800	6.10355	143800	5.86239	143800	4.6213	143800	11.8768	143800	1.94482	143800	3.36912	143800	1.9693	143800	2.77101
143900	2.83721	143900	2.23815	143900	2.15607	143900	3.31007	143900	9.2285	143900	2.31072	143900	3.25739	143900	6.41708	143900	6.06082	143900	5.93552	143900	4.56677	143900	11.8514	143900	1.99884	143900	3.44133	143900	1.97264	143900	2.74303
144000	2.81998	144000	2.3082	144000	2.09613	144000	3.25043	144000	9.20046	144000	2.26549	144000	3.29372	144000	6.44303	144000	6.02994	144000	5.82686	144000	4.55424	144000	11.6431	144000	1.98588	144000	3.53306	144000	1.9773	144000	2.75882
144100	2.78467	144100	2.27946	144100	2.0914	144100	3.29304	144100	9.33442	144100	2.28478	144100	3.31139	144100	6.4179	144100	5.85423	144100	5.78826	144100	4.52874	144100	11.8494	144100	1.92826	144100	3.58316	144100	1.94366	144100	2.82692
144200	2.81947	144200	2.2987	144200	2.1045	144200	3.30572	144200	9.28304	144200	2.25543	144200	3.3464	144200	6.52131	144200	5.83511	144200	5.74437	144200	4.52869	144200	11.7824	144200	1.9186	144200	3.55021	144200	1.91121	144200	2.77722
144300	2.87003	144300	2.2732	144300	2.13404	144300	3.32351	144300	9.10106	144300	2.22286	144300	3.3695	144300	6.6371	144300	5.93024	144300	5.82395	144300	4.53242	144300	11.8968	144300	1.82853	144300	3.48688	144300	1.96799	144300	2.75914
144400	2.8365	144400	2.24868	144400	2.14936	144400	3.35774	144400	9.22178	144400	2.18444	144400	3.23667	144400	6.79906	144400	5.86752	144400	5.92086	144400	4.4808	144400	11.812	144400	1.95371	144400	3.51976	144400	1.99671	144400	2.82006
144500	2.88662	144500	2.2279	144500	2.12035	144500	3.36714	144500	9.17288	144500	2.24837	144500	3.35825	144500	6.6217	144500	5.98038	144500	5.97782	144500	4.46329	144500	11.739	144500	1.95043	144500	3.5595	144500	1.97958	144500	2.92128
144600	2.74225	144600	2.254	144600	2.13304	144600	3.34085	144600	9.26854	144600	2.27329	144600	3.31228	144600	6.70046	144600	6.05708	144600	6.01208	144600	4.48454	144600	11.8967	144600	1.87559	144600	3.54356	144600	1.96155	144600	2.93331
144700	2.82328	144700	2.29719	144700	2.16978	144700	3.35831	144700	9.32608	144700	2.26933	144700	3.27693	144700	6.58991	144700	6.1231	144700	5.91722	144700	4.48571	144700	11.7719	144700	2.00885	144700	3.58483	144700	1.98183	144700	2.93242
144800	2.87548	144800	2.28664	144800	2.1091	144800	3.42815	144800	9.42493	144800	2.2356	144800	3.25429	144800	6.49067	144800	5.96496	144800	6.05974	144800	4.44441	144800	11.7609	144800	1.98781	144800	3.48289	144800	1.98158	144800	2.97209
144900	2.81109	144900	2.24392	144900	2.08099	144900	3.352	144900	9.42394	144900	2.31549	144900	3.38504	144900	6.53825	144900	5.91353	144900	6.01572	144900	4.52373	144900	11.6941	144900	1.98487	144900	3.50397	144900	1.94908	144900	2.86102
145000	2.82661	145000	2.25689	145000	2.10315	145000	3.32846	145000	9.40966	145000	2.31256	145000	3.43334	145000	6.57068	145000	6.06297	145000	5.92009	145000	4.55772	145000	11.818	145000	1.94454	145000	3.48052	145000	1.97234	145000	2.86919
145100	2.84457	145100	2.26842	145100	2.17544	145100	3.2626	145100	9.63009	145100	2.34516	145100	3.59028	145100	6.60518	145100	6.07938	145100	5.90945	145100	4.60124	145100	11.7397	145100	1.93674	145100	3.43863	145100	1.9917	145100	2.92285
145200	2.80444	145200	2.22047	145200	2.12889	145200	3.30626	145200	9.77554	145200	2.36257	145200	3.49573	145200	6.81894	145200	6.19121	145200	5.95973	145200	4.50249	145200	11.7166	145200	1.90545	145200	3.44392	145200	1.95475	145200	2.8388
145300	2.7653	145300	2.21686	145300	2.07797	145300	3.18869	145300	9.8347	145300	2.34541	145300	3.42117	145300	6.88981	145300	6.13041	145300	5.89972	145300	4.54652	145300	11.7153	145300	1.9315	145300	3.49791	145300	1.99049	145300	2.88385
145400	2.92304	145400	2.30884	145400	2.15559	145400	3.20728	145400	9.86762	145400	2.29124	145400	3.39866	145400	7.02059	145400	6.35365	145400	5.92223	145400	4.52036	145400	11.77	145400	1.89874	145400	3.52512	145400	2.01202	145400	2.90303
145500	2.88051	145500	2.28001	145500	2.18879	145500	3.2871	145500	9.84171	145500	2.28161	145500	3.2624	145500	7.16308	145500	6.22719	145500	6.08112	145500	4.52042	145500	11.661	145500	1.93464	145500	3.56741	145500	2.00629	145500	2.89415
145600	2.81278	145600	2.29759	145600	2.13179	145600	3.2714	145600	9.76195	145600	2.20552	145600	3.272	145600	7.08805	145600	6.22138	145600	5.88406	145600	4.49977	145600	11.7458	145600	1.91762	145600	3.39831	145600	2.02213	145600	2.78981
145700	2.81977	145700	2.27558	145700	2.1346	145700	3.34039	145700	9.71752	145700	2.29531	145700	3.33373	145700	7.10441	145700	6.1331	145700	5.96796	145700	4.49235	145700	11.8371	145700	1.90683	145700	3.47734	145700	1.99865	145700	2.85248
145800	2.78059	145800	2.24235	145800	2.12775	145800	3.31423	145800	9.82589	145800	2.27025	145800	3.28894	145800	7.25854	145800	5.99386	145800	6.02814	145800	4.50086	145800	11.7081	145800	1.91714	145800	3.46494	145800	2.00267	145800	2.74824
145900	2.75353	145900	2.24063	145900	2.19872	145900	3.23799	145900	9.78677	145900	2.29446	145900	3.29346	145900	7.34195	145900	5.98612	145900	6.02672	145900	4.50659	145900	11.704	145900	1.9207	145900	3.57067	145900	1.99929	145900	2.89955
146000	2.72565	146000	2.14955	146000	2.2328	146000	3.29266	146000	9.70823	146000	2.25871	146000	3.20138	146000	7.45348	146000	5.98992	146000	6.05562	146000	4.48035	146000	11.7204	146000	1.89701	146000	3.60958	146000	1.98662	146000	2.82391
146100	2.67946	146100	2.17691	146100	2.26913	146100	3.33744	146100	9.70913	146100	2.26552	146100	3.17335	146100	7.4862	146100	5.9874	146100	6.02867	146100	4.50534	146100	11.582	146100	1.85899	146100	3.52667	146100	1.97685	146100	2.74099
146200	2.62879	146200	2.19449	146200	2.30118	146200	3.4005	146200	9.63659	146200	2.25945	146200	3.19203	146200	7.27299	146200	5.75168	146200	6.08284	146200	4.50281	146200	11.6627	146200	1.86348	146200	3.52912	146200	1.98844	146200	2.65549
146300	2.57118	146300	2.26011	146300	2.29204	146300	3.24203	146300	9.61681	146300	2.31403	146300	3.18145	146300	7.22565	146300	5.85832	146300	6.07634	146300	4.47548	146300	11.6779	146300	1.89998	146300	3.60669	146300	1.98997	146300	2.74859
146400	2.59184	146400	2.22359	146400	2.31838	146400	3.22271	146400	9.623	146400	2.32672	146400	3.1447	146400	7.16652	146400	5.7454	146400	6.04544	146400	4.49586	146400	11.6734	146400	1.87555	146400	3.56182	146400	1.99522	146400	2.69418
146500	2.54956	146500	2.186	146500	2.29752	146500	3.2667	146500	9.58226	146500	2.30399	146500	3.16177	146500	7.04682	146500	5.77858	146500	6.04552	146500	4.46329	146500	11.6504	146500	1.88304	146500	3.58317	146500	2.02306	146500	2.70797
146600	2.66932	146600	2.17655	146600	2.35232	146600	3.38687	146600	9.45668	146600	2.30303	146600	3.2327	146600	7.12742	146600	5.85174	146600	5.92962	146600	4.45783	146600	11.5956	146600	1.89378	146600	3.56265	146600	1.98608	146600	2.77462
146700	2.66879	146700	2.20408	146700	2.34552	146700	3.37131	146700	9.58502	146700	2.28755	146700	3.10346	146700	6.94994	146700	5.7567	146700	5.84168	146700	4.49118	146700	11.7071	146700	1.88544	146700	3.51679	146700	1.97398	146700	2.81778
146800	2.6502	146800	2.26003	146800	2.3246	146800	3.33695	146800	9.46912	146800	2.33931	146800	3.3166	146800	7.02287	146800	5.7257	146800	5.94087	146800	4.52339	146800	11.6206	146800	1.91065	146800	3.53898	146800	2.03835	146800	2.82984
146900	2.62203	146900	2.24712	146900	2.29023	146900	3.38813	146900	9.32027	146900	2.30644	146900	3.23078	146900	6.95447	146900	5.73887	146900	6.0201	146900	4.46288	146900	11.7492	146900	1.86627	146900	3.52724	146900	2.05912	146900	2.73262
147000	2.63044	147000	2.26909	147000	2.29293	147000	3.38445	147000	9.08715	147000	2.29572	147000	3.1677	147000	7.07017	147000	5.72192	147000	6.13907	147000	4.5109	147000	11.6045	147000	1.89286	147000	3.54186	147000	2.02718	147000	2.73217
147100	2.66807	147100	2.27333	147100	2.33231	147100	3.35438	147100	9.05995	147100	2.30502	147100	3.18266	147100	7.09707	147100	5.57496	147100	5.99083	147100	4.51599	147100	11.5677	147100	1.8805	147100	3.5151	147100	2.09223	147100	2.67069
147200	2.68787	147200	2.25036	147200	2.34519	147200	3.36111	147200	9.17837	147200	2.25607	147200	3.22005	147200	7.10997	147200	5.74354	147200	6.01341	147200	4.47755	147200	11.5714	147200	1.90194	147200	3.51669	147200	2.01002	147200	2.64732
147300	2.63837	147300	2.24507	147300	2.29545	147300	3.26675	147300	9.11935	147300	2.26679	147300	3.17117	147300	7.16435	147300	5.76893	147300	5.92139	147300	4.50529	147300	11.3804	147300	1.89363	147300	3.53144	147300	1.98743	147300	2.66308
147400	2.77054	147400	2.15513	147400	2.31162	147400	3.3326	147400	9.02861	147400	2.2569	147400	3.19426	147400	7.10983	147400	5.7436	147400	5.67355	147400	4.58103	147400	11.331	147400	1.92331	147400	3.49073	147400	2.01845	147400	2.62673
147500	2.73781	147500	2.15545	147500	2.3545	147500	3.31489	147500	9.02155	147500	2.29873	147500	3.23	147500	7.10668	147500	5.82115	147500	5.722	147500	4.62911	147500	11.2695	147500	1.99013	147500	3.44947	147500	1.99618	147500	2.74086
147600	2.69439	147600	2.17962	147600	2.3573	147600	3.28909	147600	9.13285	147600	2.29262	147600	3.21375	147600	7.08708	147600	5.78659	147600	5.66543	147600	4.55373	147600	11.0673	147600	1.95534	147600	3.44113	147600	2.03479	147600	2.87505
147700	2.72507	147700	2.21401	147700	2.37207	147700	3.30588	147700	9.12114	147700	2.29151	147700	3.19936	147700	7.17356	147700	5.84072	147700	5.65163	147700	4.61584	147700	11.0353	147700	1.91472	147700	3.51711	147700	2.02833	147700	2.9192
147800	2.7156	147800	2.15613	147800	2.34343	147800	3.31052	147800	9.16601	147800	2.31077	147800	3.30512	147800	7.18096	147800	5.70892	147800	5.70088	147800	4.5413	147800	10.9807	147800	1.84928	147800	3.52665	147800	1.98247	147800	2.96794
147900	2.72385	147900	2.22934	147900	2.40562	147900	3.34873	147900	9.12084	147900	2.26264	147900	3.40028	147900	7.07334	147900	5.81792	147900	5.52699	147900	4.55528	147900	11.0201	147900	1.86087	147900	3.51906	147900	2.02737	147900	3.04181
148000	2.73191	148000	2.18003	148000	2.36655	148000	3.28335	148000	9.16526	148000	2.27439	148000	3.56596	148000	6.9837	148000	5.7406	148000	5.58968	148000	4.49685	148000	10.9407	148000	1.8547	148000	3.5906	148000	2.04856	148000	2.95503
148100	2.70239	148100	2.18882	148100	2.33306	148100	3.29255	148100	9.21889	148100	2.32024	148100	3.49692	148100	7.02098	148100	5.71958	148100	5.57863	148100	4.51397	148100	11.0109	148100	1.86762	148100	3.51299	148100	2.05822	148100	2.95369
148200	2.6889	148200	2.25839	148200	2.32957	148200	3.27743	148200	9.32207	148200	2.3383	148200	3.44106	148200	6.99875	148200	5.76436	148200	5.62289	148200	4.55746	148200	10.9856	148200	1.85596	148200	3.45413	148200	1.99015	148200	2.9406
148300	2.5959	148300	2.28918	148300	2.30102	148300	3.31933	148300	9.34855	148300	2.45016	148300	3.5224	148300	7.0369	148300	5.74005	148300	5.56236	148300	4.56499	148300	10.9264	148300	1.87056	148300	3.50475	148300	2.0569	148300	2.93874
148400	2.62632	148400	2.35268	148400	2.38921	148400	3.30727	148400	9.36756	148400	2.43167	148400	3.50364	148400	7.39726	148400	5.73979	148400	5.6227	148400	4.64522	148400	10.9281	148400	1.87169	148400	3.58562	148400	2.03115	148400	2.97957
148500	2.64162	148500	2.28533	148500	2.43744	148500	3.29565	148500	9.38458	148500	2.44888	148500	3.54959	148500	7.20771	148500	5.79447	148500	5.6448	148500	4.65854	148500	10.7225	148500	1.84319	148500	3.49258	148500	2.06825	148500	2.94876
148600	2.57447	148600	2.35107	148600	2.46394	148600	3.29082	148600	9.30166	148600	2.47074	148600	3.4667	148600	7.37257	148600	5.64893	148600	5.57167	148600	4.61127	148600	10.7757	148600	1.86166	148600	3.56459	148600	2.08428	148600	2.95008
148700	2.62227	148700	2.34224	148700	2.4645	148700	3.28506	148700	9.37955	148700	2.4618	148700	3.58926	148700	7.3128	148700	5.60758	148700	5.67704	148700	4.54805	148700	10.7913	148700	1.87456	148700	3.54858	148700	2.02742	148700	3.01362
148800	2.65279	148800	2.33679	148800	2.46424	148800	3.33785	148800	9.40409	148800	2.48466	148800	3.78073	148800	7.21578	148800	5.67558	148800	5.77022	148800	4.49778	148800	10.8991	148800	1.85216	148800	3.56593	148800	1.9913	148800	2.95059
148900	2.59016	148900	2.4482	148900	2.41784	148900	3.38206	148900	9.45217	148900	2.4355	148900	3.79953	148900	7.04937	148900	5.62622	148900	5.80807	148900	4.62821	148900	10.8238	148900	1.82466	148900	3.54094	148900	2.07639	148900	2.88527
149000	2.6541	149000	2.41652	149000	2.42791	149000	3.37282	149000	9.27358	149000	2.40391	149000	3.88631	149000	7.15675	149000	5.79199	149000	5.97274	149000	4.50392	149000	10.7821	149000	1.83297	149000	3.56087	149000	2.00407	149000	2.89854
149100	2.65745	149100	2.41091	149100	2.42482	149100	3.30918	149100	9.12326	149100	2.40414	149100	3.74658	149100	7.09873	149100	5.95181	149100	5.955	149100	4.49743	149100	10.8301	149100	1.81793	149100	3.43455	149100	2.03036	149100	2.84731
149200	2.68	149200	2.35128	149200	2.42236	149200	3.34395	149200	8.96932	149200	2.43449	149200	3.84919	149200	7.00607	149200	5.87754	149200	5.94388	149200	4.4376	149200	11.0093	149200	1.90744	149200	3.46847	149200	2.08489	149200	2.9929
149300	2.67459	149300	2.38162	149300	2.43449	149300	3.33269	149300	8.85102	149300	2.37012	149300	3.93111	149300	7.08147	149300	5.94915	149300	6.34406	149300	4.37309	149300	11.1536	149300	1.89104	149300	3.47359	149300	2.07075	149300	2.974
149400	2.66554	149400	2.37685	149400	2.44376	149400	3.32909	149400	8.93314	149400	2.43603	149400	3.91809	149400	7.05301	149400	5.85086	149400	6.31129	149400	4.3761	149400	11.1301	149400	1.8703	149400	3.43631	149400	2.06877	149400	2.93021
149500	2.67566	149500	2.30162	149500	2.43354	149500	3.23606	149500	9.03337	149500	2.52292	149500	3.9697	149500	7.06435	149500	5.93523	149500	6.32256	149500	4.30851	149500	11.2097	149500	1.84058	149500	3.37409	149500	2.11809	149500	2.8309
149600	2.70228	149600	2.33271	149600	2.39005	149600	3.31118	149600	9.12008	149600	2.43924	149600	3.81135	149600	7.04104	149600	5.97306	149600	6.30331	149600	4.40388	149600	11.3297	149600	1.93811	149600	3.47736	149600	2.03272	149600	2.85441
149700	2.77623	149700	2.41331	149700	2.4025	149700	3.32593	149700	9.20667	149700	2.43235	149700	3.77495	149700	7.11419	149700	5.98933	149700	6.30386	149700	4.38397	149700	11.3527	149700	1.84881	149700	3.47936	149700	2.06068	149700	2.83489
149800	2.72301	149800	2.36691	149800	2.32919	149800	3.31128	149800	9.27971	149800	2.403	149800	3.51516	149800	7.01722	149800	6.02618	149800	6.26673	149800	4.33205	149800	11.1905	149800	1.9294	149800	3.41204	149800	2.14535	149800	2.73476
149900	2.75296	149900	2.30079	149900	2.32323	149900	3.26318	149900	9.33203	149900	2.44469	149900	3.49759	149900	7.02103	149900	6.16204	149900	6.38268	149900	4.28945	149900	11.152	149900	1.92394	149900	3.43227	149900	2.10879	149900	2.72445
150000	2.71913	150000	2.2898	150000	2.29704	150000	3.18987	150000	9.28041	150000	2.44458	150000	3.57471	150000	7.01408	150000	6.28403	150000	6.17428	150000	4.29207	150000	11.2119	150000	1.9372	150000	3.41395	150000	2.09876	150000	2.81166
150100	2.67276	150100	2.42288	150100	2.32996	150100	3.20644	150100	9.29212	150100	2.53346	150100	3.71181	150100	6.93292	150100	6.25011	150100	6.11815	150100	4.35578	150100	11.0204	150100	1.95434	150100	3.43026	150100	2.01601	150100	2.79572
150200	2.63159	150200	2.44171	150200	2.32442	150200	3.25209	150200	9.28647	150200	2.4629	150200	3.74732	150200	7.0414	150200	6.37251	150200	6.00443	150200	4.31808	150200	11.0646	150200	1.97597	150200	3.43971	150200	2.06651	150200	2.81336
150300	2.70627	150300	2.39979	150300	2.30571	150300	3.17922	150300	9.26133	150300	2.47185	150300	3.86918	150300	7.0698	150300	6.39299	150300	5.93286	150300	4.39557	150300	11.2129	150300	1.95658	150300	3.42418	150300	2.08074	150300	2.87585
150400	2.69904	150400	2.36033	150400	2.23543	150400	3.24003	150400	9.38407	150400	2.51464	150400	3.74293	150400	7.20048	150400	6.4563	150400	5.76077	150400	4.32787	150400	11.202	150400	1.92167	150400	3.38332	150400	2.08503	150400	2.97764
150500	2.698	150500	2.36642	150500	2.20452	150500	3.19372	150500	9.42489	150500	2.56848	150500	3.80947	150500	7.35067	150500	6.44152	150500	6.03273	150500	4.35311	150500	11.1243	150500	1.93569	150500	3.41344	150500	2.04584	150500	2.88593
150600	2.72633	150600	2.37215	150600	2.21325	150600	3.18025	150600	9.46263	150600	2.54002	150600	3.81883	150600	7.31769	150600	6.45746	150600	5.99173	150600	4.30932	150600	11.1428	150600	1.96964	150600	3.48646	150600	2.01894	150600	2.86626
150700	2.70865	150700	2.38253	150700	2.17822	150700	3.18495	150700	9.3341	150700	2.5618	150700	3.81198	150700	7.4221	150700	6.47581	150700	6.20525	150700	4.36163	150700	11.3584	150700	1.95129	150700	3.42937	150700	2.04538	150700	2.80925
150800	2.75715	150800	2.46865	150800	2.19629	150800	3.18982	150800	9.4006	150800	2.57441	150800	3.85238	150800	7.40845	150800	6.42619	150800	6.24277	150800	4.44545	150800	11.33	150800	1.96152	150800	3.41716	150800	2.06036	150800	2.94323
150900	2.75581	150900	2.33644	150900	2.17372	150900	3.16154	150900	9.30357	150900	2.48153	150900	3.89142	150900	7.40259	150900	6.39611	150900	6.20283	150900	4.34562	150900	11.5121	150900	1.90939	150900	3.44721	150900	2.03271	150900	2.90576
151000	2.73344	151000	2.29235	151000	2.22298	151000	3.18429	151000	9.30947	151000	2.43944	151000	4.02857	151000	7.36471	151000	6.41033	151000	6.14135	151000	4.38849	151000	11.4714	151000	1.97812	151000	3.4552	151000	2.05853	151000	2.91013
151100	2.66647	151100	2.3305	151100	2.19481	151100	3.17795	151100	9.15248	151100	2.48083	151100	3.91645	151100	7.30662	151100	6.48943	151100	6.04397	151100	4.3409	151100	11.4007	151100	1.99739	151100	3.51061	151100	2.07274	151100	2.87805
151200	2.68534	151200	2.31579	151200	2.19366	151200	3.22488	151200	9.27688	151200	2.40825	151200	3.80094	151200	7.33107	151200	6.43919	151200	5.80152	151200	4.27038	151200	11.3313	151200	2.01076	151200	3.43361	151200	2.06075	151200	2.75408
151300	2.63764	151300	2.32953	151300	2.20576	151300	3.15905	151300	9.35199	151300	2.38309	151300	3.77099	151300	7.21086	151300	6.33753	151300	5.89241	151300	4.25628	151300	11.4213	151300	1.99239	151300	3.4965	151300	2.04991	151300	2.77063
151400	2.68464	151400	2.30281	151400	2.18526	151400	3.14281	151400	9.30554	151400	2.39444	151400	3.76068	151400	7.07283	151400	6.15133	151400	5.97864	151400	4.28709	151400	11.3984	151400	1.94666	151400	3.49368	151400	2.05989	151400	2.75675
151500	2.71413	151500	2.34122	151500	2.18016	151500	3.19735	151500	9.3698	151500	2.50427	151500	3.75721	151500	7.12925	151500	6.17696	151500	5.92075	151500	4.34248	151500	11.3884	151500	1.94673	151500	3.53909	151500	2.05238	151500	2.86083
151600	2.64969	151600	2.26881	151600	2.22601	151600	3.18952	151600	9.36437	151600	2.39325	151600	3.72373	151600	7.20653	151600	6.14582	151600	5.98091	151600	4.39179	151600	11.2682	151600	1.94163	151600	3.51635	151600	2.06445	151600	2.84172
151700	2.61964	151700	2.31035	151700	2.24238	151700	3.17044	151700	9.37486	151700	2.45017	151700	3.68931	151700	7.2031	151700	6.14813	151700	5.82597	151700	4.44152	151700	11.3264	151700	1.95719	151700	3.42896	151700	2.14464	151700	2.84321
151800	2.5616	151800	2.36986	151800	2.20522	151800	3.20748	151800	9.73877	151800	2.44236	151800	3.77644	151800	7.30006	151800	6.15179	151800	5.89039	151800	4.4466	151800	11.3511	151800	1.89427	151800	3.52231	151800	2.10566	151800	2.79235
151900	2.67666	151900	2.36392	151900	2.20502	151900	3.17324	151900	9.63325	151900	2.39678	151900	3.80286	151900	7.37208	151900	6.31547	151900	5.85	151900	4.41445	151900	11.3394	151900	1.88481	151900	3.58145	151900	2.09511	151900	2.82479
152000	2.639	152000	2.32969	152000	2.17608	152000	3.27713	152000	9.67946	152000	2.46362	152000	3.89846	152000	7.32884	152000	6.40787	152000	5.84237	152000	4.42811	152000	11.2108	152000	1.96041	152000	3.58672	152000	2.07692	152000	2.86989
152100	2.56824	152100	2.34989	152100	2.2378	152100	3.27081	152100	9.49196	152100	2.47592	152100	3.84985	152100	7.27973	152100	6.35762	152100	5.87651	152100	4.43414	152100	11.1371	152100	1.91394	152100	3.51398	152100	2.07874	152100	2.89207
152200	2.637	152200	2.32785	152200	2.22715	152200	3.26816	152200	9.41468	152200	2.46639	152200	3.84204	152200	7.21262	152200	6.48462	152200	5.78441	152200	4.48792	152200	11.1196	152200	1.95528	152200	3.45507	152200	2.06685	152200	2.99267
152300	2.62701	152300	2.3343	152300	2.2335	152300	3.25956	152300	9.62633	152300	2.45112	152300	3.70402	152300	7.08695	152300	6.33217	152300	5.69785	152300	4.5368	152300	11.1728	152300	2.02402	152300	3.471	152300	2.09403	152300	2.97192
152400	2.56073	152400	2.28287	152400	2.21203	152400	3.27528	152400	9.47306	152400	2.43564	152400	3.53358	152400	6.99439	152400	6.17546	152400	5.64521	152400	4.44567	152400	11.163	152400	2.04193	152400	3.46553	152400	2.01383	152400	2.98376
152500	2.62702	152500	2.24191	152500	2.23853	152500	3.21925	152500	9.31987	152500	2.44011	152500	3.54106	152500	6.97794	152500	5.99674	152500	5.51185	152500	4.48583	152500	11.0552	152500	2.00309	152500	3.53201	152500	2.11012	152500	2.94898
152600	2.66757	152600	2.28628	152600	2.28337	152600	3.20451	152600	9.24784	152600	2.40981	152600	3.68151	152600	7.00779	152600	6.04355	152600	5.5435	152600	4.48514	152600	11.1556	152600	2.03029	152600	3.52625	152600	2.09392	152600	2.95005
152700	2.63721	152700	2.28864	152700	2.25456	152700	3.18282	152700	8.84059	152700	2.40708	152700	3.6345	152700	6.98028	152700	6.11598	152700	5.47309	152700	4.47344	152700	11.1491	152700	1.9883	152700	3.48706	152700	2.11754	152700	2.80879
152800	2.61916	152800	2.2793	152800	2.29026	152800	3.14475	152800	8.64977	152800	2.46776	152800	3.44151	152800	6.86128	152800	6.11568	152800	5.47969	152800	4.52386	152800	11.2451	152800	2.03617	152800	3.53355	152800	2.06988	152800	2.87469
152900	2.7059	152900	2.19583	152900	2.26321	152900	3.22907	152900	8.37206	152900	2.43614	152900	3.46381	152900	6.90053	152900	6.06861	152900	5.48027	152900	4.45163	152900	11.3065	152900	2.06196	152900	3.51463	152900	2.03223	152900	2.71216
153000	2.711	153000	2.20609	153000	2.22466	153000	3.27069	153000	8.3552	153000	2.36371	153000	3.54458	153000	6.77692	153000	6.26217	153000	5.43555	153000	4.39152	153000	11.1659	153000	2.04861	153000	3.56939	153000	1.98743	153000	2.81545
153100	2.75071	153100	2.254	153100	2.21166	153100	3.27966	153100	8.27561	153100	2.45477	153100	3.53739	153100	6.68355	153100	6.20143	153100	5.40835	153100	4.54595	153100	11.2065	153100	2.01289	153100	3.49172	153100	2.02868	153100	2.85054
153200	2.70042	153200	2.18483	153200	2.20861	153200	3.20789	153200	8.07485	153200	2.53142	153200	3.60642	153200	6.50947	153200	6.34189	153200	5.41548	153200	4.53332	153200	11.3254	153200	2.03216	153200	3.46111	153200	2.01828	153200	2.8123
153300	2.73816	153300	2.13977	153300	2.21352	153300	3.26366	153300	8.12887	153300	2.54099	153300	3.65687	153300	6.50547	153300	6.23922	153300	5.52769	153300	4.5241	153300	11.3848	153300	1.99556	153300	3.54397	153300	2.02006	153300	2.81144
153400	2.77057	153400	2.1657	153400	2.18152	153400	3.2847	153400	8.24817	153400	2.47242	153400	3.64443	153400	6.37206	153400	6.368	153400	5.52719	153400	4.51587	153400	11.3768	153400	1.97887	153400	3.49781	153400	2.02278	153400	2.79001
153500	2.75578	153500	2.1587	153500	2.14969	153500	3.25436	153500	8.3615	153500	2.50715	153500	3.67772	153500	6.61876	153500	6.39139	153500	5.69125	153500	4.49091	153500	11.3869	153500	2.03082	153500	3.49612	153500	1.99817	153500	2.82127
153600	2.68775	153600	2.07908	153600	2.07597	153600	3.28902	153600	8.33362	153600	2.52151	153600	3.75395	153600	6.64487	153600	6.44417	153600	5.81536	153600	4.49352	153600	11.4761	153600	2.03457	153600	3.54276	153600	2.10098	153600	2.92901
153700	2.69554	153700	2.14913	153700	2.12638	153700	3.21699	153700	8.42748	153700	2.49417	153700	3.60423	153700	6.55607	153700	6.41789	153700	5.71917	153700	4.47406	153700	11.3619	153700	1.97353	153700	3.50078	153700	2.03363	153700	2.94168
153800	2.70719	153800	2.1328	153800	2.17382	153800	3.26222	153800	8.3166	153800	2.54134	153800	3.54511	153800	6.78511	153800	6.38985	153800	5.69055	153800	4.47234	153800	11.2432	153800	2.03548	153800	3.61076	153800	2.01716	153800	2.939
153900	2.61904	153900	2.23559	153900	2.22744	153900	3.28911	153900	8.1415	153900	2.53382	153900	3.52288	153900	6.62343	153900	6.34554	153900	5.56068	153900	4.48179	153900	11.2501	153900	2.09129	153900	3.63136	153900	2.03481	153900	2.87953
154000	2.61043	154000	2.22317	154000	2.24988	154000	3.31885	154000	8.23542	154000	2.51351	154000	3.55123	154000	6.44989	154000	6.50525	154000	5.48437	154000	4.50616	154000	11.0432	154000	2.07012	154000	3.58172	154000	1.96862	154000	2.93503
154100	2.69439	154100	2.26444	154100	2.223	154100	3.30571	154100	8.31272	154100	2.59929	154100	3.53236	154100	6.42351	154100	6.51485	154100	5.38508	154100	4.46485	154100	11.0096	154100	2.15799	154100	3.64748	154100	1.96332	154100	2.92151
154200	2.76013	154200	2.21704	154200	2.24513	154200	3.24357	154200	8.4622	154200	2.47216	154200	3.49519	154200	6.24344	154200	6.55674	154200	5.34078	154200	4.50908	154200	11.0929	154200	2.08417	154200	3.64081	154200	1.98742	154200	2.97711
154300	2.75705	154300	2.214	154300	2.20083	154300	3.21326	154300	8.57288	154300	2.5504	154300	3.40374	154300	6.21336	154300	6.48712	154300	5.35097	154300	4.52295	154300	10.8525	154300	2.11732	154300	3.56903	154300	2.04781	154300	3.00514
154400	2.71865	154400	2.20557	154400	2.16858	154400	3.3334	154400	8.59778	154400	2.5311	154400	3.47683	154400	6.08938	154400	6.32259	154400	5.38152	154400	4.52347	154400	10.8285	154400	2.12003	154400	3.52859	154400	2.01686	154400	2.90316
154500	2.73193	154500	2.14306	154500	2.13667	154500	3.29551	154500	8.59011	154500	2.45947	154500	3.47496	154500	6.1085	154500	6.52185	154500	5.32891	154500	4.49663	154500	10.6	154500	2.07977	154500	3.63147	154500	2.12166	154500	2.91609
154600	2.7421	154600	2.1255	154600	2.16548	154600	3.28967	154600	8.71543	154600	2.48999	154600	3.37587	154600	6.13685	154600	6.61416	154600	5.3838	154600	4.39571	154600	10.5174	154600	2.05044	154600	3.6	154600	2.12384	154600	2.86828
154700	2.72191	154700	2.09886	154700	2.19504	154700	3.25027	154700	8.61917	154700	2.47946	154700	3.28329	154700	6.03537	154700	6.65448	154700	5.4684	154700	4.45557	154700	10.3973	154700	2.03971	154700	3.52214	154700	2.14572	154700	3.01198
154800	2.69269	154800	2.10198	154800	2.22228	154800	3.20875	154800	8.4977	154800	2.43557	154800	3.38174	154800	6.06867	154800	6.70327	154800	5.47694	154800	4.49287	154800	10.3788	154800	2.03629	154800	3.45877	154800	2.15192	154800	2.91865
154900	2.68479	154900	2.09578	154900	2.26167	154900	3.17088	154900	8.38097	154900	2.42954	154900	3.41705	154900	6.05859	154900	6.7867	154900	5.49677	154900	4.48558	154900	10.3735	154900	2.02564	154900	3.396	154900	2.134	154900	3.03056
155000	2.68001	155000	2.07594	155000	2.19727	155000	3.11874	155000	8.49565	155000	2.4068	155000	3.25785	155000	6.02365	155000	6.62754	155000	5.55361	155000	4.45467	155000	10.3649	155000	2.05259	155000	3.40382	155000	1.97932	155000	2.96035
155100	2.64671	155100	2.09708	155100	2.18702	155100	3.16573	155100	8.41996	155100	2.55068	155100	3.15229	155100	5.93256	155100	6.61768	155100	5.48234	155100	4.4051	155100	10.3355	155100	1.96816	155100	3.3625	155100	2.02137	155100	3.02096
155200	2.6362	155200	2.09436	155200	2.14169	155200	3.13304	155200	8.53787	155200	2.4659	155200	3.09138	155200	5.96894	155200	6.72108	155200	5.56891	155200	4.40187	155200	10.3122	155200	1.95892	155200	3.45461	155200	2.05983	155200	2.97132
155300	2.60606	155300	2.21064	155300	2.14378	155300	3.05638	155300	8.6393	155300	2.37682	155300	3.09738	155300	5.82431	155300	6.80197	155300	5.52175	155300	4.38147	155300	10.3959	155300	1.97251	155300	3.41133	155300	2.05424	155300	3.09144
155400	2.6325	155400	2.19924	155400	2.19714	155400	3.24355	155400	8.74909	155400	2.3743	155400	3.08605	155400	5.98653	155400	6.7762	155400	5.5588	155400	4.42762	155400	10.2981	155400	2.0016	155400	3.49969	155400	2.04459	155400	3.13747
155500	2.71958	155500	2.17531	155500	2.21627	155500	3.24109	155500	8.59545	155500	2.34617	155500	3.14051	155500	5.90096	155500	6.8152	155500	5.57446	155500	4.41226	155500	10.3981	155500	2.01399	155500	3.45553	155500	1.98348	155500	3.15008
155600	2.64865	155600	2.15731	155600	2.28201	155600	3.21081	155600	8.46916	155600	2.37409	155600	3.19132	155600	5.67896	155600	6.74645	155600	5.59475	155600	4.42779	155600	10.2445	155600	2.00646	155600	3.38253	155600	2.04847	155600	3.08087
155700	2.69636	155700	2.27306	155700	2.25179	155700	3.19675	155700	8.50978	155700	2.35987	155700	3.18876	155700	5.72613	155700	6.66722	155700	5.50636	155700	4.39553	155700	10.4141	155700	2.12351	155700	3.39181	155700	1.98378	155700	3.1002
155800	2.70093	155800	2.31263	155800	2.29945	155800	3.03408	155800	8.62691	155800	2.42149	155800	3.11923	155800	5.63644	155800	6.6888	155800	5.57377	155800	4.4341	155800	10.4001	155800	2.08833	155800	3.47545	155800	1.99789	155800	3.07784
155900	2.66917	155900	2.27956	155900	2.31443	155900	3.15727	155900	8.42291	155900	2.44472	155900	3.08486	155900	5.84659	155900	6.52075	155900	5.42003	155900	4.44522	155900	10.3763	155900	2.08336	155900	3.43654	155900	2.01092	155900	3.08191
156000	2.66518	156000	2.36656	156000	2.31195	156000	3.15784	156000	8.30727	156000	2.42886	156000	3.11084	156000	5.88051	156000	6.4538	156000	5.40035	156000	4.46483	156000	10.4527	156000	2.08418	156000	3.36083	156000	1.99461	156000	2.94962
156100	2.66437	156100	2.34477	156100	2.28984	156100	3.24506	156100	8.48481	156100	2.46052	156100	3.11584	156100	5.76201	156100	6.54646	156100	5.47484	156100	4.41152	156100	10.4001	156100	2.07776	156100	3.35662	156100	2.02721	156100	3.0156
156200	2.62488	156200	2.37383	156200	2.28635	156200	3.15528	156200	8.72022	156200	2.48455	156200	3.04063	156200	5.85154	156200	6.51074	156200	5.45193	156200	4.39304	156200	10.3718	156200	2.05363	156200	3.41286	156200	1.99257	156200	3.05591
156300	2.62731	156300	2.39175	156300	2.31195	156300	3.14303	156300	8.81787	156300	2.45566	156300	2.9841	156300	5.76218	156300	6.5596	156300	5.3737	156300	4.41102	156300	10.5077	156300	2.11429	156300	3.43947	156300	1.99872	156300	2.9934
156400	2.68197	156400	2.37316	156400	2.27028	156400	3.14305	156400	8.86719	156400	2.44451	156400	2.95539	156400	5.97793	156400	6.6193	156400	5.289	156400	4.41092	156400	10.4443	156400	2.16099	156400	3.35804	156400	1.99011	156400	2.97505
156500	2.70998	156500	2.43498	156500	2.27734	156500	3.2567	156500	9.00676	156500	2.41722	156500	3.04492	156500	6.00668	156500	6.53628	156500	5.27873	156500	4.43226	156500	10.3922	156500	2.05859	156500	3.3656	156500	2.09256	156500	2.98171
156600	2.70553	156600	2.38275	156600	2.29249	156600	3.20181	156600	8.87897	156600	2.44953	156600	3.00397	156600	6.00622	156600	6.66369	156600	5.15503	156600	4.43215	156600	10.258	156600	2.10945	156600	3.36156	156600	2.09648	156600	2.95979
156700	2.74333	156700	2.34011	156700	2.24533	156700	3.09015	156700	8.97827	156700	2.40826	156700	3.08284	156700	5.86124	156700	6.55938	156700	5.0422	156700	4.39631	156700	10.3717	156700	2.0777	156700	3.30774	156700	2.05093	156700	3.02027
156800	2.78939	156800	2.36009	156800	2.23685	156800	3.03784	156800	9.1747	156800	2.42752	156800	3.14736	156800	5.89147	156800	6.50802	156800	5.06801	156800	4.51065	156800	10.403	156800	2.04716	156800	3.34984	156800	2.05509	156800	2.91984
156900	2.74352	156900	2.39774	156900	2.19452	156900	3.14427	156900	8.96155	156900	2.44546	156900	3.23227	156900	5.68931	156900	6.33807	156900	5.00253	156900	4.49713	156900	10.4024	156900	2.02518	156900	3.33885	156900	2.00372	156900	2.91847
157000	2.78706	157000	2.3552	157000	2.18236	157000	3.15763	157000	9.12523	157000	2.47398	157000	3.2047	157000	5.73638	157000	6.314	157000	5.09191	157000	4.57061	157000	10.5306	157000	2.04448	157000	3.34433	157000	2.01736	157000	2.98502
157100	2.74486	157100	2.35324	157100	2.2482	157100	3.14634	157100	9.12662	157100	2.45929	157100	3.16561	157100	5.82715	157100	6.42859	157100	5.02857	157100	4.5179	157100	10.5913	157100	2.08581	157100	3.33015	157100	2.01301	157100	3.02568
157200	2.67644	157200	2.2833	157200	2.27798	157200	3.13356	157200	8.89784	157200	2.46205	157200	3.13221	157200	5.64326	157200	6.45193	157200	5.14551	157200	4.46872	157200	10.797	157200	2.08803	157200	3.3313	157200	1.99194	157200	3.0025
157300	2.68199	157300	2.22714	157300	2.22322	157300	3.14605	157300	8.86912	157300	2.50598	157300	3.25515	157300	5.73173	157300	6.64118	157300	5.19294	157300	4.48949	157300	10.7487	157300	2.12355	157300	3.29554	157300	1.99983	157300	2.9933
157400	2.63042	157400	2.2128	157400	2.21357	157400	3.13564	157400	9.02015	157400	2.50042	157400	3.17722	157400	5.76095	157400	6.59625	157400	5.15419	157400	4.52779	157400	10.7014	157400	2.11053	157400	3.29673	157400	2.01692	157400	2.93077
157500	2.66478	157500	2.20581	157500	2.23919	157500	3.07039	157500	9.13201	157500	2.54041	157500	3.22838	157500	5.76784	157500	6.53326	157500	5.08449	157500	4.53453	157500	10.7614	157500	2.12127	157500	3.31033	157500	2.04195	157500	2.96693
157600	2.72763	157600	2.1687	157600	2.24425	157600	3.26733	157600	9.24106	157600	2.5203	157600	3.18819	157600	5.77329	157600	6.60434	157600	5.13872	157600	4.50675	157600	10.729	157600	2.13925	157600	3.27538	157600	1.97433	157600	3.0843
157700	2.66296	157700	2.21503	157700	2.19786	157700	3.27831	157700	9.54547	157700	2.48944	157700	3.19764	157700	5.76497	157700	6.51841	157700	5.15826	157700	4.45787	157700	10.8349	157700	2.16093	157700	3.2214	157700	2.00532	157700	3.04536
157800	2.659	157800	2.21388	157800	2.27198	157800	3.33471	157800	9.36921	157800	2.44194	157800	3.2089	157800	5.60235	157800	6.34674	157800	5.06276	157800	4.49483	157800	10.7569	157800	2.19175	157800	3.25392	157800	2.00687	157800	3.09788
157900	2.67776	157900	2.24574	157900	2.28569	157900	3.34232	157900	9.39835	157900	2.4903	157900	3.32998	157900	5.59624	157900	6.2953	157900	5.07968	157900	4.5953	157900	10.7041	157900	2.1636	157900	3.28055	157900	2.0824	157900	3.11959
158000	2.66121	158000	2.24547	158000	2.22894	158000	3.24738	158000	9.49882	158000	2.49016	158000	3.35223	158000	5.64636	158000	6.2373	158000	5.08009	158000	4.53878	158000	10.8858	158000	2.1085	158000	3.27949	158000	2.06274	158000	3.03749
158100	2.61701	158100	2.19991	158100	2.14025	158100	3.14236	158100	9.49241	158100	2.49799	158100	3.30778	158100	5.49927	158100	6.44701	158100	5.08084	158100	4.53761	158100	10.7381	158100	2.09299	158100	3.33074	158100	2.01461	158100	3.08881
158200	2.58747	158200	2.26384	158200	2.17074	158200	3.21314	158200	9.33624	158200	2.55216	158200	3.33924	158200	5.62	158200	6.25634	158200	5.09859	158200	4.46837	158200	10.753	158200	2.12141	158200	3.31159	158200	2.05291	158200	3.12353
158300	2.5807	158300	2.24913	158300	2.1632	158300	3.28377	158300	9.26397	158300	2.47051	158300	3.26018	158300	5.56068	158300	6.26202	158300	5.05067	158300	4.52176	158300	10.6128	158300	2.16548	158300	3.2445	158300	2.01626	158300	3.19423
158400	2.6206	158400	2.28119	158400	2.10188	158400	3.17085	158400	9.0519	158400	2.51582	158400	3.221	158400	5.67198	158400	6.13512	158400	5.09593	158400	4.48606	158400	10.735	158400	2.13002	158400	3.30033	158400	2.03147	158400	3.14202
158500	2.60873	158500	2.22991	158500	2.11575	158500	3.23518	158500	9.04755	158500	2.56201	158500	3.14486	158500	5.62086	158500	6.21205	158500	5.06922	158500	4.53937	158500	10.6559	158500	2.0625	158500	3.33724	158500	2.03664	158500	3.09676
158600	2.60072	158600	2.16078	158600	2.05313	158600	3.25035	158600	8.83991	158600	2.48601	158600	3.11013	158600	5.59169	158600	6.08578	158600	5.1025	158600	4.49563	158600	10.5152	158600	2.06969	158600	3.35461	158600	2.08018	158600	3.07894
158700	2.59043	158700	2.1777	158700	2.16464	158700	3.23379	158700	8.67669	158700	2.46277	158700	3.05238	158700	5.64855	158700	6.07532	158700	5.0836	158700	4.54384	158700	10.6928	158700	2.00348	158700	3.34032	158700	2.12789	158700	3.0437
158800	2.63975	158800	2.04498	158800	2.11382	158800	3.31829	158800	8.64575	158800	2.49518	158800	2.99898	158800	5.56312	158800	6.1055	158800	5.06776	158800	4.52564	158800	10.6282	158800	2.00455	158800	3.31597	158800	2.14693	158800	2.94077
158900	2.57722	158900	2.11387	158900	2.14097	158900	3.24225	158900	8.80355	158900	2.55399	158900	3.02666	158900	5.68402	158900	6.14695	158900	5.16732	158900	4.48558	158900	10.7239	158900	1.99466	158900	3.3543	158900	2.12611	158900	3.0195
159000	2.59356	159000	2.17603	159000	2.14366	159000	3.2893	159000	8.83909	159000	2.60421	159000	3.0309	159000	5.71023	159000	6.11918	159000	5.16708	159000	4.57664	159000	10.7051	159000	2.00505	159000	3.2274	159000	2.13703	159000	2.96728
159100	2.54345	159100	2.19176	159100	2.12705	159100	3.25549	159100	8.72104	159100	2.56399	159100	3.08277	159100	5.74136	159100	6.11293	159100	5.16496	159100	4.5543	159100	10.4701	159100	2.03894	159100	3.36555	159100	2.0395	159100	2.88245
159200	2.59181	159200	2.18375	159200	2.06808	159200	3.28854	159200	8.65171	159200	2.60278	159200	3.10988	159200	5.68558	159200	6.07829	159200	5.18204	159200	4.67504	159200	10.554	159200	2.04905	159200	3.37013	159200	2.08313	159200	2.85079
159300	2.61764	159300	2.16926	159300	2.12649	159300	3.26646	159300	8.62758	159300	2.49979	159300	3.04118	159300	5.79472	159300	6.10684	159300	5.13483	159300	4.64931	159300	10.6097	159300	2.01469	159300	3.32235	159300	2.04229	159300	2.78012
159400	2.64734	159400	2.20967	159400	2.07933	159400	3.27243	159400	8.63954	159400	2.53483	159400	3.0689	159400	5.58492	159400	6.16789	159400	5.0724	159400	4.58623	159400	10.4268	159400	2.08643	159400	3.28787	159400	2.09016	159400	2.90766
159500	2.60938	159500	2.28146	159500	2.03831	159500	3.33295	159500	8.7828	159500	2.51016	159500	3.04587	159500	5.55199	159500	6.11194	159500	5.07399	159500	4.59267	159500	10.3733	159500	2.03783	159500	3.29774	159500	2.09062	159500	2.8977
159600	2.60255	159600	2.31225	159600	2.06313	159600	3.32345	159600	8.88129	159600	2.50811	159600	3.16401	159600	5.54472	159600	6.14124	159600	5.09572	159600	4.58828	159600	10.5915	159600	2.08031	159600	3.31632	159600	2.14039	159600	2.73645
159700	2.57871	159700	2.2527	159700	2.0844	159700	3.30488	159700	8.85107	159700	2.36375	159700	3.195	159700	5.37509	159700	6.18181	159700	5.06229	159700	4.56021	159700	10.445	159700	1.96803	159700	3.30963	159700	2.12126	159700	2.83798
159800	2.5897	159800	2.22888	159800	2.03772	159800	3.37311	159800	8.73423	159800	2.3766	159800	3.18603	159800	5.48083	159800	6.11029	159800	5.16918	159800	4.59755	159800	10.286	159800	1.99139	159800	3.30458	159800	2.13139	159800	2.88675
159900	2.61871	159900	2.2375	159900	2.10518	159900	3.24239	159900	9.02348	159900	2.44967	159900	3.22796	159900	5.46583	159900	5.98393	159900	5.26211	159900	4.60149	159900	10.139	159900	1.95061	159900	3.28758	159900	2.14367	159900	2.7738
160000	2.59989	160000	2.13256	160000	2.07996	160000	3.2031	160000	9.17214	160000	2.40778	160000	3.34661	160000	5.41591	160000	6.06085	160000	5.30834	160000	4.62331	160000	10.1265	160000	1.97509	160000	3.34204	160000	2.16201	160000	2.83686
160100	2.64654	160100	2.1247	160100	2.13071	160100	3.24678	160100	9.48221	160100	2.35474	160100	3.28466	160100	5.45153	160100	5.84324	160100	5.43916	160100	4.54088	160100	9.88234	160100	1.90073	160100	3.35808	160100	2.18431	160100	2.84228
160200	2.64311	160200	2.18763	160200	2.14662	160200	3.25348	160200	9.4752	160200	2.47711	160200	3.29055	160200	5.60368	160200	5.77894	160200	5.42882	160200	4.6554	160200	9.80926	160200	1.85673	160200	3.31063	160200	2.15016	160200	2.78168
160300	2.67707	160300	2.14203	160300	2.16928	160300	3.24866	160300	9.53924	160300	2.51871	160300	3.17545	160300	5.513	160300	5.79209	160300	5.47117	160300	4.57126	160300	9.8064	160300	1.84667	160300	3.37197	160300	2.17618	160300	2.75288
160400	2.67229	160400	2.08226	160400	2.14531	160400	3.22741	160400	9.23782	160400	2.52428	160400	3.21625	160400	5.50435	160400	5.87939	160400	5.49614	160400	4.59591	160400	9.97972	160400	1.92805	160400	3.34857	160400	2.23495	160400	2.76366
160500	2.64748	160500	2.21129	160500	2.12129	160500	3.27218	160500	9.45651	160500	2.51379	160500	3.11299	160500	5.47411	160500	6.01742	160500	5.38279	160500	4.5719	160500	10.1017	160500	1.91022	160500	3.35711	160500	2.16147	160500	2.74789
160600	2.65005	160600	2.26489	160600	2.16112	160600	3.24797	160600	9.68627	160600	2.46468	160600	3.15357	160600	5.52509	160600	6.03442	160600	5.35918	160600	4.62772	160600	10.0158	160600	1.86873	160600	3.3143	160600	2.11563	160600	2.79872
160700	2.69337	160700	2.26127	160700	2.14941	160700	3.24434	160700	9.58093	160700	2.44098	160700	3.10363	160700	5.60963	160700	6.01045	160700	5.35637	160700	4.57009	160700	9.91899	160700	1.86807	160700	3.35787	160700	2.15062	160700	2.75426
160800	2.70273	160800	2.27057	160800	2.16416	160800	3.31782	160800	9.4411	160800	2.40233	160800	3.2152	160800	5.59242	160800	6.09969	160800	5.40014	160800	4.57988	160800	9.87326	160800	1.95401	160800	3.29796	160800	2.18164	160800	2.75328
160900	2.66532	160900	2.25285	160900	2.1762	160900	3.35503	160900	9.49467	160900	2.43488	160900	3.1695	160900	5.51497	160900	5.9917	160900	5.20868	160900	4.72186	160900	9.84854	160900	1.95015	160900	3.3585	160900	2.13714	160900	2.859
161000	2.67196	161000	2.2828	161000	2.2235	161000	3.3729	161000	9.61799	161000	2.43345	161000	3.08104	161000	5.5328	161000	5.93551	161000	5.24385	161000	4.80016	161000	9.86594	161000	1.90461	161000	3.36021	161000	2.13044	161000	2.84664
161100	2.5628	161100	2.27126	161100	2.22462	161100	3.2975	161100	9.78781	161100	2.37553	161100	3.0372	161100	5.23416	161100	5.9394	161100	5.21185	161100	4.65069	161100	9.79832	161100	1.89746	161100	3.34247	161100	2.20219	161100	2.82746
161200	2.57896	161200	2.26887	161200	2.23579	161200	3.33618	161200	9.79277	161200	2.35853	161200	3.08319	161200	5.17504	161200	6.08549	161200	5.14065	161200	4.75909	161200	9.81751	161200	1.84797	161200	3.35848	161200	2.18414	161200	2.87197
161300	2.54567	161300	2.24101	161300	2.18652	161300	3.35632	161300	9.91777	161300	2.38537	161300	3.02832	161300	5.21749	161300	6.03289	161300	5.1455	161300	4.80271	161300	10.0242	161300	1.88565	161300	3.3342	161300	2.17491	161300	2.90944
161400	2.62141	161400	2.19419	161400	2.14594	161400	3.41594	161400	9.99511	161400	2.38575	161400	2.96235	161400	5.03809	161400	6.06489	161400	5.16784	161400	4.73011	161400	10.0042	161400	1.87039	161400	3.28887	161400	2.18163	161400	2.7993
161500	2.6178	161500	2.19385	161500	2.24546	161500	3.30802	161500	10.1295	161500	2.38221	161500	3.01411	161500	4.95738	161500	6.02051	161500	5.21708	161500	4.69547	161500	10.1283	161500	1.84165	161500	3.34893	161500	2.18066	161500	2.85421
161600	2.63583	161600	2.22877	161600	2.17174	161600	3.26789	161600	10.08	161600	2.37626	161600	2.96885	161600	4.94727	161600	6.02816	161600	5.13558	161600	4.71914	161600	10.0936	161600	1.89399	161600	3.36723	161600	2.18318	161600	2.85691
161700	2.59445	161700	2.27168	161700	2.12386	161700	3.26731	161700	10.2538	161700	2.35841	161700	3.00691	161700	5.12067	161700	6.04014	161700	5.18511	161700	4.75468	161700	10.0617	161700	1.87325	161700	3.29856	161700	2.17109	161700	2.85437
161800	2.58788	161800	2.28157	161800	2.18962	161800	3.28708	161800	10.3829	161800	2.36243	161800	3.0056	161800	5.19166	161800	6.00953	161800	5.24656	161800	4.77675	161800	10.2382	161800	1.87759	161800	3.29699	161800	2.12405	161800	2.87045
161900	2.56295	161900	2.21939	161900	2.17443	161900	3.27945	161900	10.1164	161900	2.4191	161900	2.97729	161900	5.27309	161900	6.20942	161900	5.32538	161900	4.74184	161900	10.1916	161900	1.89105	161900	3.25644	161900	2.10157	161900	2.68143
162000	2.6035	162000	2.30609	162000	2.10681	162000	3.37934	162000	10.1451	162000	2.45706	162000	2.99923	162000	5.27936	162000	6.21209	162000	5.1868	162000	4.67604	162000	10.1339	162000	1.95592	162000	3.24213	162000	2.14286	162000	2.76527
162100	2.60798	162100	2.25978	162100	2.07489	162100	3.30756	162100	10.1591	162100	2.47053	162100	3.00951	162100	5.41961	162100	5.95979	162100	5.41042	162100	4.69395	162100	10.1666	162100	1.95515	162100	3.22972	162100	2.10161	162100	2.75577
162200	2.63063	162200	2.26488	162200	2.14964	162200	3.31364	162200	10.1488	162200	2.4365	162200	3.005	162200	5.50278	162200	6.0092	162200	5.51739	162200	4.72325	162200	10.2067	162200	1.93283	162200	3.29222	162200	2.20684	162200	2.73538
162300	2.57776	162300	2.24597	162300	2.21556	162300	3.30877	162300	10.085	162300	2.40408	162300	2.98995	162300	5.56325	162300	5.96658	162300	5.55853	162300	4.76898	162300	10.2142	162300	1.90738	162300	3.28265	162300	2.21202	162300	2.72229
162400	2.65712	162400	2.10303	162400	2.2161	162400	3.35139	162400	10.0423	162400	2.33395	162400	2.94805	162400	5.53528	162400	5.96002	162400	5.59628	162400	4.80217	162400	10.3671	162400	1.92271	162400	3.29192	162400	2.17892	162400	2.69078
162500	2.65253	162500	2.10257	162500	2.23163	162500	3.29171	162500	10.1141	162500	2.32002	162500	2.94334	162500	5.44286	162500	5.84031	162500	5.48271	162500	4.90012	162500	10.1827	162500	1.93903	162500	3.27704	162500	2.12053	162500	2.81292
162600	2.55104	162600	2.12734	162600	2.29202	162600	3.2251	162600	10.0926	162600	2.37945	162600	3.05551	162600	5.5868	162600	5.84966	162600	5.56689	162600	4.96054	162600	10.2729	162600	1.97832	162600	3.31558	162600	2.13323	162600	2.74646
162700	2.63346	162700	2.13879	162700	2.22939	162700	3.26079	162700	9.94459	162700	2.32329	162700	3.01784	162700	5.6989	162700	5.89274	162700	5.37565	162700	4.95805	162700	10.3352	162700	1.98213	162700	3.32623	162700	2.1791	162700	2.84381
162800	2.60228	162800	2.12058	162800	2.27796	162800	3.23866	162800	10.0554	162800	2.43489	162800	3.01966	162800	5.66511	162800	5.92866	162800	5.3822	162800	4.92118	162800	10.4986	162800	1.98404	162800	3.34119	162800	2.14578	162800	2.90239
162900	2.67508	162900	2.14549	162900	2.24728	162900	3.23546	162900	10.0243	162900	2.46385	162900	3.10071	162900	5.71349	162900	5.89927	162900	5.32547	162900	4.87298	162900	10.5578	162900	1.94446	162900	3.36733	162900	2.14654	162900	2.89814
163000	2.6296	163000	2.17229	163000	2.30297	163000	3.2675	163000	10.1764	163000	2.40694	163000	3.11252	163000	5.5908	163000	5.89369	163000	5.36809	163000	4.90997	163000	10.51	163000	1.99351	163000	3.37628	163000	2.19008	163000	2.93062
163100	2.67192	163100	2.22337	163100	2.29355	163100	3.29474	163100	10.099	163100	2.47177	163100	3.05681	163100	5.43197	163100	5.81667	163100	5.3036	163100	4.94023	163100	10.6647	163100	1.96685	163100	3.415	163100	2.18403	163100	2.86248
163200	2.70313	163200	2.23722	163200	2.26557	163200	3.25047	163200	10.1049	163200	2.51119	163200	2.98808	163200	5.42647	163200	5.8686	163200	5.33518	163200	5.02329	163200	10.5516	163200	2.03781	163200	3.37817	163200	2.16499	163200	2.94574
163300	2.6657	163300	2.21945	163300	2.28394	163300	3.30419	163300	10.0373	163300	2.51068	163300	3.03916	163300	5.44683	163300	6.00218	163300	5.28697	163300	5.01279	163300	10.7611	163300	2.01805	163300	3.36427	163300	2.15671	163300	2.90192
163400	2.70838	163400	2.26298	163400	2.27396	163400	3.19735	163400	9.87486	163400	2.50294	163400	3.10398	163400	5.3126	163400	6.01015	163400	5.12633	163400	4.90025	163400	10.7354	163400	2.02389	163400	3.3771	163400	2.16498	163400	2.90135
163500	2.63886	163500	2.30695	163500	2.21706	163500	3.25075	163500	10.0634	163500	2.48205	163500	3.11705	163500	5.26552	163500	5.8864	163500	5.18009	163500	4.84257	163500	10.6521	163500	1.95843	163500	3.378	163500	2.22742	163500	2.95092
163600	2.58789	163600	2.22447	163600	2.26795	163600	3.20379	163600	10.0582	163600	2.4212	163600	3.22554	163600	5.27923	163600	5.93595	163600	5.22128	163600	4.94047	163600	10.7126	163600	2.00341	163600	3.40265	163600	2.21674	163600	3.00931
163700	2.62702	163700	2.22611	163700	2.2425	163700	3.22821	163700	10.067	163700	2.39148	163700	3.17192	163700	5.36188	163700	5.95924	163700	5.15422	163700	4.90799	163700	10.7721	163700	2.03567	163700	3.40332	163700	2.20626	163700	3.0075
163800	2.62909	163800	2.26486	163800	2.3494	163800	3.19562	163800	10.2341	163800	2.43811	163800	3.13315	163800	5.51783	163800	6.13966	163800	5.02427	163800	4.96162	163800	10.8461	163800	1.99274	163800	3.38183	163800	2.25415	163800	2.96441
163900	2.64567	163900	2.21642	163900	2.33191	163900	3.22159	163900	10.0348	163900	2.47756	163900	3.17338	163900	5.50204	163900	6.13776	163900	5.05641	163900	5.0567	163900	10.9606	163900	2.01862	163900	3.33591	163900	2.25173	163900	3.00256
164000	2.63152	164000	2.16757	164000	2.32918	164000	3.20519	164000	9.788	164000	2.41334	164000	3.1741	164000	5.42962	164000	6.11763	164000	4.97711	164000	5.05198	164000	10.7795	164000	1.97805	164000	3.35804	164000	2.26014	164000	2.86869
164100	2.64956	164100	2.17231	164100	2.32083	164100	3.18933	164100	9.79842	164100	2.45774	164100	3.14045	164100	5.44289	164100	6.29572	164100	5.01162	164100	5.02223	164100	10.7755	164100	1.95262	164100	3.31181	164100	2.20408	164100	2.96273
164200	2.6472	164200	2.11393	164200	2.3603	164200	3.2256	164200	9.88818	164200	2.43981	164200	3.17444	164200	5.24169	164200	6.3385	164200	5.05273	164200	5.05553	164200	10.6939	164200	1.96768	164200	3.32344	164200	2.25323	164200	2.85035
164300	2.68499	164300	2.1404	164300	2.34402	164300	3.24434	164300	9.68561	164300	2.38765	164300	3.08409	164300	5.2939	164300	6.18198	164300	5.15014	164300	4.95908	164300	10.5046	164300	1.99746	164300	3.40193	164300	2.21642	164300	2.82484
164400	2.63201	164400	2.1335	164400	2.325	164400	3.18556	164400	9.42403	164400	2.33133	164400	3.08527	164400	5.24606	164400	6.17591	164400	5.20561	164400	4.94605	164400	10.6234	164400	2.05822	164400	3.36207	164400	2.26904	164400	2.87646
164500	2.62289	164500	2.15262	164500	2.31056	164500	3.22836	164500	9.32734	164500	2.35894	164500	3.03672	164500	5.33365	164500	6.06075	164500	5.2506	164500	4.87583	164500	10.5169	164500	2.03813	164500	3.38992	164500	2.23216	164500	2.8029
164600	2.64867	164600	2.15238	164600	2.30831	164600	3.29539	164600	9.30347	164600	2.41474	164600	2.8626	164600	5.4195	164600	6.09993	164600	5.24411	164600	4.85299	164600	10.5243	164600	1.95826	164600	3.35894	164600	2.20512	164600	2.78895
164700	2.69116	164700	2.1405	164700	2.25268	164700	3.3205	164700	9.03192	164700	2.42378	164700	2.83843	164700	5.72238	164700	6.18368	164700	5.27427	164700	4.86428	164700	10.8312	164700	1.96324	164700	3.39611	164700	2.21533	164700	2.86719
164800	2.71785	164800	2.12754	164800	2.26527	164800	3.28107	164800	8.97492	164800	2.47232	164800	2.83936	164800	5.84981	164800	6.25358	164800	5.27669	164800	4.95289	164800	10.9128	164800	1.98057	164800	3.42513	164800	2.21407	164800	2.76425
164900	2.7051	164900	2.09983	164900	2.31154	164900	3.26789	164900	9.17929	164900	2.5223	164900	2.87306	164900	6.07027	164900	6.31719	164900	5.35262	164900	5.07276	164900	10.8221	164900	1.99307	164900	3.44633	164900	2.20111	164900	2.81738
165000	2.6992	165000	2.11199	165000	2.22112	165000	3.28416	165000	9.14303	165000	2.49772	165000	2.90594	165000	6.01629	165000	6.1465	165000	5.38887	165000	5.02542	165000	10.7899	165000	2.01191	165000	3.52829	165000	2.25126	165000	2.87645
165100	2.61261	165100	2.08553	165100	2.24503	165100	3.28787	165100	9.33397	165100	2.49229	165100	2.91367	165100	5.97607	165100	6.14698	165100	5.34092	165100	5.01227	165100	10.8222	165100	1.96868	165100	3.51966	165100	2.23447	165100	2.82343
165200	2.68573	165200	2.13375	165200	2.22694	165200	3.24369	165200	9.15682	165200	2.43908	165200	2.95309	165200	6.12527	165200	6.12891	165200	5.24156	165200	4.97229	165200	10.9833	165200	1.9499	165200	3.48994	165200	2.27875	165200	2.80993
165300	2.70542	165300	2.07019	165300	2.17235	165300	3.21149	165300	9.3709	165300	2.49786	165300	2.94701	165300	6.09446	165300	6.04312	165300	5.20802	165300	4.97031	165300	10.8873	165300	1.96916	165300	3.48514	165300	2.26339	165300	2.82215
165400	2.66733	165400	2.06463	165400	2.23365	165400	3.24237	165400	9.50369	165400	2.46199	165400	3.02667	165400	6.00782	165400	5.80274	165400	5.36684	165400	4.99725	165400	10.7239	165400	1.94171	165400	3.46911	165400	2.27371	165400	2.80256
165500	2.67252	165500	2.08937	165500	2.25539	165500	3.18239	165500	9.58841	165500	2.44551	165500	2.9968	165500	6.05695	165500	5.57956	165500	5.33199	165500	5.0042	165500	10.7623	165500	1.96057	165500	3.52882	165500	2.23151	165500	2.77731
165600	2.67332	165600	2.10419	165600	2.29633	165600	3.28265	165600	9.4936	165600	2.49398	165600	3.00167	165600	5.88057	165600	5.65046	165600	5.14643	165600	4.9349	165600	10.9982	165600	2.08497	165600	3.62082	165600	2.23402	165600	2.83763
165700	2.6583	165700	2.09911	165700	2.31138	165700	3.31103	165700	9.58368	165700	2.48922	165700	2.92974	165700	5.84799	165700	5.64441	165700	5.15034	165700	4.90103	165700	11.0206	165700	2.04986	165700	3.53182	165700	2.27355	165700	2.75818
165800	2.66826	165800	2.13317	165800	2.3013	165800	3.26528	165800	9.76982	165800	2.43629	165800	2.85126	165800	5.64249	165800	5.60788	165800	5.10091	165800	4.87318	165800	10.9515	165800	2.0139	165800	3.56025	165800	2.29896	165800	2.76079
165900	2.6092	165900	2.18725	165900	2.22754	165900	3.25762	165900	9.97797	165900	2.37316	165900	2.86797	165900	5.77991	165900	5.6045	165900	5.07791	165900	4.78527	165900	11.0975	165900	2.0298	165900	3.57548	165900	2.25358	165900	2.74881
166000	2.67925	166000	2.13786	166000	2.23353	166000	3.22678	166000	10.0713	166000	2.42285	166000	2.96322	166000	5.76174	166000	5.52332	166000	5.16318	166000	4.8739	166000	10.9744	166000	2.01653	166000	3.64438	166000	2.27957	166000	2.71776
166100	2.70384	166100	2.15029	166100	2.22363	166100	3.27052	166100	9.95203	166100	2.41455	166100	2.93165	166100	5.82868	166100	5.60592	166100	5.23446	166100	4.95045	166100	10.9613	166100	1.9888	166100	3.60569	166100	2.26301	166100	2.92248
166200	2.64193	166200	2.11339	166200	2.24125	166200	3.12363	166200	9.73418	166200	2.4462	166200	2.87211	166200	5.77142	166200	5.61045	166200	5.13054	166200	4.84495	166200	10.9014	166200	1.9462	166200	3.57128	166200	2.27984	166200	2.86139
166300	2.61993	166300	2.10797	166300	2.25673	166300	3.11747	166300	9.63956	166300	2.37078	166300	2.7394	166300	5.84653	166300	5.58043	166300	5.09043	166300	4.79307	166300	10.9326	166300	1.97926	166300	3.5484	166300	2.27918	166300	2.85484
166400	2.6845	166400	2.14263	166400	2.2295	166400	3.09935	166400	9.44867	166400	2.4392	166400	2.72538	166400	5.82936	166400	5.46436	166400	5.11026	166400	4.8094	166400	11.0161	166400	2.08335	166400	3.48867	166400	2.25947	166400	2.90561
166500	2.69762	166500	2.23323	166500	2.21509	166500	3.19616	166500	9.72974	166500	2.47384	166500	2.76355	166500	5.86325	166500	5.54825	166500	5.02122	166500	4.81438	166500	11.0802	166500	2.11047	166500	3.47373	166500	2.1866	166500	2.80534
166600	2.69566	166600	2.17816	166600	2.19214	166600	3.26722	166600	9.65722	166600	2.42222	166600	2.76149	166600	5.79175	166600	5.6358	166600	5.10384	166600	4.80877	166600	11.0901	166600	2.14892	166600	3.42558	166600	2.1702	166600	2.80007
166700	2.67393	166700	2.19795	166700	2.1926	166700	3.14456	166700	9.6699	166700	2.44238	166700	2.77464	166700	5.67292	166700	5.70232	166700	5.15259	166700	4.87185	166700	11.1466	166700	2.13693	166700	3.417	166700	2.20189	166700	2.83959
166800	2.71352	166800	2.10253	166800	2.24144	166800	3.24682	166800	9.47434	166800	2.51379	166800	2.77533	166800	5.82286	166800	5.66765	166800	5.2169	166800	4.80806	166800	11.0924	166800	2.05871	166800	3.40986	166800	2.20525	166800	2.92535
166900	2.67151	166900	2.14271	166900	2.16655	166900	3.16908	166900	9.37983	166900	2.48605	166900	2.81747	166900	5.7878	166900	5.66091	166900	5.23964	166900	4.9454	166900	10.9217	166900	2.06335	166900	3.35944	166900	2.20565	166900	2.8646
167000	2.68847	167000	2.08283	167000	2.12904	167000	3.13268	167000	9.4362	167000	2.45833	167000	2.86214	167000	5.75195	167000	5.78816	167000	5.1939	167000	4.88511	167000	10.8199	167000	2.04462	167000	3.32006	167000	2.2542	167000	2.85744
167100	2.66679	167100	2.12375	167100	2.23384	167100	3.17648	167100	9.45984	167100	2.38517	167100	2.82202	167100	5.71992	167100	5.87432	167100	5.24893	167100	4.89903	167100	11.043	167100	2.04479	167100	3.34406	167100	2.26741	167100	2.88051
167200	2.6549	167200	2.13085	167200	2.20017	167200	3.22083	167200	9.35749	167200	2.3339	167200	2.81425	167200	5.53722	167200	5.85307	167200	5.29838	167200	4.92225	167200	11.1088	167200	2.05256	167200	3.31114	167200	2.2657	167200	2.86728
167300	2.63673	167300	2.15031	167300	2.15209	167300	3.25265	167300	9.46563	167300	2.35687	167300	2.78483	167300	5.57715	167300	5.95221	167300	5.13635	167300	4.87219	167300	11.038	167300	2.08414	167300	3.37205	167300	2.20309	167300	2.78506
167400	2.61032	167400	2.25944	167400	2.15944	167400	3.22229	167400	9.39951	167400	2.29792	167400	2.7897	167400	5.60694	167400	5.89486	167400	5.14099	167400	4.77079	167400	10.9243	167400	2.10737	167400	3.35038	167400	2.24509	167400	2.80944
167500	2.65261	167500	2.23249	167500	2.14596	167500	3.21129	167500	9.66832	167500	2.47024	167500	2.81033	167500	5.57485	167500	5.9405	167500	5.15065	167500	4.72743	167500	10.9888	167500	2.14525	167500	3.36741	167500	2.29384	167500	2.77934
167600	2.69285	167600	2.25953	167600	2.0877	167600	3.08967	167600	9.72422	167600	2.40352	167600	2.86063	167600	5.6257	167600	6.03743	167600	5.11536	167600	4.73554	167600	10.92	167600	2.14605	167600	3.42709	167600	2.29291	167600	2.81062
167700	2.663	167700	2.21495	167700	2.06974	167700	3.18569	167700	9.63806	167700	2.40794	167700	2.75576	167700	5.65024	167700	6.1084	167700	5.12267	167700	4.869	167700	10.947	167700	2.08853	167700	3.36325	167700	2.28292	167700	2.84726
167800	2.73088	167800	2.30064	167800	2.03297	167800	3.23577	167800	9.50187	167800	2.39316	167800	2.81088	167800	5.88157	167800	6.21627	167800	5.11873	167800	4.82077	167800	10.9978	167800	2.03812	167800	3.37564	167800	2.30942	167800	2.9213
167900	2.64114	167900	2.26538	167900	2.07376	167900	3.27382	167900	9.53942	167900	2.44092	167900	2.80774	167900	5.96051	167900	6.23949	167900	5.05079	167900	4.82124	167900	10.9072	167900	2.03816	167900	3.34298	167900	2.32761	167900	2.99755
168000	2.68204	168000	2.29745	168000	2.04603	168000	3.18361	168000	9.58314	168000	2.41828	168000	2.72465	168000	5.92199	168000	6.36093	168000	5.0432	168000	4.69026	168000	10.8839	168000	1.96422	168000	3.36202	168000	2.25556	168000	2.82674
168100	2.6769	168100	2.23242	168100	2.06341	168100	3.08005	168100	9.66747	168100	2.47486	168100	2.84247	168100	5.94395	168100	6.27048	168100	5.07029	168100	4.84703	168100	10.9618	168100	1.96942	168100	3.39989	168100	2.24495	168100	2.95057
168200	2.60628	168200	2.29946	168200	2.03154	168200	3.1033	168200	9.58948	168200	2.47859	168200	2.87123	168200	5.90194	168200	6.30565	168200	4.96095	168200	4.8214	168200	11.031	168200	1.9531	168200	3.28491	168200	2.26548	168200	2.90295
168300	2.65821	168300	2.19817	168300	2.05971	168300	3.11027	168300	9.65392	168300	2.49403	168300	2.94682	168300	5.9581	168300	6.28899	168300	4.9835	168300	4.90477	168300	11.0258	168300	1.96766	168300	3.33653	168300	2.23496	168300	2.94471
168400	2.6678	168400	2.15533	168400	2.05754	168400	3.09966	168400	9.49352	168400	2.45782	168400	3.01427	168400	5.8024	168400	6.22833	168400	4.99424	168400	4.93692	168400	11.034	168400	2.00901	168400	3.33634	168400	2.22535	168400	2.96313
168500	2.67322	168500	2.16389	168500	2.13042	168500	3.09327	168500	9.64499	168500	2.443	168500	3.06433	168500	5.87065	168500	6.37206	168500	5.02721	168500	4.89351	168500	10.8942	168500	2.0273	168500	3.41305	168500	2.24127	168500	2.88738
168600	2.66044	168600	2.12764	168600	2.15518	168600	3.09524	168600	9.55864	168600	2.33364	168600	3.06412	168600	5.84863	168600	6.41601	168600	5.0487	168600	4.94386	168600	10.9724	168600	1.99971	168600	3.41712	168600	2.30344	168600	2.92641
168700	2.68158	168700	2.13815	168700	2.09123	168700	3.02298	168700	9.50496	168700	2.38967	168700	3.10272	168700	5.85581	168700	6.51257	168700	5.10668	168700	5.00678	168700	10.7634	168700	2.02406	168700	3.42604	168700	2.33055	168700	2.83992
168800	2.66169	168800	2.17928	168800	2.11289	168800	3.0304	168800	9.31729	168800	2.40983	168800	3.05542	168800	5.83276	168800	6.49418	168800	5.06145	168800	5.09792	168800	10.8994	168800	2.00762	168800	3.41012	168800	2.30567	168800	2.84199
168900	2.69525	168900	2.18061	168900	2.13596	168900	3.12071	168900	9.4834	168900	2.39041	168900	2.99813	168900	5.82551	168900	6.45182	168900	5.0283	168900	5.03072	168900	10.7259	168900	1.95399	168900	3.379	168900	2.35804	168900	2.90728
169000	2.64769	169000	2.2162	169000	2.15163	169000	3.16043	169000	9.54691	169000	2.39132	169000	2.94742	169000	5.84188	169000	6.4387	169000	5.04995	169000	5.0712	169000	10.7411	169000	1.95074	169000	3.37762	169000	2.34672	169000	2.86522
169100	2.70061	169100	2.25406	169100	2.18143	169100	3.17393	169100	9.41103	169100	2.34373	169100	2.95126	169100	5.81959	169100	6.48157	169100	5.10155	169100	5.0828	169100	10.8676	169100	1.9265	169100	3.39917	169100	2.32542	169100	2.79629
169200	2.61446	169200	2.19109	169200	2.19514	169200	3.16338	169200	9.49595	169200	2.38848	169200	3.02755	169200	5.88807	169200	6.40899	169200	5.0788	169200	4.94561	169200	10.6904	169200	1.95671	169200	3.42517	169200	2.32913	169200	2.73689
169300	2.59756	169300	2.1886	169300	2.14811	169300	3.14956	169300	9.44816	169300	2.39276	169300	2.9882	169300	5.82338	169300	6.48071	169300	5.0564	169300	4.95244	169300	10.6877	169300	1.93124	169300	3.3463	169300	2.33145	169300	2.80071
169400	2.5946	169400	2.19714	169400	2.11552	169400	3.12279	169400	9.50839	169400	2.43126	169400	2.84974	169400	5.86926	169400	6.54578	169400	5.03225	169400	4.93794	169400	10.6936	169400	1.93602	169400	3.37553	169400	2.28868	169400	2.82702
169500	2.64123	169500	2.18354	169500	2.18558	169500	3.06731	169500	9.54389	169500	2.39549	169500	2.98021	169500	5.92372	169500	6.52196	169500	4.89795	169500	4.87854	169500	10.7565	169500	1.94114	169500	3.3622	169500	2.33565	169500	2.95116
169600	2.67883	169600	2.21074	169600	2.13501	169600	3.12885	169600	9.5146	169600	2.39484	169600	2.92231	169600	5.81897	169600	6.45996	169600	4.97055	169600	4.85645	169600	11.1131	169600	1.92217	169600	3.31925	169600	2.36409	169600	3.04146
169700	2.65478	169700	2.18021	169700	2.15904	169700	3.17232	169700	9.54696	169700	2.32495	169700	2.90843	169700	5.7477	169700	6.35911	169700	5.01008	169700	4.85913	169700	11.0585	169700	1.95467	169700	3.35874	169700	2.38587	169700	2.97852
169800	2.63734	169800	2.2304	169800	2.0936	169800	3.15547	169800	9.34349	169800	2.3405	169800	3.0392	169800	5.67712	169800	6.46286	169800	5.0077	169800	4.97126	169800	11.1304	169800	1.94504	169800	3.34254	169800	2.36061	169800	2.90928
169900	2.69437	169900	2.29682	169900	2.13121	169900	3.09109	169900	9.32097	169900	2.36295	169900	3.01366	169900	5.79552	169900	6.50829	169900	4.95456	169900	4.92449	169900	11.1261	169900	1.91717	169900	3.34909	169900	2.31685	169900	2.98821
170000	2.69188	170000	2.36215	170000	2.14097	170000	3.04434	170000	9.44592	170000	2.25121	170000	3.0552	170000	5.80922	170000	6.41987	170000	4.99516	170000	4.9292	170000	11.1713	170000	1.90043	170000	3.45189	170000	2.37206	170000	2.91462
170100	2.67899	170100	2.33297	170100	2.17354	170100	3.11572	170100	9.47307	170100	2.35895	170100	3.15152	170100	5.76467	170100	6.43578	170100	4.9118	170100	4.97016	170100	11.2208	170100	1.96598	170100	3.40832	170100	2.39744	170100	2.92475
170200	2.68104	170200	2.26022	170200	2.20475	170200	3.18169	170200	9.80428	170200	2.29123	170200	3.18193	170200	5.81575	170200	6.34669	170200	5.0059	170200	4.95133	170200	11.2297	170200	1.9573	170200	3.48868	170200	2.33396	170200	2.87186
170300	2.73085	170300	2.22855	170300	2.21372	170300	3.18446	170300	9.80647	170300	2.31418	170300	3.09304	170300	5.78195	170300	6.16631	170300	4.99206	170300	4.85917	170300	11.1915	170300	1.97607	170300	3.53948	170300	2.35014	170300	2.94682
170400	2.67642	170400	2.24483	170400	2.26544	170400	3.17819	170400	9.78344	170400	2.29138	170400	3.17963	170400	5.65132	170400	6.08216	170400	5.07738	170400	4.89405	170400	11.3585	170400	1.9157	170400	3.52052	170400	2.38719	170400	2.94799
170500	2.75057	170500	2.19895	170500	2.22288	170500	3.17162	170500	9.55475	170500	2.30402	170500	3.04315	170500	5.7033	170500	6.1794	170500	5.04437	170500	4.94124	170500	11.2351	170500	1.95471	170500	3.48328	170500	2.37368	170500	2.91615
170600	2.70501	170600	2.23456	170600	2.1714	170600	3.17384	170600	9.72078	170600	2.31744	170600	3.07772	170600	5.80164	170600	6.1568	170600	5.12206	170600	4.95222	170600	11.2737	170600	1.94508	170600	3.44768	170600	2.41537	170600	2.96348
170700	2.74883	170700	2.2811	170700	2.2062	170700	3.18435	170700	9.71792	170700	2.31925	170700	2.97432	170700	5.79764	170700	6.17857	170700	5.13446	170700	5.05015	170700	11.2281	170700	1.94501	170700	3.50204	170700	2.40311	170700	2.94783
170800	2.71951	170800	2.20827	170800	2.22279	170800	3.21039	170800	9.64771	170800	2.36475	170800	2.94048	170800	5.73643	170800	6.24576	170800	5.08734	170800	4.97318	170800	11.2512	170800	1.92933	170800	3.4514	170800	2.3794	170800	2.99796
170900	2.72102	170900	2.21877	170900	2.21028	170900	3.24511	170900	9.63077	170900	2.35527	170900	2.96745	170900	5.6605	170900	6.22496	170900	5.08726	170900	5.01453	170900	11.2875	170900	1.92181	170900	3.48036	170900	2.34681	170900	2.98418
171000	2.71071	171000	2.23098	171000	2.18528	171000	3.28621	171000	9.61385	171000	2.30623	171000	2.87466	171000	5.73123	171000	5.97629	171000	5.06121	171000	4.99297	171000	11.1321	171000	1.98708	171000	3.46396	171000	2.30835	171000	2.84318
171100	2.66328	171100	2.25306	171100	2.13723	171100	3.23995	171100	9.45617	171100	2.3157	171100	2.97818	171100	5.76716	171100	6.14972	171100	5.12987	171100	4.95982	171100	11.2319	171100	1.97185	171100	3.53471	171100	2.39292	171100	2.88374
171200	2.65357	171200	2.30985	171200	2.19795	171200	3.25391	171200	9.6669	171200	2.25567	171200	3.03963	171200	5.80672	171200	6.25894	171200	5.0527	171200	4.97141	171200	11.3419	171200	1.99296	171200	3.52251	171200	2.3871	171200	2.91304
171300	2.64395	171300	2.29012	171300	2.12135	171300	3.25761	171300	9.54687	171300	2.22502	171300	3.08623	171300	5.89577	171300	6.09032	171300	5.11582	171300	4.99163	171300	11.3847	171300	2.08274	171300	3.45667	171300	2.39262	171300	2.93191
171400	2.68895	171400	2.15984	171400	2.18238	171400	3.17029	171400	9.40648	171400	2.32312	171400	2.99315	171400	6.09081	171400	6.22586	171400	4.98653	171400	5.00458	171400	11.3339	171400	1.98569	171400	3.44901	171400	2.3942	171400	2.96733
171500	2.62742	171500	2.17927	171500	2.24313	171500	3.13166	171500	9.46965	171500	2.26857	171500	3.11346	171500	6.21905	171500	6.36337	171500	4.98001	171500	4.98673	171500	11.2501	171500	2.07662	171500	3.38205	171500	2.35766	171500	2.94131
171600	2.68957	171600	2.15501	171600	2.20414	171600	3.13779	171600	9.38549	171600	2.23919	171600	3.18569	171600	6.08604	171600	6.44082	171600	4.91037	171600	5.09136	171600	11.3431	171600	2.03819	171600	3.40149	171600	2.47649	171600	2.95519
171700	2.66442	171700	2.22235	171700	2.20592	171700	3.20957	171700	9.29535	171700	2.24192	171700	3.22343	171700	5.92047	171700	6.53387	171700	4.92688	171700	4.97355	171700	11.3032	171700	1.97234	171700	3.41987	171700	2.45886	171700	3.07368
171800	2.71364	171800	2.18776	171800	2.18214	171800	3.15734	171800	9.19497	171800	2.29669	171800	3.11018	171800	5.97471	171800	6.51255	171800	5.01049	171800	5.03963	171800	11.3303	171800	2.03383	171800	3.44467	171800	2.4403	171800	3.06513
171900	2.72945	171900	2.22163	171900	2.18217	171900	3.19936	171900	9.37896	171900	2.24586	171900	3.13554	171900	5.86697	171900	6.60128	171900	4.96487	171900	4.97895	171900	11.2957	171900	1.97376	171900	3.35469	171900	2.43459	171900	3.10403
172000	2.69482	172000	2.23979	172000	2.25967	172000	3.24032	172000	9.42892	172000	2.33451	172000	2.97674	172000	6.01972	172000	6.52461	172000	4.89399	172000	4.90668	172000	11.2102	172000	2.00777	172000	3.37847	172000	2.41761	172000	3.08536
172100	2.69132	172100	2.21959	172100	2.16946	172100	3.26653	172100	9.40525	172100	2.41106	172100	3.07065	172100	5.99237	172100	6.57603	172100	4.94587	172100	4.96557	172100	11.3569	172100	2.05382	172100	3.33001	172100	2.41034	172100	3.17092
172200	2.73372	172200	2.20703	172200	2.13029	172200	3.27624	172200	9.25324	172200	2.43729	172200	3.05271	172200	5.943	172200	6.52874	172200	5.0488	172200	4.99244	172200	11.3895	172200	2.08577	172200	3.36338	172200	2.42391	172200	3.17048
172300	2.71072	172300	2.19284	172300	2.17117	172300	3.27202	172300	9.40115	172300	2.37774	172300	3.00148	172300	6.09377	172300	6.62017	172300	5.10644	172300	4.92013	172300	11.3314	172300	2.08137	172300	3.35284	172300	2.41407	172300	3.16215
172400	2.70048	172400	2.19155	172400	2.17429	172400	3.30431	172400	9.49361	172400	2.41219	172400	3.14534	172400	6.06581	172400	6.57828	172400	5.05239	172400	4.83847	172400	11.1749	172400	2.0787	172400	3.4289	172400	2.37807	172400	3.12505
172500	2.75206	172500	2.19469	172500	2.17629	172500	3.25668	172500	9.4785	172500	2.31953	172500	3.11616	172500	6.07508	172500	6.64059	172500	5.03407	172500	4.87011	172500	11.2058	172500	2.09783	172500	3.39173	172500	2.35957	172500	3.05745
172600	2.61173	172600	2.15852	172600	2.14166	172600	3.35763	172600	9.21641	172600	2.37635	172600	3.24743	172600	6.10758	172600	6.55017	172600	5.12959	172600	4.91033	172600	11.1071	172600	2.12609	172600	3.41052	172600	2.4	172600	3.01237
172700	2.64782	172700	2.14717	172700	2.13636	172700	3.3342	172700	9.26965	172700	2.41611	172700	3.23073	172700	6.13767	172700	6.69994	172700	5.12884	172700	4.86832	172700	11.1515	172700	2.07061	172700	3.3726	172700	2.40381	172700	2.96689
172800	2.72754	172800	2.15562	172800	2.20032	172800	3.29889	172800	9.31288	172800	2.41492	172800	3.2721	172800	5.98094	172800	6.6092	172800	5.15062	172800	4.82005	172800	11.3797	172800	1.98358	172800	3.31816	172800	2.3804	172800	2.89383
172900	2.6861	172900	2.12831	172900	2.16905	172900	3.30686	172900	9.24304	172900	2.44334	172900	3.22322	172900	5.81073	172900	6.6648	172900	5.13707	172900	4.77486	172900	11.2277	172900	2.00816	172900	3.33874	172900	2.3299	172900	2.94631
[truncated: 8,271 more rows]
