# Supplementary material for: Discovery of a heparan sulfate binding domain in monkeypox virus H3 as an anti-poxviral drug target combining AI and MD simulations
Source: eLife. 2025 Jan 16;13:RP100545. doi: 10.7554/eLife.100545 (PMC11737874; doi:10.7554/eLife.100545)
Supplement: Figure 2—source data 2. [file elife-100545-fig2-data2.xlsx]

## Sheet: Sheet1
Extension (nm)	Force (pN)
0	2.05471e-05
-0.00463	7.85391
-0.00459	7.95973
-0.00112	2.36845
0.00102	-1.0214
0.00206	-2.58286
0.00391	-5.49609
0.00339	-4.46709
0.00537	-7.57239
0.00684	-9.84639
0.007	-9.95507
0.00514	-6.69881
0.00464	-5.71209
0.00327	-3.27085
0.00269	-2.13449
0.00095	0.921199
0.00212	-0.864792
0.00271	-1.66691
0.00289	-1.79901
0.00462	-4.50333
0.00577	-6.24479
0.00481	-4.49038
0.00366	-2.41796
0.00085	2.41128
0.00137	1.7179
0.00471	-3.66108
0.00617	-5.92366
0.00691	-6.97638
0.00799	-8.60801
0.00892	-9.99542
0.00881	-9.6328
0.008	-8.12205
0.0045	-2.15068
0.00193	2.28406
0.00332	0.145278
0.00611	-4.33081
0.00776	-6.8931
0.00901	-8.80705
0.01246	-14.3683
0.01466	-17.8614
0.01269	-14.4124
0.01216	-13.3748
0.01305	-14.6832
0.01292	-14.3098
0.01393	-15.8104
0.01307	-14.2232
0.00942	-7.99227
0.00871	-6.65036
0.0083	-5.8067
0.0113	-10.6179
0.01268	-12.7506
0.01637	-18.6941
0.02105	-26.3017
0.02545	-33.4352
0.02639	-34.8308
0.02723	-36.0731
0.02917	-39.1131
0.02832	-37.5407
0.02929	-38.9939
0.02892	-38.2104
0.02899	-38.1626
0.02942	-38.6976
0.02523	-31.5764
0.02192	-25.9304
0.021	-24.2264
0.01916	-21.0043
0.02019	-22.5498
0.02163	-24.7821
0.02432	-29.0764
0.02648	-32.5035
0.02752	-34.0574
0.02559	-30.6856
0.02369	-27.3629
0.02449	-28.5299
0.02578	-30.4965
0.02784	-33.7659
0.03183	-40.211
0.03367	-43.0996
0.03301	-41.8378
0.03364	-42.7284
0.03527	-45.2704
0.03505	-44.7377
0.03352	-42.0179
0.03392	-42.5184
0.03363	-41.8745
0.03721	-47.6452
0.03916	-50.724
0.04347	-57.7059
0.04476	-59.6835
0.04565	-61.0023
0.04754	-63.9635
0.0487	-65.73
0.04873	-65.6133
0.04887	-65.6807
0.05076	-68.6443
0.0515	-69.7142
0.05438	-74.3272
0.05645	-77.604
0.05496	-74.9636
0.05339	-72.1824
0.05385	-72.7872
0.05416	-73.1404
0.05612	-76.2187
0.05624	-76.2524
0.0582	-79.3395
0.05938	-81.1305
0.06125	-84.0695
0.06109	-83.6354
0.06214	-85.2246
0.06492	-89.6719
0.06711	-93.1283
0.06618	-91.4268
0.06516	-89.5663
0.06494	-89.0309
0.06478	-88.601
0.06548	-89.6003
0.0652	-88.9685
0.0648	-88.1322
0.06546	-89.0743
0.06315	-85.063
0.06028	-80.1368
0.05802	-76.2204
0.05809	-76.1633
0.05743	-74.9156
0.0588	-77.0228
0.06402	-85.5126
0.06988	-95.0753
0.07565	-104.488
0.0772	-106.9
0.08044	-112.117
0.08354	-117.096
0.08337	-116.65
0.08054	-111.784
0.07909	-109.199
0.07867	-108.336
0.07745	-106.151
0.07759	-106.211
0.07733	-105.624
0.08023	-110.265
0.08357	-115.644
0.0857	-119.013
0.08554	-118.582
0.08512	-117.725
0.0839	-115.526
0.07969	-108.383
0.07867	-106.517
0.07794	-105.142
0.07605	-101.831
0.07374	-97.8361
0.07402	-98.1367
0.07145	-93.7009
0.0679	-87.637
0.06531	-83.1784
0.06405	-80.9207
0.06426	-81.1056
0.0648	-81.8257
0.06104	-75.4256
0.05871	-71.3929
0.05781	-69.724
0.05715	-68.4748
0.0588	-71.0407
0.06008	-73.0046
0.05751	-68.5675
0.05616	-66.1683
0.05494	-63.9668
0.05296	-60.5244
0.05426	-62.5139
0.06069	-73.0156
0.06572	-81.1954
0.06613	-81.7233
0.06711	-83.1824
0.06611	-81.3563
0.06426	-78.1136
0.06245	-74.9367
0.05872	-68.5925
0.05808	-67.358
0.05922	-69.0814
0.06267	-74.6432
0.06544	-79.0819
0.06725	-81.917
0.06656	-80.6109
0.06678	-80.7949
0.06532	-78.2159
0.06402	-75.8929
0.06064	-70.1059
0.05992	-68.7547
0.06009	-68.8598
0.0605	-69.3883
0.06062	-69.4097
0.06	-68.2121
0.05987	-67.8316
0.05786	-64.3336
0.05891	-65.9043
0.06029	-68.0404
0.05977	-67.0112
0.06256	-71.4663
0.06673	-78.2275
0.06906	-81.9381
0.06975	-82.9042
0.07097	-84.7636
0.06969	-82.4758
0.06777	-79.1193
0.06604	-76.0829
0.06332	-71.4097
0.05939	-64.7121
0.05889	-63.7194
0.06267	-69.8374
0.06406	-71.9675
0.06343	-70.7529
0.06598	-74.8346
0.06927	-80.1207
0.07162	-83.8572
0.06748	-76.815
0.06151	-66.7411
0.05855	-61.6692
0.05416	-54.2065
0.05187	-50.2434
0.05033	-47.5183
0.05076	-48.0625
0.04968	-46.102
0.05064	-47.5387
0.05234	-50.1879
0.05574	-55.6764
0.05536	-54.8706
0.0562	-56.1088
0.05618	-55.8965
0.05479	-53.422
0.056	-55.2647
0.05647	-55.892
0.05566	-54.3788
0.05508	-53.249
0.05472	-52.4879
0.05147	-46.9284
0.0496	-43.6459
0.04937	-43.1007
0.04856	-41.5915
0.04707	-38.9622
0.0468	-38.3422
0.04632	-37.3722
0.0471	-38.5
0.04496	-34.7885
0.04299	-31.3531
0.03987	-26.0069
0.03671	-20.6009
0.03437	-16.5452
0.03526	-17.8608
0.0402	-25.8952
0.03996	-25.3316
0.03982	-24.9236
0.04189	-28.1961
0.04576	-34.4598
0.04935	-40.248
0.05147	-43.6006
0.05084	-42.3922
0.04879	-38.8163
0.05058	-41.623
0.04913	-39.0528
0.04759	-36.3332
0.04786	-36.612
0.04677	-34.6432
0.04678	-34.4965
0.04678	-34.324
0.04852	-37.0424
0.05081	-40.673
0.05192	-42.3594
0.05202	-42.3577
0.05123	-40.8747
0.05094	-40.2261
0.0515	-40.9942
0.05232	-42.198
0.05299	-43.1439
0.05208	-41.4658
0.05171	-40.6745
0.05285	-42.4147
0.05117	-39.4572
0.05145	-39.7537
0.04999	-37.1692
0.04896	-35.2775
0.04821	-33.8779
0.04803	-33.4027
0.04587	-29.6531
0.04481	-27.7326
0.04431	-26.7428
0.04365	-25.4669
0.04351	-25.0811
0.04601	-29.0576
0.04798	-32.1647
0.04772	-31.5621
0.04753	-31.0835
0.04749	-30.8552
0.04715	-30.1244
0.04569	-27.5391
0.04261	-22.2599
0.0413	-19.9145
0.03957	-16.8817
0.03597	-10.7412
0.03385	-7.05467
0.03114	-2.38336
0.03128	-2.4523
0.03303	-5.18889
0.03141	-2.32671
0.03128	-1.95581
0.03215	-3.23071
0.03236	-3.41817
0.03073	-0.536353
0.02981	1.15493
0.02929	2.1881
0.03122	-0.860099
0.03329	-4.12495
0.03463	-6.18264
0.03485	-6.387
0.03535	-7.04982
0.03466	-5.7319
0.03364	-3.88067
0.03133	0.123381
0.02854	4.9272
0.02708	7.5031
0.02614	9.23777
0.0254	10.635
0.02606	9.70768
0.02772	7.11247
0.03186	0.405259
0.03467	-4.09485
0.0353	-4.97927
0.03539	-4.95829
0.03513	-4.36553
0.03359	-1.63201
0.03394	-2.05956
0.03312	-0.529339
0.03129	2.68246
0.02998	5.01137
0.02691	10.2796
0.02806	8.54522
0.02767	9.35646
0.0229	17.4431
0.01806	25.6347
0.01472	31.3405
0.01475	31.4572
0.01749	27.0792
0.019	24.7337
0.01806	26.4682
0.01671	28.872
0.01543	31.1668
0.01514	31.8096
0.01715	28.6435
0.01584	30.9739
0.01801	27.5479
0.02136	22.1489
0.02453	17.059
0.02394	18.1976
0.0223	21.092
0.02155	22.4938
0.02121	23.2368
0.02261	21.0774
0.0247	17.767
0.02257	21.4746
0.02261	21.568
0.02418	19.1308
0.02355	20.3373
0.02266	21.9771
0.02216	22.9885
0.02225	23.0046
0.02211	23.3881
0.02023	26.69
0.02045	26.4899
0.0197	27.8941
0.02069	26.4156
0.02264	23.3403
0.02208	24.439
0.02174	25.1727
0.0208	26.9041
0.01836	31.1099
0.0182	31.5505
0.01769	32.5511
0.01959	29.5744
0.02214	25.4966
0.02354	23.3438
0.02344	23.6836
0.02575	20.0071
0.02603	19.7167
0.02884	15.2195
0.02769	17.2816
0.02765	17.5167
0.02816	16.8344
0.02779	17.6251
0.03037	13.494
0.03289	9.49205
0.0344	7.15183
0.03643	3.94404
0.0369	3.33424
0.0371	3.16203
0.03891	0.320476
0.04021	-1.66945
0.04318	-6.43087
0.04341	-6.65167
0.04143	-3.1988
0.03782	2.95956
0.03635	5.56729
0.03706	4.5487
0.03812	2.96527
0.04038	-0.618941
0.04154	-2.38791
0.04267	-4.08805
0.04635	-10.0336
0.04692	-10.8249
0.04526	-7.89381
0.04676	-10.2142
0.04771	-11.6282
0.04829	-12.4221
0.04914	-13.666
0.05015	-15.1845
0.05128	-16.897
0.05211	-18.104
0.05362	-20.4446
0.05541	-23.2488
0.0573	-26.2185
0.05738	-26.1848
0.05994	-30.2664
0.06036	-30.7985
0.06036	-30.6356
0.05663	-24.285
0.05308	-18.2213
0.05087	-14.3908
0.0497	-12.2832
0.04778	-8.92124
0.05033	-12.9918
0.05088	-13.732
0.05359	-18.0754
0.05527	-20.6878
0.05365	-17.8384
0.05625	-21.984
0.05738	-23.6953
0.05896	-26.1483
0.05755	-23.6455
0.05743	-23.2906
0.05738	-23.038
0.05761	-23.2526
0.05624	-20.8023
0.05732	-22.4301
0.0584	-24.0665
0.05837	-23.8499
0.05714	-21.6323
0.05876	-24.1703
0.06151	-28.5654
0.06446	-33.2876
0.06782	-38.6974
0.06843	-39.5556
0.06863	-39.7132
0.06854	-39.4057
0.06816	-38.605
0.06635	-35.4383
0.06511	-33.2056
0.06329	-30.0291
0.0582	-21.4132
0.05251	-11.7915
0.05364	-13.5039
0.05643	-17.968
0.05399	-13.748
0.0547	-14.7712
0.05516	-15.3695
0.05616	-16.8558
0.05824	-20.1444
0.06192	-26.0836
0.06506	-31.1316
0.06717	-34.4644
0.06724	-34.4171
0.0654	-31.1999
0.06372	-28.2547
0.06412	-28.7407
0.06382	-28.0757
0.06187	-24.685
0.05847	-18.8715
0.05661	-15.614
0.053	-9.45536
0.05118	-6.27487
0.05072	-5.34316
0.0495	-3.14537
0.04808	-0.630415
0.04695	1.41679
0.04611	2.9832
0.04582	3.61795
0.04602	3.45529
0.04361	7.62811
0.04208	10.3345
0.04147	11.5134
0.04135	11.8799
0.04363	8.2632
0.04662	3.46166
0.04984	-1.72642
0.0512	-3.80542
0.04912	-0.190012
0.04719	3.17636
0.0489	0.500042
0.04911	0.327993
0.04941	-0.0037308
0.05031	-1.34279
0.04995	-0.579574
0.04868	1.69111
0.04642	5.6141
0.04503	8.08281
0.04248	12.4818
0.04099	15.1318
0.03931	18.0782
0.03783	20.7097
0.0358	24.2466
0.03387	27.6174
0.03073	32.997
0.02749	38.5283
0.02518	42.529
0.02523	42.614
0.02464	43.7694
0.02323	46.2677
0.0236	45.8221
0.02361	45.9783
0.02399	45.4991
0.02768	39.5488
0.02784	39.4434
0.0262	42.334
0.02721	40.826
0.02591	43.1535
0.02706	41.4094
0.02785	40.2591
0.02754	40.9359
0.02731	41.4975
0.02676	42.5606
0.0275	41.5071
0.0305	36.6945
0.02922	38.9907
0.02672	43.3051
0.0243	47.4793
0.02275	50.2235
0.02236	51.0329
0.02126	53.0342
0.01736	59.6742
0.01517	63.4747
0.01478	64.2893
0.01601	62.4075
0.01768	59.8012
0.01941	57.0857
0.01806	59.5027
0.01517	64.4668
0.01288	68.4274
0.01125	71.3016
0.01009	73.3987
0.00519	81.7014
0.00196	87.2287
0.00055	89.7343
0.00028	90.3435
0.00086	89.5382
-0.00015	91.3888
-0.0013	93.4651
-0.00136	93.7259
0.0008	90.3032
0.00194	88.5914
0.00031	91.4615
-0.0013	94.2928
-0.00187	95.4136
-0.00495	100.681
-0.00593	102.483
-0.00739	105.073
-0.0063	103.418
-0.00321	98.4586
-0.00363	99.3311
-0.0035	99.2733
-0.00657	104.539
-0.00988	110.189
-0.01079	111.871
-0.01281	115.393
-0.01387	117.319
-0.01535	119.941
-0.02115	129.729
-0.0211	129.826
-0.01771	124.353
-0.01367	117.81
-0.01297	116.817
-0.0153	120.85
-0.01567	121.64
-0.01457	119.968
-0.01818	126.14
-0.01921	128.011
-0.0143	120.027
-0.00996	112.984
-0.00698	108.213
-0.00664	107.8
-0.0065	107.737
-0.00583	106.801
-0.00505	105.659
-0.00667	108.514
-0.00508	106.044
-0.00324	103.158
-0.0023	101.768
-0.00288	102.894
-0.00186	101.362
-0.00208	101.89
-0.00141	100.948
-0.00102	100.464
-0.00222	102.624
-0.00087	100.551
0.00067	98.1553
0.00395	92.8856
0.00916	84.4
0.0144	75.8617
0.02033	66.1847
0.02624	56.5499
0.02954	51.2296
0.0298	50.9711
0.02955	51.5541
0.02887	52.8388
0.02884	53.0543
0.02812	54.4193
0.02463	60.3868
0.02295	63.336
0.02184	65.3389
0.0178	72.2238
0.01771	72.5237
0.01848	71.414
0.01853	71.5073
0.01697	74.2511
0.01851	71.8642
0.02062	68.5361
0.02096	68.139
0.02279	65.2591
0.02288	65.2782
0.02246	66.1415
0.02127	68.2841
0.01976	70.9584
0.01785	74.2976
0.0192	72.2196
0.0178	74.7105
0.01909	72.7259
0.02023	71.0098
0.02215	67.9895
0.02567	62.3081
0.02749	59.4502
0.02942	56.4139
0.03172	52.7558
0.03439	48.4889
0.03856	41.7362
0.04136	37.26
0.04028	39.2124
0.03871	41.9938
0.03488	48.5185
0.03207	53.3395
0.03086	55.5147
0.02996	57.1784
0.03005	57.194
0.03127	55.3364
0.03164	54.8844
0.03056	56.8372
0.02915	59.3501
0.02701	63.0687
0.02477	66.9524
0.02419	68.0869
0.02578	65.6014
0.02717	63.4646
0.02983	59.2104
0.03018	58.8115
0.02866	61.4984
0.02915	60.8402
0.0304	58.9365
0.02895	61.5062
0.02786	63.4799
0.02681	65.3984
0.02426	69.7952
0.02032	76.5028
0.01898	78.8902
0.0199	77.5222
0.0218	74.5451
0.02151	75.1899
0.02169	75.0478
0.02658	67.1101
0.02913	63.0418
0.02768	65.6127
0.02602	68.5303
0.02427	71.6099
0.02616	68.6256
0.02775	66.1633
0.02787	66.1258
0.02684	67.9939
0.02434	72.3159
0.0228	75.0327
0.02401	73.2009
0.0278	67.0667
0.02947	64.4606
0.02973	64.1962
0.03197	60.6441
0.03574	54.5481
0.03578	54.6462
0.0343	57.2758
0.03343	58.8885
0.0317	61.921
0.03164	62.1931
0.03125	62.9962
0.02679	70.5807
0.02469	74.2259
0.02522	73.5041
0.02618	72.0888
0.02528	73.7453
0.02317	77.4181
0.02458	75.2402
0.02622	72.6863
0.02949	67.4207
0.03203	63.3599
0.03541	57.9191
0.03698	55.4853
0.03847	53.168
0.0382	53.7973
0.03657	56.6604
0.03683	56.3988
0.04025	50.877
0.0443	44.3354
0.04681	40.33
0.0475	39.3445
0.04809	38.5369
0.04982	35.8268
0.04957	36.4066
0.04847	38.4089
0.04967	36.5804
0.05425	29.1378
0.05656	25.4692
0.05674	25.3366
0.05782	23.7068
0.05741	24.5637
0.05577	27.4499
0.05641	26.5568
0.05438	30.0779
0.05374	31.3172
0.05375	31.4688
0.05612	27.6976
0.06049	20.5988
0.06153	19.0507
0.06017	21.4751
0.06098	20.2957
0.06229	18.2816
0.06194	19.0347
0.05882	24.3811
0.05858	24.9457
0.05784	26.3379
0.05658	28.589
0.05697	28.1083
0.05573	30.3363
0.05502	31.6755
0.05858	25.9405
0.05919	25.0941
0.06041	23.2284
0.06113	22.2032
0.06018	23.9384
0.06145	22.0081
0.06068	23.4432
0.05998	24.7667
0.05994	25.0052
0.06242	21.0478
0.06714	13.3873
0.07148	6.35446
0.0725	4.81596
0.07479	1.17641
0.0783	-4.47616
0.08253	-11.3306
0.08432	-14.145
0.08508	-15.2342
0.08566	-16.0322
0.08581	-16.1149
0.08503	-14.6507
0.08507	-14.5472
0.08182	-8.9884
0.07846	-3.25355
0.0751	2.50023
0.07236	7.20259
0.06816	14.3463
0.06623	17.7253
0.06322	22.877
0.06378	22.118
0.06596	18.6571
0.06692	17.2378
0.06701	17.2615
0.0685	14.9448
0.06985	12.8654
0.06741	17.0829
0.06572	20.0568
0.06547	20.6436
0.06385	23.4893
0.06243	26.022
0.06281	25.5477
0.06397	23.7993
0.06491	22.3944
0.06635	20.1798
0.06688	19.4662
0.0678	18.0983
0.06523	22.5294
0.06698	19.7865
0.06765	18.8541
0.06709	19.9457
0.06588	22.1163
0.0654	23.0805
0.06657	21.3069
0.06649	21.6102
0.06727	20.4751
0.06737	20.4807
0.06626	22.4744
0.06917	17.8203
0.07	16.5981
0.06978	17.145
0.06998	16.9695
0.07086	15.6736
0.0714	14.9462
0.07165	14.7041
0.07148	15.1514
0.07079	16.4532
0.06951	18.7482
0.06678	23.4495
0.06758	22.2817
0.06707	23.3024
0.0668	23.9063
0.06729	23.2589
0.06795	22.3338
0.06568	26.2639
0.06578	26.2665
0.06631	25.5595
0.06912	21.0544
0.07027	19.3075
0.06772	23.7109
0.06502	28.3652
0.06411	30.0352
0.06602	27.0298
0.06858	22.955
0.07077	19.4763
0.07651	10.113
0.08023	4.1003
0.0837	-1.4956
0.08582	-4.83319
0.08253	0.790268
0.07999	5.16977
0.08314	0.0989111
0.08591	-4.32571
0.08591	-4.15533
0.08339	0.184041
0.08125	3.90552
0.08063	5.09864
0.07973	6.76579
0.0806	5.47951
0.0795	7.46861
0.07954	7.5684
0.08066	5.88327
0.08031	6.63132
0.0828	2.65771
0.08153	4.93128
0.08081	6.30068
0.07834	10.5655
0.07386	18.1592
0.073	19.7532
0.07195	21.6728
0.06911	26.5461
0.06605	31.7918
0.06491	33.8452
0.06458	34.5753
0.06699	30.7392
0.06761	29.8702
0.06655	31.7895
0.06388	36.3884
0.06031	42.4885
0.05781	46.8012
0.05956	44.0632
0.06394	36.9617
0.06858	29.4208
0.07076	25.9709
0.07123	25.3543
0.06961	28.212
0.06971	28.2084
0.07193	24.6942
0.07044	27.3311
0.06832	31.0154
0.06768	32.242
0.0665	34.3612
0.06798	32.0725
0.07086	27.4551
0.07139	26.7489
0.07333	23.6872
0.07327	23.9599
0.07113	27.677
0.06849	32.2238
0.06651	35.6802
0.06477	38.7381
0.06599	36.8731
0.06794	33.8024
0.07087	29.1071
0.06981	31.0367
0.06986	31.1149
0.06902	32.6763
0.06933	32.3232
0.07344	25.6631
0.07357	25.6123
0.07308	26.601
0.07441	24.5637
0.07278	27.4217
0.07347	26.4524
0.07481	24.3997
0.07405	25.8201
0.07123	30.668
0.06736	37.2536
0.06466	41.9069
0.06464	42.1018
0.0644	42.6643
0.06785	37.1086
0.07115	31.7885
0.07328	28.4272
0.07267	29.5981
0.07418	27.2657
0.0742	27.3895
0.07257	30.2661
0.07135	32.4563
0.07028	34.405
0.06988	35.2385
0.07021	34.8565
0.07196	32.1173
0.07341	29.87
0.07329	30.2366
0.07476	27.9539
0.0797	19.9285
0.08355	13.7083
0.08345	14.0377
0.08404	13.2224
0.08656	9.1998
0.08781	7.29289
0.0892	5.15986
0.08823	6.93257
0.08475	12.8737
0.08234	17.0431
0.08026	20.6489
0.08063	20.2057
0.08011	21.2334
0.07718	26.273
0.07628	27.9199
0.07914	23.3379
0.08187	18.9834
0.08259	17.9567
0.08272	17.8951
0.08403	15.8934
0.08581	13.107
0.08617	12.6768
0.08426	16.0129
0.08123	21.196
0.07671	28.8729
0.07799	26.9212
0.07694	28.8163
0.07558	31.2455
0.07597	30.7586
0.07497	32.5976
0.07387	34.5758
0.07306	36.1002
0.07105	39.589
0.06864	43.7564
0.06808	44.8653
0.07111	39.9964
0.07388	35.5645
0.07409	35.3753
0.07539	33.3911
0.07578	32.9057
0.0771	30.8748
0.07776	29.9565
0.07678	31.7515
0.07649	32.4007
0.07747	30.9346
0.0778	30.5493
0.07889	28.9011
0.07977	27.6045
0.07986	27.6305
0.07792	31.0149
0.07445	36.9362
0.07295	39.6053
0.07334	39.1157
0.0736	38.8468
0.0718	42.0081
0.06965	45.7348
0.07159	42.6889
0.07144	43.0943
0.06766	49.5337
0.06687	51.0254
0.06514	54.0579
0.0617	59.9292
0.06164	60.1904
0.06142	60.7336
0.06159	60.6207
0.06544	54.3853
0.06584	53.8926
0.06487	55.659
0.0648	55.9442
0.06461	56.4299
0.06684	52.8976
0.06756	51.8649
0.07116	46.0547
0.07195	44.9015
0.07061	47.3014
0.07065	47.3928
0.07214	45.0888
0.07102	47.109
0.06992	49.1065
0.0728	44.4978
0.07266	44.8959
0.07122	47.4491
0.07399	43.0161
0.077	38.179
0.07395	43.4078
0.07093	48.5907
0.07167	47.5299
0.0721	46.9828
0.07532	41.8034
0.07538	41.869
0.07806	37.5967
0.07873	36.648
0.07873	36.8163
0.07907	36.4046
0.07872	37.1525
0.07886	37.0842
0.07731	39.8274
0.07409	45.3449
0.06995	52.3771
0.06767	56.3333
0.06673	58.0509
0.06573	59.8742
0.06651	58.7595
0.06841	55.7675
0.06794	56.7119
0.06867	55.6648
0.06992	53.7578
0.06596	60.4889
0.06336	64.9707
0.0589	72.5538
0.05546	78.43
0.05721	75.691
0.05816	74.2689
0.06013	71.1722
0.06258	67.2688
0.06106	69.9662
0.05785	75.4457
0.05734	76.4584
0.05561	79.4976
0.055	80.6893
0.05465	81.4305
0.05471	81.4989
0.05402	82.8128
0.05488	81.5399
0.05251	85.6389
0.05011	89.7879
0.05015	89.8878
0.05147	87.8651
0.05344	84.7578
0.05362	84.6309
0.05322	85.4583
0.05649	80.1946
0.05565	81.7545
0.05363	85.2732
0.05385	85.0785
0.05473	83.7845
0.05788	78.7257
0.05967	75.9179
0.0639	69.0608
0.06724	63.6905
0.06838	61.9592
0.06817	62.4786
0.06876	61.6506
0.06921	61.0717
0.06656	65.6394
0.06374	70.4909
0.06222	73.1779
0.0624	73.0423
0.06395	70.6388
0.06384	70.9926
0.06036	76.9339
0.0544	86.99
0.04997	94.5128
0.05076	93.3659
0.04999	94.8144
0.04925	96.208
0.04833	97.8894
0.04729	99.7879
0.04879	97.4601
0.04685	100.845
0.04559	103.102
0.04354	106.675
0.04279	108.092
0.04123	110.841
0.0415	110.569
0.0402	112.882
0.04098	111.76
0.04115	111.64
0.04235	109.817
0.04518	105.288
0.0471	102.255
0.04908	99.136
0.04994	97.8771
0.04894	99.6989
0.04671	103.579
0.04498	106.607
0.04583	105.368
0.04543	106.192
0.0475	102.925
0.04726	103.497
0.0468	104.412
0.04494	107.675
0.04065	114.955
0.03961	116.848
0.04135	114.136
0.04246	112.46
0.04173	113.833
0.03945	117.782
0.0362	123.337
0.03608	123.702
0.03674	122.787
0.03589	124.354
0.03609	124.186
0.03966	118.434
0.04178	115.074
0.04362	112.182
0.0452	109.738
0.04523	109.843
0.04462	111.034
0.04155	116.295
0.03989	119.215
0.04095	117.611
0.0447	111.557
0.04887	104.806
0.0509	101.6
0.052	99.9308
0.04977	103.798
0.05004	103.515
0.04955	104.499
0.04986	104.158
0.04869	106.255
0.04464	113.143
0.04051	120.181
0.0383	124.005
0.03647	127.219
0.03464	130.408
0.03462	130.612
0.03398	131.837
0.03391	132.119
0.03588	129.022
0.03693	127.437
0.03194	135.901
0.03058	138.325
0.02867	141.647
0.03141	137.272
0.0326	135.46
0.03231	136.103
0.03382	133.775
0.03585	130.565
0.03801	127.138
0.03891	125.815
0.03985	124.427
0.037	129.326
0.03434	133.901
0.03313	136.084
0.03255	137.199
0.03367	135.518
0.03391	135.273
0.03274	137.383
0.02889	143.941
0.02792	145.726
0.02743	146.707
0.02578	149.605
0.02624	149.006
0.02856	145.322
0.02786	146.655
0.02473	152.016
0.02358	154.086
0.02476	152.301
0.02622	150.04
0.0258	150.9
0.02617	150.454
0.02558	151.596
0.02622	150.695
0.02731	149.053
0.02826	147.639
0.03068	143.802
0.03304	140.043
0.03101	143.582
0.03179	142.442
0.03474	137.713
0.0357	136.298
0.03694	134.401
0.03705	134.383
0.0387	131.806
0.04106	128.055
0.042	126.666
0.04277	125.549
0.04183	127.279
0.04268	126.027
0.04343	124.961
0.04423	123.786
0.04244	126.926
0.04365	125.082
0.04344	125.605
0.04406	124.736
0.04266	127.229
0.04005	131.719
0.03972	132.441
0.03963	132.753
0.03516	140.34
0.03256	144.823
0.03194	146.015
0.03277	144.816
0.03413	142.724
0.03508	141.306
0.03458	142.296
0.03196	146.824
0.03318	144.963
0.03519	141.78
0.03579	140.96
0.0347	142.93
0.03651	140.1
0.03808	137.655
0.03832	137.428
0.03586	141.663
0.03449	144.117
0.03467	143.978
0.03782	138.909
0.04209	131.991
0.04319	130.328
0.04468	128.019
0.04326	130.546
0.04394	129.591
0.04181	133.292
0.04061	135.438
0.03931	137.77
0.03657	142.483
0.03519	144.948
0.03401	147.069
0.03495	145.679
0.03668	142.968
0.03808	140.81
0.04094	136.221
0.04056	137.028
0.03878	140.147
0.03641	144.244
0.03503	146.697
0.03581	145.58
0.03885	140.691
0.04034	138.387
0.04087	137.666
0.0404	138.613
0.04168	136.664
0.04263	135.247
0.04263	135.409
0.04167	137.169
0.04073	138.898
0.04064	139.214
0.04192	137.253
0.04035	140.029
0.04159	138.142
0.04113	139.06
0.04117	139.166
0.03917	142.644
0.03742	145.713
0.03839	144.272
0.0407	140.603
0.04252	137.755
0.04537	133.195
0.04884	127.589
0.04975	126.244
0.05149	123.52
0.05182	123.142
0.0499	126.5
0.04856	128.884
0.04662	132.268
0.04611	133.284
0.04998	127.026
0.05443	119.807
0.05458	119.732
0.05492	119.327
0.05455	120.111
0.05173	124.956
0.0539	121.522
0.05271	123.655
0.0549	120.195
0.05906	113.447
0.06238	108.1
0.0643	105.082
0.06535	103.509
0.06544	103.516
0.06568	103.29
0.06416	105.977
0.0684	99.1096
0.07031	96.1002
0.07059	95.7968
0.06869	99.1259
0.06758	101.14
0.06629	103.447
0.06614	103.857
0.06684	102.859
0.0653	105.584
0.06315	109.313
0.06554	105.515
0.07118	96.3275
0.0751	89.9849
0.07485	90.5664
0.07544	89.7411
0.07878	84.368
0.08028	82.0467
0.07752	86.7861
0.07627	89.0306
0.0765	88.8231
0.07747	87.3698
0.07861	85.6427
0.07691	88.6291
0.07621	89.968
0.07738	88.1775
0.07736	88.3779
0.07517	92.1831
0.07347	95.1705
0.06914	102.528
0.0678	104.922
0.06987	101.651
0.07096	100.008
0.07229	97.9704
0.07523	93.2561
0.07937	86.5373
0.08141	83.322
0.08122	83.8034
0.07877	88.0389
0.07923	87.4349
0.07964	86.9284
0.0818	83.5007
0.08331	81.171
0.08496	78.5927
0.08666	75.9312
0.08872	72.6771
0.08925	71.9638
0.09078	69.601
0.08891	72.862
0.08737	75.581
0.08613	77.8135
0.08183	85.1135
0.08028	87.8543
0.07962	89.1116
0.07721	93.2893
0.07629	94.9713
0.07783	92.59
0.08184	86.0874
0.08694	77.7869
0.09218	69.265
0.09413	66.1879
0.09429	66.0974
0.09338	67.7727
0.09445	66.1508
0.09365	67.6538
0.09425	66.8177
0.09532	65.2106
0.09881	59.5852
0.10115	55.8577
0.10083	56.564
0.09995	58.1888
0.10071	57.0892
0.10206	55.0267
0.10249	54.4764
0.10113	56.8995
0.10278	54.3182
0.10443	51.7528
0.10836	45.3864
0.10863	45.1049
0.10656	48.7172
0.10843	45.7785
0.10701	48.2934
0.10433	52.916
0.10514	51.7369
0.10646	49.7002
0.106	50.6328
0.10382	54.4153
0.10407	54.1653
0.10428	53.9925
0.10382	54.9239
0.10233	57.5612
0.10145	59.1802
0.10039	61.1151
0.09842	64.5483
0.09738	66.442
0.09556	69.6227
0.09341	73.3665
0.09299	74.2286
0.09307	74.2569
0.09242	75.5031
0.09305	74.626
0.09436	72.6175
0.09654	69.1695
0.0963	69.7301
0.09474	72.488
0.09286	75.7675
0.09222	77.0016
0.09012	80.6509
0.08983	81.2955
0.08836	83.8967
0.08551	88.7914
0.08325	92.7238
0.08472	90.4393
0.08751	85.9752
0.08882	83.9761
0.09016	81.912
0.09479	74.3957
0.09981	66.2302
0.10371	59.9124
0.10494	58.0451
0.10365	60.3461
0.10235	62.6663
0.10416	59.8364
0.10778	53.9932
0.11191	47.2975
0.11197	47.3709
0.1117	47.9723
0.11255	46.7341
0.11256	46.8923
0.1125	47.1435
0.11443	44.1094
0.11304	46.5891
0.11117	49.8523
0.1101	51.7975
0.11109	50.3201
0.11318	47.0168
0.11259	48.1594
0.1141	45.8201
0.11525	44.0727
0.11652	42.134
0.12014	36.2966
0.11954	37.4484
0.11668	42.3727
0.11312	48.4494
0.11417	46.8747
0.11526	45.2285
0.11624	43.7622
0.11551	45.1409
0.1174	42.1766
0.12244	33.9658
0.12691	26.7079
0.12931	22.905
0.1287	24.0833
0.12723	26.6865
0.12695	27.3073
0.12755	26.4816
0.12784	26.1696
0.13022	22.3786
0.13194	19.6974
0.13063	22.0415
0.12971	23.7197
0.12837	26.1168
0.12594	30.3242
0.12378	34.0758
0.12259	36.2162
0.12505	32.286
0.12762	28.1856
0.1302	24.0756
0.13266	20.1546
0.13535	15.8512
0.13506	16.5115
0.13462	17.4076
0.13244	21.1954
0.13024	25.0096
0.13065	24.4976
0.13121	23.7348
0.13327	20.4793
0.13313	20.8667
0.13012	26.0383
0.12777	30.1063
0.1237	37.0172
0.12234	39.4398
0.12359	37.5391
0.1237	37.5271
0.12454	36.2896
0.12764	31.3214
0.13005	27.4861
0.13081	26.388
0.13138	25.6042
0.13211	24.5547
0.13432	21.0483
0.13415	21.5033
0.13395	22.0073
0.13471	20.9024
0.13249	24.7621
0.1313	26.8965
0.12813	32.3242
0.1247	38.1878
0.12261	41.8204
0.12434	39.1076
0.12447	39.0708
0.1223	42.838
0.12074	45.5887
0.11841	49.6166
0.11697	52.1776
0.11607	53.8436
0.11195	60.8466
0.1094	65.2508
0.1092	65.741
0.10853	67.0207
0.10934	65.8436
0.11335	59.3457
0.11559	55.7911
0.11625	54.8728
0.12043	48.0985
0.12535	40.0978
0.12675	37.9308
0.12621	39.0017
0.13003	32.8202
0.12991	33.1973
0.12684	38.4461
0.12521	41.3317
0.12274	45.5909
0.11847	52.8498
0.11651	56.2717
0.11611	57.0992
0.11639	56.7947
0.11758	54.9784
0.11622	57.4131
0.11515	59.3573
0.1137	61.929
0.11316	62.9889
0.11193	65.202
0.10859	70.9019
0.1076	72.7097
0.10855	71.309
0.10945	69.9795
0.11208	65.769
0.11517	60.8063
0.11634	59.0298
0.11536	60.8284
0.11877	55.3256
0.12165	50.7251
0.12164	50.9041
0.11778	57.4724
0.11658	59.6328
0.11859	56.4639
0.11989	54.4774
0.12301	49.4592
0.12375	48.3991
0.12487	46.7101
0.12499	46.6606
0.1246	47.4815
0.12493	47.098
0.12647	44.7118
0.12644	44.9176
0.12651	44.9789
0.12763	43.284
0.12613	45.943
0.12478	48.3407
0.1263	45.9815
0.12562	47.278
0.12491	48.63
0.12266	52.5334
0.12218	53.4917
0.12271	52.7716
0.12543	48.4288
0.12527	48.8521
0.12476	49.8754
0.12434	50.7376
0.1248	50.1325
0.1249	50.1371
0.12823	44.7826
0.13347	36.2444
0.13673	30.9977
0.13768	29.5857
0.13642	31.8474
0.13439	35.3827
0.13085	41.4216
0.1294	43.9925
0.12995	43.2443
0.13073	42.1258
0.1302	43.1716
0.12877	45.7028
0.12723	48.4263
0.12613	50.4242
0.12801	47.4604
0.12871	46.4697
0.12686	49.7037
0.12528	52.5002
0.12622	51.095
0.12651	50.7935
0.12508	53.3238
0.12559	52.6496
0.12519	53.4688
0.12614	52.0654
0.1274	50.1323
0.12536	53.6904
0.12297	57.8253
0.1204	62.2543
0.11756	67.1331
0.11672	68.7047
0.12065	62.341
0.12215	60.008
0.1208	62.427
0.12129	61.7792
0.12089	62.6004
0.11783	67.8467
0.12014	64.1809
0.12323	59.2225
0.12149	62.2654
0.1206	63.9118
0.11993	65.1948
0.11783	68.8417
0.11603	71.9927
0.11629	71.7354
0.11688	70.915
0.11515	73.9628
0.11787	69.6154
0.11891	68.0462
0.11912	67.8708
0.11446	75.7712
0.11202	79.9854
0.108	86.8173
0.10536	91.3788
0.10584	90.7374
0.10721	88.6372
0.10751	88.2957
0.10821	87.3092
0.1078	88.1495
0.10829	87.5106
0.11251	80.6572
0.11621	74.6935
0.11804	71.8167
0.1177	72.5546
0.11925	70.1425
0.12076	67.7929
0.12148	66.7775
0.12143	67.016
0.12085	68.152
0.12185	66.6558
0.12225	66.1547
0.12302	65.0395
0.12085	68.8173
0.11903	71.997
0.11964	71.1605
0.11914	72.1567
0.117	75.8708
0.1137	81.511
0.11294	82.9392
0.11292	83.1335
0.10968	88.689
0.10501	96.6009
0.10269	100.618
0.10223	101.548
0.10284	100.7
0.10634	95.0551
0.10972	89.6114
0.1155	80.1873
0.12006	72.7849
0.12821	59.4179
0.13171	53.7722
0.12757	60.8088
0.12398	66.9428
0.12237	69.7726
0.12158	71.255
0.12035	73.4562
0.11938	75.2312
0.11803	77.6372
0.11652	80.3163
0.11468	83.5357
0.11477	83.5481
0.11718	79.7172
0.12094	73.6413
0.11965	75.9503
0.11758	79.5605
0.1164	81.6763
0.11447	85.0499
0.11332	87.1244
0.11164	90.0764
0.11125	90.8938
0.11009	92.9786
0.10986	93.5382
0.10819	96.4664
0.1067	99.1045
0.10516	101.823
0.10794	97.3789
0.11013	93.9135
0.11168	91.503
0.11101	92.7782
0.10887	96.5031
0.10886	96.691
0.10841	97.5936
0.10963	95.734
0.10942	96.2606
0.11104	93.7287
0.10844	98.2149
0.10377	106.124
0.09935	113.633
0.09427	122.231
0.09164	126.758
0.09114	127.766
0.09232	125.96
0.0919	126.838
0.09277	125.559
0.09218	126.703
0.09366	124.404
0.09219	127.008
0.08793	134.246
0.0831	142.431
0.07897	149.448
0.07834	150.669
0.07852	150.534
0.07816	151.299
0.08136	146.155
0.08186	145.483
0.08248	144.633
0.08146	146.488
0.08208	145.624
0.08242	145.216
0.08244	145.349
0.08568	140.137
0.08754	137.217
0.09156	130.715
0.09383	127.115
0.09378	127.364
0.09493	125.618
0.09321	128.641
0.09199	130.828
0.09037	133.687
0.08875	136.541
0.08636	140.67
0.0843	144.263
0.08241	147.562
0.08064	150.669
0.08147	149.45
0.08192	148.882
0.08173	149.35
0.08277	147.797
0.08311	147.405
0.07997	152.782
0.07972	153.357
0.07871	155.201
0.0758	160.189
0.07505	161.601
0.07573	160.642
0.07587	160.571
0.07881	155.863
0.08132	151.857
0.08266	149.802
0.08292	149.541
0.08258	150.264
0.08309	149.583
0.08195	151.649
0.08081	153.699
0.07802	158.508
0.07806	158.606
0.07669	161.046
0.07929	156.892
0.08458	148.27
0.08707	144.307
0.08802	142.894
0.08728	144.286
0.08675	145.334
0.08581	147.064
0.08467	149.126
0.08016	156.785
0.07802	160.489
0.07587	164.233
0.07365	168.077
0.07107	172.534
0.07118	172.516
0.07067	173.528
0.06934	175.904
0.06663	180.56
0.06621	181.431
0.0646	184.267
0.06259	187.764
0.06178	189.285
0.0608	191.066
0.06226	188.812
0.06045	191.991
0.05819	195.903
0.05576	200.101
0.05374	203.631
0.05436	202.766
0.05657	199.255
0.0589	195.555
0.05834	196.644
0.05733	198.491
0.05481	202.839
0.05358	205.047
0.0539	204.68
0.0535	205.51
0.05267	207.053
0.05176	208.732
0.05172	208.971
0.05147	209.555
0.05434	204.945
0.0571	200.526
0.05964	196.483
0.06044	195.329
0.06204	192.829
0.06246	192.309
0.06355	190.651
0.06255	192.475
0.05957	197.595
0.05709	201.878
0.05807	200.42
0.06215	193.817
0.0643	190.412
0.0676	185.103
0.06984	181.548
0.0736	175.469
0.07792	168.468
0.08199	161.873
0.08396	158.767
0.08389	159.05
0.07955	166.422
0.07586	172.715
0.07395	176.055
0.07231	178.931
0.07283	178.236
0.07312	177.924
0.0748	175.309
0.07504	175.075
0.07379	177.315
0.07249	179.629
0.07334	178.385
0.0744	176.8
0.07104	182.532
0.06684	189.67
0.06441	193.876
0.06301	196.365
0.06403	194.836
0.06474	193.822
0.06667	190.784
0.06954	186.187
0.07248	181.481
0.07349	179.967
0.07354	180.045
0.07185	183.028
0.07134	184.038
0.07082	185.06
0.06975	187.001
0.06844	189.345
0.06667	192.457
0.0641	196.884
0.06362	197.84
0.06213	200.478
0.06109	202.379
0.05889	206.199
0.05664	210.095
0.0515	218.788
0.04756	225.501
0.04605	228.177
0.0458	228.761
0.04542	229.55
0.04919	223.453
0.04918	223.637
0.05014	222.213
0.05276	218.028
0.05486	214.709
0.05571	213.459
0.05848	209.034
0.06521	198.021
0.06963	190.862
0.07093	188.868
0.07042	189.877
0.07106	188.986
0.07215	187.336
0.07073	189.858
0.06735	195.636
0.06912	192.864
0.07051	190.724
0.07128	189.615
0.06803	195.176
0.06653	197.831
0.06625	198.466
0.06542	200.005
0.06641	198.533
0.06566	199.932
0.06854	195.327
0.07123	191.029
0.07159	190.6
0.07141	191.058
0.06877	195.606
0.06831	196.539
0.06895	195.636
0.07275	189.489
0.0758	184.604
0.07494	186.189
0.07271	190.06
0.07206	191.305
0.07016	194.632
0.06614	201.463
0.06448	204.381
0.06719	200.052
0.06643	201.486
0.06596	202.429
0.06575	202.942
0.06454	205.113
0.06286	208.064
0.06296	208.066
0.06271	208.655
0.06467	205.556
0.06196	210.227
0.06003	213.602
0.06051	212.973
0.05871	216.129
0.05598	220.812
0.05676	219.691
0.05857	216.849
0.05697	219.666
0.05601	221.437
0.05588	221.822
0.05904	216.736
0.0629	210.488
0.06388	209.039
0.06215	212.065
0.05954	216.567
0.05579	222.965
0.05548	223.645
0.05335	227.35
0.05129	230.933
0.05173	230.373
0.05266	228.994
0.05324	228.195
0.05211	230.225
0.0545	226.432
0.05902	219.095
0.05909	219.145
0.06026	217.365
0.06262	213.622
0.06365	212.065
0.06097	216.685
0.06059	217.483
0.062	215.302
0.06342	213.122
0.06347	213.197
0.06386	212.714
0.06317	214.027
0.06552	210.297
0.06766	206.912
0.0706	202.2
0.06974	203.788
0.07025	203.101
0.07189	200.543
0.07616	193.624
0.07744	191.674
0.07844	190.173
0.07848	190.278
0.07944	188.842
0.07921	189.388
0.07787	191.78
0.07481	197.027
0.07206	201.766
0.06959	206.021
0.06988	205.715
0.07104	203.961
0.07661	194.867
0.07879	191.415
0.08169	186.777
0.08239	185.774
0.08248	185.794
0.07999	190.092
0.07917	191.617
0.0811	188.574
0.07865	192.821
0.07985	190.993
0.08072	189.718
0.0811	189.248
0.07921	192.553
0.07707	196.26
0.07628	197.739
0.07622	198.013
0.0782	194.882
0.07915	193.481
0.07796	195.623
0.07749	196.561
0.07702	197.51
0.07475	201.448
0.07446	202.098
0.07566	200.274
0.07745	197.47
0.08011	193.216
0.08182	190.545
0.07918	195.085
0.07609	200.385
0.07085	209.248
0.06914	212.253
0.06719	215.659
0.06581	218.112
0.06544	218.891
0.06411	221.27
0.06298	223.307
0.05739	232.752
0.0539	238.71
0.0521	241.86
0.05069	244.372
0.04721	250.318
0.05091	244.347
0.05583	236.347
0.05995	229.663
0.06261	225.416
0.06162	227.221
0.06451	222.598
0.0637	224.11
0.06383	224.054
0.06507	222.163
0.06622	220.415
0.06753	218.406
0.06743	218.745
0.06912	216.099
0.06999	214.821
0.07145	212.571
0.07095	213.559
0.06968	215.838
0.06876	217.525
[truncated: 48,002 more rows]
