# Supplementary material for: Discovery of a heparan sulfate binding domain in monkeypox virus H3 as an anti-poxviral drug target combining AI and MD simulations
Source: eLife. 2025 Jan 16;13:RP100545. doi: 10.7554/eLife.100545 (PMC11737874; doi:10.7554/eLife.100545)
Supplement: Figure 2—source data 3. [file elife-100545-fig2-data3.xlsx]

## Sheet: Sheet1
motif1-ΔG kCal/mol	motif2-ΔG kCal/mol	motif3-ΔG kCal/mol	helical motif-ΔG kCal/mol
-21.8358	0.263116	-4.88425	-12.27
-20.4204	-8.99611	-1.08791	-36.5085
-9.20043	-7.64725	-21.1506	-45.0682
-12.0232	-10.4717	1.47813	-25.57
