# Supplementary material for: Discovery of a heparan sulfate binding domain in monkeypox virus H3 as an anti-poxviral drug target combining AI and MD simulations
Source: eLife. 2025 Jan 16;13:RP100545. doi: 10.7554/eLife.100545 (PMC11737874; doi:10.7554/eLife.100545)
Supplement: Figure 2—source data 4. [file elife-100545-fig2-data4.xlsx]

## Sheet: Sheet1
0	1	2	3	4	5	6	7	8	9	10	11	12	13	14	15	16	17	18	19	20	21	22	23	24	25	26	27	28	29	30	31	32	33	34	35	36	37	38	39	40	41	42	43	44	45	46	47	48	49
0	0	0	0	0	0	0	0	0	0	0	0	0	0	0	0	0	0	0	0	0	0	0	0	0	0	0	0	0	0	0	0	0	0	0	0	0	0	0	0	0	0	0	0	0	0	0	0	0	0
0.15	0.2	0.3	0.25	0.15	0.1	0.15	0.1	0.2	0.15	0.2	0.1	0.15	0.15	0.1	0.1	0.1	0.1	0.1	0.1	0.1	0.1	0.1	0.1	0.1	0.1	0.1	0.1	0.1	0.1	0.1	0.1	0.1	0.1	0.1	0.1	0.1	0.1	0.1	0.1	0.1	0.1	0.1	0.1	0.1	0.1	0.1	0.05	0.05	0.05
0	0	0	0	0	0	0	0	0	0	0	0	0	0	0	0	0	0	0	0	0	0	0	0	0	0	0	0	0	0	0	0	0	0	0	0	0	0	0	0	0	0	0	0	0	0	0	0	0	0
0	0	0	0	0	0	0	0	0	0	0	0	0	0	0	0	0	0	0	0	0	0	0	0	0	0	0	0	0	0	0	0	0	0	0	0	0	0	0	0	0	0	0	0	0	0	0	0	0	0
0.75	0.6	0.5	0.25	0.2	0.2	0.2	0.15	0.15	0.15	0.25	0.2	0.05	0.05	0.05	0	0	0.05	0.15	0.1	0.1	0	0	0	0.05	0.1	0.15	0.1	0.15	0.2	0.25	0.25	0.2	0.2	0.25	0.15	0.3	0.3	0.25	0.2	0.25	0.2	0.2	0.1	0.15	0.2	0.25	0.2	0.15	0.25
0.6	0.4	0.3	0.5	0.4	0.55	0.5	0.45	0.45	0.3	0.3	0.3	0.35	0.4	0.4	0.4	0.45	0.3	0.3	0.3	0.3	0.25	0.25	0.35	0.25	0.25	0.25	0.3	0.2	0.2	0.25	0.3	0.35	0.35	0.25	0.25	0.2	0.2	0.2	0.15	0.15	0.15	0.2	0.25	0.15	0.15	0.05	0.1	0.25	0.25
0	0	0	0	0	0	0	0	0	0	0	0	0	0	0	0	0	0	0	0	0	0	0	0	0	0	0	0	0	0	0	0	0	0	0	0	0	0	0	0	0	0	0	0	0	0	0	0	0	0
0	0	0	0	0	0	0	0	0	0	0	0	0	0	0	0	0	0	0	0	0	0	0	0	0	0	0	0	0	0	0	0	0	0	0	0	0	0	0	0	0	0	0	0	0	0	0	0	0	0
0	0.05	0	0	0	0	0	0	0	0	0	0	0	0	0	0	0	0	0	0	0	0	0	0	0	0	0	0	0	0	0	0	0	0	0.05	0	0	0	0	0	0	0	0	0	0	0	0	0	0	0
0.3	0.3	0.3	0.25	0.2	0.15	0.15	0.05	0.05	0.05	0.05	0.05	0.05	0	0.1	0.05	0.05	0.05	0.05	0	0.05	0	0	0	0	0	0	0	0	0	0	0	0	0	0	0	0	0	0	0	0	0	0	0	0	0	0	0	0	0
0.75	0.5	0.55	0.6	0.55	0.45	0.4	0.4	0.55	0.55	0.55	0.65	0.55	0.55	0.55	0.55	0.55	0.5	0.6	0.65	0.6	0.65	0.6	0.55	0.6	0.6	0.55	0.6	0.5	0.65	0.65	0.55	0.45	0.5	0.55	0.6	0.65	0.6	0.55	0.5	0.4	0.55	0.55	0.55	0.5	0.5	0.5	0.4	0.35	0.45
0.3	0.2	0.3	0.3	0.3	0.1	0.15	0.1	0.1	0.15	0.1	0.1	0.1	0.2	0.05	0.1	0	0	0.05	0.05	0.05	0.05	0.05	0.05	0.05	0.05	0.1	0.1	0.05	0.05	0.05	0.05	0.05	0.05	0.05	0.05	0.05	0.05	0.05	0.05	0.05	0.05	0.05	0.05	0.05	0.05	0	0.05	0.05	0.05
0	0	0	0	0	0	0	0	0	0	0	0	0	0	0	0	0	0	0	0.05	0	0	0	0	0	0	0	0	0	0	0	0	0	0	0	0	0	0	0	0	0	0	0	0	0	0	0	0	0	0
0.15	0.1	0.05	0.05	0	0	0	0	0	0	0	0	0	0.05	0	0	0	0.05	0	0	0	0	0	0	0	0	0	0	0	0	0	0	0	0	0	0	0	0	0	0	0	0	0	0	0	0	0	0	0	0
0.75	0.8	0.75	0.8	0.65	0.7	0.7	0.7	0.65	0.7	0.6	0.55	0.55	0.55	0.5	0.55	0.55	0.55	0.45	0.35	0.4	0.45	0.45	0.45	0.5	0.45	0.55	0.5	0.45	0.45	0.45	0.45	0.45	0.4	0.5	0.5	0.5	0.45	0.5	0.45	0.4	0.45	0.45	0.4	0.4	0.4	0.4	0.4	0.4	0.25
0.3	0.2	0.2	0.2	0.2	0.2	0.2	0.2	0.2	0.25	0.2	0.2	0.15	0.15	0.15	0.15	0.15	0.2	0.15	0.15	0.15	0.15	0.15	0.15	0.15	0.15	0.15	0.2	0.2	0.15	0.2	0.15	0.15	0.15	0.15	0.15	0.05	0.1	0.1	0.1	0.1	0.1	0.1	0.1	0.05	0.05	0.05	0.05	0.05	0
0	0	0	0	0	0	0	0	0	0	0	0	0	0	0	0	0	0	0	0	0	0	0	0	0	0	0	0	0	0	0	0	0	0	0	0	0	0	0	0	0	0	0	0	0	0	0	0	0	0
0	0	0	0	0	0	0.05	0	0.05	0	0	0.05	0	0	0	0	0.05	0	0	0	0.05	0.05	0.05	0.05	0.05	0.05	0.05	0	0	0	0	0	0	0.1	0.1	0.1	0.1	0.1	0.1	0.1	0.1	0.1	0.1	0.1	0.1	0.1	0.1	0.1	0.1	0.1
0	0	0	0	0	0	0	0	0	0	0	0	0	0	0	0	0	0	0	0	0	0	0	0	0	0	0	0	0	0	0	0	0	0	0	0	0	0	0	0	0	0	0	0	0	0	0	0	0	0
0.75	0.55	0.45	0.45	0.45	0.35	0.5	0.3	0.35	0.25	0.25	0.2	0.2	0.2	0.2	0.25	0.2	0.2	0.2	0.25	0.15	0.25	0.2	0.2	0.15	0.15	0.15	0.15	0.15	0.15	0.15	0.15	0.15	0.15	0.15	0.1	0.1	0.15	0.15	0.25	0.2	0.35	0.2	0.3	0.25	0.3	0.2	0.25	0.2	0.2
1.05	0.8	0.9	0.8	0.75	0.7	0.65	0.6	0.7	0.65	0.7	0.65	0.7	0.65	0.6	0.6	0.6	0.55	0.55	0.5	0.6	0.5	0.5	0.5	0.45	0.4	0.4	0.4	0.4	0.35	0.45	0.5	0.45	0.45	0.35	0.4	0.4	0.45	0.45	0.35	0.45	0.35	0.4	0.4	0.4	0.4	0.4	0.4	0.4	0.4
0.3	0	0	0	0.05	0	0.05	0	0	0.05	0.05	0	0.05	0	0.05	0	0.1	0	0.05	0	0	0.05	0	0	0	0.05	0	0.1	0	0.05	0.05	0	0	0	0	0.05	0	0	0	0.05	0.05	0.05	0	0	0	0	0	0.05	0	0
0.9	0.6	0.65	0.55	0.5	0.7	0.5	0.5	0.5	0.4	0.4	0.35	0.5	0.55	0.55	0.55	0.45	0.4	0.4	0.45	0.55	0.35	0.45	0.4	0.3	0.25	0.4	0.35	0.2	0.35	0.3	0.35	0.25	0.4	0.5	0.3	0.45	0.35	0.3	0.4	0.45	0.35	0.35	0.3	0.45	0.25	0.3	0.4	0.4	0.35
0.6	0.6	0.6	0.65	0.55	0.55	0.65	0.65	0.65	0.45	0.45	0.45	0.4	0.4	0.4	0.35	0.4	0.3	0.3	0.3	0.2	0.25	0.3	0.3	0.35	0.3	0.3	0.25	0.3	0.35	0.3	0.3	0.3	0.2	0.2	0.35	0.35	0.4	0.35	0.35	0.45	0.3	0.1	0.15	0.2	0.25	0.25	0.25	0.15	0.2
0.6	0.55	0.4	0.45	0.4	0.4	0.3	0.2	0.35	0.3	0.25	0.35	0.4	0.25	0.3	0.15	0.25	0.25	0.25	0.25	0.25	0.3	0.25	0.15	0.25	0.25	0.25	0.25	0.25	0.2	0.15	0.25	0.3	0.25	0.15	0.2	0.2	0.2	0.2	0.2	0.2	0.2	0.15	0.15	0.15	0.15	0.1	0.2	0.15	0.15
0.15	0.15	0.15	0.1	0.15	0.1	0.05	0.05	0	0.05	0.05	0.05	0.05	0.05	0.05	0.05	0.05	0.05	0.05	0.05	0.05	0.1	0.1	0.05	0.05	0.05	0.05	0.05	0.1	0.1	0.1	0.05	0.1	0.1	0.1	0.1	0.1	0.1	0.1	0.1	0.1	0.1	0.1	0.1	0.1	0.1	0.1	0.1	0.1	0.1
0.45	0.35	0.35	0.2	0.35	0.35	0.3	0.25	0.4	0.35	0.35	0.25	0.4	0.25	0.25	0.3	0.25	0.2	0.2	0.2	0.2	0.25	0.15	0.2	0.2	0.25	0.2	0.35	0.3	0.3	0.2	0.3	0.2	0.2	0.25	0.3	0.3	0.25	0.3	0.3	0.4	0.3	0.3	0.3	0.3	0.35	0.35	0.35	0.35	0.35
0.3	0.3	0.15	0.25	0.25	0.2	0.35	0.35	0.4	0.35	0.35	0.4	0.5	0.4	0.45	0.4	0.4	0.45	0.35	0.35	0.3	0.35	0.3	0.2	0.2	0.2	0.15	0.25	0.3	0.2	0.25	0.15	0.15	0.15	0.2	0.15	0.2	0.15	0.15	0.25	0.15	0.25	0.2	0.1	0.05	0.05	0	0.05	0.1	0.05
0	0	0	0	0	0	0	0	0	0	0	0	0	0	0	0	0	0	0	0	0	0	0	0	0	0	0	0	0	0	0	0	0	0	0.05	0	0	0	0.05	0	0	0	0	0	0	0	0	0	0	0
0.45	0.3	0.3	0.3	0.25	0.25	0.2	0.2	0.15	0.15	0.15	0.15	0.1	0.15	0.1	0.15	0.1	0.15	0.1	0	0.1	0.1	0.1	0.15	0.15	0.05	0.15	0.25	0.2	0.25	0.2	0.25	0.2	0.2	0.2	0.2	0.15	0.2	0.15	0.1	0.05	0.05	0.05	0.05	0.05	0.05	0.05	0.05	0.1	0.1
0	0	0	0	0	0	0	0	0	0	0	0	0	0	0	0	0	0	0	0	0	0	0	0	0	0	0	0	0	0	0	0	0	0	0	0	0	0	0	0	0	0	0	0	0	0	0	0	0	0
0	0	0	0	0	0	0	0	0	0	0	0	0	0	0	0	0	0	0	0	0	0	0	0	0	0	0	0	0	0	0	0	0	0	0	0	0	0	0	0	0	0	0	0	0	0	0	0	0	0
1.05	0.8	0.85	0.8	0.8	0.75	0.8	0.8	0.85	0.8	0.8	0.85	0.85	0.75	0.75	0.65	0.7	0.65	0.75	0.75	0.7	0.65	0.6	0.45	0.55	0.55	0.55	0.65	0.55	0.45	0.5	0.55	0.65	0.6	0.6	0.6	0.55	0.55	0.6	0.5	0.55	0.6	0.45	0.45	0.5	0.5	0.5	0.45	0.4	0.5
0.3	0.25	0.4	0.4	0.4	0.4	0.4	0.4	0.35	0.35	0.35	0.35	0.3	0.35	0.35	0.35	0.3	0.25	0.25	0.3	0.25	0.3	0.35	0.3	0.3	0.25	0.3	0.3	0.3	0.3	0.3	0.3	0.3	0.3	0.3	0.3	0.3	0.3	0.3	0.3	0.3	0.3	0.3	0.3	0.3	0.25	0.3	0.3	0.3	0.3
0.15	0.1	0.15	0.1	0.1	0.15	0.1	0.1	0.1	0.05	0.05	0.05	0.05	0.05	0.05	0.1	0.1	0.1	0.1	0.1	0.05	0.05	0.05	0	0	0	0.05	0.05	0	0	0	0.05	0.05	0.05	0.05	0	0.05	0	0	0	0.05	0	0	0	0	0	0	0.05	0	0
0.15	0.15	0.15	0.15	0.15	0.15	0.15	0.15	0.15	0.15	0.15	0.15	0.15	0.15	0.15	0.15	0.15	0.15	0.15	0.15	0.15	0.15	0.15	0.15	0.15	0.15	0.15	0.15	0.15	0.15	0.15	0.15	0.15	0.15	0.15	0.15	0.15	0.15	0.15	0.15	0.15	0.15	0.15	0.15	0.15	0.15	0.15	0.15	0.15	0.15
0.75	0.5	0.4	0.4	0.55	0.55	0.65	0.55	0.5	0.45	0.4	0.45	0.45	0.35	0.3	0.4	0.35	0.35	0.55	0.5	0.45	0.4	0.35	0.4	0.45	0.4	0.4	0.35	0.3	0.25	0.25	0.15	0.2	0.25	0.2	0.25	0.2	0.15	0.1	0.1	0.15	0.1	0.15	0.2	0.15	0.15	0.15	0.15	0.15	0.2
0	0	0	0	0	0	0	0	0	0	0	0.05	0.05	0	0	0	0	0	0	0	0	0	0	0	0	0	0	0	0	0	0	0	0	0	0	0	0	0	0	0	0	0	0	0	0	0	0	0	0	0
1.5	1.1	1.2	0.95	0.9	0.9	0.85	0.95	0.8	0.9	0.85	0.7	0.8	0.8	0.85	0.8	0.65	0.7	0.7	0.7	0.75	0.75	0.7	0.75	0.7	0.8	0.8	0.75	0.7	0.6	0.6	0.6	0.55	0.6	0.55	0.55	0.45	0.5	0.4	0.55	0.5	0.55	0.55	0.55	0.55	0.6	0.6	0.55	0.5	0.45
1.5	1.15	1.25	1.05	1.1	1.05	1.3	1.2	1.1	1	0.95	0.75	1.05	0.95	0.95	0.95	0.95	0.9	1.05	0.9	1.05	0.75	0.85	0.85	0.7	0.7	0.8	0.55	0.65	0.8	0.75	0.95	0.65	0.85	0.9	1.1	1.15	0.9	0.85	0.8	0.85	0.8	0.75	0.8	0.7	0.85	0.75	0.75	0.8	0.85
0.9	0.95	0.9	0.85	0.75	0.8	1.05	0.9	0.95	1	1.05	1	0.9	0.95	0.95	0.95	0.95	1	0.95	1	0.95	1	0.95	1	1	1	0.85	0.85	0.9	0.85	0.8	0.95	0.8	0.65	0.8	0.85	0.8	0.8	0.9	0.9	0.9	0.85	0.9	0.95	0.9	0.85	0.9	0.9	0.9	0.95
0.45	0.55	0.45	0.5	0.4	0.5	0.45	0.45	0.4	0.4	0.4	0.4	0.45	0.4	0.4	0.4	0.35	0.4	0.35	0.4	0.3	0.2	0.25	0.2	0.3	0.15	0.25	0.15	0.25	0.25	0.2	0.15	0.15	0.15	0.1	0.2	0.1	0.1	0.1	0.15	0.15	0.15	0.1	0.1	0.1	0.1	0.25	0.2	0.2	0.15
0.9	0.65	0.65	0.65	0.7	0.65	0.7	0.7	0.7	0.6	0.7	0.65	0.65	0.6	0.5	0.65	0.6	0.65	0.45	0.6	0.45	0.55	0.5	0.45	0.55	0.5	0.5	0.4	0.45	0.5	0.4	0.55	0.7	0.45	0.6	0.55	0.65	0.65	0.55	0.55	0.6	0.65	0.4	0.45	0.55	0.6	0.65	0.55	0.55	0.55
[truncated: 5,000 more columns]
