# Supplementary material for: Discovery of a heparan sulfate binding domain in monkeypox virus H3 as an anti-poxviral drug target combining AI and MD simulations
Source: eLife. 2025 Jan 16;13:RP100545. doi: 10.7554/eLife.100545 (PMC11737874; doi:10.7554/eLife.100545)
Supplement: Figure 2—source data 5. [file elife-100545-fig2-data5.xlsx]

## Sheet: Sheet1
Time (ns)	RMSD (nm)
0	4e-07
100	0.248296
200	0.256994
300	0.302242
400	0.344893
500	0.384956
600	0.363527
700	0.346828
800	0.347446
900	0.351844
1000	0.379685
1100	0.376438
1200	0.379868
1300	0.404752
1400	0.425276
1500	0.496944
1600	0.56909
1700	0.542335
1800	0.684722
1900	0.602589
2000	0.650404
2100	0.694331
2200	0.6742
2300	0.723447
2400	0.597624
2500	0.651273
2600	0.657161
2700	0.552255
2800	0.630045
2900	0.68352
3000	0.726768
3100	0.711566
3200	0.78049
3300	0.751996
3400	0.764037
3500	0.739771
3600	0.716584
3700	0.611583
3800	0.628489
3900	0.652486
4000	0.625716
4100	0.64389
4200	0.797122
4300	0.834504
4400	0.74139
4500	0.859968
4600	0.899497
4700	0.822751
4800	0.804291
4900	0.934393
5000	0.941541
5100	0.776619
5200	0.785664
5300	0.812809
5400	0.851233
5500	0.837043
5600	0.93999
5700	0.980034
5800	1.05028
5900	0.939807
6000	1.00632
6100	0.958172
6200	0.931078
6300	0.931343
6400	0.93438
6500	0.900414
6600	0.917699
6700	0.895423
6800	0.977516
6900	0.930129
7000	1.04694
7100	1.00683
7200	1.10375
7300	0.977334
7400	0.922685
7500	1.06199
7600	0.997347
7700	1.04441
7800	0.976189
7900	0.954682
8000	1.13949
8100	1.23843
8200	1.22888
8300	1.35377
8400	1.24545
8500	1.30504
8600	1.41862
8700	1.58792
8800	1.60344
8900	1.66146
9000	1.68949
9100	1.61689
9200	1.67361
9300	1.69978
9400	1.69346
9500	1.76467
9600	1.60628
9700	1.54565
9800	1.69957
9900	1.70513
10000	1.75879
10100	1.70627
10200	1.58365
10300	1.47774
10400	1.33047
10500	1.24328
10600	1.08065
10700	1.24959
10800	1.28316
10900	1.12876
11000	1.10161
11100	1.19134
11200	1.32768
11300	1.25651
11400	1.53968
11500	1.45577
11600	1.39041
11700	1.2249
11800	1.16701
11900	1.22738
12000	1.17033
12100	1.23004
12200	1.26714
12300	1.31317
12400	1.55159
12500	1.52942
12600	1.48314
12700	1.58274
12800	1.57537
12900	1.82099
13000	1.72509
13100	1.71649
13200	1.55627
13300	1.66086
13400	1.59668
13500	1.67525
13600	1.47705
13700	1.55824
13800	1.54986
13900	1.58405
14000	1.48066
14100	1.58482
14200	1.73423
14300	1.74329
14400	1.45877
14500	1.43765
14600	1.45442
14700	1.60149
14800	1.5368
14900	1.51813
15000	1.53085
15100	1.51927
15200	1.50874
15300	1.38029
15400	1.47636
15500	1.44129
15600	1.47733
15700	1.51162
15800	1.48833
15900	1.83435
16000	1.93496
16100	1.86643
16200	1.96941
16300	2.20568
16400	2.41912
16500	2.50239
16600	2.20148
16700	2.14505
16800	2.37791
16900	2.09531
17000	2.33607
17100	2.36818
17200	2.65581
17300	2.75987
17400	2.79928
17500	2.88437
17600	2.56831
17700	2.49861
17800	2.68877
17900	2.75414
18000	2.66711
18100	2.47337
18200	2.4463
18300	2.45964
18400	2.4844
18500	2.40516
18600	2.38157
18700	2.84204
18800	3.0467
18900	3.10225
19000	3.04032
19100	3.07787
19200	3.10068
19300	3.13024
19400	2.8977
19500	3.15304
19600	3.06436
19700	3.1403
19800	2.97945
19900	2.77809
20000	2.85204
20100	2.93064
20200	3.15105
20300	2.93196
20400	3.16696
20500	3.17714
20600	3.23611
20700	3.10215
20800	3.28117
20900	3.3972
21000	3.47893
21100	3.40453
21200	3.36674
21300	3.32958
21400	3.50312
21500	3.43922
21600	3.40555
21700	3.35856
21800	3.65086
21900	3.7483
22000	3.91705
22100	3.68592
22200	3.7973
22300	3.69735
22400	3.91232
22500	3.97146
22600	3.9235
22700	4.09424
22800	3.85292
22900	3.86218
23000	3.90976
23100	3.99432
23200	3.90491
23300	3.59126
23400	3.33686
23500	3.20001
23600	3.30531
23700	3.27632
23800	3.27991
23900	3.23719
24000	3.25496
24100	3.32489
24200	3.30923
24300	3.36009
24400	3.43914
24500	3.42159
24600	3.35809
24700	3.51842
24800	3.55183
24900	3.67092
25000	3.5953
25100	3.53831
25200	3.74593
25300	3.64764
25400	3.60846
25500	3.68244
25600	3.59492
25700	3.45897
25800	3.43277
25900	3.37562
26000	3.38555
26100	3.42556
26200	3.47472
26300	3.2944
26400	3.2021
26500	3.25679
26600	3.13687
26700	3.14095
26800	3.18716
26900	3.21109
27000	3.17582
27100	3.10358
27200	3.16473
27300	3.24652
27400	3.2984
27500	3.2485
27600	3.2768
27700	3.27255
27800	3.2478
27900	3.31279
28000	3.30789
28100	3.26061
28200	3.31245
28300	3.28107
28400	3.15831
28500	3.22744
28600	3.16798
28700	3.26126
28800	3.22373
28900	3.2186
29000	3.24501
29100	3.36136
29200	3.33811
29300	3.31602
29400	3.42932
29500	3.36513
29600	3.28369
29700	3.29503
29800	3.41177
29900	3.2793
30000	3.26798
30100	3.28239
30200	3.28812
30300	3.30698
30400	3.37521
30500	3.4046
30600	3.31797
30700	3.28147
30800	3.31022
30900	3.38265
31000	3.34368
31100	3.42044
31200	3.42292
31300	3.39283
31400	3.49253
31500	3.48293
31600	3.53098
31700	3.54745
31800	3.58666
31900	3.59143
32000	3.51722
32100	3.5503
32200	3.51349
32300	3.5606
32400	3.55554
32500	3.48407
32600	3.63629
32700	3.52864
32800	3.49927
32900	3.50419
33000	3.57517
33100	3.56165
33200	3.68811
33300	3.72951
33400	3.48898
33500	3.34524
33600	3.48778
33700	3.55795
33800	3.47381
33900	3.54944
34000	3.50711
34100	3.56493
34200	3.60779
34300	3.64779
34400	3.57423
34500	3.65605
34600	3.62102
34700	3.39772
34800	3.45318
34900	3.38043
35000	3.33461
35100	3.49357
35200	3.54182
35300	3.47127
35400	3.41828
35500	3.25019
35600	3.36289
35700	3.13069
35800	3.17518
35900	3.13355
36000	3.25929
36100	3.1517
36200	2.99644
36300	2.95062
36400	3.07854
36500	3.12858
36600	3.08203
36700	3.13481
36800	3.19179
36900	3.26916
37000	3.53021
37100	3.58684
37200	3.31305
37300	3.20134
37400	3.11958
37500	3.22791
37600	3.24264
37700	3.33319
37800	3.24818
37900	3.14493
38000	3.15989
38100	3.40675
38200	3.33936
38300	3.49917
38400	3.5037
38500	3.44859
38600	3.35476
38700	3.34692
38800	3.19849
38900	3.26198
39000	3.35969
39100	3.08896
39200	3.25358
39300	3.39218
39400	3.22051
39500	3.30654
39600	3.41782
39700	3.05886
39800	2.91273
39900	2.90351
40000	3.12926
40100	2.72698
40200	2.8461
40300	2.86232
40400	2.89652
40500	2.80727
40600	2.69565
40700	2.73994
40800	2.75523
40900	2.62698
41000	2.86989
41100	2.99852
41200	2.94353
41300	2.83043
41400	2.93029
41500	2.89756
41600	3.17525
41700	3.40482
41800	3.26075
41900	3.21081
42000	2.88487
42100	2.91726
42200	2.94246
42300	3.11507
42400	3.1206
42500	3.04866
42600	3.25021
42700	3.29778
42800	3.25181
42900	3.48548
43000	3.42127
43100	3.49152
43200	3.54394
43300	3.51902
43400	3.49035
43500	3.53232
43600	3.43493
43700	3.73728
43800	3.71645
43900	3.39408
44000	3.34853
44100	3.43905
44200	3.45354
44300	3.44912
44400	3.30116
44500	3.34171
44600	3.19428
44700	3.39585
44800	3.16607
44900	3.02225
45000	3.20319
45100	3.09564
45200	3.10971
45300	3.12769
45400	3.22702
45500	3.30475
45600	3.15017
45700	3.21287
45800	3.23747
45900	3.20966
46000	3.29069
46100	3.20127
46200	3.16563
46300	3.21213
46400	3.21135
46500	3.18162
46600	3.16977
46700	3.24183
46800	3.22278
46900	3.26051
47000	3.18799
47100	3.30413
47200	3.33309
47300	3.29057
47400	3.23223
47500	3.22512
47600	3.15809
47700	3.21806
47800	3.14695
47900	3.1424
48000	3.07983
48100	3.24116
48200	3.2864
48300	3.17275
48400	3.16511
48500	3.24107
48600	3.26759
48700	3.2948
48800	3.32741
48900	3.40523
49000	3.28621
49100	3.30746
49200	3.12125
49300	3.14071
49400	3.1238
49500	3.16839
49600	3.25963
49700	3.30557
49800	3.24379
49900	3.24837
50000	3.26744
50100	3.1459
50200	3.1868
50300	3.36251
50400	3.3447
50500	3.36821
50600	3.33522
50700	3.28172
50800	3.35793
50900	3.37306
51000	3.50876
51100	3.56151
51200	3.4082
51300	3.52315
51400	3.35061
51500	3.31782
51600	3.27826
51700	3.22445
51800	3.38396
51900	3.28021
52000	3.44669
52100	3.40858
52200	3.4913
52300	3.50671
52400	3.29179
52500	3.31144
52600	3.38789
52700	3.44051
52800	3.48697
52900	3.43362
53000	3.5827
53100	3.50203
53200	3.56104
53300	3.65899
53400	3.45958
53500	3.41342
53600	3.34509
53700	3.39194
53800	3.27348
53900	3.17255
54000	3.13824
54100	3.13748
54200	2.88189
54300	2.97147
54400	2.96009
54500	2.88841
54600	3.24615
54700	3.39954
54800	3.38122
54900	3.31473
55000	3.34129
55100	3.29379
55200	3.51525
55300	3.54026
55400	3.61068
55500	3.66902
55600	3.80519
55700	3.85497
55800	3.77963
55900	3.74779
56000	3.70622
56100	3.67348
56200	3.77729
56300	3.77691
56400	3.76947
56500	3.73859
56600	3.81064
56700	3.80999
56800	3.61422
56900	3.71155
57000	3.66906
57100	3.63271
57200	3.5048
57300	3.57506
57400	3.46554
57500	3.51171
57600	3.42844
57700	3.44127
57800	3.41489
57900	3.61726
58000	3.46368
58100	3.29632
58200	3.3837
58300	3.15824
58400	3.25623
58500	3.24914
58600	3.10442
58700	3.08307
58800	3.10447
58900	3.2329
59000	3.26751
59100	3.24203
59200	3.16637
59300	3.2871
59400	3.2159
59500	3.25112
59600	3.32309
59700	3.45712
59800	3.31292
59900	3.25256
60000	3.20456
60100	3.2323
60200	3.19853
60300	3.22369
60400	3.18005
60500	3.4448
60600	3.33468
60700	3.24722
60800	3.22592
60900	3.17617
61000	3.23077
61100	3.3355
61200	3.24259
61300	3.22585
61400	3.3259
61500	3.31808
61600	3.22695
61700	3.26604
61800	3.25752
61900	3.24446
62000	3.27194
62100	3.21102
62200	3.25966
62300	3.24206
62400	3.3416
62500	3.42572
62600	3.31939
62700	3.53623
62800	3.52573
62900	3.54354
63000	3.58211
63100	3.45616
63200	3.42964
63300	3.33433
63400	3.35579
63500	3.39919
63600	3.44464
63700	3.53883
63800	3.34026
63900	3.21039
64000	3.21601
64100	3.2358
64200	3.32595
64300	3.35323
64400	3.31714
64500	3.37749
64600	3.39025
64700	3.32426
64800	3.42136
64900	3.47796
65000	3.40436
65100	3.37524
65200	3.41333
65300	3.40962
65400	3.46144
65500	3.43657
65600	3.41847
65700	3.38601
65800	3.34243
65900	3.46466
66000	3.51934
66100	3.64817
66200	3.59977
66300	3.54467
66400	3.56668
66500	3.43255
66600	3.42022
66700	3.42183
66800	3.52354
66900	3.54179
67000	3.47086
67100	3.4925
67200	3.53293
67300	3.54855
67400	3.51529
67500	3.37514
67600	3.45304
67700	3.48407
67800	3.48617
67900	3.4771
68000	3.58742
68100	3.5284
68200	3.42174
68300	3.4257
68400	3.45028
68500	3.45874
68600	3.48505
68700	3.58921
68800	3.59986
68900	3.72756
69000	3.71277
69100	3.71051
69200	3.84429
69300	3.9665
69400	3.98492
69500	3.88363
69600	3.62301
69700	3.75282
69800	3.64403
69900	3.43765
70000	3.53814
70100	3.63639
70200	3.49481
70300	3.44764
70400	3.71918
70500	3.74823
70600	3.79514
70700	3.67846
70800	3.61142
70900	3.2578
71000	3.07722
71100	3.46881
71200	3.42606
71300	3.27539
71400	3.13919
71500	3.03253
71600	2.87927
71700	2.95427
71800	3.006
71900	2.70801
72000	2.82218
72100	2.81279
72200	2.59861
72300	2.45533
72400	2.40005
72500	2.48682
72600	2.61301
72700	2.72145
72800	2.51077
72900	2.51378
73000	2.65526
73100	2.75972
73200	2.95241
73300	2.85262
73400	2.74566
73500	2.98902
73600	2.99339
73700	2.95388
73800	3.09545
73900	3.2488
74000	3.1652
74100	3.21188
74200	3.18756
74300	3.2258
74400	2.90234
74500	2.88378
74600	3.00252
74700	2.87818
74800	2.94234
74900	2.82309
75000	2.7448
75100	2.71771
75200	2.64483
75300	2.69371
75400	2.71821
75500	2.95173
75600	3.0503
75700	3.33342
75800	3.32562
75900	3.37601
76000	3.45658
76100	3.38566
76200	3.15071
76300	2.9679
76400	2.99644
76500	3.08226
76600	2.95552
76700	2.81861
76800	2.87253
76900	2.89511
77000	2.90786
77100	2.8781
77200	2.81977
77300	2.82942
77400	2.7707
77500	2.61954
77600	2.378
77700	2.5845
77800	2.4914
77900	2.60561
78000	2.59275
78100	2.60471
78200	2.6324
78300	2.68251
78400	2.5822
78500	2.64451
78600	2.59079
78700	2.85844
78800	2.57443
78900	2.61542
79000	2.43708
79100	2.42682
79200	2.26876
79300	2.6177
79400	2.45714
79500	2.3149
79600	2.29196
79700	2.30429
79800	2.33866
79900	2.39055
80000	2.36499
80100	2.55617
80200	2.56419
80300	2.67869
80400	2.69737
80500	2.70816
80600	2.80081
80700	2.82863
80800	2.89447
80900	2.77739
81000	2.87682
81100	2.93018
81200	2.88581
81300	2.84907
81400	2.86478
81500	2.90393
81600	2.94525
81700	2.93106
81800	3.01705
81900	2.92851
82000	2.97611
82100	2.9082
82200	2.99779
82300	2.94386
82400	2.84329
82500	2.8413
82600	3.11503
82700	2.9609
82800	3.00883
82900	3.0912
83000	3.11425
83100	2.99884
83200	2.98463
83300	2.82272
83400	2.76076
83500	2.86673
83600	2.89392
83700	2.77704
83800	2.85024
83900	2.60993
84000	2.8153
84100	2.67564
84200	2.68439
84300	2.51455
84400	2.47589
84500	2.36403
84600	2.37129
84700	2.32226
84800	2.23083
84900	2.48515
85000	2.46017
85100	2.67619
85200	2.74446
85300	2.83546
85400	2.86655
85500	3.0582
85600	2.99791
85700	2.83117
85800	2.79943
85900	2.81699
86000	2.91745
86100	3.0379
86200	2.90716
86300	2.77119
86400	2.92878
86500	2.99499
86600	2.91439
86700	2.90221
86800	2.94014
86900	2.86803
87000	2.79468
87100	2.97161
87200	2.95698
87300	2.87116
87400	2.81198
87500	2.76561
87600	2.7244
87700	2.80563
87800	2.91615
87900	2.77778
88000	2.86509
88100	2.46218
88200	2.67183
88300	2.82097
88400	2.8875
88500	2.85325
88600	2.8635
88700	2.86922
88800	2.72408
88900	2.73494
89000	2.6836
89100	2.57513
89200	2.71025
89300	2.97744
89400	2.93395
89500	2.85877
89600	2.97903
89700	2.92052
89800	2.90361
89900	2.6816
90000	2.67696
90100	2.8123
90200	2.88322
90300	2.67962
90400	2.87673
90500	2.76842
90600	2.68537
90700	2.70391
90800	2.67984
90900	2.69491
91000	2.61414
91100	2.92292
91200	2.81233
91300	2.79375
91400	2.74797
91500	2.90311
91600	2.81202
91700	2.69447
91800	2.69751
91900	2.72905
92000	2.81732
92100	2.8709
92200	2.7168
92300	2.67202
92400	2.69103
92500	2.81019
92600	2.77336
92700	2.67588
92800	2.92929
92900	2.84577
93000	2.8813
93100	2.82958
93200	2.96391
93300	2.86136
93400	2.82109
93500	2.64939
93600	2.5141
93700	2.52678
93800	2.47817
93900	2.67291
94000	2.65681
94100	2.66046
94200	2.64429
94300	2.7332
94400	2.77462
94500	2.74706
94600	2.47188
94700	2.38377
94800	2.49136
94900	2.57422
95000	2.47301
95100	2.33119
95200	2.49454
95300	2.45858
95400	2.52396
95500	2.73626
95600	2.74937
95700	2.90262
95800	2.865
95900	2.84336
96000	3.07586
96100	2.94447
96200	3.16802
96300	3.23891
96400	3.07757
96500	2.97338
96600	3.12069
96700	3.08422
96800	3.06133
96900	3.11084
97000	3.04213
97100	2.81304
97200	2.79986
97300	2.85161
97400	3.03218
97500	3.13763
97600	3.13715
97700	3.22379
97800	3.23611
97900	3.34782
98000	3.33677
98100	3.03187
98200	3.10669
98300	3.13988
98400	3.1946
98500	3.22964
98600	3.15116
98700	3.16627
98800	3.03158
98900	2.87897
99000	3.03065
99100	3.00106
99200	2.91574
99300	2.91595
99400	2.95976
99500	2.89361
99600	3.05045
99700	2.94499
99800	3.04784
99900	3.0395
100000	3.0295
100100	3.05879
100200	3.04237
100300	3.19734
100400	3.15629
100500	3.05564
100600	2.96823
100700	2.95968
100800	3.0146
100900	3.02081
101000	3.07068
101100	2.92881
101200	2.85819
101300	2.91775
101400	2.8708
101500	2.82162
101600	2.78511
101700	2.85527
101800	2.80787
101900	2.82368
102000	2.88441
102100	2.83372
102200	2.99055
102300	2.84217
102400	2.95575
102500	3.01374
102600	2.91099
102700	2.88739
102800	2.72802
102900	2.70967
103000	2.67687
103100	2.93027
103200	2.99525
103300	3.13883
103400	3.27889
103500	3.02033
103600	2.88606
103700	3.06636
103800	2.96913
103900	3.03026
104000	2.89148
104100	2.64219
104200	2.85088
104300	2.78153
104400	2.79357
104500	2.84223
104600	2.59473
104700	2.77102
104800	2.89671
104900	3.10732
105000	2.93481
105100	2.67441
105200	2.77653
105300	2.84812
105400	2.77389
105500	2.9282
105600	2.95585
105700	2.84774
105800	2.76077
105900	2.57829
106000	2.59488
106100	2.71699
106200	2.92442
106300	2.84606
106400	2.83295
106500	2.82657
106600	2.81699
106700	2.59522
106800	2.50211
106900	2.5558
107000	2.6314
107100	2.76473
107200	2.68538
107300	2.88875
107400	2.77441
107500	2.64502
107600	2.78255
107700	2.69606
107800	2.66821
107900	2.67704
108000	2.45483
108100	2.39562
108200	2.64631
108300	2.73007
108400	2.75466
108500	2.66827
108600	2.78512
108700	2.85504
108800	2.83933
108900	2.93536
109000	3.02499
109100	2.94555
109200	2.93251
109300	2.96922
109400	3.00222
109500	3.00402
109600	2.92901
109700	3.10506
109800	2.80384
109900	2.90798
110000	2.9205
110100	2.88754
110200	2.78649
110300	2.71243
110400	2.88302
110500	2.74915
110600	2.80938
110700	2.9428
110800	2.94141
110900	3.17145
111000	2.95634
111100	2.97977
111200	2.9774
111300	3.08938
111400	3.06443
111500	3.20067
111600	3.08708
111700	3.0975
111800	2.94331
111900	2.89075
112000	2.82425
112100	2.8304
112200	2.92884
112300	3.01056
112400	2.9689
112500	2.94896
112600	2.8048
112700	2.88617
112800	2.84875
112900	2.76017
113000	2.84472
113100	2.82669
113200	2.87633
113300	2.85813
113400	2.85071
113500	2.89234
113600	2.91522
113700	2.92999
113800	3.05846
113900	3.09761
114000	3.16344
114100	3.21687
114200	3.0943
114300	3.05768
114400	3.13577
114500	3.2589
114600	3.12694
114700	3.20756
114800	2.93035
114900	2.91285
115000	2.93241
115100	2.96966
115200	2.95977
115300	2.93053
115400	3.11664
115500	3.12634
115600	3.28911
115700	3.11786
115800	3.14557
115900	3.24044
116000	3.1112
116100	3.12775
116200	3.175
116300	3.171
116400	3.26514
116500	3.28333
116600	3.40777
116700	3.09918
116800	3.24527
116900	3.16872
117000	3.10287
117100	3.15681
117200	3.06968
117300	3.02134
117400	2.93468
117500	3.20504
117600	3.249
117700	3.31685
117800	3.24008
117900	3.11085
118000	2.991
118100	3.0588
118200	3.05193
118300	3.02488
118400	3.1236
118500	3.1858
118600	3.27156
118700	3.44701
118800	3.39142
118900	3.36076
119000	3.35665
119100	3.49661
119200	3.42509
119300	3.35231
119400	3.28649
119500	3.23791
119600	3.20152
119700	3.38993
119800	3.19891
119900	3.35819
120000	3.30124
120100	3.30976
120200	3.23496
120300	3.28372
120400	3.49646
120500	3.39136
120600	3.34892
120700	3.42815
120800	3.48264
120900	3.34929
121000	3.47744
121100	3.149
121200	3.20754
121300	3.267
121400	3.30235
121500	3.40957
121600	3.33809
121700	3.18829
121800	3.14324
121900	3.07169
122000	3.05024
122100	3.19612
122200	3.23034
122300	3.23606
122400	3.17314
122500	3.23439
122600	3.33058
122700	3.25063
122800	3.27726
122900	3.3672
123000	3.49733
123100	3.39097
123200	3.30882
123300	3.09978
123400	3.1705
123500	3.24763
123600	3.25904
123700	3.10052
123800	3.15002
123900	3.31807
124000	3.23565
124100	3.22164
124200	3.25859
124300	3.21765
124400	3.37872
124500	3.31621
124600	3.16804
124700	3.21863
124800	3.06559
124900	3.11767
125000	3.07205
125100	2.87109
125200	2.80302
125300	2.74793
125400	2.70868
125500	2.64707
125600	2.6383
125700	2.79225
125800	2.86404
125900	2.86949
126000	2.78933
126100	2.77285
126200	2.7265
126300	2.68194
126400	2.7228
126500	2.67252
126600	2.66137
126700	2.66764
126800	2.72587
126900	2.67103
127000	2.69244
127100	2.57419
127200	2.52226
127300	2.49626
127400	2.5245
127500	2.6204
127600	2.48744
127700	2.54714
127800	2.58748
127900	2.69624
128000	2.76191
128100	2.64609
128200	2.75462
128300	2.67942
128400	2.36646
128500	2.34732
128600	2.35984
128700	2.21671
128800	2.27795
128900	2.31112
129000	2.25756
129100	2.15088
129200	2.20021
129300	2.36968
129400	2.42059
129500	2.36125
129600	2.42243
129700	2.48348
129800	2.52822
129900	2.72159
130000	2.61392
130100	2.67054
130200	2.59604
130300	2.69806
130400	2.75211
130500	2.82931
130600	2.81624
130700	2.78721
130800	2.89208
130900	2.80522
131000	2.884
131100	2.90082
131200	2.85246
131300	2.79029
131400	2.84945
131500	2.86156
131600	2.82218
131700	2.82174
131800	2.80677
131900	2.80402
132000	2.83834
132100	2.82499
132200	2.81195
132300	2.75068
132400	2.72228
132500	2.79485
132600	2.87477
132700	2.88306
132800	3.01318
132900	3.05458
133000	3.08619
133100	2.9829
133200	2.98069
133300	3.05138
133400	3.10729
133500	3.04649
133600	3.03989
133700	3.00706
133800	2.95957
133900	2.94755
134000	2.98535
134100	2.91986
134200	2.99372
134300	3.02112
134400	2.96139
134500	2.89689
134600	2.96429
134700	3.03108
134800	2.97649
134900	3.01896
135000	2.958
135100	2.95722
135200	3.01633
135300	2.86116
135400	2.97177
135500	2.98757
135600	3.04534
135700	3.15085
135800	3.17405
135900	3.08943
136000	3.1255
136100	3.0197
136200	3.0594
136300	3.00913
136400	2.97448
136500	2.95527
136600	2.92193
136700	2.81639
136800	2.88047
136900	2.8591
137000	2.88255
137100	2.90301
137200	2.82225
137300	2.74852
137400	2.97364
137500	2.92853
137600	2.89979
137700	2.76966
137800	2.62261
137900	2.49355
138000	2.37124
138100	2.39733
138200	2.3801
138300	2.57966
138400	2.65903
138500	2.82011
138600	2.72195
138700	2.61318
138800	2.57552
138900	2.73586
139000	2.58685
139100	2.80668
139200	2.85797
139300	2.91947
139400	2.83148
139500	2.92314
139600	3.03462
139700	3.0567
139800	2.9322
139900	2.97292
140000	2.8505
140100	2.78398
140200	2.84364
140300	2.73389
140400	2.8764
140500	2.91561
140600	2.83974
140700	2.80368
140800	2.82046
140900	2.9785
141000	2.97035
141100	3.01219
141200	3.03104
141300	3.06561
141400	2.89733
141500	3.02438
141600	2.92533
141700	2.95237
141800	2.91755
141900	2.93274
142000	2.8413
142100	2.88695
142200	2.75709
142300	2.8427
142400	2.8834
142500	2.9235
142600	2.89785
142700	2.9436
142800	2.96149
142900	2.99221
143000	2.96615
143100	2.88778
143200	2.80817
143300	2.94384
143400	2.94193
143500	2.91342
143600	2.87442
143700	2.86653
143800	2.97825
143900	2.92677
144000	2.88792
144100	2.88344
144200	2.91716
144300	2.79771
144400	2.91324
144500	2.87432
144600	2.9471
144700	3.04552
144800	2.94382
144900	2.97476
145000	3.02769
145100	3.00542
145200	2.99705
145300	3.01203
145400	2.94199
145500	2.88425
145600	2.83076
145700	2.90743
145800	2.99334
145900	2.93463
146000	2.94186
146100	2.98867
146200	2.74486
146300	2.79583
146400	2.72493
146500	2.68565
146600	2.60954
146700	2.7403
146800	2.87013
146900	2.65506
147000	2.77703
147100	2.7517
147200	2.97773
147300	2.96244
147400	3.05828
147500	2.98462
147600	2.86133
147700	2.85486
147800	2.78817
147900	2.85819
148000	2.75925
148100	2.81897
148200	2.79001
148300	2.81565
148400	2.89104
148500	2.8377
148600	2.8094
148700	2.84509
148800	2.94467
148900	2.9575
149000	2.8125
149100	2.72471
149200	2.73412
149300	2.73968
149400	2.82955
149500	2.76974
149600	2.80282
149700	2.86886
149800	2.94969
149900	2.77772
150000	2.82576
150100	2.79401
150200	2.84082
150300	2.9536
150400	2.82226
150500	2.92995
150600	2.63785
150700	2.86366
150800	2.72047
150900	2.79521
151000	2.84041
151100	2.90736
151200	2.86317
151300	2.87438
151400	3.00661
151500	3.1059
151600	3.01079
151700	2.92677
151800	2.94547
151900	2.87203
152000	2.9481
152100	2.83141
152200	2.8752
152300	2.79459
152400	2.67933
152500	2.72572
152600	2.73593
152700	2.74545
152800	2.77381
152900	2.65182
153000	2.71953
153100	2.65231
153200	2.79274
153300	2.87798
153400	2.90897
153500	2.84533
153600	3.02251
153700	3.00407
153800	2.92869
153900	2.85628
154000	2.86249
154100	2.91361
154200	3.00777
154300	2.94436
154400	3.03234
154500	3.04382
154600	2.88861
154700	3.01641
154800	2.96244
154900	2.98543
155000	2.9506
155100	2.91336
155200	2.89094
155300	2.80642
155400	2.73613
155500	2.91295
155600	2.89238
155700	2.85664
155800	2.8551
155900	2.71788
156000	2.58177
156100	2.6328
156200	2.65398
156300	2.70902
156400	2.55942
156500	2.57014
156600	2.55355
156700	2.68187
156800	2.81206
156900	2.78759
157000	2.75137
157100	2.79921
157200	2.82701
157300	2.91685
157400	2.96755
157500	2.92941
157600	2.89049
157700	2.79037
157800	2.85373
157900	2.85884
158000	2.71971
158100	2.66711
158200	2.65317
158300	2.62467
158400	2.81403
158500	2.78712
158600	2.84309
158700	2.89091
158800	2.85746
158900	2.97062
159000	2.82811
159100	2.82902
159200	2.81452
159300	2.82652
159400	2.78688
159500	2.70592
159600	2.64458
159700	2.56461
159800	2.58982
159900	2.74248
160000	2.77375
160100	2.68841
160200	2.74999
160300	2.72928
160400	2.61197
160500	2.56705
160600	2.70507
160700	2.66056
160800	2.806
160900	2.69502
161000	2.74682
161100	2.7129
161200	2.53985
161300	2.7345
161400	2.69362
161500	2.52845
161600	2.57981
161700	2.61011
161800	2.41652
161900	2.36606
162000	2.43439
162100	2.39339
162200	2.29736
162300	2.38987
162400	2.33465
162500	2.48053
162600	2.61584
162700	2.74825
162800	2.75171
162900	2.7233
163000	2.79254
163100	2.83747
163200	2.80957
163300	2.7344
163400	2.8244
163500	2.88117
163600	2.8
163700	2.69404
163800	2.67308
163900	2.6918
164000	2.80095
164100	2.83528
164200	2.8588
164300	2.93891
164400	2.75944
164500	2.7734
164600	2.68754
164700	2.66735
164800	2.61903
164900	2.608
165000	2.65632
165100	2.58106
165200	2.52415
165300	2.57572
165400	2.71554
165500	2.5821
165600	2.62256
165700	2.78052
165800	2.7234
165900	2.60827
166000	2.68649
166100	2.72729
166200	2.70196
166300	2.77112
166400	2.75695
166500	2.79973
166600	2.75426
166700	2.76231
166800	2.79047
166900	2.82061
167000	2.91131
167100	2.95497
167200	2.67481
167300	2.80574
167400	2.70841
167500	2.69664
167600	2.65086
167700	2.70034
167800	2.68441
167900	2.65221
168000	2.78134
168100	2.68437
168200	2.57616
168300	2.71049
168400	2.73901
168500	2.64089
168600	2.55258
168700	2.53985
168800	2.70984
168900	2.67424
169000	2.87621
169100	2.76399
169200	2.68186
169300	2.6267
169400	2.4793
169500	2.54541
169600	2.64757
169700	2.54919
169800	2.4737
169900	2.45025
170000	2.24209
170100	2.3766
170200	2.38352
170300	2.21634
170400	2.42793
170500	2.22777
170600	2.40571
170700	2.40194
170800	2.37222
170900	2.4054
171000	2.34085
171100	2.4626
171200	2.34515
171300	2.38478
171400	2.42195
171500	2.43638
171600	2.54761
171700	2.45389
171800	2.46807
171900	2.50092
172000	2.47798
172100	2.41768
172200	2.52396
172300	2.39017
172400	2.42423
172500	2.5038
172600	2.45946
172700	2.52124
172800	2.59854
172900	2.58648
173000	2.48392
173100	2.64886
173200	2.6002
173300	2.48209
173400	2.68075
173500	2.79893
173600	2.77874
173700	2.73371
173800	2.63274
173900	2.65062
174000	2.66973
174100	2.50229
174200	2.55157
174300	2.51029
174400	2.65382
174500	2.64249
174600	2.69836
174700	2.64278
174800	2.7595
174900	2.88381
175000	2.89209
175100	2.80517
175200	2.76838
175300	2.76399
175400	2.8265
175500	2.765
175600	2.86074
175700	2.71167
175800	2.59402
175900	2.65928
176000	2.61443
176100	2.72111
176200	2.79252
176300	2.84375
176400	2.86649
176500	2.68668
176600	2.78901
176700	2.90109
176800	2.85369
176900	2.93673
177000	2.90583
177100	3.04335
177200	3.1084
177300	3.04238
177400	2.97718
177500	3.0304
177600	2.95975
177700	3.02266
177800	2.89573
177900	2.90333
178000	2.81528
178100	2.72858
178200	2.81905
178300	2.779
178400	2.7487
178500	2.60953
178600	2.86457
178700	2.65722
178800	2.64876
178900	2.7334
179000	2.66834
179100	2.77975
179200	2.90713
179300	2.93629
179400	2.74195
179500	2.81641
179600	2.70391
179700	2.86219
179800	2.8132
179900	2.76357
180000	2.53777
180100	2.70027
180200	2.66718
180300	2.73795
180400	2.68631
180500	2.79603
180600	2.79549
180700	2.83498
180800	2.72639
180900	2.74772
181000	2.82074
181100	2.77495
181200	2.73523
181300	2.70258
181400	2.76451
181500	2.81519
181600	2.83472
181700	2.87941
181800	2.85811
181900	2.88637
182000	3.14406
182100	2.96177
182200	3.01064
182300	2.98216
182400	2.90843
182500	2.79221
182600	2.8431
182700	2.84344
182800	2.81546
182900	2.81844
183000	3.08336
183100	3.00133
183200	3.00773
183300	2.89307
183400	3.11116
183500	2.99873
183600	2.88381
183700	2.8734
183800	2.74474
183900	2.79781
184000	2.85378
184100	2.84103
184200	2.73381
184300	2.93542
184400	2.89614
184500	2.98257
184600	2.86931
184700	2.85868
184800	2.8734
184900	2.81703
185000	2.83763
185100	2.77861
185200	2.86693
185300	2.84077
185400	2.83031
185500	2.94045
185600	2.81765
185700	2.87743
185800	2.92737
185900	2.90961
186000	2.94654
186100	2.99011
186200	3.02554
186300	2.95615
186400	3.06267
186500	2.95783
186600	2.85537
186700	2.83924
186800	2.85622
186900	2.93146
187000	2.94355
187100	2.9219
187200	2.88774
187300	2.8739
187400	2.8956
187500	2.90732
187600	2.88494
187700	2.90276
187800	2.8875
187900	2.8993
188000	2.85558
188100	2.89661
188200	2.84905
188300	2.79739
188400	2.84063
188500	2.93644
188600	2.84992
188700	2.90801
188800	2.82815
188900	2.93176
189000	2.96571
189100	3.03392
189200	2.87347
189300	2.98841
189400	2.85986
189500	2.91863
189600	2.90486
189700	2.92669
189800	2.86046
189900	2.81417
190000	2.90459
190100	2.87997
190200	2.86972
190300	2.88399
190400	2.86769
190500	2.96376
190600	2.87404
190700	2.93988
190800	2.94883
190900	2.87561
191000	2.8341
191100	2.86136
191200	2.92469
191300	2.93884
191400	3.07452
191500	2.95745
191600	2.96423
191700	2.874
191800	2.87185
191900	2.84415
192000	2.87376
192100	2.87492
192200	2.89972
192300	2.84962
192400	2.90658
192500	2.9659
192600	3.04785
192700	2.83565
192800	2.83001
192900	2.95892
193000	2.86685
193100	2.88215
193200	2.86253
193300	2.88401
193400	2.91508
193500	2.8885
193600	2.89828
193700	2.9373
193800	2.92758
193900	2.98628
194000	2.8657
194100	2.88033
194200	2.98348
194300	2.89334
194400	2.93392
194500	2.92196
194600	2.95771
194700	2.9828
194800	3.07566
194900	2.96624
195000	2.92418
195100	2.9755
195200	3.04224
195300	3.00594
195400	2.83987
195500	2.8663
195600	2.87483
195700	2.96852
195800	2.89146
195900	2.99975
196000	2.96419
196100	3.05879
196200	3.00028
196300	2.98911
196400	2.94232
196500	3.02404
196600	2.97775
196700	3.04446
196800	2.9494
196900	2.96196
197000	2.92257
197100	3.00014
197200	2.92021
197300	2.90396
197400	2.93381
197500	2.97938
197600	2.94665
197700	2.96956
197800	2.96477
197900	2.91729
198000	2.91994
198100	2.94336
198200	2.90775
198300	2.93897
198400	2.89338
198500	2.9251
198600	3.02841
198700	2.96484
198800	3.01885
198900	2.98776
199000	3.0482
199100	3.02703
199200	2.90955
199300	2.96004
199400	3.02421
199500	3.0034
199600	2.89703
199700	2.92122
199800	2.97485
[truncated: 12,303 more rows]
