# Supplementary material for: Discovery of a heparan sulfate binding domain in monkeypox virus H3 as an anti-poxviral drug target combining AI and MD simulations
Source: eLife. 2025 Jan 16;13:RP100545. doi: 10.7554/eLife.100545 (PMC11737874; doi:10.7554/eLife.100545)
Supplement: Figure 2—source data 6. [file elife-100545-fig2-data6.xlsx]

## Sheet: Sheet1
Time (ns)	RMSD (nm)
0	6e-07
100	0.248328
200	0.257135
300	0.302344
400	0.344996
500	0.385063
600	0.363618
700	0.347045
800	0.347635
900	0.351938
1000	0.37987
1100	0.376688
1200	0.380003
1300	0.404907
1400	0.425442
1500	0.497167
1600	0.569304
1700	0.542509
1800	0.684869
1900	0.602708
2000	0.650529
2100	0.694483
2200	0.674283
2300	0.723577
2400	0.597737
2500	0.651409
2600	0.657267
2700	0.552354
2800	0.630058
2900	0.683698
3000	0.727012
3100	0.711787
3200	0.780703
3300	0.752193
3400	0.764144
3500	0.739847
3600	0.716781
3700	0.611714
3800	0.628591
3900	0.652559
4000	0.625806
4100	0.644123
4200	0.797435
4300	0.834764
4400	0.741619
4500	0.860178
4600	0.899637
4700	0.822858
4800	0.804373
4900	0.934536
5000	0.941703
5100	0.776776
5200	0.785832
5300	0.812981
5400	0.851327
5500	0.83714
5600	0.940072
5700	0.979963
5800	1.05023
5900	0.939779
6000	1.00621
6100	0.958041
6200	0.930979
6300	0.931338
6400	0.934413
6500	0.900403
6600	0.917757
6700	0.895459
6800	0.977576
6900	0.930199
7000	1.047
7100	1.00684
7200	1.10389
7300	0.97741
7400	0.922712
7500	1.06206
7600	0.997471
7700	1.04459
7800	0.976488
7900	0.954875
8000	1.13956
8100	1.23878
8200	1.22908
8300	1.35407
8400	1.24561
8500	1.30531
8600	1.41896
8700	1.58813
8800	1.60372
8900	1.66165
9000	1.68974
9100	1.6171
9200	1.67376
9300	1.7
9400	1.69372
9500	1.76506
9600	1.60662
9700	1.54593
9800	1.69992
9900	1.70534
10000	1.7591
10100	1.70651
10200	1.58378
10300	1.47781
10400	1.33065
10500	1.24361
10600	1.08081
10700	1.24966
10800	1.2833
10900	1.12881
11000	1.10165
11100	1.19134
11200	1.3278
11300	1.25659
11400	1.53998
11500	1.45601
11600	1.39063
11700	1.22512
11800	1.16716
11900	1.22757
12000	1.17054
12100	1.23025
12200	1.26734
12300	1.31338
12400	1.55187
12500	1.52968
12600	1.48326
12700	1.58289
12800	1.57551
12900	1.82117
13000	1.72535
13100	1.71673
13200	1.55638
13300	1.66087
13400	1.59676
13500	1.67525
13600	1.47726
13700	1.55842
13800	1.54983
13900	1.58414
14000	1.4808
14100	1.58494
14200	1.73431
14300	1.74345
14400	1.45902
14500	1.43786
14600	1.45463
14700	1.60164
14800	1.53684
14900	1.51826
15000	1.53091
15100	1.51931
15200	1.50882
15300	1.38039
15400	1.47649
15500	1.44143
15600	1.47729
15700	1.5118
15800	1.48829
15900	1.8344
16000	1.93519
16100	1.86662
16200	1.96956
16300	2.20588
16400	2.41935
16500	2.5024
16600	2.20143
16700	2.14499
16800	2.37773
16900	2.09544
17000	2.3358
17100	2.36822
17200	2.65607
17300	2.76008
17400	2.79953
17500	2.88455
17600	2.56847
17700	2.49891
17800	2.68893
17900	2.75421
18000	2.66722
18100	2.47346
18200	2.44638
18300	2.45981
18400	2.48454
18500	2.40536
18600	2.38156
18700	2.84215
18800	3.04673
18900	3.10235
19000	3.04043
19100	3.07801
19200	3.10091
19300	3.13048
19400	2.89795
19500	3.1533
19600	3.06451
19700	3.14062
19800	2.97961
19900	2.77824
20000	2.85216
20100	2.93059
20200	3.15128
20300	2.93218
20400	3.16723
20500	3.17733
20600	3.23634
20700	3.10223
20800	3.2815
20900	3.39754
21000	3.47918
21100	3.40482
21200	3.36703
21300	3.32996
21400	3.50341
21500	3.43953
21600	3.40594
21700	3.35897
21800	3.65133
21900	3.7489
22000	3.91756
22100	3.68633
22200	3.79782
22300	3.69788
22400	3.91277
22500	3.97176
22600	3.92388
22700	4.0947
22800	3.85341
22900	3.86264
23000	3.91012
23100	3.99474
23200	3.90526
23300	3.5915
23400	3.33716
23500	3.20022
23600	3.30548
23700	3.27658
23800	3.28027
23900	3.23754
24000	3.25534
24100	3.32533
24200	3.30987
24300	3.36043
24400	3.43951
24500	3.42207
24600	3.35859
24700	3.51918
24800	3.55229
24900	3.6715
25000	3.59572
25100	3.53862
25200	3.74619
25300	3.64792
25400	3.60873
25500	3.68277
25600	3.5953
25700	3.45945
25800	3.4332
25900	3.37607
26000	3.38607
26100	3.42611
26200	3.47503
26300	3.29474
26400	3.20246
26500	3.25723
26600	3.13722
26700	3.14127
26800	3.18757
26900	3.21149
27000	3.17625
27100	3.10407
27200	3.16509
27300	3.24695
27400	3.29878
27500	3.24894
27600	3.27719
27700	3.27293
27800	3.24823
27900	3.31321
28000	3.3082
28100	3.26095
28200	3.31278
28300	3.28133
28400	3.15869
28500	3.2278
28600	3.16829
28700	3.26155
28800	3.22409
28900	3.21897
29000	3.24552
29100	3.36169
29200	3.3385
29300	3.31634
29400	3.42985
29500	3.36562
29600	3.28405
29700	3.29541
29800	3.41216
29900	3.27971
30000	3.2682
30100	3.28264
30200	3.28841
30300	3.30721
30400	3.37557
30500	3.40487
30600	3.31816
30700	3.2818
30800	3.3104
30900	3.38289
31000	3.34386
31100	3.42057
31200	3.42321
31300	3.39298
31400	3.49264
31500	3.48311
31600	3.53114
31700	3.54746
31800	3.58673
31900	3.59156
32000	3.51738
32100	3.55043
32200	3.51361
32300	3.5608
32400	3.55573
32500	3.48419
32600	3.63662
32700	3.52868
32800	3.49943
32900	3.50448
33000	3.57567
33100	3.56207
33200	3.6885
33300	3.72994
33400	3.4893
33500	3.34556
33600	3.48812
33700	3.55832
33800	3.47412
33900	3.54987
34000	3.50766
34100	3.56524
34200	3.60828
34300	3.64836
34400	3.57461
34500	3.65664
34600	3.62178
34700	3.39843
34800	3.45384
34900	3.38109
35000	3.33534
35100	3.49422
35200	3.54239
35300	3.47187
35400	3.41896
35500	3.25058
35600	3.36355
35700	3.13129
35800	3.17571
35900	3.13405
36000	3.25978
36100	3.15213
36200	2.99669
36300	2.95091
36400	3.07868
36500	3.12881
36600	3.08216
36700	3.1353
36800	3.19218
36900	3.26962
37000	3.53055
37100	3.58741
37200	3.31345
37300	3.2015
37400	3.11978
37500	3.22817
37600	3.24293
37700	3.33354
37800	3.24829
37900	3.14512
38000	3.16029
38100	3.40718
38200	3.33968
38300	3.49954
38400	3.50411
38500	3.4491
38600	3.35525
38700	3.34744
38800	3.19893
38900	3.26254
39000	3.36017
39100	3.08935
39200	3.254
39300	3.39245
39400	3.22087
39500	3.30687
39600	3.41832
39700	3.05915
39800	2.91291
39900	2.90392
40000	3.12976
40100	2.72741
40200	2.84647
40300	2.86264
40400	2.89678
40500	2.80756
40600	2.69602
40700	2.74039
40800	2.75585
40900	2.62752
41000	2.87037
41100	2.99896
41200	2.94395
41300	2.83091
41400	2.93083
41500	2.89795
41600	3.17562
41700	3.40526
41800	3.26128
41900	3.21135
42000	2.88528
42100	2.91779
42200	2.94314
42300	3.11561
42400	3.12104
42500	3.04901
42600	3.25044
42700	3.29805
42800	3.25226
42900	3.48582
43000	3.42141
43100	3.49178
43200	3.54418
43300	3.51929
43400	3.49067
43500	3.53273
43600	3.4352
43700	3.73769
43800	3.71654
43900	3.39433
44000	3.34871
44100	3.43926
44200	3.45378
44300	3.44938
44400	3.30141
44500	3.34187
44600	3.19428
44700	3.39582
44800	3.16614
44900	3.0225
45000	3.20337
45100	3.09613
45200	3.11016
45300	3.12809
45400	3.22736
45500	3.30523
45600	3.15064
45700	3.21351
45800	3.23792
45900	3.20999
46000	3.29117
46100	3.20162
46200	3.16599
46300	3.2125
46400	3.21185
46500	3.18199
46600	3.17039
46700	3.24227
46800	3.2233
46900	3.26107
47000	3.18848
47100	3.30458
47200	3.33353
47300	3.29102
47400	3.23258
47500	3.22559
47600	3.15844
47700	3.2184
47800	3.14743
47900	3.14267
48000	3.0802
48100	3.24167
48200	3.28696
48300	3.17339
48400	3.16558
48500	3.24157
48600	3.26813
48700	3.29538
48800	3.32796
48900	3.40589
49000	3.2867
49100	3.30785
49200	3.12178
49300	3.14123
49400	3.12429
49500	3.16895
49600	3.26008
49700	3.30611
49800	3.24417
49900	3.24896
50000	3.26786
50100	3.1464
50200	3.1873
50300	3.36319
50400	3.34532
50500	3.36898
50600	3.33588
50700	3.28237
50800	3.35865
50900	3.37379
51000	3.50953
51100	3.56215
51200	3.4089
51300	3.52382
51400	3.35132
51500	3.31841
51600	3.27879
51700	3.22505
51800	3.38457
51900	3.2807
52000	3.44727
52100	3.40938
52200	3.49211
52300	3.50748
52400	3.29233
52500	3.31209
52600	3.38858
52700	3.44109
52800	3.48768
52900	3.43418
53000	3.58325
53100	3.50242
53200	3.56149
53300	3.65941
53400	3.45995
53500	3.41373
53600	3.34544
53700	3.39228
53800	3.27375
53900	3.17277
54000	3.13848
54100	3.13778
54200	2.88216
54300	2.97178
54400	2.96055
54500	2.88874
54600	3.24644
54700	3.39995
54800	3.38155
54900	3.3151
55000	3.34175
55100	3.29423
55200	3.51568
55300	3.54073
55400	3.61116
55500	3.66959
55600	3.80565
55700	3.85535
55800	3.78012
55900	3.74833
56000	3.70673
56100	3.67393
56200	3.77781
56300	3.77748
56400	3.76998
56500	3.73904
56600	3.81118
56700	3.81059
56800	3.61449
56900	3.71202
57000	3.66962
57100	3.63322
57200	3.50524
57300	3.57563
57400	3.46613
57500	3.51233
57600	3.42892
57700	3.44194
57800	3.41547
57900	3.61774
58000	3.46431
58100	3.29685
58200	3.38436
58300	3.15877
58400	3.25686
58500	3.24975
58600	3.10496
58700	3.08357
58800	3.10503
58900	3.23338
59000	3.26809
59100	3.24259
59200	3.16694
59300	3.28771
59400	3.21646
59500	3.25171
59600	3.32366
59700	3.45772
59800	3.31357
59900	3.25319
60000	3.20524
60100	3.23283
60200	3.19898
60300	3.22429
60400	3.18064
60500	3.44542
60600	3.33527
60700	3.24797
60800	3.22643
60900	3.17675
61000	3.23131
61100	3.33586
61200	3.24291
61300	3.22626
61400	3.3264
61500	3.31859
61600	3.2274
61700	3.26652
61800	3.25799
61900	3.24478
62000	3.27236
62100	3.21141
62200	3.26003
62300	3.24229
62400	3.34197
62500	3.42618
62600	3.3198
62700	3.53652
62800	3.52617
62900	3.54387
63000	3.58252
63100	3.45653
63200	3.43003
63300	3.33474
63400	3.35619
63500	3.3995
63600	3.44516
63700	3.53927
63800	3.34073
63900	3.2109
64000	3.21651
64100	3.23627
64200	3.32633
64300	3.35382
64400	3.31759
64500	3.37791
64600	3.39063
64700	3.32474
64800	3.42199
64900	3.47848
65000	3.40481
65100	3.37579
65200	3.41387
65300	3.41016
65400	3.46179
65500	3.43694
65600	3.41889
65700	3.38651
65800	3.34264
65900	3.46494
66000	3.51971
66100	3.64861
66200	3.60019
66300	3.54501
66400	3.56717
66500	3.43305
66600	3.4205
66700	3.42217
66800	3.52399
66900	3.54219
67000	3.47124
67100	3.49289
67200	3.53352
67300	3.54907
67400	3.51577
67500	3.37549
67600	3.45336
67700	3.48447
67800	3.4865
67900	3.47729
68000	3.58787
68100	3.52884
68200	3.42202
68300	3.42606
68400	3.45057
68500	3.45908
68600	3.48544
68700	3.58976
68800	3.60047
68900	3.72812
69000	3.71332
69100	3.71121
69200	3.84488
69300	3.96697
69400	3.98546
69500	3.88414
69600	3.62358
69700	3.75344
69800	3.64463
69900	3.43811
70000	3.53868
70100	3.63695
70200	3.49534
70300	3.44808
70400	3.71961
70500	3.74858
70600	3.79586
70700	3.67892
70800	3.61182
70900	3.25809
71000	3.07755
71100	3.46921
71200	3.42649
71300	3.27598
71400	3.13954
71500	3.03299
71600	2.87982
71700	2.95466
71800	3.00639
71900	2.7084
72000	2.82254
72100	2.81305
72200	2.59878
72300	2.45554
72400	2.40011
72500	2.48697
72600	2.61324
72700	2.72164
72800	2.51094
72900	2.51401
73000	2.65541
73100	2.75998
73200	2.9527
73300	2.8529
73400	2.7459
73500	2.98953
73600	2.99381
73700	2.95431
73800	3.09595
73900	3.24941
74000	3.16571
74100	3.21231
74200	3.18808
74300	3.22618
74400	2.90273
74500	2.88417
74600	3.00285
74700	2.87847
74800	2.94269
74900	2.82347
75000	2.74518
75100	2.71811
75200	2.64507
75300	2.69385
75400	2.71848
75500	2.95209
75600	3.05085
75700	3.33376
75800	3.32611
75900	3.37655
76000	3.45716
76100	3.38603
76200	3.15107
76300	2.96835
76400	2.99681
76500	3.08257
76600	2.95596
76700	2.81892
76800	2.87281
76900	2.89536
77000	2.90826
77100	2.87838
77200	2.82002
77300	2.82975
77400	2.77084
77500	2.61975
77600	2.3781
77700	2.58466
77800	2.49149
77900	2.6058
78000	2.59294
78100	2.60485
78200	2.63258
78300	2.6828
78400	2.58272
78500	2.64501
78600	2.59138
78700	2.85902
78800	2.575
78900	2.61588
79000	2.43763
79100	2.42743
79200	2.26926
79300	2.61832
79400	2.45768
79500	2.31543
79600	2.29253
79700	2.30481
79800	2.3391
79900	2.39119
80000	2.36555
80100	2.55672
80200	2.5647
80300	2.67928
80400	2.6978
80500	2.70851
80600	2.80122
80700	2.82904
80800	2.89482
80900	2.77776
81000	2.87738
81100	2.93084
81200	2.88646
81300	2.84986
81400	2.86563
81500	2.90473
81600	2.94578
81700	2.93168
81800	3.0177
81900	2.92905
82000	2.97676
82100	2.90877
82200	2.99853
82300	2.94441
82400	2.84385
82500	2.8419
82600	3.11575
82700	2.96163
82800	3.00965
82900	3.09206
83000	3.11507
83100	2.99963
83200	2.98536
83300	2.82334
83400	2.76138
83500	2.86739
83600	2.8946
83700	2.77758
83800	2.85092
83900	2.61056
84000	2.81589
84100	2.6763
84200	2.68507
84300	2.5152
84400	2.47655
84500	2.36459
84600	2.3718
84700	2.32265
84800	2.23135
84900	2.48584
85000	2.46068
85100	2.67681
85200	2.74505
85300	2.83607
85400	2.86704
85500	3.05874
85600	2.99839
85700	2.83186
85800	2.80016
85900	2.81757
86000	2.91794
86100	3.03864
86200	2.90782
86300	2.77173
86400	2.92942
86500	2.99582
86600	2.91507
86700	2.90279
86800	2.94062
86900	2.86863
87000	2.79525
87100	2.97229
87200	2.95758
87300	2.87173
87400	2.81264
87500	2.76608
87600	2.72489
87700	2.80615
87800	2.91673
87900	2.77829
88000	2.86567
88100	2.46274
88200	2.67238
88300	2.8216
88400	2.8883
88500	2.85389
88600	2.86426
88700	2.86968
88800	2.72461
88900	2.7356
89000	2.68418
89100	2.57576
89200	2.71083
89300	2.97817
89400	2.93456
89500	2.85933
89600	2.97954
89700	2.92097
89800	2.90404
89900	2.68208
90000	2.67752
90100	2.81279
90200	2.88383
90300	2.67999
90400	2.87718
90500	2.76885
90600	2.68585
90700	2.70434
90800	2.68039
90900	2.69534
91000	2.61455
91100	2.92341
91200	2.81275
91300	2.79409
91400	2.74841
91500	2.90342
91600	2.81231
91700	2.69489
91800	2.69792
91900	2.72955
92000	2.81775
92100	2.87138
92200	2.71722
92300	2.67259
92400	2.69147
92500	2.81063
92600	2.77375
92700	2.67624
92800	2.92967
92900	2.84617
93000	2.88157
93100	2.83002
93200	2.96435
93300	2.86175
93400	2.82161
93500	2.64988
93600	2.51456
93700	2.52726
93800	2.47863
93900	2.67332
94000	2.65734
94100	2.66093
94200	2.6447
94300	2.73375
94400	2.77526
94500	2.74777
94600	2.4724
94700	2.3842
94800	2.49158
94900	2.57453
95000	2.47331
95100	2.33145
95200	2.49474
95300	2.45891
95400	2.52433
95500	2.7367
95600	2.74976
95700	2.90303
95800	2.86528
95900	2.84377
96000	3.07644
96100	2.94497
96200	3.16836
96300	3.23939
96400	3.07812
96500	2.97369
96600	3.12104
96700	3.08464
96800	3.06174
96900	3.11135
97000	3.04273
97100	2.81372
97200	2.80052
97300	2.85215
97400	3.0328
97500	3.13813
97600	3.13788
97700	3.22443
97800	3.2367
97900	3.34842
98000	3.33739
98100	3.03247
98200	3.10707
98300	3.14026
98400	3.19497
98500	3.23011
98600	3.15171
98700	3.16663
98800	3.03209
98900	2.87947
99000	3.03128
99100	3.00145
99200	2.91618
99300	2.91646
99400	2.96008
99500	2.89395
99600	3.05081
99700	2.94542
99800	3.04827
99900	3.03997
100000	3.03001
100100	3.05925
100200	3.04293
100300	3.19785
100400	3.15676
100500	3.05617
100600	2.96858
100700	2.96026
100800	3.01513
100900	3.0214
101000	3.07129
101100	2.92925
101200	2.85872
101300	2.9182
101400	2.87123
101500	2.82217
101600	2.78561
101700	2.85566
101800	2.80834
101900	2.82407
102000	2.88494
102100	2.83397
102200	2.99084
102300	2.84246
102400	2.95619
102500	3.01419
102600	2.91148
102700	2.88791
102800	2.72858
102900	2.71009
103000	2.67723
103100	2.93079
103200	2.99577
103300	3.13952
103400	3.27952
103500	3.02094
103600	2.88663
103700	3.0669
103800	2.96958
103900	3.03079
104000	2.89189
104100	2.64259
104200	2.8514
104300	2.78211
104400	2.79407
104500	2.84273
104600	2.59521
104700	2.77151
104800	2.89736
104900	3.10778
105000	2.93516
105100	2.67477
105200	2.77693
105300	2.84848
105400	2.77416
105500	2.92854
105600	2.95637
105700	2.84806
105800	2.76109
105900	2.57859
106000	2.59533
106100	2.71733
106200	2.92499
106300	2.8465
106400	2.83329
106500	2.82712
106600	2.81738
106700	2.59565
106800	2.50256
106900	2.55626
107000	2.63175
107100	2.7652
107200	2.68577
107300	2.88907
107400	2.77478
107500	2.64526
107600	2.78284
107700	2.69628
107800	2.66869
107900	2.67735
108000	2.45515
108100	2.39585
108200	2.64672
108300	2.73048
108400	2.75523
108500	2.66878
108600	2.78567
108700	2.85562
108800	2.83987
108900	2.93588
109000	3.02557
109100	2.94618
109200	2.93316
109300	2.96979
109400	3.00273
109500	3.00449
109600	2.92956
109700	3.10549
109800	2.8043
109900	2.90846
110000	2.92104
110100	2.88795
110200	2.78711
110300	2.71298
110400	2.8835
110500	2.74946
110600	2.80972
110700	2.94321
110800	2.94185
110900	3.17193
111000	2.95671
111100	2.98016
111200	2.97769
111300	3.08974
111400	3.0649
111500	3.20126
111600	3.08751
111700	3.098
111800	2.94378
111900	2.89122
112000	2.8249
112100	2.83094
112200	2.92959
112300	3.01111
112400	2.96961
112500	2.94951
112600	2.80542
112700	2.88675
112800	2.84947
112900	2.76073
113000	2.84532
113100	2.82729
113200	2.87683
113300	2.85874
113400	2.85133
113500	2.89296
113600	2.91585
113700	2.93062
113800	3.05915
113900	3.09812
114000	3.16409
114100	3.2174
114200	3.09493
114300	3.05825
114400	3.13626
114500	3.25953
114600	3.12755
114700	3.20811
114800	2.9308
114900	2.91317
115000	2.93295
115100	2.97009
115200	2.96014
115300	2.93098
115400	3.11696
115500	3.12677
115600	3.28977
115700	3.11833
115800	3.14611
115900	3.24097
116000	3.11165
116100	3.1283
116200	3.17545
116300	3.17144
116400	3.26565
116500	3.28388
116600	3.40846
116700	3.09968
116800	3.24581
116900	3.16923
117000	3.10338
117100	3.15734
117200	3.07017
117300	3.02179
117400	2.93514
117500	3.20556
117600	3.24955
117700	3.31735
117800	3.24047
117900	3.11135
118000	2.99147
118100	3.05925
118200	3.05227
118300	3.0253
118400	3.12417
118500	3.18636
118600	3.2721
118700	3.44748
118800	3.39191
118900	3.36136
119000	3.35715
119100	3.49705
119200	3.42556
119300	3.35279
119400	3.28694
119500	3.23828
119600	3.20207
119700	3.39058
119800	3.19946
119900	3.35883
120000	3.30181
120100	3.31038
120200	3.23562
120300	3.28451
120400	3.49735
120500	3.39204
120600	3.3497
120700	3.42881
120800	3.48324
120900	3.34995
121000	3.47817
121100	3.14957
121200	3.20799
121300	3.26743
121400	3.30289
121500	3.40994
121600	3.33849
121700	3.18872
121800	3.14362
121900	3.07207
122000	3.05084
122100	3.19664
122200	3.23094
122300	3.23654
122400	3.17373
122500	3.23497
122600	3.33126
122700	3.25111
122800	3.27789
122900	3.36774
123000	3.49784
123100	3.39158
123200	3.30941
123300	3.10029
123400	3.17095
123500	3.24822
123600	3.25957
123700	3.101
123800	3.1505
123900	3.31856
124000	3.23627
124100	3.22215
124200	3.25921
124300	3.21833
124400	3.37944
124500	3.31671
124600	3.1684
124700	3.21892
124800	3.06606
124900	3.11812
125000	3.07252
125100	2.87145
125200	2.80343
125300	2.7482
125400	2.70908
125500	2.64741
125600	2.63853
125700	2.79251
125800	2.86444
125900	2.86993
126000	2.78973
126100	2.77319
126200	2.72684
126300	2.68235
126400	2.7233
126500	2.67287
126600	2.66181
126700	2.66802
126800	2.72637
126900	2.67143
127000	2.69297
127100	2.57465
127200	2.52268
127300	2.49665
127400	2.52489
127500	2.62093
127600	2.48781
127700	2.54748
127800	2.58782
127900	2.69667
128000	2.76241
128100	2.64651
128200	2.75494
128300	2.67975
128400	2.36674
128500	2.34766
128600	2.36027
128700	2.21695
128800	2.27828
128900	2.31145
129000	2.25786
129100	2.15109
129200	2.20041
129300	2.37003
129400	2.42104
129500	2.3615
129600	2.42279
129700	2.4838
129800	2.52874
129900	2.7221
130000	2.61426
130100	2.67089
130200	2.5964
130300	2.69841
130400	2.7526
130500	2.82974
130600	2.81675
130700	2.78755
130800	2.89243
130900	2.80575
131000	2.8845
131100	2.90141
131200	2.85301
131300	2.79082
131400	2.84999
131500	2.86207
131600	2.82276
131700	2.82221
131800	2.80735
131900	2.80456
132000	2.83878
132100	2.82544
132200	2.81236
132300	2.75099
132400	2.7227
132500	2.79527
132600	2.87515
132700	2.88353
132800	3.01374
132900	3.05517
133000	3.08664
133100	2.98337
133200	2.98099
133300	3.05182
133400	3.10778
133500	3.04697
133600	3.0403
133700	3.00736
133800	2.95992
133900	2.94803
134000	2.98588
134100	2.92019
134200	2.99422
134300	3.02151
134400	2.96181
134500	2.89722
134600	2.96458
134700	3.03147
134800	2.97687
134900	3.01946
135000	2.95843
135100	2.9576
135200	3.01683
135300	2.86154
135400	2.97221
135500	2.98801
135600	3.04579
135700	3.15123
135800	3.17459
135900	3.08998
136000	3.12614
136100	3.02026
136200	3.06003
136300	3.00968
136400	2.9749
136500	2.95566
136600	2.92242
136700	2.81686
136800	2.88099
136900	2.85954
137000	2.88301
137100	2.90345
137200	2.82255
137300	2.74883
137400	2.97419
137500	2.92908
137600	2.90001
137700	2.77005
137800	2.62312
137900	2.49389
138000	2.37136
138100	2.39752
138200	2.38037
138300	2.57989
138400	2.6593
138500	2.82056
138600	2.72241
138700	2.61359
138800	2.57583
138900	2.73619
139000	2.58723
139100	2.80728
139200	2.85848
139300	2.91982
139400	2.83184
139500	2.9235
139600	3.03508
139700	3.05724
139800	2.93261
139900	2.97328
140000	2.85073
140100	2.78432
140200	2.84397
140300	2.73421
140400	2.87662
140500	2.91601
140600	2.8402
140700	2.80403
140800	2.82069
140900	2.9788
141000	2.97061
141100	3.01259
141200	3.03143
141300	3.06611
141400	2.89777
141500	3.02476
141600	2.9257
141700	2.95266
141800	2.91793
141900	2.93303
142000	2.84164
142100	2.88717
142200	2.75743
142300	2.84294
142400	2.88368
142500	2.9238
142600	2.89828
142700	2.94406
142800	2.96201
142900	2.99266
143000	2.96677
143100	2.88823
143200	2.80843
143300	2.94428
143400	2.94239
143500	2.91376
143600	2.87481
143700	2.86686
143800	2.97865
143900	2.92722
144000	2.88812
144100	2.88367
144200	2.91749
144300	2.79782
144400	2.91361
144500	2.87461
144600	2.9473
144700	3.04583
144800	2.94417
144900	2.97501
145000	3.02813
145100	3.00578
145200	2.9974
145300	3.01237
145400	2.9423
145500	2.88458
145600	2.8311
145700	2.90758
145800	2.99365
145900	2.93474
146000	2.94213
146100	2.98881
146200	2.74507
146300	2.79611
146400	2.72517
146500	2.68574
146600	2.60977
146700	2.74061
146800	2.8704
146900	2.65529
147000	2.77726
147100	2.75184
147200	2.97791
147300	2.96255
147400	3.0586
147500	2.98479
147600	2.86161
147700	2.85508
147800	2.78837
147900	2.85857
148000	2.75958
148100	2.8192
148200	2.79014
148300	2.81584
148400	2.8913
148500	2.83819
148600	2.8099
148700	2.84541
148800	2.94497
148900	2.95789
149000	2.81285
149100	2.7251
149200	2.73451
149300	2.74009
149400	2.82991
149500	2.77003
149600	2.80318
149700	2.86908
149800	2.95021
149900	2.77809
150000	2.82583
150100	2.79433
150200	2.84124
150300	2.95399
150400	2.82272
150500	2.93045
150600	2.63818
150700	2.86402
150800	2.72072
150900	2.79561
151000	2.84068
151100	2.90767
151200	2.86337
151300	2.8746
151400	3.00696
151500	3.10637
151600	3.01116
151700	2.92709
151800	2.94592
151900	2.87255
152000	2.94873
152100	2.83173
152200	2.87549
152300	2.79485
152400	2.67966
152500	2.72602
152600	2.73615
152700	2.74577
152800	2.7741
152900	2.65193
153000	2.71981
153100	2.6526
153200	2.79295
153300	2.87821
153400	2.90919
153500	2.84545
153600	3.02283
153700	3.00431
153800	2.92912
153900	2.85667
154000	2.86265
154100	2.91387
154200	3.00807
154300	2.94458
154400	3.03273
154500	3.04422
154600	2.88898
154700	3.01675
154800	2.96278
154900	2.98572
155000	2.95065
155100	2.91363
155200	2.89111
155300	2.8066
155400	2.73617
155500	2.91304
155600	2.89264
155700	2.85668
155800	2.85513
155900	2.71778
156000	2.58175
156100	2.63277
156200	2.65395
156300	2.70899
156400	2.55944
156500	2.57037
156600	2.55373
156700	2.68205
156800	2.81226
156900	2.7879
157000	2.75172
157100	2.79953
157200	2.82717
157300	2.91712
157400	2.96771
157500	2.92974
157600	2.89053
157700	2.79045
157800	2.85378
157900	2.85895
158000	2.72
158100	2.66739
158200	2.65348
158300	2.62503
158400	2.81441
158500	2.78745
158600	2.84328
158700	2.89115
158800	2.85768
158900	2.97098
159000	2.82844
159100	2.82931
159200	2.81474
159300	2.82662
159400	2.78739
159500	2.70606
159600	2.64484
159700	2.5648
159800	2.59019
159900	2.74275
160000	2.77418
160100	2.6886
160200	2.75036
160300	2.72954
160400	2.61235
160500	2.56719
160600	2.70528
160700	2.66072
160800	2.80637
160900	2.6954
161000	2.74721
161100	2.71314
161200	2.54022
161300	2.7347
161400	2.69388
161500	2.52871
161600	2.58014
161700	2.61044
161800	2.41676
161900	2.36632
162000	2.4346
162100	2.39349
162200	2.29758
162300	2.39019
162400	2.33512
162500	2.4809
162600	2.61621
162700	2.74849
162800	2.75201
162900	2.72352
163000	2.79266
163100	2.83787
163200	2.80996
163300	2.73462
163400	2.82487
163500	2.88164
163600	2.80042
163700	2.69432
163800	2.67326
163900	2.69195
164000	2.80118
164100	2.83537
164200	2.85882
164300	2.93936
164400	2.75964
164500	2.7736
164600	2.68777
164700	2.66758
164800	2.61939
164900	2.60831
165000	2.65643
165100	2.58136
165200	2.52444
165300	2.57595
165400	2.71604
165500	2.58247
165600	2.62294
165700	2.7807
165800	2.72378
165900	2.6086
166000	2.68686
166100	2.72762
166200	2.7023
166300	2.77137
166400	2.75719
166500	2.80015
166600	2.75484
166700	2.76259
166800	2.79082
166900	2.82102
167000	2.91183
167100	2.95564
167200	2.67509
167300	2.80633
167400	2.70873
167500	2.69698
167600	2.65107
167700	2.70059
167800	2.68459
167900	2.65247
168000	2.78156
168100	2.68466
168200	2.57645
168300	2.71095
168400	2.73937
168500	2.64123
168600	2.55289
168700	2.54017
168800	2.71025
168900	2.67444
169000	2.87679
169100	2.76437
169200	2.68225
169300	2.62693
169400	2.47948
169500	2.54576
169600	2.64782
169700	2.54938
169800	2.47399
169900	2.45041
170000	2.24221
170100	2.37681
170200	2.38393
170300	2.21677
170400	2.42827
170500	2.22817
170600	2.40615
170700	2.40229
170800	2.37258
170900	2.40581
171000	2.34125
171100	2.46296
171200	2.34557
171300	2.38505
171400	2.42222
171500	2.43667
171600	2.54791
171700	2.45432
171800	2.46831
171900	2.50135
172000	2.47831
172100	2.41792
172200	2.52426
172300	2.39033
172400	2.42468
172500	2.50395
172600	2.45978
172700	2.52171
172800	2.59895
172900	2.58705
173000	2.48435
173100	2.64938
173200	2.60047
173300	2.48235
173400	2.6811
173500	2.7991
173600	2.77911
173700	2.73401
173800	2.63289
173900	2.65071
174000	2.67
174100	2.50255
174200	2.55169
174300	2.51049
174400	2.654
174500	2.64273
174600	2.69868
174700	2.64315
174800	2.75984
174900	2.8845
175000	2.89245
175100	2.80548
175200	2.76859
175300	2.7645
175400	2.82695
175500	2.76538
175600	2.86129
175700	2.7121
175800	2.59445
175900	2.65973
176000	2.615
176100	2.72161
176200	2.79306
176300	2.84421
176400	2.867
176500	2.68714
176600	2.7895
176700	2.90162
176800	2.85423
176900	2.93713
177000	2.90633
177100	3.04371
177200	3.10902
177300	3.04293
177400	2.97778
177500	3.03097
177600	2.96045
177700	3.02317
177800	2.89619
177900	2.90378
178000	2.81593
178100	2.72903
178200	2.8194
178300	2.77936
178400	2.74908
178500	2.6098
178600	2.86489
178700	2.65748
178800	2.64893
178900	2.73361
179000	2.66865
179100	2.78013
179200	2.90763
179300	2.93679
179400	2.74237
179500	2.81699
179600	2.70429
179700	2.86262
179800	2.8135
179900	2.76401
180000	2.53807
180100	2.70062
180200	2.66755
180300	2.73824
180400	2.68649
180500	2.79627
180600	2.7957
180700	2.83527
180800	2.72668
180900	2.74812
181000	2.82114
181100	2.77541
181200	2.73561
181300	2.70291
181400	2.76501
181500	2.81567
181600	2.83516
181700	2.87983
181800	2.85843
181900	2.88677
182000	3.14468
182100	2.96234
182200	3.01121
182300	2.98268
182400	2.90885
182500	2.79264
182600	2.84362
182700	2.84382
182800	2.81595
182900	2.81884
183000	3.08378
183100	3.00177
183200	3.00827
183300	2.89361
183400	3.11167
183500	2.99927
183600	2.88422
183700	2.87388
183800	2.7451
183900	2.79831
184000	2.85427
184100	2.84157
184200	2.73438
184300	2.93586
184400	2.89668
184500	2.98312
184600	2.86982
184700	2.85931
184800	2.87401
184900	2.81774
185000	2.83823
185100	2.77917
185200	2.86753
185300	2.84122
185400	2.83081
185500	2.94095
185600	2.81812
185700	2.87794
185800	2.92789
185900	2.91009
186000	2.94695
186100	2.99059
186200	3.02613
186300	2.9566
186400	3.06317
186500	2.95837
186600	2.85589
186700	2.83975
186800	2.85673
186900	2.93204
187000	2.94409
187100	2.92242
187200	2.88819
187300	2.87455
187400	2.89605
187500	2.90778
187600	2.88537
187700	2.90324
187800	2.88802
187900	2.89984
188000	2.85611
188100	2.89712
188200	2.84957
188300	2.79797
188400	2.84119
188500	2.93703
188600	2.85054
188700	2.90855
188800	2.82868
188900	2.9324
189000	2.96615
189100	3.03446
189200	2.87386
189300	2.98898
189400	2.86041
189500	2.91926
189600	2.90543
189700	2.92723
189800	2.86102
189900	2.81481
190000	2.90518
190100	2.88059
190200	2.87038
190300	2.88459
190400	2.86827
190500	2.96454
190600	2.87464
190700	2.94057
190800	2.94938
190900	2.87643
191000	2.83473
191100	2.86197
191200	2.92551
191300	2.93948
191400	3.07524
191500	2.9581
191600	2.96493
191700	2.87459
191800	2.87248
191900	2.84471
192000	2.87449
192100	2.87556
192200	2.9003
192300	2.85016
192400	2.90718
192500	2.96634
192600	3.04834
192700	2.8362
192800	2.83059
192900	2.95961
193000	2.86742
193100	2.88266
193200	2.86308
193300	2.88469
193400	2.91561
193500	2.88913
193600	2.89889
193700	2.93785
193800	2.92792
193900	2.9868
194000	2.86611
194100	2.88072
194200	2.98398
194300	2.8938
194400	2.93432
194500	2.92239
194600	2.95823
194700	2.98341
194800	3.07636
194900	2.96667
195000	2.92476
195100	2.97611
195200	3.04287
195300	3.00632
195400	2.84022
195500	2.86677
195600	2.8753
195700	2.96904
195800	2.89199
195900	3.00012
196000	2.96472
196100	3.05928
196200	3.00068
196300	2.98958
196400	2.94284
196500	3.02471
196600	2.97821
196700	3.04501
196800	2.94998
196900	2.96236
197000	2.92304
197100	3.00054
197200	2.92059
197300	2.90441
197400	2.93427
197500	2.97979
197600	2.94714
197700	2.97015
197800	2.9653
197900	2.9178
198000	2.92048
198100	2.94393
198200	2.90836
198300	2.93958
198400	2.89401
198500	2.92561
198600	3.02889
198700	2.96525
198800	3.01935
198900	2.98822
199000	3.04869
199100	3.02773
199200	2.91011
199300	2.96063
199400	3.02483
199500	3.00401
199600	2.89762
199700	2.92185
199800	2.97544
[truncated: 17,103 more rows]
