# Supplementary material for: Discovery of a heparan sulfate binding domain in monkeypox virus H3 as an anti-poxviral drug target combining AI and MD simulations
Source: eLife. 2025 Jan 16;13:RP100545. doi: 10.7554/eLife.100545 (PMC11737874; doi:10.7554/eLife.100545)
Supplement: Figure 3—source data 1. [file elife-100545-fig3-data1.xlsx]

## Sheet: Sheet1
Residue index	Charge
0	-0.00451178
1	-0.00478861
2	-0.00533753
3	-0.00615033
4	-0.00721225
5	-0.00846698
6	-0.00990611
7	-0.0114446
8	-0.0130106
9	-0.0145332
10	-0.0158986
11	-0.0170278
12	-0.0178438
13	-0.0182989
14	-0.0183709
15	-0.0180653
16	-0.0174257
17	-0.0165134
18	-0.0154079
19	-0.014212
20	-0.013025
21	-0.011964
22	-0.0111555
23	-0.0107335
24	-0.0108345
25	-0.0115856
26	-0.0130825
27	-0.0153651
28	-0.0184035
29	-0.0220787
30	-0.0261849
31	-0.0304339
32	-0.0345088
33	-0.0380839
34	-0.0408892
35	-0.0427227
36	-0.043497
37	-0.0432519
38	-0.0421603
39	-0.0404446
40	-0.0384011
41	-0.0363384
42	-0.034549
43	-0.033266
44	-0.0326516
45	-0.0328081
46	-0.0337554
47	-0.0354528
48	-0.0378097
49	-0.0406976
50	-0.0439666
51	-0.0474584
52	-0.0510152
53	-0.0544905
54	-0.0577742
55	-0.0607252
56	-0.0632815
57	-0.0653752
58	-0.0669495
59	-0.0679814
60	-0.0684258
61	-0.0682482
62	-0.0674137
63	-0.0658973
64	-0.0636761
65	-0.0607453
66	-0.0571345
67	-0.0529026
68	-0.0481481
69	-0.0430082
70	-0.0376424
71	-0.0322295
72	-0.0269487
73	-0.0219658
74	-0.0174192
75	-0.013413
76	-0.010012
77	-0.00723559
78	-0.00506946
79	-0.00346713
80	-0.00236398
81	-0.0016703
82	-0.0012919
83	-0.00113188
84	-0.00111264
85	-0.00115366
86	-0.00119109
87	-0.00116296
88	-0.00106606
89	-0.000889386
90	-0.000636681
91	-0.000332295
92	-1.01957e-05
93	0.000298495
94	0.000559518
95	0.0007461
96	0.000835682
97	0.000834969
98	0.000741025
99	0.000557982
100	0.000310834
101	2.00109e-05
102	-0.000292631
103	-0.000604427
104	-0.000893603
105	-0.00116049
106	-0.00139678
107	-0.00159771
108	-0.00177081
109	-0.00192574
110	-0.00207225
111	-0.00221736
112	-0.0023677
113	-0.0025277
114	-0.00270168
115	-0.00289847
116	-0.00313649
117	-0.00344349
118	-0.00386211
119	-0.0044454
120	-0.00524698
121	-0.00631442
122	-0.00767492
123	-0.00932282
124	-0.0112121
125	-0.0132495
126	-0.0153075
127	-0.0172297
128	-0.0188437
129	-0.0200029
130	-0.0205732
131	-0.0204976
132	-0.0197447
133	-0.0183532
134	-0.0164278
135	-0.0140975
136	-0.0115156
137	-0.00883942
138	-0.00622168
139	-0.00379728
140	-0.00168164
141	4.5316e-05
142	0.00132998
143	0.00214098
144	0.00246133
145	0.00231338
146	0.00172653
147	0.000764347
148	-0.000488249
149	-0.00193199
150	-0.00346146
151	-0.00498152
152	-0.00640375
153	-0.00768603
154	-0.00881782
155	-0.00987035
156	-0.0109712
157	-0.0122794
158	-0.0140037
159	-0.0163491
160	-0.0195162
161	-0.0236278
162	-0.0287228
163	-0.034734
164	-0.041483
165	-0.0486887
166	-0.0559628
167	-0.0628842
168	-0.0690665
169	-0.0741495
170	-0.077877
171	-0.0801139
172	-0.0808571
173	-0.0802455
174	-0.0785342
175	-0.0760323
176	-0.073081
177	-0.0700056
178	-0.067058
179	-0.064395
180	-0.0620227
181	-0.059854
182	-0.0576493
183	-0.0550612
184	-0.0517209
185	-0.0472563
186	-0.0413791
187	-0.0339592
188	-0.0250581
189	-0.0149735
190	-0.00422746
191	0.00648013
192	0.0163517
193	0.0245875
194	0.030463
195	0.033437
196	0.0332236
197	0.0298029
198	0.0234232
199	0.0145855
200	0.0039618
201	-0.00768014
202	-0.0195483
203	-0.0308916
204	-0.0410668
205	-0.0495617
206	-0.0560504
207	-0.0603629
208	-0.0625042
209	-0.0626032
210	-0.0609415
211	-0.0578408
212	-0.0536888
213	-0.0488588
214	-0.0437431
215	-0.038716
216	-0.0341048
217	-0.0301983
218	-0.0272971
219	-0.025689
220	-0.0256656
221	-0.0275192
222	-0.0315097
223	-0.0378776
224	-0.0467951
225	-0.0583214
226	-0.072361
227	-0.0886413
228	-0.106701
229	-0.125872
230	-0.145319
231	-0.164082
232	-0.181147
233	-0.195549
234	-0.206408
235	-0.213072
236	-0.215132
237	-0.212497
238	-0.205327
239	-0.194093
240	-0.179469
241	-0.162283
242	-0.143421
243	-0.123806
244	-0.104233
245	-0.0854173
246	-0.0679082
247	-0.0521099
248	-0.0382693
249	-0.0265042
250	-0.0168493
251	-0.00925556
252	-0.00363804
253	9.76206e-05
254	0.00208631
255	0.00250891
256	0.0015766
257	-0.000434205
258	-0.00318744
259	-0.00626903
260	-0.00926132
261	-0.0117311
262	-0.0132815
263	-0.0135868
264	-0.0124368
265	-0.00977456
266	-0.00568866
267	-0.000436396
268	0.00559926
269	0.011914
270	0.0179452
271	0.0231033
272	0.0268336
273	0.0286978
274	0.0283677
275	0.025697
276	0.020728
277	0.0136934
278	0.00497348
279	-0.00492818
280	-0.0154658
281	-0.0260817
282	-0.0362886
283	-0.0457285
284	-0.0541201
285	-0.0613511
286	-0.0674167
287	-0.0724299
288	-0.0765251
289	-0.0798353
290	-0.0824616
291	-0.0844261
292	-0.0856105
293	-0.0858802
294	-0.0849726
295	-0.0826489
296	-0.0786601
297	-0.0728852
298	-0.0653208
299	-0.0561226
300	-0.0456233
301	-0.0343013
302	-0.0227181
303	-0.0115066
304	-0.00126487
305	0.00752155
306	0.014493
307	0.0194771
308	0.0224635
309	0.0236713
310	0.0234296
311	0.022156
312	0.0202646
313	0.0181138
314	0.0160056
315	0.0140229
316	0.0121349
317	0.0101439
318	0.00774591
319	0.00459329
320	0.000389207
321	-0.00510976
322	-0.0119961
323	-0.0201568
324	-0.0293307
325	-0.0390843
326	-0.0488845
327	-0.05815
328	-0.0662851
329	-0.0727865
330	-0.0772491
331	-0.0793841
332	-0.0790759
333	-0.0764034
334	-0.071525
335	-0.0647714
336	-0.0566064
337	-0.0475544
338	-0.0382341
339	-0.0292762
340	-0.0212745
341	-0.0147622
342	-0.0101398
343	-0.00761169
344	-0.00715448
345	-0.00854279
346	-0.0113272
347	-0.0149005
348	-0.0186051
349	-0.0217407
350	-0.0236854
351	-0.0239352
352	-0.0221619
353	-0.0181825
354	-0.0120362
355	-0.00386477
356	0.00606836
357	0.0174127
358	0.0297332
359	0.0426092
360	0.0555978
361	0.068305
362	0.0803365
363	0.0913628
364	0.101179
365	0.109627
366	0.116651
367	0.122276
368	0.126566
369	0.129607
370	0.131538
371	0.132445
372	0.132411
373	0.131503
374	0.129759
375	0.127217
376	0.123923
377	0.119902
378	0.11521
379	0.109881
380	0.103937
381	0.0973743
382	0.0902517
383	0.0825356
384	0.0742638
385	0.0655043
386	0.0563245
387	0.0468528
388	0.0372373
389	0.0276232
390	0.0181674
391	0.00899891
392	0.000168199
393	-0.00831492
394	-0.0165003
395	-0.0244627
396	-0.0323067
397	-0.0400817
398	-0.0478339
399	-0.0555207
400	-0.0630347
401	-0.0701561
402	-0.0766416
403	-0.08219
404	-0.0865147
405	-0.0894196
406	-0.0907433
407	-0.0904548
408	-0.0886369
409	-0.0854845
410	-0.0812607
411	-0.0762645
412	-0.0708136
413	-0.0651624
414	-0.0594969
415	-0.0538984
416	-0.0483534
417	-0.042771
418	-0.0370074
419	-0.0309258
420	-0.0244264
421	-0.017497
422	-0.0102437
423	-0.00289292
424	0.00421291
425	0.0106531
426	0.0159838
427	0.0197989
428	0.0217827
429	0.0217712
430	0.0197672
431	0.0159056
432	0.0105142
433	0.00399593
434	-0.0031927
435	-0.0105998
436	-0.0178271
437	-0.0245309
438	-0.0305098
439	-0.0356089
440	-0.0397832
441	-0.0430425
442	-0.0454132
443	-0.0469534
444	-0.0477103
