# Supplementary material for: Discovery of a heparan sulfate binding domain in monkeypox virus H3 as an anti-poxviral drug target combining AI and MD simulations
Source: eLife. 2025 Jan 16;13:RP100545. doi: 10.7554/eLife.100545 (PMC11737874; doi:10.7554/eLife.100545)
Supplement: Figure 3—source data 2. [file elife-100545-fig3-data2.xlsx]

## Sheet: Sheet1
0	1	2	3	4	5	6	7	8	9	10	11	12	13	14	15	16	17	18	19	20	21	22	23	24	25	26	27	28	29	30	31	32	33	34	35	36	37	38	39	40	41	42	43	44	45	46	47	48	49
-0.000250399	-0.000167474	2.3207e-05	0.000372741	0.000932195	0.00183921	0.00313703	0.00495784	0.00734851	0.0103166	0.013844	0.0178018	0.0219764	0.0260735	0.0297321	0.0325676	0.0341803	0.0342423	0.0325161	0.0288904	0.023396	0.0162033	0.00760496	-0.0020133	-0.012206	-0.0225003	-0.0324436	-0.0415495	-0.0494293	-0.0557186	-0.0601512	-0.0625103	-0.062715	-0.0608639	-0.0571934	-0.0520825	-0.0460405	-0.0396801	-0.0337143	-0.0287525	-0.0253866	-0.0240201	-0.024926	-0.0281941	-0.0337077	-0.0412621	-0.0505273	-0.0611259	-0.0726715	-0.084804
-0.000303	-0.000230964	-6.29889e-05	0.000250278	0.000757581	0.00159402	0.00280055	0.00450822	0.00676311	0.00957526	0.012931	0.0167081	0.0207022	0.0246297	0.028141	0.0308621	0.0324023	0.0324398	0.0307389	0.0271866	0.0218079	0.0147647	0.00633909	-0.00309417	-0.0130999	-0.0232138	-0.0329896	-0.0419448	-0.0496925	-0.055868	-0.0602039	-0.0624813	-0.0626175	-0.0607095	-0.0569926	-0.0518454	-0.0457768	-0.0393997	-0.0334268	-0.0284673	-0.0251121	-0.0237636	-0.0246927	-0.0279876	-0.0335298	-0.0411124	-0.0504037	-0.0610245	-0.0725873	-0.0847303
-0.000250399	-0.000167474	2.3207e-05	0.000372741	0.000932195	0.00183921	0.00313703	0.00495784	0.00734851	0.0103166	0.013844	0.0178018	0.0219764	0.0260735	0.0297321	0.0325676	0.0341803	0.0342423	0.0325161	0.0288904	0.023396	0.0162033	0.00760496	-0.0020133	-0.012206	-0.0225003	-0.0324436	-0.0415495	-0.0494293	-0.0557186	-0.0601512	-0.0625103	-0.062715	-0.0608639	-0.0571934	-0.0520825	-0.0460405	-0.0396801	-0.0337143	-0.0287525	-0.0253866	-0.0240201	-0.024926	-0.0281935	-0.0337065	-0.04126	-0.0505235	-0.0611191	-0.0726599	-0.0847846
-0.000213365	-0.000116388	0.000105019	0.00050722	0.00114929	0.00217782	0.00362884	0.00566878	0.00833815	0.0116422	0.0155484	0.0198977	0.0244251	0.0287604	0.0324389	0.0349511	0.0357502	0.0343532	0.0303734	0.0235764	0.013917	0.00155969	-0.013121	-0.0295584	-0.0470272	-0.0646889	-0.0816673	-0.0970332	-0.109982	-0.119829	-0.126058	-0.128401	-0.126826	-0.121662	-0.113463	-0.103057	-0.0914025	-0.0796207	-0.0688132	-0.0600277	-0.0541683	-0.0519221	-0.0537673	-0.0599077	-0.0703085	-0.0847179	-0.102681	-0.123599	-0.146773	-0.171458
-0.00027207	-0.00019445	-1.49813e-05	0.000316279	0.000848804	0.00171838	0.00296639	0.0047238	0.00703581	0.00991112	0.0133333	0.0171768	0.0212333	0.0252151	0.0287683	0.0315161	0.0330653	0.0330933	0.0313653	0.0277701	0.0223358	0.0152282	0.0067331	-0.0027711	-0.0128463	-0.0230263	-0.0328636	-0.0418755	-0.0496754	-0.0558992	-0.0602801	-0.0625997	-0.0627753	-0.0609035	-0.0572186	-0.0520981	-0.0460499	-0.0396856	-0.0337174	-0.0287543	-0.0253876	-0.0240207	-0.024926	-0.0281935	-0.0337065	-0.04126	-0.0505235	-0.0611191	-0.0726599	-0.0847846
-0.00021848	-0.000129646	7.32487e-05	0.00044198	0.00105018	0.00201319	0.00339282	0.00533275	0.00789682	0.0111177	0.0150125	0.0195007	0.0244327	0.0295944	0.0347193	0.0395272	0.0437223	0.0470668	0.0493802	0.0505565	0.0505603	0.0494115	0.0471636	0.0438831	0.0396383	0.0345023	0.0285487	0.021951	0.0148921	0.00766482	0.000607919	-0.00585449	-0.0113273	-0.0155276	-0.0182892	-0.0196109	-0.0196793	-0.0188653	-0.0177287	-0.0168119	-0.0167116	-0.0178904	-0.0207119	-0.0253749	-0.0318709	-0.0400935	-0.0497961	-0.0606666	-0.0723677	-0.084572
-0.000219469	-0.00013096	7.12147e-05	0.000438742	0.00102342	0.00196357	0.00330286	0.00517342	0.00762121	0.0106524	0.0142463	0.0182705	0.0225075	0.0266589	0.0303596	0.0332218	0.0348436	0.0348965	0.0331436	0.0294758	0.0239271	0.016672	0.00800729	-0.00167743	-0.0119333	-0.022285	-0.0322782	-0.0414259	-0.0493395	-0.0556552	-0.0601076	-0.0624812	-0.0626961	-0.060852	-0.057186	-0.0520781	-0.0460379	-0.0396786	-0.0337135	-0.0287521	-0.0253864	-0.0240201	-0.024926	-0.0281935	-0.0337065	-0.04126	-0.0505235	-0.0611191	-0.0726599	-0.0847846
-0.000250399	-0.000167474	2.3207e-05	0.000372741	0.000932195	0.00183921	0.00314734	0.00497765	0.0073855	0.0103838	0.0139628	0.018006	0.0223178	0.0266287	0.03061	0.0339179	0.0362002	0.0371813	0.0366752	0.0346149	0.0310591	0.0261805	0.0202393	0.0135474	0.00643384	-0.000783636	-0.00783536	-0.0144286	-0.0203581	-0.0254105	-0.0294192	-0.0322022	-0.0336438	-0.0337431	-0.0325851	-0.0303658	-0.0274006	-0.0241194	-0.02108	-0.0187753	-0.0177235	-0.0182957	-0.0207669	-0.0252545	-0.0316866	-0.0399097	-0.0496456	-0.060564	-0.0723185	-0.0845803
-0.000235823	-0.000150119	4.63303e-05	0.000404972	0.000977532	0.00190217	0.0032444	0.00511341	0.0075741	0.0106451	0.0143252	0.0185105	0.0230235	0.0276198	0.0320046	0.0358761	0.0389327	0.0409541	0.0418101	0.0414819	0.0400591	0.0377178	0.0346834	0.0311887	0.0274361	0.0235741	0.0196726	0.0158121	0.0119966	0.00825215	0.00465884	0.00136522	-0.00151001	-0.00385498	-0.0055812	-0.00670318	-0.00735261	-0.00780023	-0.00838893	-0.0095038	-0.011562	-0.0148476	-0.0195496	-0.0256661	-0.0330255	-0.0413139	-0.0500955	-0.0589033	-0.0673137	-0.0750208
-0.000267562	-0.000186542	4.08402e-07	0.000344563	0.000897295	0.00179672	0.00308671	0.00490029	0.0072869	0.0102535	0.013784	0.017751	0.0219427	0.0260668	0.0297646	0.0326547	0.0343415	0.034503	0.0329082	0.0294539	0.024179	0.0172615	0.00899913	-0.000221489	-0.00995968	-0.0197544	-0.0291722	-0.037753	-0.0451394	-0.0509998	-0.0550999	-0.0572489	-0.0573834	-0.0556082	-0.0521536	-0.0473817	-0.0417757	-0.0359168	-0.0304844	-0.0260563	-0.0231974	-0.0222915	-0.0235983	-0.0272017	-0.0329859	-0.0407507	-0.0501735	-0.0608852	-0.0725078	-0.0846884
-0.00692542	-0.00772632	-0.00931097	-0.0116352	-0.0146383	-0.0181375	-0.0219669	-0.0258465	-0.0294636	-0.0324809	-0.0345198	-0.0353218	-0.0346801	-0.0325388	-0.0289955	-0.0242826	-0.0187709	-0.0128782	-0.00703486	-0.00162369	0.00306069	0.00683126	0.00960554	0.0113849	0.0122256	0.0122116	0.0114171	0.00997838	0.00798714	0.005572	0.00291634	0.000263377	-0.00218766	-0.00426033	-0.00581702	-0.00683662	-0.00742605	-0.00783954	-0.00840939	-0.0095038	-0.011562	-0.0148476	-0.0195496	-0.0256661	-0.0330255	-0.0413139	-0.0500955	-0.0589033	-0.0673137	-0.0750208
-0.00027207	-0.00019445	-1.49813e-05	0.000316279	0.000870302	0.00175967	0.00304353	0.00486398	0.00728355	0.010337	0.0140452	0.0183344	0.0230639	0.0280307	0.0329805	0.0376448	0.0417381	0.0450303	0.0473448	0.0485752	0.0486816	0.0476762	0.0456021	0.0425138	0.0384682	0.0335277	0.0277573	0.0213247	0.0144087	0.00730099	0.000340874	-0.00604567	-0.0114608	-0.0156186	-0.0183496	-0.0196501	-0.0197041	-0.0188806	-0.0177379	-0.0168173	-0.0167147	-0.0178921	-0.0207139	-0.0253779	-0.0318759	-0.0401024	-0.0498115	-0.0606933	-0.0724122	-0.0846444
-0.000250399	-0.000167474	2.3207e-05	0.000372741	0.000932195	0.00183921	0.00313703	0.00495784	0.00734851	0.0103166	0.013844	0.0178018	0.0219764	0.0260735	0.0297321	0.0325676	0.0341803	0.0342423	0.0325161	0.0288904	0.023396	0.0162033	0.00760496	-0.0020133	-0.012206	-0.0225003	-0.0324436	-0.0415495	-0.0494293	-0.0557186	-0.0601512	-0.0625103	-0.062715	-0.0608639	-0.0571934	-0.0520825	-0.0460405	-0.0396801	-0.0337143	-0.0287525	-0.0253866	-0.0240201	-0.024926	-0.0281935	-0.0337065	-0.04126	-0.0505235	-0.0611191	-0.0726599	-0.0847846
-0.000219469	-0.00013096	7.12147e-05	0.000438742	0.00102342	0.00196357	0.00330286	0.00517342	0.00762121	0.0106524	0.0142463	0.0182705	0.0225075	0.0266589	0.0303596	0.0332218	0.0348436	0.0348965	0.0331436	0.0294758	0.0239271	0.016672	0.00800729	-0.00167743	-0.0119333	-0.022285	-0.0322782	-0.0414259	-0.0493395	-0.0556552	-0.0601076	-0.0624812	-0.0626961	-0.060852	-0.057186	-0.0520781	-0.0460379	-0.0396786	-0.0337135	-0.0287521	-0.0253864	-0.0240201	-0.024926	-0.0281935	-0.0337065	-0.04126	-0.0505235	-0.0611191	-0.0726599	-0.0847846
-0.000250399	-0.000167474	2.3207e-05	0.000372741	0.000932195	0.00183921	0.00313703	0.00495784	0.00734851	0.0103166	0.013844	0.0178018	0.0219764	0.0260735	0.0297321	0.0325676	0.0341803	0.0342423	0.0325161	0.0288904	0.023396	0.0162033	0.00760496	-0.0020133	-0.012206	-0.0225003	-0.0324436	-0.0415495	-0.0494293	-0.0557186	-0.0601512	-0.0625103	-0.062715	-0.0608639	-0.0571934	-0.0520825	-0.0460405	-0.0396801	-0.0337143	-0.0287525	-0.0253866	-0.0240201	-0.024926	-0.0281935	-0.0337065	-0.04126	-0.0505235	-0.0611191	-0.0726599	-0.0847846
-0.00021848	-0.000129646	7.32487e-05	0.00044198	0.00102868	0.0019719	0.00331567	0.00519257	0.00765086	0.0106953	0.014307	0.0183548	0.0226227	0.0268141	0.0305663	0.0334947	0.0352016	0.0353638	0.0337507	0.0302607	0.0249351	0.0179553	0.00962237	0.000326862	-0.00948718	-0.0193556	-0.0288428	-0.0374968	-0.0449482	-0.0508734	-0.0550434	-0.0572761	-0.0575214	-0.0559028	-0.0526764	-0.0482379	-0.043113	-0.0379523	-0.0334649	-0.0303	-0.0290806	-0.0302369	-0.0340599	-0.0406468	-0.0498635	-0.0614914	-0.0751039	-0.0903016	-0.106628	-0.123674
-0.000174222	0.000180549	0.0009681	0.0023413	0.00449398	0.00773043	0.0122683	0.0183734	0.0262101	0.03577	0.0469295	0.0592704	0.072215	0.0849803	0.0966617	0.10633	0.113143	0.116462	0.115935	0.111558	0.103671	0.0929139	0.0801414	0.0663075	0.0523486	0.0390804	0.0271213	0.0168442	0.00841017	0.00179197	-0.00321427	-0.00687102	-0.00950593	-0.0114546	-0.0130013	-0.0144136	-0.015928	-0.0177639	-0.0201355	-0.0231988	-0.0271009	-0.0318575	-0.0374481	-0.0436727	-0.0502043	-0.056624	-0.06242	-0.0670858	-0.0702107	-0.0715733
-0.00499514	-0.00539102	-0.00612961	-0.00709943	-0.0081488	-0.00899526	-0.00939893	-0.00900562	-0.00748008	-0.00456016	-5.78547e-05	0.00602685	0.0135349	0.0220804	0.0310856	0.0398366	0.0475672	0.0535618	0.0572553	0.0583147	0.0566835	0.0525837	0.0464736	0.0389713	0.0307614	0.0225002	0.0147356	0.00784533	0.00205112	-0.00257854	-0.00613577	-0.00877043	-0.010707	-0.0121932	-0.0134432	-0.0146707	-0.0160735	-0.0178439	-0.0201783	-0.0232211	-0.0271009	-0.0318575	-0.0374481	-0.0436727	-0.0502043	-0.056624	-0.06242	-0.0670858	-0.0702107	-0.0715733
-0.00715007	-0.00799672	-0.00967579	-0.0121505	-0.0153695	-0.0191599	-0.0233871	-0.0277525	-0.0319628	-0.0356857	-0.0385414	-0.0402732	-0.0406771	-0.0397089	-0.037491	-0.0343102	-0.030591	-0.0268436	-0.0235996	-0.0213436	-0.0204543	-0.0211643	-0.0235419	-0.0274961	-0.0327994	-0.0391204	-0.0460379	-0.0531196	-0.0599525	-0.0660603	-0.0710257	-0.0744918	-0.0761717	-0.0758257	-0.0733102	-0.068569	-0.061627	-0.0525517	-0.0415221	-0.0286684	-0.0141659	0.00181841	0.0190922	0.0374077	0.0564872	0.0758946	0.095094	0.113414	0.130071	0.144209
0.0222074	0.0229155	0.0241049	0.0253434	0.0260318	0.0254913	0.0229785	0.0178826	0.00972533	-0.00160107	-0.0158786	-0.0325193	-0.0505566	-0.0687474	-0.0857797	-0.100335	-0.111386	-0.118202	-0.120531	-0.118647	-0.113233	-0.105341	-0.0962387	-0.0872473	-0.079585	-0.0742254	-0.0717716	-0.0724663	-0.0760897	-0.0820544	-0.0894734	-0.0972723	-0.10434	-0.109594	-0.112175	-0.111496	-0.107252	-0.0995251	-0.0886598	-0.0752662	-0.0601157	-0.0441653	-0.0283249	-0.013561	-0.000731216	0.00939935	0.0162102	0.0192566	0.0182998	0.0133283
-0.00531331	-0.00613524	-0.00780761	-0.010377	-0.0138931	-0.0183849	-0.0238594	-0.0302103	-0.0372872	-0.044831	-0.0525393	-0.0600147	-0.0668615	-0.0727187	-0.0773089	-0.0804812	-0.0822383	-0.0827429	-0.0822974	-0.0813222	-0.0802325	-0.0794543	-0.0793141	-0.0800025	-0.0815481	-0.0838195	-0.0865539	-0.0894059	-0.0920311	-0.0941082	-0.0954082	-0.0958893	-0.0956036	-0.0947787	-0.0937533	-0.0928799	-0.0925481	-0.093107	-0.0948394	-0.0979613	-0.10262	-0.108972	-0.117064	-0.126968	-0.138722	-0.152296	-0.167556	-0.184222	-0.201834	-0.219747
0.022093	0.0227984	0.0239841	0.0252211	0.025915	0.0253921	0.0229366	0.0179192	0.00988324	-0.0012674	-0.0152981	-0.0316009	-0.0491814	-0.0667528	-0.0829501	-0.0963799	-0.105923	-0.110744	-0.110482	-0.105314	-0.0958492	-0.0831211	-0.0684456	-0.053279	-0.0390637	-0.0270815	-0.018306	-0.0133789	-0.0124655	-0.0153049	-0.0212379	-0.029291	-0.0383151	-0.047062	-0.0543968	-0.0593879	-0.0613555	-0.0600165	-0.055396	-0.0478495	-0.0379683	-0.0266027	-0.0146235	-0.00300881	0.0073356	0.0155741	0.0210048	0.0230987	0.0215355	0.0162272
-0.00150721	-0.00184768	-0.00256603	-0.00373238	-0.00544519	-0.00779776	-0.0109441	-0.0149757	-0.0199466	-0.0258778	-0.0326593	-0.0401218	-0.0479841	-0.0559001	-0.0634235	-0.0701351	-0.0756542	-0.0796853	-0.0821393	-0.0830756	-0.0827663	-0.0816601	-0.0803297	-0.0793949	-0.0794317	-0.0808785	-0.083957	-0.0886389	-0.0945639	-0.101149	-0.107609	-0.11304	-0.116592	-0.117571	-0.115526	-0.1103	-0.10212	-0.0915118	-0.0793226	-0.0664564	-0.0538571	-0.0423855	-0.0326391	-0.0249305	-0.0192498	-0.0152884	-0.0125356	-0.010376	-0.00820831	-0.00555643
0.0131923	0.013224	0.0131378	0.0126529	0.0113895	0.00894144	0.00487788	-0.00114545	-0.00926192	-0.0194608	-0.0314288	-0.0446414	-0.0583002	-0.0714589	-0.0831018	-0.092197	-0.0978861	-0.0995285	-0.0967162	-0.0894144	-0.0778516	-0.0625875	-0.0444225	-0.0243519	-0.00350397	0.0169257	0.0357391	0.0517823	0.0640986	0.0718614	0.0744998	0.0717724	0.0637397	0.0508487	0.0338118	0.0136519	-0.00835262	-0.0308536	-0.0525249	-0.0720643	-0.0884189	-0.100802	-0.10886	-0.112605	-0.112511	-0.109383	-0.104331	-0.0986392	-0.0936165	-0.09045
0.014752	0.0150785	0.0156089	0.0161143	0.0162868	0.0158051	0.0143135	0.0115677	0.00745776	0.00198519	-0.00460661	-0.0119486	-0.0194751	-0.026547	-0.0325082	-0.036705	-0.0386353	-0.0379506	-0.034433	-0.0281111	-0.0191381	-0.00787294	0.00518658	0.0194103	0.0340546	0.0482854	0.0612082	0.071919	0.0795767	0.083407	0.0828379	0.0775849	0.0676075	0.05325	0.0351225	0.0141957	-0.00838376	-0.0313146	-0.0533341	-0.0732059	-0.0899542	-0.102869	-0.111683	-0.116484	-0.117749	-0.116259	-0.112988	-0.108967	-0.105143	-0.102253
0.0131923	0.013224	0.0131378	0.0126529	0.0113895	0.00894144	0.00487788	-0.00114545	-0.00926192	-0.0194608	-0.0314288	-0.0446414	-0.0583002	-0.0714589	-0.0831018	-0.092197	-0.0978861	-0.0995285	-0.0967162	-0.0894144	-0.0778516	-0.0625875	-0.0444225	-0.0243519	-0.00350397	0.0169257	0.0357391	0.0517823	0.0640986	0.0718614	0.0744998	0.0717724	0.0637397	0.0508487	0.0338118	0.0136519	-0.00835262	-0.0308536	-0.0525249	-0.0720643	-0.0884189	-0.100802	-0.10886	-0.112605	-0.112511	-0.109383	-0.104331	-0.0986392	-0.0936165	-0.09045
-0.0308314	-0.0324418	-0.035541	-0.039895	-0.0452019	-0.0510331	-0.0570268	-0.0627796	-0.0680151	-0.0724744	-0.0760285	-0.0786352	-0.0803843	-0.0814274	-0.0819029	-0.0820397	-0.082018	-0.0820361	-0.0822913	-0.0830228	-0.084473	-0.086909	-0.0905959	-0.0957611	-0.102549	-0.110969	-0.120859	-0.131869	-0.143409	-0.154745	-0.165023	-0.173361	-0.178943	-0.181128	-0.17954	-0.174113	-0.165173	-0.153313	-0.139464	-0.124725	-0.110176	-0.0969181	-0.0858138	-0.0775081	-0.0722192	-0.0698776	-0.0700896	-0.072222	-0.0755017	-0.0791307
0.00637664	0.00697784	0.00813418	0.00975017	0.0116727	0.0137035	0.0155457	0.0168582	0.0173059	0.0165348	0.0143006	0.0104387	0.00499994	-0.00183961	-0.009648	-0.0178675	-0.0258427	-0.0329135	-0.0385128	-0.042279	-0.0440609	-0.0440337	-0.0426442	-0.0405716	-0.0386425	-0.037722	-0.0385989	-0.0418739	-0.0478802	-0.0566333	-0.0678084	-0.0808643	-0.0949621	-0.109196	-0.122654	-0.134468	-0.143964	-0.150652	-0.154349	-0.155	-0.152776	-0.148081	-0.141377	-0.133223	-0.124258	-0.115088	-0.106314	-0.098477	-0.0920201	-0.0872575
-0.0091466	-0.0107841	-0.0141442	-0.0193727	-0.0266341	-0.0360295	-0.0476034	-0.0611918	-0.076414	-0.0926948	-0.109183	-0.124916	-0.138799	-0.149841	-0.157117	-0.159967	-0.158112	-0.15159	-0.140811	-0.126483	-0.109588	-0.0912692	-0.0727537	-0.0552788	-0.0400293	-0.0280851	-0.0203537	-0.0175727	-0.0202462	-0.028538	-0.0423358	-0.061116	-0.083978	-0.109647	-0.136537	-0.162783	-0.186384	-0.205396	-0.218094	-0.223031	-0.219289	-0.206593	-0.185356	-0.156649	-0.122192	-0.0842083	-0.045248	-0.00797494	0.025069	0.0516903
0.00637664	0.00697784	0.00813418	0.00975017	0.0116727	0.0137035	0.0155457	0.0168582	0.0173059	0.0165348	0.0143006	0.0104387	0.00499994	-0.00183961	-0.009648	-0.0178675	-0.0258427	-0.0329135	-0.0385128	-0.042279	-0.0440609	-0.0440337	-0.0426442	-0.0405716	-0.0386425	-0.037722	-0.0385989	-0.0418739	-0.0478802	-0.0566333	-0.0678084	-0.0808643	-0.0949621	-0.109196	-0.122654	-0.134468	-0.143964	-0.150652	-0.154349	-0.155	-0.152776	-0.148081	-0.141377	-0.133223	-0.124258	-0.115088	-0.106314	-0.098477	-0.0920201	-0.0872575
-0.0352951	-0.0376977	-0.0424033	-0.0492105	-0.057819	-0.0678089	-0.0787	-0.089946	-0.100942	-0.11102	-0.11959	-0.126108	-0.130055	-0.131113	-0.129032	-0.123792	-0.115476	-0.104344	-0.0907878	-0.0753565	-0.0586872	-0.04152	-0.0246621	-0.00895692	0.00475912	0.0157124	0.0232565	0.0269321	0.0265833	0.0223363	0.0146492	0.00427924	-0.00779159	-0.0204603	-0.0326419	-0.0433867	-0.0520476	-0.058246	-0.0620479	-0.0637747	-0.0640448	-0.0636192	-0.0632341	-0.0635525	-0.0649831	-0.0677082	-0.0716261	-0.0763987	-0.0815236	-0.086431
-0.00690705	-0.00754296	-0.00880448	-0.0107371	-0.0133537	-0.0166564	-0.0206773	-0.0254249	-0.0308226	-0.0368214	-0.0431599	-0.0495815	-0.0556865	-0.061002	-0.0649369	-0.0669218	-0.0664317	-0.0630844	-0.0567206	-0.0474754	-0.0358146	-0.0225311	-0.00869401	0.00444876	0.0156028	0.0235786	0.0274371	0.026622	0.0210279	0.0110578	-0.00249434	-0.0184443	-0.0354266	-0.0519794	-0.0668043	-0.0787895	-0.0872048	-0.0916761	-0.0922859	-0.0893687	-0.0835867	-0.0757137	-0.0666849	-0.0573574	-0.0485792	-0.0410421	-0.0353191	-0.0318302	-0.0308291	-0.0323948
-0.00150721	-0.00184768	-0.00256603	-0.00373238	-0.00544519	-0.00779776	-0.0109441	-0.0149757	-0.0199466	-0.0258778	-0.0326593	-0.0401218	-0.0479841	-0.0559001	-0.0634235	-0.0701351	-0.0756542	-0.0796853	-0.0821393	-0.083097	-0.0828074	-0.0817368	-0.080469	-0.0796412	-0.0798551	-0.0815862	-0.0851078	-0.0904589	-0.0973632	-0.105337	-0.113702	-0.121662	-0.12846	-0.133458	-0.13621	-0.136493	-0.13438	-0.130155	-0.124345	-0.117473	-0.110083	-0.102655	-0.0954724	-0.0886427	-0.0820831	-0.0755575	-0.0687614	-0.0613927	-0.0532304	-0.0441998
-0.00117716	-0.000977538	-0.000547634	0.000167715	0.00122117	0.00271907	0.0046412	0.00701493	0.00975179	0.0126622	0.015565	0.0181197	0.0199766	0.0207421	0.0200953	0.0177298	0.0134372	0.00713118	-0.00123486	-0.0115451	-0.0236038	-0.0371771	-0.0519733	-0.0676659	-0.0838999	-0.100296	-0.116453	-0.13193	-0.146306	-0.159177	-0.170145	-0.178896	-0.185152	-0.188764	-0.189684	-0.187902	-0.183491	-0.176572	-0.167315	-0.155813	-0.142213	-0.126684	-0.109479	-0.0909424	-0.0715619	-0.0519699	-0.0329203	-0.0152178	0.000371594	0.0132305
-0.00150721	-0.00184768	-0.00256603	-0.00373238	-0.00544519	-0.00779776	-0.0109441	-0.0149757	-0.0199466	-0.0258778	-0.0326593	-0.0401218	-0.0479841	-0.0559001	-0.0634235	-0.0701351	-0.0756542	-0.0796853	-0.0821393	-0.083097	-0.0828074	-0.0817368	-0.080469	-0.0796412	-0.0798551	-0.0815862	-0.0851078	-0.0904589	-0.0973632	-0.105337	-0.113702	-0.121662	-0.12846	-0.133458	-0.13621	-0.136493	-0.13438	-0.130155	-0.124345	-0.117473	-0.110083	-0.102655	-0.0954724	-0.0886427	-0.0820831	-0.0755575	-0.0687614	-0.0613927	-0.0532304	-0.0441998
-0.00309836	-0.00299538	-0.0027435	-0.00225801	-0.00144431	-0.000139784	0.00169333	0.00414322	0.00717468	0.0106412	0.0143784	0.0180382	0.0212333	0.0235059	0.0244444	0.0236421	0.0207857	0.0156929	0.00824027	-0.00150571	-0.0133673	-0.0270978	-0.0423652	-0.0587822	-0.0759216	-0.0933283	-0.11053	-0.127026	-0.142348	-0.156062	-0.167752	-0.177102	-0.183839	-0.187825	-0.189028	-0.187456	-0.183195	-0.176386	-0.167207	-0.155763	-0.14223	-0.126762	-0.109632	-0.0912023	-0.0719801	-0.0526276	-0.0339349	-0.0167614	-0.00194159	0.00982174
0.176804	0.171991	0.162515	0.148669	0.130995	0.110175	0.08709	0.0628076	0.0385485	0.0154439	-0.00534834	-0.0229217	-0.0366306	-0.046152	-0.0515222	-0.0530891	-0.0513647	-0.0470796	-0.0409987	-0.0338992	-0.0264038	-0.0191486	-0.012611	-0.00719069	-0.00326353	-0.00116321	-0.00115036	-0.00340846	-0.00807884	-0.0151973	-0.0246926	-0.0363541	-0.0499357	-0.0650979	-0.0815393	-0.0988687	-0.116785	-0.134949	-0.152956	-0.17034	-0.186565	-0.200959	-0.212803	-0.221309	-0.225755	-0.22553	-0.220245	-0.20974	-0.194199	-0.174107
0.00369857	0.00432591	0.00559541	0.00753032	0.0101463	0.0134547	0.0173738	0.0217802	0.0265116	0.0312827	0.0357968	0.0397356	0.0427516	0.0445721	0.045006	0.0439741	0.0415072	0.0377347	0.0328516	0.0270754	0.0206021	0.0135708	0.00604808	-0.00196539	-0.0105044	-0.0195924	-0.0291889	-0.0391437	-0.0491719	-0.0588577	-0.0676911	-0.0751223	-0.0806462	-0.0838745	-0.0845981	-0.082824	-0.0787735	-0.0728593	-0.0656212	-0.0576782	-0.0495997	-0.0419356	-0.0351043	-0.0293919	-0.0249451	-0.0217844	-0.0198259	-0.0189057	-0.0188099	-0.0192995
-0.0664	-0.0693314	-0.0749702	-0.0828828	-0.0924299	-0.102856	-0.113331	-0.12298	-0.130988	-0.136737	-0.139715	-0.139648	-0.136517	-0.130465	-0.121795	-0.11087	-0.09809	-0.0838516	-0.0684902	-0.0524328	-0.0359879	-0.0195827	-0.00367013	0.0112501	0.0246851	0.0361933	0.0454468	0.0523682	0.0570734	0.0599718	0.0616762	0.0629371	0.0644308	0.0666658	0.0699254	0.0740465	0.0784589	0.0822356	0.0842358	0.0832265	0.0781121	0.0680851	0.0527689	0.0323869	0.00768768	-0.0200776	-0.0492497	-0.0779484	-0.10426	-0.126422
-0.00563612	-0.00621824	-0.00740008	-0.00921481	-0.0117095	-0.0149175	-0.0189107	-0.0237344	-0.0294375	-0.0359176	-0.0431081	-0.0508313	-0.0588105	-0.0666861	-0.0740196	-0.0803598	-0.0852175	-0.0882144	-0.0890935	-0.0877801	-0.0844159	-0.0793631	-0.0731799	-0.0665663	-0.0602885	-0.0550899	-0.0516044	-0.0502811	-0.051333	-0.0547156	-0.0601357	-0.06709	-0.0749238	-0.0829039	-0.0902935	-0.0964208	-0.100741	-0.102871	-0.102617	-0.0999732	-0.095116	-0.0883779	-0.0801527	-0.0709707	-0.06135	-0.0517522	-0.0425921	-0.0341914	-0.0267665	-0.0204286
-0.0110006	-0.0110048	-0.0110261	-0.0110265	-0.0109733	-0.0108079	-0.0105203	-0.0100617	-0.00939063	-0.00847706	-0.00722993	-0.00557373	-0.00339622	-0.00056424	0.00306536	0.00762382	0.0132007	0.0198095	0.0273506	0.0355729	0.0441143	0.0524389	0.0599113	0.0658433	0.0695778	0.0705601	0.0683669	0.0628957	0.0542658	0.0428742	0.0293449	0.0144789	-0.000894639	-0.0159176	-0.0298509	-0.0420461	-0.0520532	-0.0595745	-0.0644589	-0.0666815	-0.0663248	-0.063569	-0.0586882	-0.0520533	-0.0441273	-0.0354541	-0.0266308	-0.0182694	-0.0109451	-0.00514368
-0.0255756	-0.0276662	-0.0317866	-0.0378067	-0.045525	-0.0546427	-0.0648353	-0.0756557	-0.086625	-0.0972581	-0.107	-0.115366	-0.121913	-0.126262	-0.128162	-0.12742	-0.12397	-0.117859	-0.109241	-0.0983806	-0.0856479	-0.07151	-0.0565207	-0.0412992	-0.026503	-0.0128112	-0.000833711	0.00891917	0.0160459	0.0203495	0.0217769	0.0204975	0.016834	0.0112127	0.00411014	-0.00401658	-0.0127656	-0.0218773	-0.0311503	-0.0404915	-0.0498401	-0.0591017	-0.0681462	-0.0767361	-0.0844836	-0.090935	-0.0955928	-0.0979981	-0.0978029	-0.0948394
-0.0294377	-0.031968	-0.0369595	-0.0442672	-0.0536581	-0.0647742	-0.0772024	-0.0903763	-0.10362	-0.116307	-0.127661	-0.137017	-0.143772	-0.147457	-0.147792	-0.144643	-0.138076	-0.128337	-0.115808	-0.101023	-0.0845846	-0.067166	-0.0494698	-0.0322004	-0.0160321	-0.00157505	0.0106413	0.0202716	0.0271019	0.0311412	0.0325465	0.0316855	0.029054	0.0252138	0.0207292	0.0160947	0.0116891	0.00769844	0.00419947	0.00112219	-0.00168328	-0.00434383	-0.00702435	-0.0097153	-0.0123239	-0.0146628	-0.0164665	-0.0174613	-0.0174132	-0.0161756
-0.0284826	-0.0309363	-0.0357766	-0.0428851	-0.0520021	-0.06281	-0.0749073	-0.0877566	-0.10074	-0.113248	-0.124578	-0.13414	-0.141435	-0.146099	-0.147986	-0.147101	-0.143645	-0.137983	-0.130599	-0.122023	-0.112865	-0.103653	-0.0949205	-0.0870786	-0.0804197	-0.0751773	-0.0713754	-0.0688835	-0.0674357	-0.0665976	-0.0657818	-0.0643607	-0.0616478	-0.0570303	-0.050047	-0.0404683	-0.0283506	-0.0141021	0.00161349	0.0178696	0.0336048	0.0477606	0.0593697	0.0677596	0.0725819	0.0738687	0.0720162	0.0677079	0.0617984	0.0551772
-0.024466	-0.0263571	-0.0300697	-0.0354807	-0.0423528	-0.0503893	-0.0593122	-0.0687232	-0.0782412	-0.0875211	-0.0962123	-0.104064	-0.110887	-0.116557	-0.121043	-0.124321	-0.126409	-0.127348	-0.127165	-0.125948	-0.123769	-0.120742	-0.117015	-0.11277	-0.10823	-0.103567	-0.0989773	-0.0945349	-0.0902652	-0.0860863	-0.0818329	-0.0772897	-0.0722471	-0.066565	-0.0602366	-0.0534355	-0.0465283	-0.0400986	-0.0348067	-0.0313659	-0.0304041	-0.0323299	-0.037304	-0.0450947	-0.0551122	-0.0664935	-0.0781193	-0.0888094	-0.0974441	-0.103098
-0.0273986	-0.0297301	-0.0343281	-0.0410771	-0.0497349	-0.0599834	-0.0714451	-0.0836121	-0.0959028	-0.107752	-0.118505	-0.127622	-0.134647	-0.139263	-0.141359	-0.140965	-0.138298	-0.133722	-0.127704	-0.120762	-0.113421	-0.106144	-0.0993687	-0.0934005	-0.0884496	-0.0846406	-0.0819686	-0.0803221	-0.0795266	-0.0793166	-0.0793642	-0.0793064	-0.0787825	-0.0774816	-0.075193	-0.0718304	-0.0675249	-0.0625938	-0.0574806	-0.0527712	-0.049083	-0.0469606	-0.0468216	-0.0487899	-0.0527	-0.0580715	-0.0641392	-0.0699556	-0.0745112	-0.0768824
-0.0747607	-0.0763355	-0.0793319	-0.0834649	-0.0883631	-0.0935975	-0.0988035	-0.103635	-0.107823	-0.11123	-0.113693	-0.11514	-0.11549	-0.11465	-0.112505	-0.108934	-0.103841	-0.0971785	-0.0890316	-0.0795431	-0.0690617	-0.0580188	-0.0469538	-0.0364519	-0.0270843	-0.0193359	-0.0135415	-0.00984092	-0.00813871	-0.00809053	-0.00919782	-0.0107877	-0.0121266	-0.0125624	-0.0115386	-0.00871824	-0.00402459	0.00236138	0.0100331	0.018425	0.0268996	0.0348507	0.0417389	0.0472275	0.0511454	0.0535022	0.0544461	0.0542093	0.0530492	0.0511968
-0.0747607	-0.0763355	-0.0793319	-0.0834649	-0.0883631	-0.0935975	-0.0988035	-0.103635	-0.107823	-0.11123	-0.113693	-0.11514	-0.11549	-0.11465	-0.112505	-0.108934	-0.103841	-0.0971785	-0.0890316	-0.0795431	-0.0690617	-0.0580188	-0.0469538	-0.0364519	-0.0270843	-0.0193359	-0.0135415	-0.00983855	-0.00813416	-0.00808201	-0.00918235	-0.0107364	-0.0120335	-0.0123978	-0.0112545	-0.00823994	-0.00323899	0.00362009	0.0120003	0.0214234	0.0313565	0.0413109	0.0508685	0.0598052	0.0680359	0.0756085	0.0826406	0.0892467	0.0954684	0.101223
0.00876475	0.0109912	0.0153204	0.0215096	0.0292078	0.0379917	0.047318	0.0566984	0.0655962	0.073555	0.080211	0.0853135	0.0887372	0.090475	0.0906138	0.0893612	0.0869356	0.0836034	0.0796961	0.0754593	0.0711774	0.0670737	0.0633029	0.0599359	0.056951	0.0542395	0.0516471	0.0489386	0.0459327	0.042487	0.0385464	0.03417	0.0294573	0.0247199	0.0201989	0.0162138	0.013057	0.0109412	0.00995848	0.0101336	0.0113787	0.0134182	0.015925	0.018459	0.0205215	0.0215468	0.0210125	0.0184887	0.0137003	0.00658567
-0.00800151	-0.00803419	-0.00806829	-0.00803541	-0.00784285	-0.00735366	-0.00647082	-0.00506108	-0.00304692	-0.000361481	0.00294407	0.00676149	0.0109026	0.0151248	0.0191699	0.0227502	0.025723	0.0279727	0.0295109	0.0304577	0.0310035	0.031373	0.0317674	0.0323192	0.0330602	0.0339122	0.0347237	0.0352389	0.0352346	0.034522	0.0330014	0.0306851	0.0276946	0.0242926	0.0207706	0.0175138	0.0148162	0.0129844	0.0121957	0.0125537	0.0140378	0.0164782	0.019659	0.023237	0.0267523	0.0297853	0.0318883	0.0326854	0.0319123	0.0294476
-0.0119612	-0.0122087	-0.0126888	-0.0134369	-0.0144845	-0.0158979	-0.0177797	-0.0201821	-0.0232637	-0.0271324	-0.031854	-0.0374912	-0.0440356	-0.0514044	-0.0594204	-0.0678201	-0.076257	-0.0843142	-0.0915754	-0.0976056	-0.102071	-0.104724	-0.105475	-0.104392	-0.101705	-0.0977628	-0.0929795	-0.087766	-0.0824556	-0.0772502	-0.0721843	-0.0671173	-0.06181	-0.0559774	-0.0493272	-0.0416514	-0.0329134	-0.0232681	-0.0129416	-0.00229666	0.00827377	0.0184864	0.0281616	0.0372558	0.045998	0.0546795	0.0636681	0.0733231	0.0838991	0.095387
-0.0119612	-0.0122087	-0.0126888	-0.0134369	-0.0144845	-0.0158979	-0.0177797	-0.0201821	-0.0232637	-0.0271324	-0.031854	-0.0374912	-0.0440356	-0.0514044	-0.0594204	-0.0678201	-0.076257	-0.0843142	-0.0915754	-0.0976056	-0.102071	-0.104724	-0.105475	-0.104392	-0.101705	-0.0977619	-0.0929779	-0.0877629	-0.0824503	-0.0772411	-0.072169	-0.0670924	-0.0617707	-0.0559169	-0.0492143	-0.0414768	-0.0326469	-0.0228661	-0.0123411	-0.00140765	0.00961097	0.0204445	0.0310077	0.0413526	0.0518279	0.0628661	0.0749919	0.0887267	0.104478	0.122358
0.0227519	0.0239252	0.0260794	0.0288568	0.0317873	0.0343797	0.0361194	0.0366888	0.0358789	0.0337257	0.0304294	0.0264082	0.0221661	0.0182328	0.0150853	0.0130801	0.0124043	0.0131064	0.0150891	0.0180831	0.0218161	0.0259743	0.0302468	0.0343436	0.0380008	0.0409832	0.0431082	0.044188	0.0441314	0.0428898	0.0405501	0.0372628	0.0332118	0.0287606	0.0242401	0.0199623	0.0162113	0.013213	0.0110361	0.00967225	0.00900544	0.00869829	0.00845066	0.00782114	0.00638558	0.00375821	-0.000378702	-0.00612456	-0.0134119	-0.0219379
-0.0120446	-0.0104755	-0.00729254	-0.00248067	0.00397155	0.0120547	0.0216252	0.0325207	0.0443932	0.0567707	0.0690994	0.0806744	0.0907593	0.0986263	0.103636	0.105314	0.103426	0.0980142	0.0894758	0.0784086	0.0656922	0.0523121	0.0392571	0.0274027	0.0174106	0.00966426	0.00427089	0.0010189	-0.000463779	-0.000696856	-0.000172654	0.000653295	0.00141579	0.00198244	0.00229991	0.0024515	0.00258937	0.00290558	0.00351383	0.00450838	0.00589446	0.00755957	0.0093691	0.0110281	0.012334	0.0130552	0.0130203	0.0121745	0.0105944	0.00849443
0.0218265	0.0229156	0.0249043	0.0274416	0.0300678	0.0323065	0.0336627	0.033842	0.0326619	0.030185	0.0266368	0.0224555	0.0181595	0.0142798	0.011292	0.00953837	0.00918527	0.010256	0.0126261	0.0159995	0.0200796	0.0245322	0.0290305	0.0332722	0.0369856	0.0399306	0.0419235	0.0427787	0.0424112	0.040784	0.0380013	0.0342363	0.0297012	0.0247914	0.0198704	0.015281	0.0113322	0.00826698	0.00615832	0.00499352	0.00464059	0.0047592	0.00499661	0.00489792	0.00402059	0.00194975	-0.00160217	-0.00672685	-0.0133218	-0.0210338
-0.00946468	-0.00936384	-0.00912315	-0.00866642	-0.00788995	-0.00664446	-0.00483103	-0.00228397	0.00112217	0.00540387	0.0105741	0.0165353	0.0230939	0.0299629	0.0367854	0.0431685	0.0487318	0.0531581	0.0562377	0.057896	0.0581953	0.0573207	0.0555324	0.0531149	0.0503231	0.0473427	0.0442914	0.0411565	0.0379072	0.0344631	0.0308102	0.0269477	0.0229423	0.0189679	0.0152082	0.0118758	0.00918048	0.00725031	0.00612152	0.00575809	0.00600734	0.00660767	0.00719658	0.00744611	0.00695154	0.00538863	0.00254378	-0.00167909	-0.00715062	-0.013563
-0.014198	-0.014209	-0.0142162	-0.0141891	-0.0140959	-0.0138905	-0.0135844	-0.0131704	-0.0126742	-0.0121391	-0.011615	-0.011146	-0.0107602	-0.0104548	-0.0101845	-0.00986018	-0.00935185	-0.00850096	-0.00714025	-0.00512394	-0.00235431	0.00119179	0.00543792	0.0102012	0.0151996	0.0200766	0.0244622	0.0279537	0.0302614	0.0311935	0.0307094	0.0288989	0.0260387	0.0224809	0.0186454	0.0149653	0.0118271	0.00952891	0.0082374	0.00804574	0.00882538	0.0103644	0.0123236	0.0142732	0.0157281	0.0161937	0.0152141	0.0124375	0.00766542	0.000898686
-0.00946468	-0.00936147	-0.00911859	-0.00865791	-0.00787447	-0.00661711	-0.00478402	-0.00220538	0.00124996	0.00560763	0.0108882	0.0170063	0.0237814	0.0309395	0.0381362	0.0449877	0.0511181	0.0562082	0.0600376	0.0625126	0.0636683	0.063656	0.0626985	0.0610423	0.0589083	0.0564536	0.0537764	0.0508513	0.0476474	0.044088	0.0401695	0.0359047	0.031376	0.0267741	0.0222999	0.0181835	0.0146514	0.011848	0.00982417	0.0085566	0.00792533	0.00767451	0.00744438	0.00695473	0.00582759	0.00378308	0.000705647	-0.00336579	-0.00819038	-0.0132718
-0.00946468	-0.00936384	-0.00912315	-0.00866642	-0.00788995	-0.00664446	-0.00483103	-0.00228397	0.00112217	0.00540328	0.010573	0.0165332	0.0230901	0.0299561	0.0367738	0.0431491	0.0487002	0.0531081	0.0561608	0.0577809	0.0580279	0.0570838	0.0552064	0.0526785	0.0497549	0.0466232	0.0434052	0.0400933	0.0366673	0.0330557	0.0292548	0.0252729	0.0211833	0.0171627	0.0133926	0.0100787	0.00741831	0.00552331	0.00441108	0.00402625	0.00422091	0.00471739	0.00514156	0.00519572	0.00451421	0.00281456	-1.38891e-05	-0.0039281	-0.0086868	-0.0137996
-0.00946468	-0.00936384	-0.00912315	-0.00866642	-0.00788995	-0.00664446	-0.00483103	-0.00228397	0.00112217	0.00540328	0.010573	0.0165332	0.0230901	0.0299561	0.0367738	0.0431491	0.0487002	0.0531081	0.0561608	0.0577809	0.0580279	0.0570838	0.0552064	0.0526785	0.0497549	0.0466232	0.0434052	0.0400933	0.0366673	0.0330557	0.0292548	0.0252729	0.0211833	0.0171627	0.0133926	0.0100787	0.00741831	0.00552331	0.00441108	0.00402625	0.00422091	0.00471739	0.00514156	0.00519572	0.00451421	0.00281456	-1.38891e-05	-0.0039281	-0.0086868	-0.0137996
-0.00946468	-0.00936384	-0.00912315	-0.00866642	-0.00788995	-0.00664446	-0.00483103	-0.00228397	0.00112217	0.00540328	0.010573	0.0165332	0.0230901	0.0299561	0.0367738	0.0431491	0.0487002	0.0531081	0.0561608	0.0577809	0.0580279	0.0570838	0.0552064	0.0526785	0.0497549	0.0466232	0.0434052	0.0400933	0.0366673	0.0330557	0.0292548	0.0252729	0.0211833	0.0171627	0.0133926	0.0100787	0.00741831	0.00552331	0.00441108	0.00402625	0.00422091	0.00471739	0.00514156	0.00519572	0.00451421	0.00281456	-1.38891e-05	-0.0039281	-0.0086868	-0.0137996
0.00856046	0.0107829	0.0151068	0.0212944	0.0290011	0.0378156	0.0472046	0.0566924	0.0657541	0.0739447	0.0809074	0.0863932	0.0902719	0.0925228	0.0932112	0.0925153	0.090618	0.0877483	0.0842007	0.0801894	0.0759763	0.0717736	0.0677383	0.0639563	0.0604324	0.0570926	0.0538222	0.0504285	0.0467662	0.042726	0.0382791	0.0335009	0.0284995	0.0235872	0.0189999	0.015047	0.0120089	0.0100855	0.00935662	0.00983621	0.0114271	0.0138451	0.0167539	0.019703	0.0221808	0.0236048	0.0234363	0.0212248	0.0166769	0.00971593
-0.00946468	-0.00936147	-0.00911859	-0.00865791	-0.00787447	-0.00661711	-0.00478402	-0.00220538	0.00124996	0.00560763	0.0108882	0.0170063	0.0237814	0.0309395	0.0381362	0.0449877	0.0511181	0.0562082	0.0600376	0.0625126	0.0636683	0.063656	0.0626985	0.0610423	0.0589083	0.0564536	0.0537764	0.0508513	0.0476474	0.044088	0.0401695	0.0359047	0.031376	0.0267741	0.0222999	0.0181835	0.0146514	0.011848	0.00982417	0.0085566	0.00792533	0.00767451	0.00744438	0.00694384	0.00580666	0.00374397	0.00063458	-0.00349138	-0.00840626	-0.0136327
0.00874231	0.0109613	0.0152742	0.0214363	0.0290887	0.0378035	0.0470287	0.0562662	0.064968	0.072667	0.0789903	0.0836815	0.0866153	0.087792	0.0873145	0.0854155	0.0823465	0.0784129	0.0739868	0.0693519	0.0648241	0.0606464	0.0569798	0.0538866	0.0513231	0.0491479	0.0471676	0.0451064	0.0427447	0.0399081	0.0365179	0.0326184	0.0283033	0.0238854	0.0196122	0.0158126	0.0127904	0.0107688	0.00985021	0.0100674	0.0113394	0.0133955	0.0159123	0.018452	0.0205179	0.0215449	0.0210127	0.0184888	0.0137003	0.00658567
-0.0194399	-0.0187912	-0.0174898	-0.0155302	-0.0129094	-0.00961403	-0.00570196	-0.00116798	0.00390574	0.0094335	0.015299	0.0213514	0.02741	0.0332698	0.0387179	0.0435531	0.047608	0.0507647	0.0530279	0.0543977	0.0550031	0.054998	0.0545407	0.0537599	0.0527257	0.0514372	0.0498489	0.0478257	0.0452695	0.0421091	0.0383406	0.03406	0.0293923	0.0246643	0.020125	0.0161063	0.01287	0.0106411	0.009501	0.00946205	0.0104245	0.0121025	0.0141622	0.0161629	0.0176134	0.0179649	0.0167216	0.0134894	0.00803527	0.00034216
-0.0255753	-0.0276658	-0.031786	-0.0378242	-0.045559	-0.0547065	-0.0649518	-0.0758626	-0.0869822	-0.0978574	-0.107978	-0.116917	-0.124305	-0.129849	-0.133392	-0.134835	-0.134193	-0.131565	-0.12711	-0.121037	-0.113582	-0.105004	-0.0955779	-0.0855913	-0.0753517	-0.0652055	-0.0554881	-0.0465276	-0.0386609	-0.0321462	-0.0272151	-0.0239677	-0.0224154	-0.0224789	-0.0240122	-0.0268334	-0.0307514	-0.0356325	-0.0413256	-0.0477194	-0.054689	-0.062038	-0.0695179	-0.076769	-0.0832876	-0.0885202	-0.0918849	-0.0928647	-0.0910796	-0.0863531
[truncated: 395 more columns]
