# Supplementary material for: Discovery of a heparan sulfate binding domain in monkeypox virus H3 as an anti-poxviral drug target combining AI and MD simulations
Source: eLife. 2025 Jan 16;13:RP100545. doi: 10.7554/eLife.100545 (PMC11737874; doi:10.7554/eLife.100545)
Supplement: Figure 3—source data 3. [file elife-100545-fig3-data3.xlsx]

## Sheet: Sheet1
H3(240-282) unfold-ΔLc (nm)	H3(240-282) unfold-Force (pN)	H3(1-239) unfold-ΔLc (nm)	H3(1-239) unfold-Force (pN)	H3(1-282) unfold-ΔLc (nm)	H3(1-282) unfold-Force (pN)
8.08816	63.8343	80.8018	193.942	97.2067	65.4707
16.0313	41.3079	84.0016	66.9355	97.0115	129.122
15.9184	52.6958	90.5095	80.5758	91.0362	101.426
13.5251	61.5208	84.4201	104.732	93.1514	53.5811
12.8356	87.7288	88.9992	56.1373	93.9225	58.1732
12.7376	66.7654	88.2501	57.6257	109.025	40.7298
13.9154	44.5917	89.4845	52.0503	93.2131	46.688
12.6294	99.3639	88.1515	53.6462	95.4135	26.5633
13.1917	70.0522	81.5705	49.6222	93.1557	89.6774
12.2097	75.3291	81.3406	47.0367	106.531	58.9214
14.1256	42.7307	88.8284	89.7958	97.8112	60.941
13.1052	32.5448	88.7622	59.1301	107.853	49.8748
13.1607	162.061	85.2193	113.292	111.211	86.5142
12.9837	37.1699	81.4622	76.7548	112.432	62.4988
13.0964	59.1369	80.4262	54.2262	99.807	71.7319
12.6888	49.5101	80.9611	109.348	99.3184	91.778
13.3894	60.4458	78.7541	63.4793	104.944	45.5394
13.9159	49.1822	83.7314	107.254	100.6	80.5876
13.4346	33.8092	82.1222	97.9955	99.2574	98.8882
14.5165	34.8794	81.1792	127.6	105.718	37.2201
13.0491	91.5313	82.7303	68.6509	92.4954	45.441
12.2257	108.384	90.5528	41.7658	108.208	77.4187
11.6333	98.2412	87.3671	126.849	105.511	59.641
12.4691	120.074	81.5841	55.6767	104.349	51.497
13.7567	56.2017	82.1852	81.929	99.9377	27.7051
14.5241	51.4242	90.8611	48.9865	94.038	41.9205
14.3788	88.0647	82.0765	75.8942	109.507	39.7786
12.6571	107.612	80.1073	85.7865	95.0612	80.94
14.7026	85.7047	80.9506	164.926	101.534	118.125
13.4844	46.4653	80.3106	76.9584	102.621	38.068
11.9654	60.1772	79.5551	149.938	95.4448	113.503
10.597	63.8651	88.0459	150.102	93.8113	112.206
13.839	89.724	82.7689	93.7827	95.3035	90.7492
14.4605	81.0307	82.1978	137.247	105.934	40.038
12.5628	55.932	77.4981	47.0639	94.3965	65.9805
10.9909	92.5261	80.6494	119.549	99.629	78.8612
8.05389	64.1047	82.4183	136.288	105.383	76.335
10.4895	146.05	81.3212	84.8131	106.18	49.9793
11.0307	79.0516	79.3909	64.6636	100.702	66.1826
14.4267	98.3388	78.0246	31.6261	100.933	101.042
14.4234	69.2637	84.5992	118.915	93.9114	46.8864
13.1088	37.1563	79.0603	45.7265	100.455	82.5149
9.77634	94.7748	86.9782	64.3736	100.02	71.0805
14.1232	77.6101	86.3515	53.6327	97.2688	93.6573
14.1443	95.3739	80.5433	72.9418	98.8096	140.968
13.0613	70.1088	79.9201	60.5039	110.87	100.831
8.17794	43.7157	87.7902	101.347	92.9133	82.9489
14.4148	53.6836	89.029	96.4149	91.9127	77.7708
14.3972	40.9138	89.7936	72.4692	102.456	53.8535
8.32074	94.255	88.7334	117.536	98.8694	63.4192
14.8736	40.1953	79.2266	96.1341	112.852	43.9203
12.8652	96.8742	84.3393	118.581	106.188	166.472
13.0753	67.3049	85.2572	85.7282	98.5948	54.3071
13.739	34.5739	85.7014	73.4874	94.1204	93.3804
13.0309	102.835	80.9251	107.735	96.9354	42.7783
14.7102	87.4333	79.1061	36.5188	111.48	50.5318
14.1664	74.9196	84.0984	94.9384	104.24	70.8027
13.413	107.906	77.7547	81.8257	108.826	54.7089
11.3857	96.6473	79.8274	60.6947	98.4928	45.8731
11.0762	64.5046	86.2518	30.3798	103.576	85.2398
14.3864	118.121	80.6323	112.635	99.6697	83.1491
13.1724	122.297	88.0799	43.3396	99.9663	109.331
14.6691	40.1692	84.0078	86.2792	112.312	126.792
14.7448	93.2078	81.9807	68.7034	98.853	141.003
13.605	89.4155	78.8285	57.6984	103.769	107.832
13.6509	50.9421	86.4272	97.4551	97.866	65.1421
12.8767	72.67	87.7069	129.132	103.337	143.114
14.2724	44.7226	80.8147	113.041	101.471	145.062
6.98754	75.2211	80.4789	73.2523	111.445	95.6061
14.5704	69.4451	89.5847	55.8849	105.682	88.0885
7.2368	95.6253	88.2813	79.2177	91.5353	75.7474
13.0893	94.6281	81.3379	72.9774	93.6666	47.8965
13.6086	59.6428	86.8719	37.0185	89.8119	157.306
7.70918	91.4496	80.1073	125.037	98.5614	60.8158
13.0769	43.7282	83.4489	128.196	92.4462	69.1225
8.5613	89.3088	83.8702	96.8796	104.497	49.7671
11.0789	45.921	83.046	58.7607	91.4837	78.2489
10.795	81.6273	78.879	92.9044	94.4826	142.361
9.74999	106.613	84.4189	99.8246	92.4054	86.1459
14.3468	50.7532	87.4759	71.2093	94.8246	30.496
13.5526	94.057	84.334	125.3	90.6944	72.7539
18.806	98.126	89.8194	41.2897	100.224	43.7319
6.37129	87.5102	89.8665	123.727	96.9937	71.3633
12.3768	106.474	80.9253	48.6823	89.1833	95.7103
10.3133	134.009	83.2238	80.9399	92.5777	54.009
14.6974	70.6842	83.7993	46.4699	107.779	102.242
13.9388	56.5045	90.0012	74.8816	96.0845	77.5651
13.0837	42.7904	80.8984	76.565	110.663	35.8404
13.4282	61.5985	84.6579	141.582	97.895	55.1194
10.9215	63.6114	89.3446	83.6726	97.7203	69.0114
14.7392	43.5374	80.4801	35.0784	95.2431	61.3852
13.4645	69.1101	82.6498	118.996	104.134	81.675
12.8283	89.5511	84.0248	67.278	104.123	128.148
14.7379	78.4412	87.4343	117.833	94.4545	54.4788
15.6845	51.314	78.6854	87.1086	109.161	67.5656
7.16469	64.2922	79.135	104.072	99.1047	94.8706
15.8585	81.1733	90.0162	191.925	100.714	44.9685
12.7319	106.545	86.6266	118.063	99.6292	82.7004
14.6116	71.8913	78.6941	65.537	90.0677	52.4782
12.092	116.587	84.2692	93.2986	91.6594	122.339
12.707	45.951	83.895	75.9763	111.31	68.2206
10.696	68.4316	84.0743	26.9148	103.985	79.0851
11.8088	117.932	82.1623	33.7163	101.016	83.6614
12.4447	121.792	86.686	69.5043	99.1077	129.315
11.0335	70.7942	88.5926	117.209	96.5202	95.8414
12.5034	50.2158	83.7473	125.942	99.4907	57.7211
14.7664	36.8393	85.2377	102.949	109.588	78.5792
11.9898	52.1128	90.1641	111.743	91.7346	97.7787
12.0654	47.7551	89.2024	45.437	94.6398	94.1015
13.176	52.5804	82.4847	68.8381	103.74	54.2931
16.0774	45.3992	85.9971	114.959	96.2438	54.7906
14.8201	83.2069	86.1162	90.3894	105.977	30.501
8.78157	50.3566	82.0069	52.633	96.8008	25.4084
15.3561	53.6051	88.7061	43.4458	95.8895	30.9977
13.637	74.2863	77.2214	109.404	103.052	53.1481
15.9819	65.0027	83.1786	135.751	89.0811	36.6956
13.08	71.1966	84.6714	110.009	89.4369	29.505
14.158	60.7902	79.9335	38.4199	101.536	27.5463
16.78	81.5148	88.7864	27.3368	105.101	26.3362
10.0838	69.6275	87.2073	58.3093	90.7565	39.6501
13.945	57.9778	80.9565	143.662	103.422	118.787
9.16704	121.469	83.8801	65.0365	93.1133	143.991
12.9807	62.451	77.4039	53.3082	94.4	161.602
13.4749	36.5614	87.1242	99.8561	108.806	71.3742
13.27	72.3335	88.419	42.6298	92.8253	53.0409
15.2089	70.6039	81.9931	118.14	109.424	71.9225
11.6441	62.1633	87.0405	64.467	98.9058	60.3922
15.0324	50.4102	81.3081	101.722	95.0116	33.8696
12.8841	66.2141	88.6822	121.975	89.056	111.12
11.5756	55.9536	80.4501	119.302	95.2528	91.292
13.1392	64.284	84.3074	148.938	99.9696	56.1347
14.5222	237.624	79.3637	150.207	98.7413	22.5501
10.1959	61.8294	86.3606	60.8458	97.4088	112.285
13.4243	85.2845	89.1704	92.1025	98.7291	29.9859
15.1829	84.1334	87.8056	100.784	89.718	88.5707
14.2494	98.097	87.873	149.222	96.8562	53.9404
7.43802	55.1081	89.476	87.9276	103.746	71.1238
13.2163	58.8313	77.0107	118.584	100.743	74.9108
11.8551	155.671	78.1791	79.7848	89.9503	85.8715
		82.384	96.8548	100.207	76.1089
		77.5148	107.682	102.432	108.693
		77.2566	153.537	95.2815	100.266
		84.4459	132.834	98.5675	84.1918
		89.8534	53.7219	95.0235	99.5896
		64.4577	153.261	105.939	168.008
		86.2197	115.807	104.611	75.4241
		63.6158	104.173	107.666	85.3933
		90.087	109.985	97.2096	52.15
		84.8925	135.19	89.3734	175.143
		78.3526	105.68	97.8175	68.9429
		78.0468	71.985	110.311	58.6686
		84.4114	142.44	92.7079	61.9361
		70.0445	171.671	109.054	74.1261
		83.0436	161.68	104.503	52.5432
		85.6764	155.171	110.554	45.5527
		83.5115	142.595	90.4685	89.7646
		86.7391	130.858	108.09	211.823
		81.3218	62.2319	106.815	83.6363
		76.7965	62.1058	107.253	107.192
		86.6744	140.22	103.059	81.4723
		86.6652	165.067	107.934	107.65
		73.3999	150.927	89.7679	71.8882
		78.7744	52.4267	95.6983	101.067
		85.1625	86.3059	103.882	72.3704
		86.3418	68.2917	103.85	78.228
		86.7427	114.197	90.1057	128.913
		88.6406	125.078	95.5575	185.882
		88.7642	93.605	100.477	63.5743
		84.9475	132.852	90.1142	111.283
		80.5253	99.4089	91.7671	109.737
		83.0468	129.386	108.513	79.6267
		87.2289	124.104	101.699	100.156
		86.3469	120.504	103.051	116.206
		84.8215	122.803	108.886	90.7147
		85.8696	123.071	91.4153	81.1967
		84.1175	127.568	100.99	77.9346
		80.7628	56.8268	112.31	107.555
		70.0229	103.942	103.971	96.636
		77.579	112.239	102.223	112.94
		87.0524	79.4575	106.452	71.3949
		78.6903	105.81	99.9255	175.775
		79.38	105.663	100.141	83.594
		87.897	148.902	102.174	120.256
		85.5671	132.346	103.735	61.9334
		84.0797	118.872	100.886	62.1542
		89.2988	136.997	104.986	154.89
		82.9493	157.074	103.562	89.9493
		86.6445	144.307	94.3193	90.0441
		78.89	102.697	97.416	70.5735
		80.5124	77.3722	112.709	93.7231
		76.3173	88.1143	107.979	71.4086
		90.4395	76.4503	94.3569	69.1105
		90.0459	124.291	93.8887	124.273
		89.4553	73.2003	93.1784	76.5166
		87.9711	88.3787	92.5519	99.3997
		70.3231	117.88	97.2261	124.488
		79.6797	83.6152	94.4034	87.1936
		79.2829	123.984	95.1055	91.4337
		75.1707	55.6745	111.977	63.2705
		79.1205	77.0116	105.403	73.2188
		88.9231	117.102	96.6635	75.6085
		78.8138	50.2691	95.8521	84.0202
		88.9868	128.818	89.6308	117.434
		80.1444	157.605	103.436	84.699
		82.6644	100.576	98.9501	93.853
		84.7112	99.7605	108.193	75.8322
		79.9361	141	106.337	79.0154
		83.2681	68.8193	110.862	142.261
		80.9688	83.8521	94.5529	60.0371
		86.0508	137.836	98.1828	80.8112
		80.7749	48.9985	93.161	59.8425
		80.7735	77.9458	94.4341	76.731
		79.8173	126.81	108.749	88.3008
		82.8039	84.1911	99.5404	58.8147
		80.6822	105.784	92.6639	83.7911
		82.7532	85.3313	95.6978	65.0699
		85.757	64.8213	98.9268	73.6886
		78.5782	106.595	92.0657	77.9873
		85.1717	128.025	91.6258	85.8224
		83.8499	44.4488	110.993	84.3916
		84.9658	98.466	98.9862	80.1422
		82.7245	112.683	94.9828	158.556
		80.8314	113.098	93.1491	146.58
		65.3379	72.9819	107.222	63.9514
		84.0926	146.863	96.1623	110.427
		89.1051	76.7516	94.9243	67.8476
		82.0797	137.755	93.8003	159.994
		83.5179	157.467	94.3843	68.1329
		79.1665	141.736	94.5724	70.6564
		89.1868	85.11	95.9788	70.1429
		78.6524	110.194	92.0952	138.438
		81.3961	86.1433	93.9407	36.0245
		79.2211	115.122	90.9653	136.245
		77.6665	105.243	96.433	130.571
		73.9817	66.8993	97.0585	87.1348
		83.2799	72.6603	94.8002	47.748
		82.6391	173.838	102.397	55.1752
		81.3781	82.1966	105.407	84.8986
		88.7114	78.3386	109.799	121.228
		90.5045	63.5231	92.5618	114.159
		77.74	102.413	95.3926	70.5689
		78.1521	151.143	103.082	92.8194
		80.3792	73.4444	98.0558	61.0616
		64.9026	119.736	95.9973	65.7606
		88.5711	144.895	99.7015	88.1922
		89.6125	127.759	93.4853	91.9886
		73.3524	108.916	100.75	71.3318
		87.6059	81.006	91.0283	73.9895
		84.4533	109.395	96.6837	70.8693
		84.7117	179.02	101.377	81.7768
		83.7304	129.703	97.7691	107.273
		82.1311	68.4716	109.064	57.3299
		83.3547	134.675	106.104	69.7824
		82.7437	147.735	98.8027	74.2894
		89.3789	74.2846	107.333	62.9575
		90.2111	81.081	97.6704	78.965
		81.9207	164.459	95.2128	87.5779
		85.5054	93.3148	90.5733	73.0787
		83.008	90.3564	109.57	125.896
		85.1815	52.1163	93.9591	88.5723
		77.2954	161.514	93.3952	73.0552
		88.2554	94.91	110.436	67.7225
		78.6176	66.6419	95.6651	67.3049
		87.2448	103.756	95.968	122.08
		83.8114	105.508	108.199	96.1487
		79.6656	133.092	96.8452	122.986
		84.6004	75.071	97.8158	107.025
		85.9148	79.177	96.7745	119.626
		72.972	95.6484	111.897	131.904
		85.8441	90.3926	106.019	144.409
		81.2879	110.307	95.3874	79.5793
		88.0347	61.5272	97.8468	79.1014
		82.6736	131.527	93.2616	150.814
		74.1595	73.7549	95.054	99.5194
		78.4938	75.0425	103.155	118.246
		82.9175	139.927	95.9265	209.05
		84.3713	55.0256	101.603	61.0237
		85.2235	64.1555	94.2845	137.321
		82.4589	112.898	98.8936	143.477
		85.4575	123.658	91.7018	157.871
		81.7909	55.8749	98.5292	160.926
		80.7355	115.4	98.2616	119.362
		83.1479	48.1541	97.7354	87.5538
		78.9956	60.8566	89.1752	173.452
		88.562	107.396	98.2071	108.832
		85.8943	79.9165	105.148	61.3879
		90.2557	79.7616	92.2157	138.397
		90.3771	56.4576	103.81	68.6898
		88.8943	174.083	95.4245	66.42
		88.7602	65.5168
		80.5469	77.2114
		82.6565	123.499
		87.9444	59.6247
		84.6428	116.234
