# Supplementary material for: Discovery of a heparan sulfate binding domain in monkeypox virus H3 as an anti-poxviral drug target combining AI and MD simulations
Source: eLife. 2025 Jan 16;13:RP100545. doi: 10.7554/eLife.100545 (PMC11737874; doi:10.7554/eLife.100545)
Supplement: Figure 4—source data 1. [file elife-100545-fig4-data1.xlsx]

## Sheet: Sheet1
WT unbinding force (pN)	uncharged unbinding force (pN)	Control force (pN)
46.977	<3	3.6537
35.2263	40.5992	4.24402
22.9932	<3	6.8994
37.7603	45.0674	3.33209
36.2445	20.3854	5.00764
50.4216	37.8053	<3
11.6629	29.7325	<3
31.9498	5.87157	3.31942
40.522	<3	<3
18.1362	<3	<3
11.1433	31.6291	3.1244
7.04986	4.7873	<3
12.776	38.7853	<3
40.2605	27.6851	<3
34.9695	<3	3.0403
31.8124	<3	<3
35.2988	34.711	<3
8.05914	3.689	3.53047
50.0795	38.2564	<3
29.2023	15.3952	<3
57.3043	17.4821	<3
36.3037	26.0094	4.859
31.9778	61.381	<3
11.4331	36.0974	22.4217
9.1759	20.2141	20.2118
10.7654	28.373	16.7065
36.7385	18.6945	3.79884
48.171	3.3119	17.11
35.4149	25.113	5.08608
32.8434	36.4402	3.79277
30.829	<3	<3
39.2278	38.3554	15.8461
17.805	21.6104	3.24885
25.2783	53.1888	<3
43.7422	41.1902	15.7051
27.2665	41.1157	<3
26.9993	22.0785	<3
11.8878	29.2543	17.913
9.056	6.6397	24.0686
37.0988	19.2448	16.6419
24.5841	<3	<3
51.2183	3.5083	3.00525
7.7384	46.5745	<3
13.9486	40.2369	<3
31.8754	9.1694	<3
36.1577	11.5067	<3
9.6847	23.5243	<3
12.6818	10.5299	<3
16.1249	35.0854	<3
67.9343	22.335	<3
45.0038	24.0882	<3
4.25067	<3	<3
40.4278	6.4094	18.9735
5.66333	<3	4.13
5.54781	33.92	<3
11.0246	<3	15.1547
33.9616	22.722	<3
35.0031	29.4711	<3
12.0539	<3	<3
8.58781	32.338	<3
44.4811	6.243	<3
26.1132	27.9219	<3
9.53388	59.7178	<3
52.0678	22.968	<3
45.9721	24.9021	<3
9.55937	40.3183	<3
4.0952	38.6771	<3
39.6048	24.9831	<3
14.2577	5.5123	<3
35.9119	27.7097	<3
48.0395	34.7062	<3
48.1982	5.7588	<3
42.7737	29.6958	<3
47.3961	23.2525	24.0528
9.02762	19.9584	<3
10.2238	27.9019	<3
8.4059	35.2726	<3
31.4415	24.2637	<3
29.6952	26.4627	<3
31.4744	26.3927	<3
40.7687	38.4618	<3
38.2013	32.8269	12.613
37.8883	<3	<3
38.6296	<3	3.5079
35.189	24.4897	<3
34.4244	23.7605	<3
58.3521	3.6541	<3
63.6379	7.4508	<3
64.3072	41.7607	<3
41.5717	50.9129	<3
11.9363	21.1104	3.3013
48.2623	35.6151	<3
65.5106	3.507	<3
46.3745	3.3724	3.3369
13.0884	23.8309	<3
14.3957	<3	<3
14.2303	31.2946	15.8239
16.619	34.6022	13.5588
13.5129	30.1131	<3
41.1699	25.7389	<3
54.2385	41.2489	<3
52.0744	<3	<3
40.668	30.831	<3
10.6274	4.033	<3
13.5734	5.74888	<3
9.97202	<3	<3
10.8063	<3	<3
43.7508	25.3727	<3
33.8727	7.2397	<3
35.7726	34.0465	<3
11.5811	3.346	<3
36.666	<3	<3
31.2344	<3	<3
74.23	7.901	<3
38.7693	5.8854	<3
43.8616	3.2	<3
15.0433	41.3689	<3
11.6224	27.5254	<3
31.3313	51.9648	<3
39.606	8.8289	12.7943
32.8172	61.8573	3.4665
7.10465	63.3972	17.3677
6.39343	35.1974	<3
38.9767	<3	<3
30.7167	<3	<3
53.3068	<3	<3
55.264	3.672	<3
44.137	37.5162	<3
45.0089	28.526	<3
80.5836	9.17071	<3
67.5826	24.8659	<3
45.1233	7.704	<3
13.5231	5.0641	13.6436
49.2317	26.7008	<3
7.314	11.7422	<3
60.0465	5.778	3.0474
50.6433	41.0793	4.01489
84.7775	<3	6.0159
42.778	28.5229	5.4708
37.6053	8.2843	19.02
40.5415	26.092	16.9608
12.0231	3.6322	<3
9.49649	9.8736	21.6576
46.8457	39.5069	<3
14.5471	5.8358	<3
12.5352	67.4233	<3
12.13	24.3869	<3
33.0108	5.7849	<3
30.369	5.049	3.64659
44.0229	24.625	<3
35.8772	34.0694	<3
21.9065	62.8348	<3
55.7517	40.4238	<3
12.4442	33.1997	<3
15.9353	3.3063	<3
38.8315	34.9478	<3
13.9879	<3	<3
12.6712	8.2944	<3
19.5828	3.7304	<3
8.14038	3.571	<3
24.0547	6.576	<3
31.1507	5.109	<3
40.5021	64.4377	<3
39.0244	5.3853	<3
55.3135	<3	<3
13.6033	<3	<3
44.892	<3	<3
38.5789	<3	3.3215
23.2696	<3	18.2118
36.6936	5.7185	4.4181
12.9824	<3	<3
19.5531	46.7735	<3
35.5837	8.6291	<3
51.9836	19.7323	<3
37.4331	67.1766	<3
40.181	<3	<3
37.3532	36.3794	<3
18.5297	3.17138	<3
12.0141	<3	<3
27.8815	7.1076	4.5934
20.8503	<3	4.1063
31.8377	4.539	<3
35.0347	<3	3.34976
54.2771	30.7861	<3
57.374	22.823	<3
15.3066	4.401	<3
15.4222	9.4824	<3
36.8338	35.5693	<3
43.1191	<3	<3
14.7823	<3	22.8382
39.9467	3.09	3.577
38.8926	27.8609	21.3512
7.1622	4.6272	<3
13.5288	34.7687	<3
76.0022	11.612	<3
39.5746	4.145	<3
40.0056	64.8741	<3
45.1695	8.015	3.27208
46.1214	33.8109	20.4157
33.477	3.119	35.4519
8.44083	53.1389	46.9217
10.5429	7.4147	<3
40.0614	17.4324	18.8481
10.4601	28.1197	<3
38.6762	5.9789	<3
32.2253	4.2518	25.7549
51.8702	4.85	<3
39.7833	7.8676	3.22383
36.2695	21.2592	<3
12.9385	6.1101	23.1248
6.81188	5.1758	<3
42.1323	<3	<3
36.3709	<3	<3
31.7558	62.044	<3
14.9408	<3	<3
14.6644	33.8348	23.4954
36.4965	13.0412	12.4723
10.1232	6.0775	<3
12.8724	23.2858	14.544
9.0542	17.0222	<3
92.3308	<3	<3
11.5254	<3	29.8174
51.2282	<3	19.6998
40.2733	3.3173	<3
13.0589	<3	<3
45.0636	<3	<3
7.5338	43.5424	16.441
4.1102	76.9264	<3
41.1131	53.151	3.3672
42.2002	8.69599	<3
59.9707	28.7549	<3
46.4569	28.7156	20.2168
38.1776	32.9648	4.4857
28.0413	<3	<3
10.3854	41.3278	<3
47.3343	9.6988	<3
15.7019	4.738	<3
15.1908	3.7961	<3
30.1268	63.9254	<3
53.1898	17.8024	<3
50.6469	<3	<3
13.2734	24.7294	<3
28.497	<3	<3
7.3812	34.8277	28.5088
42.8189	<3	18.599
43.4644	16.8173	<3
53.4121	35.69	<3
63.78	5.46756	<3
41.1122	<3	<3
24.2116	30.0204	<3
43.0659	23.2546	<3
10.3072	21.9353	20.3652
8.0393	3.3423	<3
50.4532	3.874	24.4991
29.0958	8.323	3.6229
12.2228	36.6363	6.01601
38.0393	<3	14.7187
28.3874	5.942	22.5807
10.1478	34.4266	<3
7.43564	<3	<3
6.40962	24.4813	<3
37.3425	3.841	14.6471
15.2256	5.192	20.8575
9.40047	6.482	<3
7.47242	4.256	<3
30.2465	6.149	3.1493
23.1746	5.12	5.2001
41.0062	4.0951	<3
44.2625	27.3648	13.7838
32.1139	5.0262	18.1386
10.5867	3.5198	<3
26.3054	28.4957	<3
27.4507	5.417	<3
5.08215	<3	17.7871
21.8476	3.4903	<3
31.0944	<3	<3
8.48505	4.975	<3
7.66588	26.2953	<3
9.96943	31.3469	<3
9.46716	<3	<3
45.0268	8.325	<3
6.31599	43.045	<3
12.0996	7.0109	<3
31.4547	21.1203	<3
6.36721	18.3166	<3
31.6503	<3	<3
8.0057	32.0109	33.8479
5.30874	4.3998	4.1688
32.586	53.767	<3
34.5557	<3	3.50165
24.2066	6.737	4.54813
11.5376	24.8251	<3
12.8879	26.6465	3.9634
13.5306	32.072	<3
8.63107	4.7232	<3
8.04363	6.2605	3.52621
28.2871	<3	4.6421
40.1746	<3	3.64945
35.3785	<3	3.77236
7.1024	47.5783	4.69855
52.7216	13.6876	22.9218
10.0915	7.87049	<3
11.2662	<3	<3
9.87047	40.5273	<3
32.1554	34.5272	17.7054
7.8431	<3	<3
31.4499	30.7279	3.8786
27.4407	6.43099	<3
3.6906	<3	<3
36.2965	43.1795	<3
24.6431	4.6072	3.3124
12.7901	6.5347	22.1769
8.84171	<3	4.1235
40.2441	98.6577	<3
26.353	5.2638	<3
8.97796	15.6801	<3
7.70546	6.40476	<3
13.5364	38.7589	3.0018
36.0164	13.6522	24.931
7.09408	7.5872	<3
30.633	6.8415	<3
31.873	3.3088	<3
9.68253	4.0362	<3
17.4857	5.6156	<3
11.9492	6.8027	<3
16.3421	5.1115	16.0201
35.1699	25.2243	7.12382
6.6648	74.3269	<3
4.38087	4.1229	23.1292
4.75494	30.4817	4.33896
8.5501	<3	<3
13.4063	3.0283	<3
12.3777	39.6921	<3
12.2336	<3	<3
30.2826	<3	39.9791
26.5499	<3	<3
32.0757	18.498	15.2933
22.5155	79.7078	<3
5.1354	<3	<3
4.7534	6.3123	<3
34.2914	3.9705	<3
8.508	33.8163	<3
6.59015	<3	<3
3.8186	13.8712	<3
5.77493	33.6798	<3
7.55968	3.0319	<3
6.76552	5.2673	<3
35.5057	<3	<3
44.5211	24.9808	<3
32.1313	4.1693	<3
30.1606	<3	<3
39.8017	<3	<3
37.6119	36.3925	<3
35.5882	<3	<3
8.84406	<3	<3
45.6844	<3	<3
53.6075	<3	<3
29.6142	<3	<3
8.5983	4.927	3.00238
29.2237	27.0951	<3
19.095	3.501	4.13059
7.35169	<3	<3
5.07505	78.115	<3
30.913	103.66	<3
8.36136	7.394	24.1965
5.94329	6.9763	<3
32.5409	33.7706	9.92041
35.4246	5.778	3.53352
8.1795	46.231	<3
38.611	24.799	<3
8.89684	3.84149	<3
26.197	4.11521	<3
36.3995	<3	<3
30.9059	41.1069	<3
33.1416	4.2026	<3
26.1864	4.6057	<3
34.1408	47.5196	19.142
37.5665	7.2259	<3
8.28542	<3	28.545
37.3982	6.8112	6.50293
41.119	41.5361	<3
6.47502	<3	14.9099
10.4433	22.307	<3
11.4469	<3	<3
7.35034	6.6917	5.27076
16.561	30.3068	<3
34.5186	33.1001	<3
12.1767	3.9974	<3
54.0461	6.329	<3
5.4699	3.447	<3
51.6919	4.325	<3
13.7602	29.248	3.08582
8.9337	<3	<3
45.6822	5.8184	3.23866
23.3956	7.70849	<3
22.7826	5.1456	<3
30.3267	38.5286	<3
55.1788	5.6986	<3
46.1297	18.3174	3.11367
5.36603	8.6238	<3
3.95572	23.4027	22.4062
10.042	4.3419	<3
51.7921	48.3815	<3
11.8523	<3	<3
7.82273	3.4911	19.7139
6.314	<3	<3
33.6629	45.1201	20.3935
3.441	6.5324	<3
6.62834	4.5517	<3
20.7457	4.5754	<3
20.2684	7.4681	19.1807
34.2292	118.935	<3
27.7113	4.7142	<3
37.1505	6.4852	<3
33.8902	4.8355	<3
44.0911	9.0132	<3
8.33112	7.5153	<3
7.72368	4.08632	3.64282
6.58809	8.55364	<3
12.8946	62.3705	<3
31.2071	31.5456	3.5075
27.6389	13.382	<3
11.4117	7.2903	<3
5.38706	<3	3.63578
6.43447	<3	<3
38.6469	<3	3.79541
6.57689	<3	<3
3.1084	34.7839	22.4429
40.1131	11.3687	23.5319
7.17215	46.5254	<3
36.0738	<3	<3
39.2537	5.1219	<3
7.88993	50.2209	<3
44.0806	38.3984	<3
33.0045	7.44288	3.38229
22.727	6.6952	<3
34.5176	6.8727	<3
27.5598	10.507	<3
54.5002	7.997	3.08815
4.7785	4.11479	<3
10.2615	8.11055	3.27296
28.7526	4.3083	<3
7.24886	<3	<3
32.2473	41.6411	<3
11.2548	6.262	<3
3.8901	57.9998	<3
10.1155	7.12036	<3
8.22382	84.9232	5.24952
4.31135	43.7591	<3
43.5871	<3	<3
43.3322	75.2078	25.4499
9.35411	6.84735	31.994
15.1757	7.7957	<3
8.93437	12.5963	<3
40.8911	7.43126	<3
40.2715	79.0457	<3
33.9804	55.2831	<3
5.94055	94.6938	23.6737
6.5818	3.3364	<3
5.38776	4.7525	<3
8.53895	7.09554	<3
5.84372	6.37827	<3
7.22635	5.5962	<3
27.4612	<3	<3
4.91641	46.0017	<3
4.07995	5.747	<3
5.87956	3.38151	<3
6.10143	7.2353	3.37156
5.98106	<3	<3
34.2204	4.2979	3.00425
32.7906	44.1307	<3
14.228	5.4708	<3
30.9149	45.9044	<3
11.8742	5.2041	<3
17.2089	57.6417	20.4039
32.7188	<3	<3
13.2536	3.5582	<3
8.96135	<3	<3
52.8028	<3	<3
33.4116	<3	<3
31.3341	<3	3.40165
20.4514	3.8506	<3
31.5024	<3	22.0855
38.3522	4.8768	7.21563
42.1099	4.3043	<3
9.2756	<3	<3
35.6838	75.8206	22.1419
43.1425	<3	<3
25.9209	<3	<3
8.95197	<3	<3
36.1329	<3	<3
38.9547	<3	<3
41.6826	<3	<3
6.36199	<3	<3
36.0671	<3	<3
25.6785	<3	4.1059
26.9045	<3	<3
55.0221	<3	<3
38.4156	<3	19.4498
35.9124	<3	<3
29.3737	<3	<3
24.0218	<3	<3
6.14977	<3	20.6716
26.4699	<3	22.3736
25.7763	<3	<3
11.7075	<3	<3
12.0797	<3	<3
45.9273	<3	<3
28.2819	<3	<3
36.384	<3	23.9472
36.6138	<3	25.4386
30.6047	<3	18.2436
42.7572	<3	<3
26.019	<3	<3
13.9291	<3	<3
8.08335	<3	<3
26.5202	<3	<3
9.83455	<3	<3
11.4651	<3	<3
6.60717	<3	<3
9.15818	<3	<3
26.2436	<3	<3
10.6771	<3	<3
37.3206	<3	<3
58.9774	<3	29.5845
29.3951	<3	<3
47.9813	<3	<3
5.82707	<3	23.8029
7.54288	<3	16.3988
41.5364	<3	16.1603
5.57772	<3	<3
4.21154	<3	<3
24.3046	<3	<3
13.3835	<3	<3
24.4101	3.348	<3
10.6142	<3	<3
5.49669	<3	<3
9.04457	<3	<3
7.7533	<3	26.9137
4.64789	<3	<3
6.18214	<3	3.17352
32.4786	<3	<3
8.48082	<3	<3
7.0067	<3	<3
35.6428	<3	<3
7.60529	<3	<3
8.54128	<3	<3
8.38071	<3	<3
6.85825	<3	<3
10.3341	<3	<3
9.32359	<3	<3
7.90164	<3	<3
31.8037	<3	<3
12.5003	<3	<3
5.7405	3.615	<3
10.1871	<3	<3
7.65292	<3	3.24276
7.59771	<3	21.8993
11.3513	<3	<3
8.62179	<3	<3
5.77389	<3	<3
9.83141	<3	<3
10.6603	<3	<3
9.02621	<3	<3
26.1153	<3	<3
6.35046	<3	<3
36.2709	<3	<3
8.74347	<3	<3
10.909	<3	<3
22.4193	<3	<3
9.37875	<3	3.95776
9.14793	<3	<3
8.37021	<3	<3
10.4236	<3	<3
13.1405	<3	<3
10.109	<3	3.94091
40.1971	<3	3.68683
5.13988	<3	<3
9.7218	<3	<3
25.1585	<3	14.5755
8.3948	<3	5.24034
8.92245	<3	<3
11.0262	<3	<3
14.2829	<3	23.0612
10.4445	<3	<3
8.7317	<3	<3
8.51519	<3	<3
6.2715	37.205	23.5585
8.298	3.20802	<3
15.0452	3.17646	<3
27.6695	46.557	<3
32.4034	3.23639	<3
45.7933	6.9632	<3
33.2491	5.1966	<3
15.4289	<3	<3
35.829	<3	<3
11.3342	<3	<3
36.1276	<3	4.08657
44.0199	<3	6.32474
9.96183	14.3247	28.2259
9.56708	<3	3.23052
3.44095	<3	<3
27.2614	25.5159	4.21066
23.4839	26.2902	<3
13.6422	9.3633	<3
9.05866	6.5657	<3
13.8234	25.3945	21.6301
47.3995	<3	<3
11.0244	25.6008	<3
11.7464	32.5916	14.5149
38.5984	62.9321	3.09916
11.3219	35.3565	3.19643
7.41326	38.4129	<3
42.0285	39.2416	<3
13.1778	23.8265	<3
34.4651	3.17119	21.291
6.3992	16.3584	<3
6.29082	32.7732	<3
35.5791	4.51061	<3
24.5118	5.4555	<3
4.4531	26.0604	<3
30.1869	<3	<3
9.99954	3.82529	<3
30.2727	<3	24.9746
7.95869	<3	<3
14.7007	32.838	<3
58.7776	23.2581	<3
32.7557	34.1851	<3
30.9548	29.2481	<3
10.6388	23.7092	18.1428
43.4889	31.3838	<3
30.2557	53.9387	22.0358
23.5448	26.6146	<3
12.1505	7.09129	<3
22.7125	11.0835	16.3694
9.42255	11.8568	<3
15.7952	6.21454	<3
26.9441	14.1209	<3
35.245	30.4265	<3
11.0829	3.0866	<3
38.8836	23.8239	21.7768
6.8421	<3	<3
31.4699	<3	16.2341
44.7975	<3	16.5159
31.5058	4.452	<3
5.0079	<3	29.4814
6.79234	<3	<3
5.1797	3.2567	<3
39.3096	29.5054	<3
6.4735	23.4076	3.13622
6.5993	4.01669	<3
35.1269	23.0721	3.01505
40.5391	<3	22.7273
9.32159	3.57263	<3
47.6917	<3	<3
38.2531	<3	<3
28.4172	<3	<3
27.0847	33.5951	<3
28.108	20.1359	<3
30.6891	<3	<3
4.50677	5.6279	6.9128
13.5593	<3	<3
32.3327	4.5261	3.25622
29.6902	24.8595	<3
22.9472	<3	<3
29.7396	<3	<3
8.2915	4.81493	4.05531
9.61319	<3	<3
32.1106	19.6153	<3
9.12263	41.468	<3
9.16865	<3	<3
17.0027	22.7688	<3
34.9015	6.2905	<3
30.9138	5.3629	<3
56.3551	3.5375	<3
44.5966	43.017	<3
7.32145	29.0513	<3
10.8569	<3	<3
45.9562	48.7703	<3
36.8177	<3	<3
10.6587	63.3679	<3
10.705	41.8768	<3
27.7262	<3	<3
36.3177	<3	<3
9.46056	<3	<3
11.6087	<3	<3
12.8127	4.1262	<3
39.1936	<3	<3
14.0275	44.9983	<3
13.6727	<3	<3
39.1497	<3	<3
14.3405	44.1637	<3
26.389	4.6971	16.4436
35.3362	24.0972	<3
38.7055	5.3585	<3
35.563	<3	<3
45.9367	28.2943	<3
11.2636	32.7872	<3
36.1551	<3	<3
24.7319	<3	22.1916
23.786	32.6853	<3
27.3571	20.6487	<3
14.9746	3.3809	<3
11.6145	42.3741	4.75144
62.5466	42.5698	<3
44.1901	3.8662	<3
21.851	<3	5.37033
45.1837	<3	<3
37.2992	6.4218	3.19284
44.6422	<3	<3
9.11822	7.7195	3.57494
26.7729	<3	28.0635
30.2765	<3	18.7785
25.926	4.5944	<3
41.6409	<3	<3
30.5093	<3	<3
9.2173	10.4108	21.3599
11.3863	35.1168	19.7022
9.88674	18.5305	<3
40.3459	7.539	<3
6.48042	<3	<3
10.0871	<3	<3
10.5127	25.538	<3
33.5655	<3	20.8053
43.7696	5.203	<3
38.8752	38.6737	3.4244
23.9143	<3	16.3381
41.4156	3.9465	<3
51.086	27.8031	22.2749
30.4882	38.0855	3.77338
36.5545	38.3369	<3
27.8623	<3	24.9545
41.6927	26.1859	<3
38.8792	20.5481	<3
27.9446	18.3596	<3
31.4496	<3	<3
37.1766	30.4179	4.0746
26.2934	<3	<3
37.4857	<3	<3
32.2508	16.9973	<3
23.304	57.0621	27.2076
8.6127	3.9251	<3
24.4684	23.6836	<3
36.273	21.2551	<3
8.87422	4.09835	<3
6.64824	5.9945	<3
9.19761	5.14598	27.3081
8.00894	30.4569	<3
10.7163	3.9903	<3
36.3368	3.72867	6.80231
23.9525	36.1548	16.775
12.2412	<3	<3
41.8349	22.5062	<3
42.3484	21.8901	<3
8.97818	26.426	4.31378
6.07997	<3	4.54201
48.4775	3.6963	<3
31.8215	33.0117	<3
12.8887	21.8288	<3
10.6501	46.4814	<3
14.8188	<3	<3
12.8509	60.6291	<3
32.6024	30.6167	<3
45.4486	42.4218	<3
12.3987	<3	32.8152
5.8441	3.2321	3.01929
10.4899	35.6419	<3
54.1016	21.6101	<3
9.2166	34.1956	5.52393
40.1062	24.1012	<3
35.3979	33.178	<3
28.6302	4.6502	<3
32.2499	6.4277	<3
3.2324	42.2055	<3
25.7962	<3	<3
5.8006	<3	<3
12.9696	<3	20.6336
12.8092	23.8897	<3
9.6981	31.4957	<3
21.9265	5.2397	<3
26.6635	<3	<3
21.9028	20.9277	<3
10.0663	14.9378	<3
24.0848	3.0119	<3
14.3537	<3	<3
23.8167	22.713	<3
29.8045	4.3666	<3
9.178	28.6121	<3
29.1602	47.8208	<3
11.2735	25.3371	<3
8.1145	25.1205	4.31329
12.0489	22.2964	<3
35.3577	19.6066	<3
8.4983	31.7586	<3
4.3112	30.8084	<3
4.3688	41.2248	3.41743
9.5388	3.5597	<3
35.9651	3.9334	<3
6.5163	20.6773	<3
10.8626	25.7744	23.5362
3.21655	25.3941	3.38392
27.9537	18.2298	<3
14.179	22.6874	<3
12.3858	10.9806	16.3111
7.0403	28.8512	<3
39.3529	7.3439	5.55777
24.1147	22.8987	3.1771
35.3353	35.715	6.3607
9.72361	5.1407	<3
10.483	5.6594	<3
8.70785	<3	20.5715
11.7021	26.0728	<3
8.02206	27.7073	<3
18.2696	30.8838	<3
12.8007	18.4695	<3
12.6904	33.6929	<3
13.7307	13.1143	<3
9.58124	23.6653	20.8331
10.5101	36.4997	<3
8.8148	9.4294	8.15629
10.7902	18.9612	17.4436
42.5207	18.1569	24.4257
11.9368	31.9194	<3
11.818	28.836	<3
12.7371	11.6339	<3
8.7472	33.4902	<3
50.7329	<3	<3
12.3706	<3	<3
30.6979	<3	<3
26.1576	<3	<3
34.8688	27.6018	<3
6.08729	28.0986	<3
10.2165	27.4373	<3
32.6317	18.0335	19.8006
9.47533	25.6824	<3
9.58125	18.7246	<3
10.0258	25.391	3.6301
9.70614	34.812	<3
35.4257	21.74	<3
8.0512	4.7681	3.25751
8.14157	19.3358	3.32789
45.3805	24.3069	<3
13.3874	22.6099	<3
35.6895	23.2114	<3
61.8102	25.1763	3.5953
30.9375	<3	3.12113
35.685	29.3828	5.0733
22.397	<3	<3
44.7226	30.3847	<3
34.4452	4.3997	<3
40.5592	27.4276	24.0304
30.3295	35.9198	21.2541
50.3204	36.6298	<3
43.7978	26.6908	4.13123
34.7613	<3	<3
4.73391	3.4541	4.17735
7.06367	<3	6.58216
40.6625	22.5369	24.5874
31.9987	18.7163	16.2071
36.1358	21.0651	<3
38.3814	3.2567	6.83945
33.4048	25.5449	5.72831
6.45963	12.4613	<3
37.4856	28.9179	<3
45.4683	19.0365	5.63164
40.2383	13.8124	3.15535
41.7887	13.9778	14.3488
30.3504	3.1614	17.7255
59.4322	29.9359	23.0555
11.0693	<3	<3
3.66613	<3	23.6328
6.98226	<3	<3
7.59898	33.5003	<3
8.617	29.3392	17.4462
42.3429	27.9294	<3
9.05661	<3	<3
23.5368	30.3382	<3
10.4977	<3	<3
33.1029	34.9852	<3
42.0402	<3	<3
9.10415	41.1809	<3
8.73686	3.2107	<3
31.7955	25.0124	<3
10.723	18.1088	4.5324
26.1525	<3	<3
42.9489	<3	3.11054
41.4587	<3	4.0138
12.5384	4.1016	19.7484
11.5204	27.265	4.8435
29.3799	<3	3.7563
36.4167	50.4691	5.0061
3.86998	39.0532	6.6911
7.11072	3.912	<3
27.472	3.1407	30.0589
5.9151	22.2864	<3
9.1975	17.9687	<3
25.5941	38.9997	<3
10.9577	<3	4.911
32.3437	35.6035	<3
6.52193	9.0348	9.5301
30.7397	5.7102	4.07113
29.3582	3.2934	31.042
11.48	<3	<3
38.7526	26.2769	<3
31.0646	3.5521	<3
28.8043	24.6325	<3
10.7188	24.4014	<3
7.8178	34.873	3.8964
8.63458	3.0039	<3
45.5786	3.2339	<3
27.8587	42.1242	<3
37.2799	<3	21.999
25.0287	3.3013	24.1687
40.9507	42.5358	24.5684
9.1624	3.7867	<3
8.28392	25.3297	19.6616
45.286	<3	17.8532
39.2988	34.2063	3.02533
43.3852	20.842	<3
28.3126	<3	<3
12.8307	25.2945	<3
53.3336	<3	<3
37.2306	27.9609	<3
4.9931	<3	3.55869
11.1622	<3	<3
38.5382	5.55595	20.0097
31.6045	30.0978	<3
31.8269	<3	<3
33.8903	3.8265	<3
27.3655	4.0993	<3
35.0467	<3	<3
48.5487	3.2783	<3
9.95934	<3	23.6981
10.8078	<3	30.5929
51.2621	<3	19.4258
7.855	<3	<3
36.4517	3.472	<3
25.0225	33.2674	3.0635
43.0725	<3	3.03414
26.7523	<3	<3
39.2569	<3	16.2982
10.7412	19.9644	<3
5.14508	27.4062	<3
42.873	4.8373	<3
10.002	3.32286	<3
7.5066	<3	<3
12.6245	3.5969	<3
28.5164	51.1988	<3
40.9621	3.0619	<3
20.6881	<3	14.0995
24.1082	26.9543	<3
13.9675	22.5078	3.26935
44.0811	<3	24.7237
83.7092	6.83739	<3
10.3745	27.1113	21.1068
8.45953	30.6713	17.9741
12.8887	<3	<3
8.56959	<3	3.25659
27.4384	<3	<3
45.7444	23.1636	24.8185
4.5826	4.2411	<3
37.6564	32.6914	<3
29.4126	3.6111	<3
25.7023	27.326	25.7739
5.95393	24.3525	24.1422
5.44539	<3	<3
40.6174	33.3308	<3
33.2603	<3	<3
39.4455	29.7965	<3
54.2826	<3	<3
26.6255	<3	<3
26.2226	<3	<3
25.4801	38.557	<3
13.0022	<3	<3
8.6569	39.446	21.7841
30.713	3.13797	<3
9.1352	3.9962	<3
46.5215	40.6338	<3
9.8082	27.421	17.7712
9.76	37.3286	23.3431
26.5148	40.5951	<3
41.4392	27.6294	<3
4.22888	<3	<3
39.0132	52.6803	<3
35.9604	42.2603	<3
17.1095	<3	<3
25.5416	<3	<3
41.0744	21.7501	22.0594
28.9859	21.7802	<3
28.4563	3.8517	34.1245
26.0966	3.9397	<3
5.74179	35.2147	3.68346
4.01455	4.9079	<3
6.8093	5.8073	<3
44.7416	31.7321	<3
24.3296	28.5164	<3
35.7252	<3	<3
30.8084	39.9192	<3
10.8369	3.3983	3.73189
29.9976	29.8352	<3
9.19718	<3	<3
7.46017	34.1008	3.04728
34.0785	3.9249	<3
10.1941	<3	3.50954
23.902	25.1112	<3
35.0122	7.28557	<3
7.66571	4.57818	<3
7.19519	6.37896	<3
28.7927	28.4569	3.64457
22.6007	5.92935	19.5809
23.1469	5.32015	<3
40.1302	<3	<3
11.5624	19.0004	<3
10.831	<3	<3
23.9109	41.8837	<3
27.6107	8.5607	<3
6.14865	<3	<3
26.7918	4.131	<3
26.1467	<3	<3
15.4312	3.941	27.1064
42.1425	27.9404	15.8915
38.5577	<3	<3
12.6571	12.164	<3
31.9421	32.179	<3
12.7407	28.9676	3.6334
31.2776	<3	<3
16.2914	<3	23.5248
9.3231	<3	<3
8.11995	<3	28.1114
22.4008	<3	<3
36.5758	30.7082	<3
8.8491	<3	<3
30.3374	<3	<3
38.1725	33.7299	<3
9.9307	<3	6.54367
8.8052	3.0018	<3
29.3982	<3	<3
18.8482	<3	<3
4.897	3.3388	<3
8.6163	<3	3.095
7.1331	26.7161	<3
10.5162	<3	<3
4.646	<3	<3
29.1442	<3	<3
25.3705	<3	<3
3.5884	31.5464	<3
38.4494	4.7502	<3
32.3408	5.4155	<3
34.4505	<3	5.70025
8.41254	7.4932	<3
5.92473	35.8956	27.5701
3.24321	4.9762	3.808
4.16032	<3	4.3977
5.45196	<3	<3
11.6751	29.7101	<3
9.84681	<3	<3
6.04115	<3	<3
6.19977	3.9141	19.5028
16.6067	3.06657	<3
9.14833	<3	<3
9.83657	<3	<3
44.2708	<3	15.9625
27.2893	<3	<3
21.7081	<3	<3
8.78233	<3	<3
5.5443	<3	<3
10.6904	54.9778	<3
42.001	9.23407	<3
28.7605	5.45587	<3
46.2408	<3	<3
8.75959	3.9803	<3
10.0176	<3	<3
7.98479	7.53046	<3
25.4078	25.6946	<3
24.6944	<3	<3
26.3696	<3	<3
28.9138	4.4212	30.7424
40.1977	25.0152	<3
28.9425	<3	<3
6.03688	<3	<3
8.42815	23.2377	4.76267
32.0436	<3	16.7594
39.6473	<3	<3
10.3843	<3	19.9634
9.6178	3.8793	12.1841
32.7956	<3	4.0228
28.8881	<3	<3
7.60212	<3	<3
23.9998	<3	19.8007
9.01822	<3	<3
8.9524	<3	4.87541
30.9798	<3	<3
12.8943	24.886	23.7331
28.2353	28.886	<3
9.6444	<3	18.5293
9.54986	20.2556	32.5806
26.9405	21.5264	<3
29.1117	<3	22.9023
3.42355	29.6091	23.6852
5.6343	21.8287	<3
25.2206	29.4077	<3
32.0245	4.3611	4.18597
7.89148	23.165	3.74306
4.561	<3	22.4392
34.4885	<3	<3
11.7642	<3	<3
24.8376	18.7056	23.8559
33.7734	27.8854	<3
6.24771	<3	<3
5.35549	<3	25.0449
38.0749	27.4144	<3
27.3622	3.46786	<3
10.4162	10.1515	<3
27.1507	6.62335	<3
5.81567	<3	<3
12.4843	3.7474	<3
31.2045	<3	30.4588
7.74443	<3	<3
4.457	<3	24.7772
32.5002	3.4151	<3
27.7759	8.5403	<3
9.36933	23.7674	<3
25.5663	3.5744	<3
8.03597	<3	<3
6.37629	<3	<3
31.5934	<3	<3
33.4866	5.8106	<3
27.4313	<3	<3
10.5683	<3	<3
8.69893	<3	<3
24.4713	<3	<3
7.95017	9.4345	<3
8.40356	3.3605	25.3202
21.5687	<3	<3
32.0832	<3	<3
5.21152	<3	27.3843
9.34178	27.9186	29.6329
10.1484	<3	<3
22.3944	<3	<3
43.1507	<3	<3
31.0397	5.3833	<3
12.3956	<3	<3
21.8271	3.47898	<3
5.46906	4.30237	4.0467
6.05295	4.24728	<3
4.48049	<3	5.14294
<3	<3	<3
4.13285	<3	<3
28.0969	<3	<3
10.3416	<3	<3
30.1257	<3	<3
32.0495	25.2904	<3
23.0303	<3	20.6712
10.1862	<3	6.92526
42.1706	<3	<3
7.9619	<3	<3
33.8271	<3	3.89215
12.6913	<3	25.3152
24.3574	<3	<3
9.20303	4.5083	<3
9.4937	26.2671	3.77969
4.794	<3	6.89224
8.86566	<3	<3
24.1573	<3	<3
22.7546	<3	<3
31.4965	<3	<3
19.6095	<3	<3
36.9848	31.8434	27.6511
8.076	<3	<3
17.5767	<3	<3
6.83871	<3	3.9375
5.64884	<3	<3
40.5057	<3	<3
9.70021	3.8156	<3
29.678	<3	5.85796
32.1515	27.7914	3.2291
11.0254	3.9929	<3
42.75	3.8643	<3
24.5405	3.3829	40.1202
40.752	<3	3.1354
6.32864	6.5035	3.8514
6.98191	35.2876	<3
5.33077	<3	3.1631
14.1574	<3	4.662
30.621	<3	<3
32.2638	<3	<3
8.09198	<3	<3
9.57502	<3	<3
38.0881	<3	<3
12.5474	<3	3.21489
26.7012	<3	4.90436
8.71394	<3	<3
10.9714	25.2205	<3
8.4016	<3	<3
31.9055	<3	<3
8.21364	5.1598	<3
10.3487	3.3819	<3
7.72198	<3	<3
39.3264	4.4128	<3
9.41542	20.1851	<3
32.9435	<3	21.5646
11.0888	<3	<3
9.02776	<3	<3
21.185	34.0398	<3
6.53927	3.0765	<3
6.82509	<3	4.8783
5.53167	<3	3.7493
6.77853	34.7876	3.53186
34.7064	<3	4.35781
8.40904	23.9811	4.4438
8.90949	<3	3.9032
32.2623	<3	<3
7.26563	<3	<3
9.52417	4.68161	<3
27.8489	4.95392	<3
5.45123	7.7709	3.485
31.3001	<3	3.09846
27.8822	4.5093	<3
12.5923	<3	4.6974
6.56612	25.6688	<3
6.65877	27.7195	<3
19.0319	34.9103	<3
7.13502	<3	<3
38.2212	21.5185	5.1445
30.6148	28.3272	3.6232
22.792	<3	31.1432
24.6806	<3	<3
6.88913	<3	<3
7.94012	<3	<3
7.14213	<3	<3
41.4201	<3	<3
8.21433	7.0101	<3
6.29223	3.3351	<3
5.70324	<3	<3
11.155	13.9209	<3
7.54751	36.0041	<3
31.884	4.29967	<3
<3	30.6648	<3
23.075	28.1963	4.90512
40.4662	33.4932	<3
8.27048	4.85172	<3
29.8601	33.6393	<3
6.2922	3.8358	<3
5.89405	3.0816	31.3528
4.62688	<3	<3
45.2218	27.9154	<3
10.2633	25.1411	<3
30.9455	6.6885	5.13043
36.4488	<3	28.9078
12.099	<3	5.5314
10.1065	3.9141	25.2591
13.7597	<3	<3
21.0464	<3	<3
7.13266	<3	<3
26.8377	<3	<3
5.6087	18.9206	<3
24.2629	31.7731	<3
6.78933	<3	<3
25.788	8.9558	<3
8.07637	11.7739	<3
7.9025	<3	<3
31.3329	<3	<3
4.02406	<3	<3
5.68637	<3	4.10354
43.5953	4.9601	<3
5.24106	<3	21.9764
10.7663	5.0317	4.3801
16.4537	<3	6.241
11.7487	22.5022	31.7115
25.1308	25.9796	<3
10.1803	<3	<3
25.3285	<3	<3
8.23426	<3	11.2613
4.71545	<3	4.6347
25.1137	3.444	5.14255
8.18608	<3	<3
31.6818	48.9381	8.7474
7.33874	<3	4.7573
9.84086	24.6109	5.03026
5.67455	3.4751	21.736
6.06603	3.8682	3.6018
33.6206	<3	<3
34.5053	<3	32.5537
8.94349	<3	<3
25.9719	27.1087	3.4651
29.9615	4.3407	<3
4.6539	<3	<3
32.2991	3.5354	<3
21.7609	38.0051	26.1252
10.6605	<3	<3
34.7946	<3	<3
3.80638	30.5315	24.6845
27.374	25.1102	3.39071
8.04504	4.1813	6.5951
34.0872	4.8305	4.9916
31.3134	10.6584	5.1045
8.56355	4.1624	<3
29.0669	<3	<3
32.7419	31.9036	<3
9.7929	<3	<3
29.3184	<3	<3
6.75571	4.4497	<3
9.94559	19.808	<3
6.52423	<3	16.5387
16.8607	<3	26.282
7.97704	<3	<3
11.648	7.0886	<3
9.22661	19.7976	<3
7.67372	<3	<3
34.4317	27.1612	<3
43.0215	34.5272	<3
7.2444	<3	<3
47.5001	<3	<3
4.49744	3.8841	<3
<3	<3	24.0286
34.7435	<3	<3
37.0718	<3	23.6153
<3	42.7889	<3
4.57061	5.1093	<3
20.5502	<3	<3
40.2392	4.6307	<3
5.97453	3.3123	3.82956
8.34855	3.267	<3
12.0832	<3	<3
5.99184	4.134	<3
<3	3.2098	<3
28.2128	3.4626	3.36146
28.5623	5.0669	<3
21.2243	<3	35.603
16.6043	30.1976	13.7275
36.6394	<3	4.067
7.27617	3.0948	4.3996
20.2718	<3	<3
30.0311	<3	<3
5.30913	<3	<3
7.3326	3.4309	5.65602
3.81674	<3	3.7692
8.70815	16.3077	<3
5.5881	27.7848	<3
8.80992	<3	22.1091
29.0005	<3	19.2241
3.174	<3	19.6955
4.02634	25.339	6.00147
3.73426	4.2534	22.217
28.8902	<3	<3
3.41824	<3	<3
5.85145	27.0599	<3
4.13814	<3	<3
5.24919	<3	<3
3.92239	<3	<3
30.4492	<3	<3
53.4999	<3	<3
8.2774	<3	26.4438
49.6392	<3	<3
4.57913	<3	<3
41.1465	<3	21.4202
9.79997	<3	<3
41.5043	<3	4.55882
7.66625	35.3255	<3
40.2901	<3	3.97007
7.39247	<3	6.3709
4.77946	<3	3.81057
8.98231	<3	3.091
3.19485	24.8488	<3
5.39917	31.9942	4.85614
<3	<3	25.3137
24.0448	<3	<3
4.03257	5.0607	23.7916
8.00739	4.3509	<3
33.2152	23.4804	<3
9.29916	46.7404	<3
30.4807	<3	<3
6.06955	<3	<3
3.80743	22.7361	<3
7.8151	<3	<3
8.28261	<3	<3
5.19348	43.9254	<3
<3	24.0511	<3
26.1385	<3	<3
5.60435	<3	23.6084
6.95589	11.2701	24.5698
<3	<3	<3
5.24348	<3	3.31365
6.35361	<3	<3
23.6054	52.0354	<3
32.7918	5.83048	<3
26.1196	22.658	<3
50.8924	24.4074	<3
23.0117	<3	<3
8.31079	<3	24.0709
36.3914	52.9875	32.2616
22.7961	36.0896	9.07503
32.1581	<3	<3
13.2637	29.1944	12.7675
7.29318	29.7215	<3
6.42384	3.9197	25.3656
34.5219	21.2786	<3
28.5926	<3	16.8011
9.25344	<3	<3
24.9533	<3	<3
28.8336	34.9561	<3
3.81401	<3	<3
8.30474	<3	3.24835
34.0262	<3	7.55977
28.2167	<3	<3
5.99364	<3	<3
4.59693	<3	<3
35.5142	<3	<3
4.37615	<3	<3
31.4225	<3	<3
6.32139	<3	<3
4.15867	<3	<3
5.1702	22.9157	<3
6.8665	<3	34.7968
6.8976	<3	3.14947
9.56111	25.6514	4.56328
27.2854	<3	25.508
5.14042	34.4917	3.11548
42.1648	<3	<3
32.371	<3	<3
8.39109	5.1555	<3
4.43397	<3	<3
25.1814	<3	5.84394
29.0877	30.8764	5.1082
<3	<3	5.28378
8.20904	22.6445	<3
5.92736	<3	3.40832
32.7091	5.51104	4.8003
25.6318	4.59162	<3
7.59025	4.05835	3.3312
6.55895	<3	<3
41.3338	<3	7.9763
8.2568	<3	8.93034
38.3274	3.21635	<3
<3	<3	<3
7.04028	<3	<3
7.12571	<3	4.7933
5.44914	39.3677	<3
41.6354	<3	25.5368
44.7175	28.9715	<3
5.86612	23.9857	<3
5.67943	28.4849	22.6597
7.13045	3.78547	<3
5.4342	<3	<3
8.23303	4.9323	<3
23.9522	31.2493	<3
24.0454	29.025	3.60326
4.2446	29.9661	<3
6.15944	4.387	<3
5.56511	50.5499	<3
6.6465	10.2172	<3
10.3765	3.738	3.8067
3.55003	42.2957	3.47044
4.87068	3.67744	5.2648
4.92406	20.0464	3.86639
9.91778	5.47855	<3
7.60597	39.3045	24.5086
7.46085	<3	<3
6.948	<3	<3
7.63076	<3	<3
36.3934	<3	<3
26.7648	<3	4.30285
38.068	<3	<3
44.2445	<3	<3
18.0478	23.7924	<3
3.96154	31.2044	<3
<3	17.9393	<3
4.4947	<3	<3
4.22892	25.172	<3
34.6824	<3	<3
5.05676	3.1563	4.0107
37.4676	<3	5.1032
4.96096	<3	<3
7.74168	12.7077	18.2771
11.5023	<3	<3
6.26367	<3	<3
7.07887	<3	3.59719
5.41501	<3	<3
40.7935	3.63015	26.7747
35.3274	<3	<3
34.0374	<3	6.79038
32.1323	34.5855	<3
5.05913	14.7228	<3
10.3332	<3	4.018
5.40558	3.068	<3
45.6861	27.9733	<3
9.21	<3	21.7671
5.24627	3.18471	<3
29.1665	<3	<3
29.5951	40.4712	<3
33.966	39.5261	<3
46.7878	21.8039	3.61372
34.0108	5.01297	<3
24.5555	<3	<3
27.5562	<3	<3
40.1321	<3	6.42797
33.299	<3	<3
3.4162	4.12183	3.79477
25.3221	<3	<3
32.3848	16.0948	18.5228
34.4801	<3	<3
6.06036	38.7147	<3
7.91346	4.55515	4.0895
24.888	<3	3.10972
9.71341	44.5606	<3
25.7528	<3	3.16876
6.31688	5.93038	<3
36.119	5.21721	<3
6.79614	4.94198	<3
53.9659	3.79857	<3
7.3171	<3	<3
8.5986	42.6962	<3
40.1964	<3	<3
5.3436	<3	<3
12.4471	4.2494	<3
46.452	<3	<3
4.0725	<3	<3
<3	<3	3.73849
4.84185	<3	3.88872
4.51395	40.8233	4.82164
47.3261	<3	<3
41.5585	<3	<3
7.50331	<3	3.17882
21.197	<3	3.32076
12.0411	<3	<3
9.30049	<3	<3
35.8525	<3	7.0286
6.50208	<3	3.79047
23.9435	33.2234	<3
27.4114	<3	3.76787
8.29674	<3	32.2998
32.6918	<3	3.46896
3.23221	<3	4.42223
<3	<3	22.4313
8.0139	<3	<3
36.3648	<3	<3
4.61053	<3	<3
7.329	3.6321	<3
7.52574	4.4199	<3
38.9266	29.1265	<3
5.73456	<3	<3
29.5337	39.243	<3
9.69409	45.6121	<3
25.5268	3.4505	<3
32.5418	<3	<3
8.33429	<3	<3
5.30348	4.0181	<3
22.8665	<3	<3
20.8818	<3	<3
37.0606	27.3359	5.67608
5.22176	27.4434	<3
6.47033	3.2053	<3
8.22048	29.9756	<3
22.1833	19.9683	<3
30.9472	23.9039	<3
8.32855	<3	<3
3.84907	20.2621	<3
9.59299	<3	<3
6.51766	<3	3.3458
40.9932	<3	<3
7.95195	<3	<3
37.6822	<3	26.6805
7.20339	32.123	<3
8.71805	34.1046	<3
31.3936	<3	<3
6.33552	<3	3.8867
27.6832	<3	5.8112
11.6067	<3	<3
8.89016	<3	<3
7.13026	<3	<3
8.92258	<3	<3
12.6477	36.6737	<3
8.21818	<3	21.7313
8.51755	<3	4.63455
8.56481	34.6472	3.15702
11.0759	<3	<3
39.0628	<3	3.5702
28.6056	<3	6.4747
23.4027	29.3401	<3
7.31437	<3	<3
42.9133	<3	4.3421
6.99286	<3	<3
32.184	23.7499	<3
8.39642	<3	<3
17.623	<3	<3
7.37034	<3	<3
7.55235	8.47585	<3
23.1943	5.6418	<3
7.3307	3.3389	<3
57.1052	<3	<3
33.3868	23.3774	<3
<3	3.8769	<3
3.59661	<3	<3
7.80385	5.013	<3
32.0904	<3	<3
8.97517	24.9561	<3
5.32042	<3	<3
5.01	31.9751	<3
36.4541	15.2065	<3
26.9049	30.201	17.0581
36.2154	30.9135	3.8857
9.46915	<3	4.44191
57.8302	<3	<3
9.51483	<3	4.29459
7.54333	35.149	3.56488
6.02485	<3	<3
7.15638	<3	<3
8.56387	<3	<3
8.15889	7.99186	23.0318
4.91806	51.4012	<3
31.5626	35.3272	<3
4.73137	22.9235	4.81153
15.8429	4.63901	4.349
25.6311	5.11873	24.1144
9.2379	48.1879	<3
29.0427	29.2411	<3
9.94034	23.181	<3
6.84221	50.3828	<3
5.41358	6.3208	<3
10.6813	22.1606	<3
8.91879	47.4357	<3
27.864	19.4621	5.6785
7.62373	54.8135	5.47765
37.0685	5.2723	<3
63.1801	39.4324	<3
29.6118	40.6655	<3
51.5701	<3	3.5722
65.4411	51.722	<3
131.036	30.844	<3
154.101	58.807	<3
54.9517	3.83031	<3
91.7011	7.45208	5.21377
61.3078	41.483	3.83721
104.156	41.3851	21.1424
72.5696	6.5471	3.42066
56.3394	33.3957	<3
37.3081	4.93594	22.6768
5.01518	5.07303	<3
8.70404	46.754	<3
26.0225	37.7324	3.5314
8.56457	5.06992	3.99991
4.44733	7.8111	3.82202
32.518	6.19371	24.5172
9.43525	5.64757	29.0538
9.94587	9.90928	<3
9.2305	30.9571	26.7723
8.42453	8.55727	3.17741
9.08917	6.0624	3.11283
30.8082	36.5572	3.32606
10.8582	3.4259	6.7597
5.91986	38.3733	<3
25.7566	30.7397	<3
3.15996	6.5794	<3
6.20725	5.0695	<3
4.09495	8.53564	24.1294
8.8133	46.7794	36.11
27.4774	29.6209	3.45319
9.04212	32.1427	<3
<3	7.5516	6.157
26.9681	8.86568	3.19396
4.37775	7.12607	5.11011
59.6151	31.1379	6.94193
34.3736	3.2745	4.37307
27.9177	3.6265	5.70891
4.25075	27.928	<3
4.72661	<3	5.22617
<3	<3	6.37247
4.11771	29.8316	4.26607
4.55003	26.4437	<3
6.96539	10.2911	5.75924
25.242	9.657	23.4713
38.6318	8.2934	<3
26.602	34.4373	25.6314
11.6257	33.5594	5.18239
9.08454	40.1622	16.7114
6.15495	6.54739	<3
8.49021	40.4404	<3
27.2731	31.5388	20.5609
6.10612	44.8781	<3
7.81337	33.0297	<3
12.8302	4.68141	<3
75.2208	31.6995	3.1439
5.63087	9.2884	<3
10.6018	8.6451	<3
35.0002	4.4219	3.10038
10.6077	39.6363	<3
4.0022	27.4061	<3
35.7141	<3	3.1608
18.2695	<3	<3
8.69759	<3	<3
41.3382	35.2544	<3
3.1809	33.472	<3
44.8275	31.4119	4.07848
47.8267	7.6645	<3
46.0607	35.5776	<3
47.0499	3.5494	5.1022
6.21438	49.7086	<3
59.2849	9.51031	<3
38.5537	50.9872	<3
35.1313	44.8002	<3
7.4757	41.4484	<3
39.7081	4.17081	6.0005
52.872	60.8635	3.51649
7.5677	42.4402	<3
4.68422	15.2108	<3
34.5791	21.3679	23.2706
7.185	37.9374	6.35404
5.06102	9.3676	4.17279
7.0646	39.6544	6.51616
30.8146	5.775	5.44563
6.07721	3.5282	4.99742
6.58665	7.0952	<3
9.11693	38.5847	21.7702
8.6921	37.102	<3
7.84072	9.2405	<3
6.85154	6.286	<3
29.613	27.1363	3.47722
7.72385	3.7854	3.39821
36.9703	31.4181	13.8793
26.6366	5.43379	24.9446
8.1177	23.4905	<3
7.77776	6.0842	<3
4.11265	41.3132	<3
6.93922	4.6424	<3
3.84248	3.0915	<3
8.48335	34.9278	<3
6.0447	4.0233	<3
31.1207	8.7966	<3
30.3801	5.9663	<3
4.05574	5.2538	<3
3.79288	30.3329	<3
5.5669	33.2828	3.28761
7.95522	<3	21.3487
7.68865	4.2534	4.24993
4.64337	37.0572	<3
7.81334	5.5418	5.76146
4.36261	38.8069	5.62445
24.4076	4.9601	13.3295
7.83231	4.171	17.5454
7.22405	5.3195	<3
5.80597	28.9912	<3
31.5098	35.987	24.8155
10.251	21.4011	4.52456
9.57094	4.3842	<3
8.30394	24.4077	26.7894
6.59322	47.0437	26.4734
6.15471	25.9619	27.4516
7.0141	3.3537	24.1794
39.5939	3.9678	5.42508
25.4557	5.6371	<3
3.5589	3.9647	5.80493
23.8244	5.7063	4.66695
12.6665	45.6938	24.9548
9.07384	3.1447	3.26674
7.9541	7.61421	6.4454
40.6021	4.58543	7.4314
14.2857	13.4205	5.0612
35.3175	29.8743	9.17251
80.5607	3.8768	17.8349
41.6272	27.7173	<3
104.659	46.0238	27.0844
114.41	7.7746	<3
48.0805	10.5628	5.56522
87.1374	27.1112	<3
9.0955	23.0772	<3
6.96565	26.1802	25.948
20.952	30.3273	26.6824
9.5535	4.3975	<3
7.56779	30.2401	<3
10.2938	<3	4.87361
37.2129	34.6292	21.3984
7.4153	4.3539	<3
8.85902	4.8105	3.27649
<3	27.4995	22.9799
4.69325	4.9253	3.58487
3.2427	3.0841	<3
5.8308	25.2491	4.76558
29.145	3.6671	4.2717
7.40788	5.5752	<3
8.11136	4.5402	3.27649
9.04563	46.4969	18.7043
27.1881	20.776	<3
5.61121	7.56502	<3
6.86126	6.7564	<3
9.4308	26.042	<3
30.9826	3.50408	18.856
30.3895	<3	<3
7.13238	5.5863	3.7632
34.5104	19.7545	22.6529
12.2933	5.72154	<3
6.75006	35.499	<3
38.5236	<3	<3
43.8802	5.0358	<3
30.8444	5.1665	<3
31.0917	10.0417	40.9189
8.82797	4.0528	4.11555
8.46845	22.1914	26.4693
27.6585	6.36277	<3
4.36454	6.04998	<3
30.6121	7.6337	<3
7.61747	<3	3.29789
7.18105	25.1478	3.12362
43.4847	7.79534	10.9916
37.2697	5.3045	<3
28.4319	13.0395	<3
36.1216	24.5579	<3
7.91746	4.41214	<3
9.42025	3.2478	<3
29.3771	8.75587	4.7561
5.29692	24.2878	<3
9.38364	4.1085	<3
10.2733	35.0695	46.4848
7.38349	32.3518	<3
27.2483	3.11	<3
52.5535	5.6054	26.3159
5.3497	5.3553	3.44405
40.3367	3.93857	33.0247
38.8585	3.3523	3.341
8.44055	<3	5.3359
6.86414	7.26119	3.1202
58.218	39.4975	5.1829
41.0663	<3	<3
66.618	6.2073	23.0645
32.5157	35.6807	<3
28.143	3.2864	<3
38.5487	38.4075	<3
5.2748	5.80688	13.7701
9.95679	4.87103	<3
23.5873	7.7435	37.8851
25.7453	5.1841	<3
11.2679	6.2979	4.8667
7.07409	6.72322	<3
9.0899	5.9986	4.0514
<3	7.9603	22.2404
4.52333	5.4245	<3
11.5646	26.3244	<3
7.49081	5.3922	3.0638
6.349	<3	<3
4.93863	4.4944	5.0639
11.2265	6.0965	<3
7.33773	4.75865	<3
8.44238	<3	<3
28.4526	4.8575	18.4495
5.74352	<3	<3
29.2258	4.48997	<3
6.39381	4.44389	<3
4.52993	4.26989	<3
9.91719	6.3731	<3
23.5117	<3	42.791
4.47114	<3	20.2054
4.15207	3.1962	18.7817
8.5991	<3	<3
4.45072	9.64511	<3
7.3436	25.0967	3.69332
5.53894	37.5961	21.7139
4.55383	7.7779	4.49157
23.6499	30.8443	6.2498
8.05276	5.5361	<3
7.41899	7.6211	<3
23.989	6.8083	<3
5.6196	9.2529	25.4312
5.7777	10.6959	23.69
5.86507	7.0834	<3
8.5168	5.8789	<3
7.0084	5.3688	26.9464
4.62325	6.622	23.3602
4.85955	7.3084	<3
5.18857	5.3855	<3
69.5653	7.9051	21.5092
3.0569	5.3533	<3
23.8346	7.0563	<3
7.83353	6.5044	21.3946
10.3655	4.2627	16.4098
34.9588	8.9406	16.6597
5.6617	5.9022	<3
7.21324	7.2319	<3
8.73551	6.1752	<3
3.94306	9.1395	<3
4.41153	8.221	<3
29.7638	5.4519	<3
4.70837	5.9298	27.975
3.96871	4.4212	<3
7.20744	3.5139	<3
5.29461	6.665	<3
8.19809	5.1011	<3
35.9935	7.0823	<3
8.90236	5.534	<3
5.99069	6.4237	<3
6.56385	4.3732	<3
4.92051	4.0116	<3
3.99259	5.5196	<3
31.7598	7.3446	31.8459
3.6054	3.4764	<3
8.24264	6.3153	<3
<3	6.9344	<3
5.4428	5.4668	28.2664
6.96263	6.0709	19.1791
4.17052	5.2385	<3
6.3773	4.7479	<3
7.33687	6.083	3.35497
46.0973	7.0534	32.1169
4.87799	7.0467	3.76543
35.6766	4.1528	38.2224
3.3318	6.5531	<3
25.1267	5.3985	<3
5.32565	7.8526	<3
36.4883	8.167	<3
10.3991	5.1388	<3
10.0876	3.8775	6.75739
8.87089	10.4044	<3
7.87724	4.9885	<3
5.22318	6.3453	<3
7.80781	5.9557	3.1859
9.79875	7.9007	33.2756
47.4092	3.4607	5.73299
5.16363	6.0776	3.0768
5.89589	4.4786	<3
8.29156	6.0304	<3
10.0635	10.5638	<3
40.3888	7.6973	<3
5.43732	7.633	<3
4.40369	6.9706	3.6707
42.6294	7.3792	<3
10.5772	3.3712	<3
7.65811	4.3954	<3
32.7792	6.2657	<3
10.232	25.5828	3.34305
62.5708	<3	<3
48.2471	5.0771	3.79072
12.9189	<3	25.7929
7.60077	<3	<3
4.10692	<3	<3
6.26311	3.3748	3.312
30.5119	4.5068	<3
40.7629	8.23411	<3
9.59626	4.8836	<3
5.9817	<3	<3
29.211	3.9626	32.1882
6.22185	3.4455	18.9493
41.6431	4.49012	26.5737
35.3145	<3	3.4361
29.551	<3	<3
37.1327	<3	<3
4.46802	<3	4.37621
7.25539	<3	<3
4.37328	3.9635	5.53295
7.82069	<3	<3
7.51402	<3	21.9109
6.31285	<3	<3
6.36954	<3	<3
42.356	<3	27.2176
33.6725	4.3556	<3
32.8462	3.248	<3
10.6003	3.9143	16.4877
5.6891	4.2672	<3
6.18698	4.571	<3
7.19054	7.19449	27.6117
4.73761	<3	34.7907
13.5399	<3	4.0349
11.0736	3.6079	17.194
6.1281	6.11133	6.89394
11.0597	4.04879	<3
9.0081	3.38	<3
7.38894	<3	5.5642
31.9901	3.51066	25.3312
30.1817	<3	<3
7.89312	<3	<3
6.35731	<3	<3
27.8921	4.7164	3.0914
33.8163	4.6758	<3
7.8735	5.2899	3.58488
9.72603	<3	<3
6.52989	<3	<3
52.1533	<3	<3
6.8146	3.5566	8.7195
6.74391	<3	<3
6.1707	3.6114	<3
28.5702	4.7536	11.5073
27.1445	3.8494	<3
9.67536	<3	<3
8.14187	<3	<3
44.979	<3	<3
7.91819	<3	<3
10.4542	<3	6.22679
47.6157	<3	24.2538
25.673	<3	13.3096
8.13762	<3	20.0636
4.4356	3.6278	<3
8.53503	6.4273	<3
8.95207	3.27	<3
24.4203	<3	3.08117
4.39095	<3	23.7305
4.57853	<3	5.6479
36.0688	4.944	<3
25.8554	<3	<3
5.99509	3.37195	3.31908
5.57936	<3	27.8709
5.26363	<3	25.397
5.70507	<3	3.33512
[truncated: 2,609 more rows]
