# Supplementary material for: Discovery of a heparan sulfate binding domain in monkeypox virus H3 as an anti-poxviral drug target combining AI and MD simulations
Source: eLife. 2025 Jan 16;13:RP100545. doi: 10.7554/eLife.100545 (PMC11737874; doi:10.7554/eLife.100545)
Supplement: Figure 4—source data 2. [file elife-100545-fig4-data2.xlsx]

## Sheet: Sheet1
WT	Uncharged	Control
0.460938	0.230469	0.101562
0.464844	0.25	0.113281
0.390625	0.273438	0.125
0.417969	0.265625	0.0898438
0.433594	0.265625	0.140625
0.433594	0.273438	0.144531
0.457031	0.253906	0.136719
0.402344	0.214844	0.121094
0.40625	0.238281	0.140625
0.425781	0.238281	0.0859375
0.398438	0.210938	0.132812
0.4375	0.273438	0.179688
0.425781	0.234375
0.433594	0.296875
0.464844	0.222656
0.402344	0.222656
0.429688	0.261719
0.464844
