# Supplementary material for: Discovery of a heparan sulfate binding domain in monkeypox virus H3 as an anti-poxviral drug target combining AI and MD simulations
Source: eLife. 2025 Jan 16;13:RP100545. doi: 10.7554/eLife.100545 (PMC11737874; doi:10.7554/eLife.100545)
Supplement: Figure 4—source data 3. [file elife-100545-fig4-data3.xlsx]

## Sheet: Sheet1
Blank	Control	WT	Uncharged
25014	136151	562676	525072
21350.8	149186	682541	507163
20873.6	157527	695725	545450
20690.1	145493	644863	571093
20525.4	142067	698191	513570
20421.5	148741	704126	539157
20565.4	154592	699852	518352
20485.1	138810	690098	515633
20655.8	147985	659977	505089
20524.9	145461	668934	530945
