# Supplementary material for: Discovery of a heparan sulfate binding domain in monkeypox virus H3 as an anti-poxviral drug target combining AI and MD simulations
Source: eLife. 2025 Jan 16;13:RP100545. doi: 10.7554/eLife.100545 (PMC11737874; doi:10.7554/eLife.100545)
Supplement: Figure 5—source data 1. [file elife-100545-fig5-data1.xlsx]

## Sheet: Sheet1
Control	10 mM	50 mM	100 mM
1.0592	0.886136	0.881407	0.895593
1.03083	0.872896	0.869113	0.899376
0.993002	0.86533	0.850199	0.904104
0.974087	0.847361	0.844524	0.881407
0.942879	0.809533	0.841687	0.875733
