# Supplementary material for: Discovery of a heparan sulfate binding domain in monkeypox virus H3 as an anti-poxviral drug target combining AI and MD simulations
Source: eLife. 2025 Jan 16;13:RP100545. doi: 10.7554/eLife.100545 (PMC11737874; doi:10.7554/eLife.100545)
Supplement: Figure 5—source data 2. [file elife-100545-fig5-data2.xlsx]

## Sheet: Sheet1
Time (s)	20000 mM	10000 mM	5000 mM	2500 mM	1250 mM
0	0.00109984	0.000346626	0.001484	-0.00071631	2.06e-05
0.2	0.00079423	0.000338258	0.001703	-0.0005264	3.53e-05
0.4	0.000448806	0.000328476	0.001872	-0.00039616	2.89e-05
0.6	0.000133224	0.00315358	0.002047	-0.00023085	1.3e-05
0.8	-0.0001822	0.00299698	0.002104	-5.6e-05	3.78e-07
1	-0.00048527	0.00288468	0.002199	7.26e-05	-5.96e-06
1.2	0	0.00269511	0.002361	0.000187548	-1.92e-05
1.4	-0.00181685	0.00247067	0.002451	0.000283876	-9.31e-06
1.6	-0.00307955	0.00229388	0.002537	0.000359662	-9.77e-06
1.8	-0.00323051	0.00211581	0.002629	0.000381336	4.36e-06
2	-0.00272659	0.00191897	0.002678	0.000383507	4.95e-06
2.2	-0.0016878	0.00174758	0.002606	0.000327287	1.81e-05
2.4	-7.65e-05	0.00159997	0.002646	0.000350704	8.13e-06
2.6	0.00175732	0.00150846	0.002423	0.000380906	2.99e-05
2.8	0.00313325	0.00151451	0.002257	0.000374442	6.98e-05
3	0.00453915	0	0.002101	0.000413617	9.68e-05
3.2	0.00570606	-0.00053004	0.001833	0.000390912	0.000115086
3.4	0.00666156	-0.00023681	0.001626	0.000394972	0.000121027
3.6	0.00779556	0.000436	0.001385	0.000394561	0.000140064
3.8	0.00881807	0.00062449	0.001195	0.000333287	0.000139934
4	0.00960115	0.00058445	0.001012	0.000334971	0.00015697
4.2	0.0113949	0.00129528	0.000853	0.000440075	0.000166139
4.4	0.0128891	0.00139977	0.000604	0.000447928	0.000155448
4.6	0.0142925	0.00202828	0.000405	0.000466989	0.000150137
4.8	0.0159319	0.00252899	0.000213	0.000442828	0.000128494
5	0.0174573	0.0034929	8.15e-05	0.000403348	0.0001292
5.2	0.0196037	0.00354185	1.37e-05	0.000344894	0.000120234
5.4	0.0211673	0.00384801	-0.00013	0.000309564	0.000118292
5.6	0.0228746	0.00484953	-0.00021	0.000247801	9.51e-05
5.8	0.0248557	0.00530437	-0.00029	0.00013917	8.77e-05
6	0.0264069	0.00578772	0.01078	0.00507652	0.00507167
6.2	0.0278055	0.00656708	0.009828	0.0049514	0.00506466
6.4	0.0299493	0.00768287	0.009866	0.00490319	0.00505724
6.6	0.0313879	0.00859884	0.009513	0.00486578	0.00505103
6.8	0.0325465	0.00937903	0.009063	0.00476085	0.00505401
7	0.0341387	0.00958561	0.009009	0.00469273	0.00502667
7.2	0.0343803	0.0106079	0.009065	0.00460621	0.00501254
7.4	0.035233	0.0113696	0.009495	0.00447639	0.00499549
7.6	0.0362691	0.0122264	0.009948	0.00443825	0.00500065
7.8	0.0371647	0.0125659	0.010387	0.00437264	0.00500867
8	0.0379717	0.0130473	0.010945	0.00440923	0.00499685
8.2	0.0397817	0.0137133	0.011388	0.00441708	0.00499275
8.4	0.0402961	0.0140891	0.011716	0.00436582	0.00499479
8.6	0.0412653	0.0148363	0.012025	0.00431146	0.00498252
8.8	0.0424638	0.0153686	0.012281	0.0042555	0.0049627
9	0.0432136	0.0156388	0.011796	0.00423066	0.00496412
9.2	0.0447838	0.0167701	0.012166	0.00418556	0.00493897
9.4	0.0457611	0.0175833	0.011804	0.00419663	0.00492141
9.6	0.0473073	0.0188189	0.011601	0.00412334	0.0048988
9.8	0.0481713	0.0197935	0.011486	0.00405748	0.00488105
10	0.0499076	0.0203326	0.011681	0.004124	0.00486542
10.2	0.0512726	0.0212555	0.011114	0.00414142	0.00482959
10.4	0.0528253	0.0217156	0.011507	0.004185	0.00478205
10.6	0.0534725	0.0223915	0.011775	0.00415664	0.00472141
10.8	0.0540423	0.0229783	0.011952	0.00413863	0.00469002
11	0.0551493	0.0234355	0.012996	0.0041331	0.00461728
11.2	0.0558298	0.0238506	0.013561	0.00409763	0.0045902
11.4	0.0574311	0.0242383	0.013652	0.00399568	0.00456139
11.6	0.0583802	0.024932	0.013982	0.00396787	0.0045445
11.8	0.058776	0.0253295	0.014273	0.00392389	0.00453261
12	0.0598719	0.0261617	0.014584	0.00394411	0.00452151
12.2	0.0610476	0.0264883	0.014615	0.006342	0.00452213
12.4	0.0612063	0.0267181	0.014655	0.00599513	0.0045206
12.6	0.0624931	0.0268539	0.014651	0.00545614	0.00450727
12.8	0.062828	0.0268944	0.014926	0.00487906	0.00452193
13	0.0634361	0.0272983	0.014973	0.00513012	0.00450463
13.2	0.0642577	0.0286335	0.016033	0.00511516	0.0045037
13.4	0.0645736	0.0291566	0.016012	0.00538956	0.00451176
13.6	0.0649098	0.0299157	0.016575	0.0047968	0.00450074
13.8	0.0650204	0.0304685	0.016977	0.00581399	0.00450906
14	0.0662592	0.0308458	0.016958	0.00717643	0.00449986
14.2	0.0666725	0.0316544	0.016816	0.00683645	0.00448269
14.4	0.0669893	0.0319834	0.017159	0.00680835	0.00446579
14.6	0.0671629	0.0329442	0.01772	0.00644264	0.00446694
14.8	0.068072	0.0337176	0.018548	0.00685356	0.00446537
15	0.0690589	0.0341898	0.018604	0.00696067	0.0044554
15.2	0.0702578	0.0350461	0.018655	0.00605744	0.0044529
15.4	0.0714869	0.0359967	0.01845	0.00483016	0.00442004
15.6	0.0726362	0.0367766	0.018583	0.00480187	0.00440116
15.8	0.0737153	0.0373597	0.018563	0.00486072	0.0044037
16	0.0747282	0.0377635	0.019051	0.00479433	0.00439045
16.2	0.0751652	0.0374512	0.018797	0.00471376	0.00438818
16.4	0.0761241	0.0373331	0.019226	0.00517812	0.0043696
16.6	0.077349	0.0374209	0.019371	0.00524563	0.0043577
16.8	0.077595	0.0375465	0.019666	0.0059019	0.00437268
17	0.0788659	0.0381766	0.019579	0.00670268	0.00435127
17.2	0.079441	0.0389628	0.02027	0.00727081	0.00434562
17.4	0.0798583	0.0394939	0.019864	0.00748353	0.00432513
17.6	0.0803911	0.0396621	0.020161	0.00724485	0.00430878
17.8	0.0812467	0.0403785	0.020142	0.00804177	0.00431288
18	0.0821407	0.0409283	0.020346	0.00802167	0.00431573
18.2	0.0824914	0.041511	0.020704	0.00743326	0.00431273
18.4	0.0829951	0.0419154	0.020716	0.00734835	0.00432309
18.6	0.0832564	0.0427582	0.020748	0.00652247	0.0043333
18.8	0.0838902	0.0431163	0.020768	0.00656167	0.00432211
19	0.0844581	0.0434915	0.020545	0.00611657	0.00432869
19.2	0.0853286	0.0443943	0.020996	0.00536336	0.00429339
19.4	0.0862582	0.0450061	0.02148	0.0051402	0.00427387
19.6	0.0874531	0.0453494	0.02211	0.00548295	0.00428532
19.8	0.0872655	0.0458707	0.022344	0.00512418	0.00427033
20	0.0879044	0.0460941	0.023002	0.00527122	0.00426993
20.2	0.0888334	0.0462961	0.023472	0.00544731	0.00428044
20.4	0.0895957	0.0470518	0.024457	0.00545186	0.00427505
20.6	0.0899908	0.0474011	0.02458	0.00556759	0.00429039
20.8	0.0904745	0.0484875	0.02476	0.00610737	0.00430059
21	0.0917699	0.0487327	0.024998	0.0067188	0.00430068
21.2	0.0923003	0.0492439	0.025972	0.00749319	0.00429582
21.4	0.0927939	0.0489189	0.02561	0.00714264	0.00430082
21.6	0.0931579	0.0492709	0.02608	0.00713589	0.00431914
21.8	0.0940083	0.0494023	0.026493	0.00717153	0.00433987
22	0.0947117	0.0495331	0.026507	0.00727104	0.00435706
22.2	0.094499	0.0500336	0.026382	0.00693728	0.00434909
22.4	0.094999	0.0499508	0.0255	0.00660891	0.0043607
22.6	0.0950717	0.0499538	0.025288	0.00640858	0.00435967
22.8	0.0956017	0.0504051	0.025487	0.0067071	0.00435237
23	0.0963598	0.0512721	0.025573	0.00720153	0.00433877
23.2	0.0966552	0.0519147	0.025495	0.0074522	0.00431644
23.4	0.0973701	0.0526654	0.026165	0.00760324	0.00429746
23.6	0.0984712	0.0530863	0.025918	0.00752324	0.00427148
23.8	0.0986714	0.0536023	0.026258	0.00800191	0.00425118
24	0.0997192	0.0538422	0.027354	0.00793325	0.00426927
24.2	0.100166	0.0543613	0.027756	0.00778994	0.00426183
24.4	0.100211	0.0547597	0.027745	0.00803278	0.00427258
24.6	0.100578	0.0554071	0.027677	0.00855985	0.00428907
24.8	0.101524	0.0564844	0.027814	0.00908524	0.00429458
25	0.101926	0.0563976	0.027415	0.00931223	0.00432109
25.2	0.102572	0.0568314	0.027768	0.00981628	0.00434856
25.4	0.102891	0.057148	0.027453	0.00983064	0.00436712
25.6	0.103524	0.0577755	0.027962	0.0101671	0.00439152
25.8	0.104621	0.0581467	0.02864	0.0106346	0.00439896
26	0.104758	0.0586933	0.028822	0.0105427	0.00441725
26.2	0.104422	0.0591437	0.02942	0.0105787	0.00442739
26.4	0.105091	0.059387	0.029322	0.0109403	0.00444078
26.6	0.10572	0.0597126	0.030092	0.0115454	0.00443727
26.8	0.105631	0.0612409	0.030614	0.0113928	0.00443112
27	0.105695	0.0615801	0.030934	0.0113812	0.00444786
27.2	0.105944	0.061579	0.031344	0.0111164	0.0044524
27.4	0.106456	0.0618805	0.032177	0.0111459	0.00443328
27.6	0.107239	0.0614199	0.032516	0.0107527	0.00443243
27.8	0.107485	0.0612227	0.033509	0.0107242	0.0044561
28	0.108636	0.0610911	0.033695	0.0104318	0.00447911
28.2	0.109019	0.0613396	0.033841	0.0108231	0.00449116
28.4	0.108885	0.0614785	0.033635	0.0112957	0.00450229
28.6	0.109621	0.0618533	0.033386	0.0110653	0.00451912
28.8	0.110469	0.0613088	0.033249	0.0111871	0.00450335
29	0.110282	0.0613473	0.032873	0.011227	0.00452131
29.2	0.111756	0.0617007	0.0332	0.0111267	0.00454591
29.4	0.112646	0.0620957	0.033039	0.0110508	0.00454462
29.6	0.113615	0.0625677	0.033467	0.0110604	0.00457003
29.8	0.114224	0.0630893	0.034177	0.0110832	0.0045768
30	0.114635	0.0634713	0.03441	0.0102886	0.00457951
30.2	0.114875	0.0642629	0.034037	0.0105171	0.00458835
30.4	0.11569	0.064823	0.033852	0.0109047	0.00458613
30.6	0.116276	0.0655478	0.034037	0.0112905	0.00458695
30.8	0.116198	0.0666949	0.033825	0.0102839	0.0045732
31	0.116807	0.0666623	0.033314	0.0100837	0.0046045
31.2	0.117725	0.0672745	0.032914	0.0101115	0.0045836
31.4	0.117935	0.0677365	0.03281	0.0102853	0.0045634
31.6	0.119039	0.0678215	0.033002	0.0101665	0.00456285
31.8	0.119914	0.0683344	0.033691	0.0107997	0.00456475
32	0.120698	0.0685966	0.033606	0.0115401	0.00457412
32.2	0.120154	0.0690726	0.033938	0.0125079	0.006932
32.4	0.1201	0.0691082	0.034016	0.0127219	0.00669655
32.6	0.120617	0.0690326	0.034237	0.0125233	0.00637577
32.8	0.120842	0.0693439	0.034517	0.0133577	0.00593401
33	0.121036	0.0702774	0.034933	0.0135403	0.00644075
33.2	0.12228	0.0708608	0.035314	0.0133858	0.0070932
33.4	0.122825	0.0712143	0.035525	0.0135434	0.00672711
33.6	0.123599	0.0718263	0.036318	0.0141496	0.00754463
33.8	0.123624	0.0719803	0.036417	0.0138608	0.00711942
34	0.124274	0.072798	0.036184	0.0129827	0.00723971
34.2	0.124444	0.0729189	0.036139	0.0132501	0.00747175
34.4	0.125226	0.0726942	0.036296	0.0135882	0.00752727
34.6	0.125716	0.0727263	0.036285	0.0134156	0.00751695
34.8	0.126394	0.072531	0.035924	0.0125675	0.00694425
35	0.126714	0.0718758	0.03592	0.0121688	0.00713362
35.2	0.127004	0.0719758	0.035895	0.0119673	0.00681474
35.4	0.126843	0.0716656	0.036691	0.0124979	0.00627318
35.6	0.127057	0.0722615	0.037511	0.0128133	0.00590096
35.8	0.127172	0.072698	0.037922	0.0127097	0.00651124
36	0.127211	0.0730798	0.037899	0.012568	0.00681999
36.2	0.127405	0.0733242	0.038268	0.0131783	0.00691195
36.4	0.127751	0.0738907	0.038615	0.0127849	0.0073962
36.6	0.128013	0.0740507	0.038663	0.012942	0.00782786
36.8	0.128999	0.0747292	0.038834	0.0132978	0.00815591
37	0.129653	0.0753456	0.039496	0.0137693	0.008089
37.2	0.130317	0.0762577	0.039373	0.0141741	0.00834701
37.4	0.13074	0.076581	0.039566	0.0146859	0.00831763
37.6	0.131473	0.077323	0.040088	0.0150041	0.00845581
37.8	0.131756	0.0773262	0.040331	0.0147414	0.00836495
38	0.132842	0.0783266	0.040581	0.0148931	0.00883969
38.2	0.133393	0.0784622	0.041174	0.0155543	0.00802739
38.4	0.133947	0.0782899	0.041039	0.0160141	0.00794857
38.6	0.133588	0.078444	0.041167	0.0163737	0.00761104
38.8	0.134259	0.0789181	0.041607	0.0163168	0.00731717
39	0.13429	0.0792078	0.042314	0.0160184	0.00682387
39.2	0.134465	0.0799965	0.042141	0.0161287	0.00703488
39.4	0.134505	0.080711	0.042755	0.0161961	0.00666
39.6	0.134481	0.0815381	0.042103	0.0155056	0.0063503
39.8	0.135361	0.0816126	0.041585	0.014781	0.0065641
40	0.135824	0.0814293	0.041346	0.0147183	0.0064865
40.2	0.136317	0.0814709	0.04097	0.0151352	0.00660192
40.4	0.136551	0.0818586	0.040709	0.0144618	0.00709778
40.6	0.136962	0.0819702	0.040733	0.0144576	0.00688738
40.8	0.138078	0.0824545	0.041043	0.0145966	0.00624025
41	0.138708	0.0822107	0.041677	0.0148213	0.00592154
41.2	0.139058	0.0821034	0.041677	0.0152234	0.00569496
41.4	0.139987	0.0814772	0.041896	0.0152627	0.00533285
41.6	0.141299	0.0810101	0.041895	0.0161239	0.00515047
41.8	0.141539	0.0808907	0.042416	0.0167859	0.00572979
42	0.142154	0.0815617	0.042679	0.0169394	0.00533724
42.2	0.142375	0.0814965	0.04327	0.0177634	0.00477893
42.4	0.14238	0.0815152	0.04363	0.0182514	0.00526175
42.6	0.142662	0.0815969	0.04384	0.0184834	0.00552283
42.8	0.143529	0.0820375	0.04458	0.0180509	0.00574833
43	0.143492	0.0819692	0.045143	0.0174699	0.00594435
43.2	0.143879	0.0821159	0.044771	0.0175015	0.0065958
43.4	0.143826	0.0821684	0.044897	0.0169281	0.00616278
43.6	0.144248	0.0823602	0.044546	0.0167156	0.00591123
43.8	0.144623	0.0828152	0.044552	0.0169658	0.00585326
44	0.144676	0.0834317	0.044352	0.0171617	0.00589922
44.2	0.1449	0.0841414	0.044401	0.0173519	0.00571365
44.4	0.145039	0.0845394	0.044616	0.0174049	0.00541688
44.6	0.144971	0.0851234	0.044916	0.0169407	0.00501483
44.8	0.145097	0.085197	0.045702	0.0167351	0.00524887
45	0.145295	0.0850221	0.045582	0.0163669	0.00579646
45.2	0.145856	0.0854747	0.045527	0.0163617	0.00562854
45.4	0.146558	0.0859307	0.045574	0.016636	0.00622874
45.6	0.146595	0.0863216	0.046013	0.0170613	0.00676637
45.8	0.146264	0.0870421	0.04665	0.0168489	0.00684131
46	0.147127	0.0876211	0.046609	0.0170338	0.00660182
46.2	0.147447	0.0871587	0.046754	0.017599	0.00652951
46.4	0.148188	0.0875068	0.046528	0.0174429	0.00695964
46.6	0.14853	0.0877777	0.046271	0.0170349	0.00693871
46.8	0.149563	0.0882185	0.046466	0.0169027	0.00673457
47	0.149833	0.0885576	0.046268	0.0166213	0.00647907
47.2	0.150519	0.0885704	0.046432	0.0167252	0.00623242
47.4	0.150819	0.0886259	0.046542	0.0166892	0.00546203
47.6	0.152088	0.0893479	0.046493	0.0169044	0.00520154
47.8	0.152162	0.0898956	0.046282	0.0173431	0.0047308
48	0.152972	0.090228	0.046318	0.0178332	0.00442402
48.2	0.152582	0.0905159	0.046333	0.0175573	0.00432996
48.4	0.152612	0.0905497	0.046471	0.0177353	0.00460883
48.6	0.152417	0.0910358	0.046829	0.0174188	0.00524072
48.8	0.15272	0.0910957	0.047251	0.0173259	0.00544292
49	0.153322	0.0916553	0.047048	0.0171673	0.00570067
49.2	0.154064	0.0924077	0.047939	0.0167861	0.00618832
49.4	0.153655	0.0925593	0.048392	0.017337	0.00638886
49.6	0.153979	0.0928175	0.048393	0.0172469	0.00603841
49.8	0.154421	0.0929127	0.048543	0.0171962	0.00586503
50	0.155056	0.092895	0.048696	0.0174338	0.00542897
50.2	0.15493	0.0924035	0.048796	0.0178332	0.00507942
50.4	0.155326	0.0929333	0.048796	0.0177848	0.00498619
50.6	0.15575	0.0927129	0.048675	0.018143	0.00444059
50.8	0.15609	0.0925096	0.048863	0.0187031	0.00411913
51	0.156067	0.0924695	0.048308	0.0182536	0.00406758
51.2	0.156788	0.0924692	0.048529	0.0183253	0.00438819
51.4	0.157316	0.0928738	0.048556	0.0191781	0.0037764
51.6	0.157766	0.0932775	0.048263	0.0192058	0.00415476
51.8	0.158003	0.093553	0.048941	0.0195257	0.00427352
52	0.158443	0.0938871	0.049415	0.0197828	0.00449665
52.2	0.158464	0.0939749	0.049321	0.0195815	0.00506125
52.4	0.159556	0.0938639	0.049899	0.0194823	0.00544138
52.6	0.160164	0.09484	0.049798	0.0195534	0.00564568
52.8	0.160833	0.0950478	0.050056	0.0194001	0.00594422
53	0.161541	0.096065	0.050305	0.0193115	0.00652824
53.2	0.161542	0.0969699	0.0506	0.0189978	0.00742654
53.4	0.161309	0.0975384	0.050748	0.0193222	0.00643773
53.6	0.161858	0.098521	0.051276	0.019183	0.00643975
53.8	0.16201	0.0990031	0.052223	0.0187354	0.00627184
54	0.162107	0.0989749	0.052548	0.0195357	0.00582257
54.2	0.162555	0.0991248	0.052668	0.0199697	0.00608891
54.4	0.163617	0.099415	0.052489	0.0203144	0.00637311
54.6	0.164219	0.0997879	0.052354	0.020541	0.00610022
54.8	0.164551	0.100409	0.052453	0.0203615	0.00598296
55	0.164985	0.100705	0.051467	0.0197734	0.00587364
55.2	0.16496	0.100778	0.051636	0.0203486	0.00568726
55.4	0.164927	0.100609	0.051944	0.0209631	0.00533171
55.6	0.164924	0.100359	0.052035	0.0210074	0.00570592
55.8	0.165392	0.100276	0.053069	0.0210371	0.00540335
56	0.165986	0.100182	0.052734	0.0204199	0.00486251
56.2	0.166171	0.100227	0.05245	0.0200832	0.00463355
56.4	0.166316	0.100444	0.052763	0.019408	0.00450443
56.6	0.166361	0.100978	0.052695	0.0195256	0.00462015
56.8	0.166806	0.101058	0.053047	0.0197647	0.00514263
57	0.167456	0.101521	0.052834	0.0196631	0.00437032
57.2	0.167073	0.101617	0.052946	0.0198285	0.00441457
57.4	0.167787	0.101905	0.053976	0.0200274	0.00368948
57.6	0.168038	0.102027	0.0548	0.020002	0.00415698
57.8	0.16868	0.102665	0.054841	0.0204475	0.00412403
58	0.169593	0.102314	0.055067	0.0206559	0.00447448
58.2	0.170186	0.103306	0.055111	0.0207834	0.00470787
58.4	0.170604	0.103568	0.055174	0.0212635	0.00467691
58.6	0.170898	0.103963	0.05568	0.0210776	0.00451028
58.8	0.171281	0.103998	0.055342	0.0215418	0.00464737
59	0.171505	0.10363	0.054492	0.0218263	0.00490123
59.2	0.1717	0.103113	0.054948	0.0224663	0.00497002
59.4	0.171853	0.102927	0.055365	0.0229534	0.00494155
59.6	0.171612	0.102659	0.055756	0.0230009	0.00477388
59.8	0.171943	0.103125	0.055797	0.0223617	0.00464577
60	0.172212	0.103741	0.055493	0.0221399	0.0041734
60.2	0.172076	0.104044	0.055792	0.0220056	0.00412446
60.4	0.172381	0.10422	0.056316	0.022037	0.00457566
60.6	0.172738	0.104035	0.056368	0.0224752	0.00499781
60.8	0.173741	0.104058	0.056603	0.0226516	0.00499154
61	0.173991	0.104143	0.056394	0.0222636	0.0044629
61.2	0.173873	0.10513	0.057149	0.0223969	0.00502518
61.4	0.174228	0.105857	0.057539	0.0219537	0.00483645
61.6	0.174143	0.106329	0.057483	0.0221822	0.00512518
61.8	0.174814	0.107774	0.05744	0.0224605	0.00527927
62	0.175347	0.108227	0.05764	0.0223104	0.00569179
62.2	0.175159	0.109454	0.057409	0.0225892	0.00575595
62.4	0.175825	0.10969	0.057548	0.0228598	0.00533312
62.6	0.176818	0.110474	0.057439	0.0232296	0.00525972
62.8	0.17724	0.110074	0.056541	0.0236991	0.00566179
63	0.177242	0.110007	0.056327	0.0240744	0.0054259
63.2	0.176681	0.109751	0.056753	0.0242436	0.00508946
63.4	0.176555	0.109648	0.056769	0.0248967	0.00487468
63.6	0.176984	0.110146	0.056457	0.024813	0.00521846
63.8	0.177034	0.110804	0.056482	0.0248118	0.00505406
64	0.177345	0.110209	0.056833	0.0253642	0.00517212
64.2	0.177703	0.110072	0.057059	0.0250962	0.00503016
64.4	0.177807	0.109653	0.057436	0.0259519	0.00517255
64.6	0.178851	0.108838	0.05748	0.0257102	0.00563908
64.8	0.179134	0.109328	0.057655	0.0255332	0.00528105
65	0.179051	0.109307	0.05737	0.0253812	0.00518579
65.2	0.179192	0.110019	0.057568	0.0254144	0.00461311
65.4	0.179414	0.110062	0.057275	0.0251585	0.00453861
65.6	0.180361	0.110372	0.057456	0.0254033	0.0043306
65.8	0.180929	0.111132	0.057846	0.025328	0.00405021
66	0.181038	0.111272	0.057736	0.0255275	0.00396263
66.2	0.181373	0.111578	0.057606	0.0249664	0.00373835
66.4	0.1826	0.111804	0.057592	0.0250443	0.0033293
66.6	0.183172	0.111947	0.058068	0.0250746	0.00396866
66.8	0.18364	0.111959	0.057531	0.0248271	0.00424696
67	0.183651	0.112589	0.057856	0.0249105	0.00400014
67.2	0.183909	0.112569	0.058444	0.0251984	0.00417768
67.4	0.184477	0.112897	0.058731	0.0257463	0.00434833
67.6	0.184616	0.113793	0.05934	0.0248461	0.00471319
67.8	0.184375	0.113999	0.05994	0.0253954	0.00491352
68	0.184914	0.11326	0.060673	0.025544	0.00547202
68.2	0.185394	0.114191	0.060866	0.0259915	0.00562012
68.4	0.185922	0.114225	0.061285	0.026452	0.00554461
68.6	0.186563	0.114193	0.061978	0.0266672	0.00614751
68.8	0.1863	0.114507	0.062513	0.027002	0.00621685
69	0.186628	0.11427	0.062801	0.027102	0.00593381
69.2	0.18731	0.115235	0.063118	0.0276301	0.00539693
69.4	0.187788	0.11576	0.063817	0.0274882	0.00572492
69.6	0.188642	0.115681	0.064242	0.0277596	0.00490166
69.8	0.188647	0.115319	0.064386	0.0274248	0.00461746
70	0.189098	0.11503	0.06394	0.0275302	0.00440116
70.2	0.189943	0.114748	0.063447	0.027204	0.00418389
70.4	0.190527	0.114693	0.063353	0.0274719	0.00400958
70.6	0.190746	0.115115	0.063182	0.0273406	0.00395516
70.8	0.191552	0.115224	0.0626	0.0272999	0.00387229
71	0.191406	0.11503	0.062827	0.0274277	0.00414015
71.2	0.191455	0.115155	0.062876	0.0271003	0.00418328
71.4	0.191351	0.11553	0.062605	0.0268746	0.00401278
71.6	0.19085	0.115956	0.062468	0.0267157	0.00399963
71.8	0.190892	0.116056	0.061893	0.0273104	0.00445249
72	0.19068	0.115992	0.062443	0.0272611	0.0044516
72.2	0.190717	0.116542	0.062085	0.0276502	0.00466022
72.4	0.191022	0.116244	0.062598	0.0275156	0.00483107
72.6	0.191443	0.116686	0.06316	0.0278755	0.00545157
72.8	0.192002	0.116468	0.063368	0.0279657	0.00621713
73	0.191889	0.116934	0.063579	0.0277056	0.00596485
73.2	0.192543	0.117848	0.064581	0.0280944	0.00566547
73.4	0.192894	0.118571	0.065162	0.0274262	0.00578853
73.6	0.193995	0.11868	0.065382	0.0276485	0.00505233
73.8	0.193873	0.119141	0.065072	0.0276753	0.00506391
74	0.194001	0.11933	0.065332	0.0279949	0.00481408
74.2	0.193952	0.11963	0.064964	0.0280152	0.0044925
74.4	0.194423	0.120317	0.065249	0.0284034	0.00421697
74.6	0.195096	0.121153	0.064829	0.0282345	0.0042642
74.8	0.19573	0.121194	0.065142	0.0283398	0.00443565
75	0.195978	0.121626	0.065234	0.02841	0.00453609
75.2	0.196324	0.121708	0.06538	0.0286667	0.0043869
75.4	0.19625	0.121692	0.065376	0.0286695	0.00407523
75.6	0.196534	0.122306	0.065183	0.0289344	0.00429503
75.8	0.196955	0.122281	0.065639	0.0289424	0.00431474
76	0.197513	0.121808	0.065975	0.028985	0.00411503
76.2	0.197768	0.121691	0.065894	0.0290494	0.00456193
76.4	0.198232	0.122066	0.065506	0.0285981	0.00449701
76.6	0.19857	0.122589	0.065505	0.0285898	0.00495456
76.8	0.199168	0.122249	0.065758	0.0285065	0.00546308
77	0.199376	0.122732	0.066047	0.0279392	0.00529769
77.2	0.200079	0.123439	0.066644	0.0281573	0.00546945
77.4	0.200704	0.124095	0.066188	0.0277097	0.00571582
77.6	0.201336	0.123871	0.065797	0.0282148	0.00565123
77.8	0.200902	0.124278	0.065679	0.0286531	0.00564171
78	0.201277	0.124415	0.065693	0.0282135	0.00530523
78.2	0.201935	0.124879	0.065569	0.0285697	0.00489293
78.4	0.202395	0.125284	0.065238	0.0290153	0.00438683
78.6	0.202937	0.125572	0.06482	0.0295076	0.00454616
78.8	0.20342	0.125307	0.064989	0.029801	0.00404683
79	0.20375	0.125556	0.065127	0.0296747	0.00380233
79.2	0.204163	0.125493	0.065207	0.0299515	0.0038001
79.4	0.204354	0.126213	0.065509	0.0302464	0.00339658
79.6	0.205128	0.12643	0.066164	0.0312227	0.00361469
79.8	0.205606	0.126147	0.066648	0.0317848	0.00337416
80	0.206213	0.125716	0.066859	0.0321013	0.00369407
80.2	0.20591	0.126296	0.067341	0.0320664	0.00383834
80.4	0.206303	0.126976	0.067345	0.0321154	0.00359539
80.6	0.206429	0.127313	0.068568	0.0325223	0.00459158
80.8	0.206568	0.127132	0.06904	0.0327534	0.00498931
81	0.206358	0.127084	0.069249	0.0328596	0.0056066
81.2	0.206482	0.127345	0.06938	0.0325598	0.00636034
81.4	0.206494	0.12722	0.069647	0.0325411	0.00661156
81.6	0.206319	0.127476	0.070189	0.0329662	0.00644439
81.8	0.205827	0.128152	0.070846	0.0333415	0.00628149
82	0.205713	0.128922	0.071092	0.032465	0.00644595
82.2	0.205794	0.128967	0.071789	0.0329145	0.00607985
82.4	0.205331	0.129343	0.071287	0.0326686	0.00581817
82.6	0.205969	0.129418	0.071404	0.0323186	0.00523532
82.8	0.206504	0.12916	0.071439	0.0316168	0.00487335
83	0.206972	0.129964	0.071384	0.0311402	0.00453587
83.2	0.207707	0.130253	0.070639	0.0313926	0.0047549
83.4	0.208283	0.13033	0.071332	0.0316815	0.00452164
83.6	0.209153	0.129975	0.071218	0.0310092	0.00512304
83.8	0.209479	0.129847	0.071101	0.0306637	0.00467297
84	0.210005	0.12934	0.07141	0.0304126	0.00505025
84.2	0.210618	0.129876	0.071962	0.0299028	0.00500046
84.4	0.210834	0.130175	0.071993	0.0304118	0.00508061
84.6	0.211112	0.130423	0.072064	0.0305774	0.0055655
84.8	0.211633	0.130266	0.071425	0.0303347	0.00520541
85	0.212276	0.13052	0.071287	0.0304598	0.00545037
85.2	0.213349	0.130284	0.071042	0.0306673	0.00585905
85.4	0.213704	0.130671	0.071522	0.0311835	0.00579023
85.6	0.214293	0.13128	0.071795	0.0319708	0.00584629
85.8	0.214775	0.131505	0.07216	0.0323441	0.00596981
86	0.215175	0.132034	0.072395	0.0312084	0.00618782
86.2	0.21577	0.1319	0.072905	0.0315464	0.0055303
86.4	0.215924	0.1318	0.072588	0.0312681	0.0059667
86.6	0.217093	0.131932	0.072425	0.0313116	0.0058064
86.8	0.217393	0.132259	0.072017	0.0315538	0.00630219
87	0.218029	0.133589	0.071946	0.0318327	0.00633826
87.2	0.218322	0.1343	0.071724	0.0321666	0.00664854
87.4	0.218696	0.133836	0.072107	0.0321622	0.00635547
87.6	0.218714	0.134397	0.07136	0.0318198	0.00650244
87.8	0.218103	0.134213	0.07173	0.0322484	0.00678726
88	0.218088	0.134451	0.072248	0.0325407	0.0069926
88.2	0.218225	0.135197	0.072818	0.0328221	0.00685973
88.4	0.217802	0.135618	0.072068	0.0333967	0.00609324
88.6	0.218064	0.135847	0.072148	0.0339012	0.00595019
88.8	0.2184	0.135596	0.072146	0.0337561	0.00550894
89	0.218641	0.135674	0.072221	0.0344656	0.00538035
89.2	0.219614	0.135256	0.072115	0.0349488	0.00541082
89.4	0.220149	0.135789	0.07267	0.0347978	0.00516355
89.6	0.220365	0.135679	0.072794	0.0348373	0.00525659
89.8	0.220841	0.135798	0.073293	0.0342307	0.00496253
90	0.221213	0.13593	0.07384	0.0332404	0.00456364
90.2	0.221914	0.13579	0.074094	0.0336496	0.00422591
90.4	0.222529	0.13529	0.073662	0.0335204	0.00482788
90.6	0.223033	0.135625	0.073671	0.0336051	0.00485004
90.8	0.222814	0.136147	0.073922	0.0338592	0.00504749
91	0.223066	0.136982	0.073856	0.0345305	0.00503684
91.2	0.223456	0.137068	0.074077	0.0346589	0.00501197
91.4	0.223711	0.137058	0.073773	0.0347266	0.00554458
91.6	0.223772	0.13737	0.074304	0.0351071	0.00599867
91.8	0.22366	0.137149	0.075188	0.0358725	0.00611707
92	0.223757	0.137625	0.075451	0.0360292	0.00598469
92.2	0.22396	0.13768	0.075289	0.0364034	0.00622484
92.4	0.223923	0.137441	0.074731	0.0367517	0.00570598
92.6	0.223833	0.13752	0.07509	0.0368567	0.0063255
92.8	0.223985	0.137975	0.075073	0.0369197	0.00599449
93	0.224488	0.138622	0.074886	0.0372767	0.00575223
93.2	0.22508	0.138786	0.075104	0.0371605	0.00591656
93.4	0.225761	0.13913	0.075055	0.0368499	0.00568376
93.6	0.225664	0.13942	0.075015	0.0368261	0.00543503
93.8	0.226101	0.139704	0.074951	0.0369288	0.00524314
94	0.226224	0.140593	0.075287	0.0364114	0.00477325
94.2	0.226891	0.140908	0.074959	0.0361924	0.00475908
94.4	0.227259	0.140565	0.074921	0.0358822	0.00473439
94.6	0.226334	0.141092	0.075111	0.0355446	0.00457899
94.8	0.226024	0.141534	0.075154	0.0361248	0.00453357
95	0.226243	0.142139	0.075566	0.0364348	0.00491323
95.2	0.226745	0.141955	0.076238	0.036333	0.00543412
95.4	0.227058	0.142587	0.076934	0.0360335	0.00575059
95.6	0.227074	0.142132	0.077612	0.0360717	0.00497826
95.8	0.226932	0.141859	0.077766	0.0357447	0.00508833
96	0.226424	0.14193	0.077638	0.0357783	0.00543157
96.2	0.226272	0.141751	0.077461	0.0360405	0.00581168
96.4	0.226273	0.141861	0.077623	0.0362321	0.00604691
96.6	0.226798	0.142306	0.078176	0.0361988	0.00633922
96.8	0.227354	0.142763	0.0789	0.0365374	0.00628259
97	0.228163	0.143126	0.079154	0.0366586	0.00645716
97.2	0.228606	0.142923	0.079687	0.0366125	0.00663402
97.4	0.229731	0.143116	0.080095	0.036908	0.00652484
97.6	0.23001	0.14349	0.08011	0.0368677	0.00653405
97.8	0.231093	0.143985	0.080118	0.0366477	0.00668901
98	0.232111	0.144676	0.080699	0.0361524	0.00654833
98.2	0.233212	0.144532	0.080711	0.0361563	0.00664697
98.4	0.233626	0.144222	0.080832	0.0365477	0.00686926
98.6	0.233653	0.144467	0.081002	0.0367058	0.00715307
98.8	0.234374	0.144393	0.081283	0.0375719	0.00779007
99	0.234864	0.144558	0.081721	0.0376331	0.00845334
99.2	0.235208	0.14424	0.081697	0.0378444	0.00871397
99.4	0.235424	0.144296	0.082159	0.0377563	0.00890596
99.6	0.234987	0.143705	0.081827	0.0382221	0.00902767
99.8	0.234708	0.143313	0.081728	0.0386829	0.00986675
100	0.234718	0.143343	0.081754	0.0387049	0.00987935
100.2	0.236089	0.143714	0.081693	0.0387707	0.00980104
100.4	0.237488	0.143503	0.081644	0.0393781	0.00965957
100.6	0.238679	0.143766	0.082056	0.0398362	0.0097759
100.8	0.239979	0.144048	0.082057	0.0398949	0.0101679
101	0.241429	0.14375	0.082169	0.0398917	0.010416
101.2	0.242556	0.143673	0.082343	0.0407973	0.0106558
101.4	0.243843	0.143164	0.082087	0.0405929	0.0104966
101.6	0.24471	0.142262	0.081814	0.0405556	0.0109669
101.8	0.244977	0.141635	0.081727	0.0410273	0.0108307
102	0.245339	0.141267	0.081787	0.040626	0.0112328
102.2	0.24497	0.14059	0.081408	0.0399575	0.0115183
102.4	0.244387	0.139598	0.081269	0.0398772	0.0116891
102.6	0.243449	0.139221	0.081055	0.0399012	0.0116597
102.8	0.241739	0.139644	0.080974	0.0402054	0.011119
103	0.241254	0.139531	0.081413	0.0405871	0.0114098
103.2	0.240114	0.140096	0.081056	0.0406543	0.0107245
103.4	0.239278	0.139923	0.080902	0.0401147	0.0112251
103.6	0.238332	0.140265	0.080368	0.040493	0.0112195
103.8	0.237215	0.140482	0.080429	0.0400478	0.0111985
104	0.236732	0.140477	0.080358	0.0388748	0.0117057
104.2	0.235763	0.14018	0.079902	0.038851	0.01179
104.4	0.235334	0.139767	0.079758	0.0389147	0.0118055
104.6	0.234432	0.139639	0.079752	0.0385617	0.0121732
104.8	0.233637	0.138977	0.079111	0.0382208	0.0120874
105	0.23339	0.13778	0.079129	0.0380232	0.012027
105.2	0.232573	0.137301	0.079194	0.0383693	0.011872
105.4	0.232456	0.136222	0.07846	0.0381972	0.0116737
105.6	0.231712	0.135386	0.078299	0.038707	0.0122443
105.8	0.231169	0.135271	0.077836	0.0384551	0.0114522
106	0.231304	0.135083	0.077463	0.0377997	0.0122342
106.2	0.230769	0.134509	0.076665	0.0373994	0.0122323
106.4	0.231159	0.134134	0.076548	0.0377643	0.0121351
106.6	0.230449	0.134272	0.076178	0.0378879	0.0122281
106.8	0.230296	0.13427	0.075822	0.0376438	0.0122768
107	0.230646	0.133381	0.075893	0.037645	0.0121883
107.2	0.229758	0.133017	0.0757	0.0370009	0.0120822
107.4	0.229125	0.132424	0.075215	0.0365669	0.0122553
107.6	0.2287	0.132765	0.074686	0.0358669	0.0124338
107.8	0.22824	0.132688	0.074311	0.0351103	0.0127583
108	0.227664	0.132745	0.073855	0.0351435	0.0123267
108.2	0.226396	0.131935	0.073425	0.0354192	0.0126558
108.4	0.225957	0.131754	0.073318	0.0349302	0.012526
108.6	0.224345	0.130949	0.073068	0.0349776	0.0122921
108.8	0.223964	0.130168	0.072969	0.0350028	0.0122153
109	0.223626	0.129815	0.073043	0.0345833	0.0120896
109.2	0.222613	0.129891	0.07304	0.0345232	0.0119674
109.4	0.222089	0.129569	0.072858	0.0350584	0.0120143
109.6	0.222054	0.129186	0.07322	0.0351522	0.0117436
109.8	0.221958	0.128967	0.073082	0.0349693	0.0110634
110	0.221586	0.128737	0.073495	0.0348645	0.0120505
110.2	0.221353	0.128118	0.073766	0.0345581	0.0114386
110.4	0.221638	0.128026	0.074049	0.0349973	0.010728
110.6	0.221469	0.127516	0.073674	0.0347179	0.0104408
110.8	0.220653	0.126787	0.073809	0.0342443	0.00996965
111	0.220017	0.125883	0.074185	0.0345357	0.00956328
111.2	0.21973	0.125803	0.073841	0.0340663	0.01016
111.4	0.219004	0.125889	0.073213	0.0346422	0.0101597
111.6	0.218304	0.125581	0.07249	0.0348023	0.010606
111.8	0.217717	0.12507	0.071808	0.0353557	0.0101096
112	0.216773	0.124746	0.071655	0.0356312	0.00996423
112.2	0.215939	0.124914	0.071857	0.0353959	0.0104281
112.4	0.215451	0.124893	0.071545	0.0345552	0.0109569
112.6	0.214792	0.124325	0.071359	0.034412	0.0111127
112.8	0.214643	0.124332	0.071355	0.0339096	0.0113743
113	0.213696	0.124581	0.070955	0.0335298	0.0113758
113.2	0.213024	0.124968	0.0714	0.0332568	0.0119314
113.4	0.212663	0.124841	0.071571	0.0332526	0.0124072
113.6	0.212748	0.124667	0.071464	0.0332837	0.0123471
113.8	0.212476	0.124206	0.071215	0.0325705	0.0123115
114	0.211764	0.124143	0.071397	0.0316835	0.0126474
114.2	0.21157	0.12403	0.071015	0.0314169	0.0115435
114.4	0.211427	0.123934	0.070348	0.0312303	0.0111734
114.6	0.211014	0.123056	0.069797	0.0305984	0.0109172
114.8	0.210313	0.122646	0.069911	0.0307311	0.0104399
115	0.210702	0.122109	0.069937	0.0308379	0.0104751
115.2	0.2106	0.121167	0.069434	0.0305006	0.0103255
115.4	0.210241	0.120257	0.069157	0.0309943	0.00976889
115.6	0.20952	0.119552	0.068495	0.0307435	0.00946112
115.8	0.209177	0.119551	0.068203	0.0307576	0.00890175
116	0.208909	0.119651	0.068754	0.030682	0.00914741
116.2	0.208663	0.119965	0.068824	0.0311502	0.00977385
116.4	0.20799	0.11939	0.068623	0.0309278	0.0101336
116.6	0.207692	0.118994	0.068725	0.031193	0.0102799
116.8	0.207136	0.119219	0.068109	0.0319467	0.0104291
117	0.207383	0.119739	0.067338	0.0326563	0.0106418
117.2	0.207049	0.120318	0.067708	0.0327644	0.0109068
117.4	0.207004	0.120364	0.067129	0.033135	0.0113227
117.6	0.206918	0.120025	0.066818	0.0332467	0.0109631
117.8	0.206957	0.119121	0.066771	0.0326611	0.0110286
118	0.205818	0.119574	0.066936	0.0320205	0.0106905
118.2	0.205267	0.119522	0.066818	0.0313335	0.00991404
118.4	0.205375	0.119275	0.066879	0.0310087	0.00969402
118.6	0.20517	0.119005	0.066908	0.0308245	0.00906295
118.8	0.204517	0.118705	0.066959	0.0310861	0.00883033
119	0.204363	0.117752	0.067017	0.0304354	0.00844674
119.2	0.203597	0.117337	0.066981	0.0299756	0.00819032
119.4	0.203457	0.116865	0.067139	0.0298639	0.00864825
119.6	0.202551	0.11736	0.066831	0.0298984	0.00870253
119.8	0.202182	0.117045	0.066663	0.0292467	0.00902408
120	0.201939	0.117168	0.066586	0.0292915	0.00919396
120.2	0.201548	0.116875	0.065944	0.0295068	0.00978187
120.4	0.201291	0.116241	0.065754	0.0291979	0.00969149
120.6	0.201472	0.116387	0.06513	0.029684	0.0105187
120.8	0.201268	0.116768	0.065248	0.0302678	0.0106113
121	0.201933	0.116931	0.065202	0.0303664	0.0108339
121.2	0.201522	0.11681	0.065161	0.0297393	0.0114413
121.4	0.201347	0.116861	0.064441	0.0298795	0.0116736
121.6	0.200743	0.116495	0.063977	0.0299372	0.0116001
121.8	0.200397	0.11655	0.064471	0.0296171	0.0116783
122	0.200247	0.116863	0.064147	0.0291878	0.0110527
122.2	0.200108	0.116542	0.064116	0.029543	0.0105171
122.4	0.200229	0.115757	0.064189	0.0300718	0.0103664
122.6	0.199273	0.115156	0.063573	0.0300433	0.0102267
122.8	0.198427	0.114484	0.063795	0.0302786	0.0102267
123	0.198231	0.113501	0.064241	0.030051	0.00967921
123.2	0.197984	0.11323	0.064124	0.0302151	0.00921538
123.4	0.197804	0.112207	0.064322	0.0299433	0.00863903
123.6	0.197273	0.111998	0.063798	0.0300373	0.00837779
123.8	0.196871	0.111534	0.063816	0.0291901	0.00827283
124	0.196609	0.11186	0.063221	0.0294281	0.00866858
124.2	0.196132	0.111258	0.063631	0.0298202	0.00923508
124.4	0.195967	0.111479	0.063752	0.0295777	0.00970581
124.6	0.195572	0.111749	0.063452	0.0301212	0.0106781
124.8	0.195396	0.112012	0.06363	0.0297897	0.0110207
125	0.195745	0.112345	0.063068	0.0294722	0.0114518
125.2	0.195311	0.1131	0.062169	0.0292618	0.0119192
125.4	0.19469	0.113875	0.061503	0.0296675	0.0115579
125.6	0.195093	0.113927	0.061105	0.0297435	0.0115503
125.8	0.195016	0.114317	0.061102	0.0294472	0.0117363
126	0.195194	0.113841	0.060124	0.0294015	0.0116882
126.2	0.195277	0.113602	0.060149	0.0290492	0.0118742
126.4	0.195021	0.112943	0.060594	0.0279578	0.0121721
126.6	0.194381	0.11267	0.060378	0.027015	0.0118664
126.8	0.194496	0.112551	0.061132	0.0270696	0.0113119
127	0.194743	0.112377	0.061257	0.0265665	0.0103041
127.2	0.195093	0.112361	0.061072	0.0267462	0.00953675
127.4	0.194466	0.112225	0.060924	0.0263343	0.00942269
127.6	0.193905	0.112326	0.061565	0.0263135	0.00962063
127.8	0.193309	0.112363	0.061579	0.0266698	0.00942244
128	0.193509	0.112247	0.061754	0.0270018	0.00983477
128.2	0.192551	0.112228	0.062709	0.0274782	0.0095546
128.4	0.192301	0.112242	0.062213	0.0276086	0.00945454
128.6	0.191747	0.112216	0.06196	0.028261	0.00935898
128.8	0.191098	0.112194	0.061934	0.0280287	0.00851887
129	0.190983	0.112016	0.061615	0.0283159	0.00846505
129.2	0.190368	0.112395	0.061098	0.0286261	0.0083538
129.4	0.190208	0.11253	0.060861	0.0286218	0.00773926
129.6	0.190179	0.112351	0.060504	0.0287114	0.00781129
129.8	0.189752	0.112229	0.060076	0.0287689	0.00849447
130	0.189705	0.111401	0.060072	0.0279599	0.00799282
130.2	0.189753	0.11135	0.059709	0.0269029	0.00783562
130.4	0.189458	0.111048	0.059756	0.0262052	0.00771626
130.6	0.189667	0.110976	0.0597	0.0259696	0.00751153
130.8	0.190255	0.111283	0.059643	0.0261731	0.00749206
131	0.1901	0.110728	0.058948	0.0256768	0.007687
131.2	0.189946	0.110034	0.058814	0.0253485	0.00785849
131.4	0.189162	0.110097	0.059027	0.0254673	0.0081267
131.6	0.188639	0.109644	0.059659	0.0252957	0.00874252
131.8	0.188806	0.109199	0.059358	0.0259938	0.00905926
132	0.188788	0.109363	0.060483	0.0257442	0.00921425
132.2	0.188142	0.109319	0.06057	0.0254162	0.00881455
132.4	0.187977	0.108451	0.059914	0.0256445	0.00899331
132.6	0.187011	0.10818	0.060398	0.0255904	0.00854483
132.8	0.18627	0.107666	0.060044	0.0260223	0.00832114
133	0.185897	0.107522	0.060214	0.0262085	0.0085862
133.2	0.186078	0.107835	0.060546	0.0261277	0.00843111
133.4	0.185607	0.107848	0.060372	0.0258319	0.00842915
133.6	0.185049	0.107404	0.060192	0.0255666	0.00810672
133.8	0.184924	0.107092	0.059845	0.0259406	0.0086625
134	0.184206	0.10684	0.059261	0.0257749	0.00757165
134.2	0.183644	0.107181	0.058321	0.0259348	0.00762831
134.4	0.184072	0.107088	0.058035	0.0261089	0.00766818
134.6	0.184453	0.1068	0.057611	0.0259937	0.00754674
134.8	0.184301	0.106912	0.056692	0.025802	0.00782596
135	0.183745	0.106301	0.056145	0.0255577	0.00773769
135.2	0.183518	0.106101	0.056061	0.0256636	0.00784236
135.4	0.182981	0.105645	0.055863	0.0260355	0.00799056
135.6	0.182515	0.10497	0.056047	0.0259283	0.00854832
135.8	0.183013	0.104603	0.05629	0.0267697	0.00865872
136	0.182228	0.104264	0.056221	0.0266528	0.00870152
136.2	0.182719	0.103996	0.055824	0.0263007	0.00789457
136.4	0.182171	0.103559	0.055597	0.0270811	0.00785179
136.6	0.181337	0.10381	0.055846	0.0271623	0.00760414
136.8	0.181387	0.103792	0.055787	0.0274799	0.00765946
137	0.18158	0.104165	0.056367	0.0268504	0.0078188
137.2	0.18181	0.104622	0.056501	0.0263103	0.00794821
137.4	0.181224	0.104947	0.055822	0.0262632	0.00818461
137.6	0.181314	0.104967	0.055873	0.0263011	0.00781526
137.8	0.181132	0.105071	0.055674	0.0266985	0.00783194
138	0.181134	0.105273	0.055427	0.0266408	0.00725477
138.2	0.180798	0.105386	0.055603	0.0265412	0.00784715
138.4	0.181639	0.105478	0.055597	0.0261969	0.00771114
138.6	0.181464	0.105713	0.054923	0.0259734	0.00721247
138.8	0.180652	0.106072	0.054657	0.025532	0.00771361
139	0.180433	0.105496	0.054837	0.0255703	0.0071593
139.2	0.180213	0.105308	0.054844	0.0256425	0.00757219
139.4	0.179888	0.104831	0.054829	0.0254	0.00748446
139.6	0.179607	0.104526	0.055497	0.025846	0.00787994
139.8	0.179622	0.103692	0.055047	0.0263253	0.00793728
140	0.178939	0.103228	0.054793	0.0260948	0.00792378
140.2	0.178629	0.103507	0.054785	0.0257533	0.00718228
140.4	0.177678	0.103034	0.054982	0.0258641	0.00738184
140.6	0.177379	0.102776	0.055035	0.0255874	0.00761147
140.8	0.177524	0.102387	0.055635	0.0248401	0.00764549
141	0.177711	0.102316	0.055189	0.0240665	0.00794687
141.2	0.177233	0.10182	0.054714	0.0241664	0.00817265
141.4	0.177462	0.102008	0.054473	0.0241468	0.00818396
141.6	0.177481	0.101359	0.05482	0.0231788	0.00848445
141.8	0.177699	0.101154	0.05484	0.0235848	0.00881071
142	0.177933	0.101117	0.054866	0.0234822	0.00945679
142.2	0.177639	0.100866	0.055291	0.0233032	0.00920053
142.4	0.177958	0.101002	0.05505	0.0231065	0.00858657
142.6	0.177966	0.101417	0.054676	0.0231639	0.00806028
142.8	0.178142	0.101547	0.05551	0.0227902	0.00815611
143	0.178575	0.102086	0.055973	0.0228911	0.00770279
143.2	0.178165	0.10273	0.055798	0.0229811	0.00783284
143.4	0.178191	0.102808	0.055422	0.0235873	0.00732662
143.6	0.177745	0.102519	0.056004	0.024288	0.00661344
143.8	0.177157	0.102409	0.055593	0.0249952	0.00588426
144	0.176945	0.102689	0.055754	0.0255284	0.00568727
144.2	0.175734	0.103003	0.056205	0.0255559	0.0056884
144.4	0.175577	0.102769	0.056901	0.0257262	0.00591089
144.6	0.175761	0.102875	0.056497	0.0261082	0.00586954
144.8	0.1758	0.102742	0.055582	0.0261781	0.00588901
145	0.175816	0.102857	0.05477	0.0261064	0.0068498
145.2	0.175258	0.102484	0.054443	0.0265001	0.0069625
145.4	0.175242	0.102321	0.05423	0.0265309	0.00716472
145.6	0.174964	0.101617	0.053493	0.0268484	0.00806292
145.8	0.174711	0.101397	0.053265	0.0273692	0.00847227
146	0.174092	0.100987	0.053222	0.0267773	0.00867075
146.2	0.174124	0.100476	0.053333	0.0262986	0.00839312
146.4	0.174424	0.100685	0.052989	0.0258045	0.00872087
146.6	0.174245	0.100914	0.05336	0.0254164	0.00879498
146.8	0.174219	0.100497	0.053484	0.0245988	0.00897813
147	0.173875	0.100652	0.053025	0.0244778	0.00917938
147.2	0.173128	0.100296	0.052518	0.0241223	0.00908336
147.4	0.173223	0.0997762	0.052246	0.0243232	0.00823923
147.6	0.172586	0.0995158	0.052469	0.0240235	0.00721369
147.8	0.172238	0.099556	0.052709	0.0241501	0.00710872
148	0.172117	0.0993623	0.053265	0.0239573	0.0065642
148.2	0.171565	0.0993403	0.053989	0.023908	0.00640923
148.4	0.172027	0.0998146	0.053878	0.0243674	0.00642667
148.6	0.171818	0.100081	0.052949	0.0245203	0.00585874
148.8	0.1718	0.0991872	0.052111	0.0245303	0.0054674
149	0.171151	0.098886	0.052317	0.0243059	0.00577179
149.2	0.17062	0.0988573	0.051944	0.0255186	0.00485944
149.4	0.170219	0.0987326	0.051967	0.0256007	0.00520923
149.6	0.169841	0.0990636	0.051648	0.0253102	0.00555616
149.8	0.169494	0.0991028	0.051882	0.0250104	0.00535981
150	0.169509	0.099399	0.052163	0.024894	0.00562176
150.2	0.169409	0.0996048	0.052436	0.0242871	0.00608245
150.4	0.169523	0.0994892	0.052606	0.0240358	0.00646074
150.6	0.169476	0.099092	0.053459	0.0240038	0.00673979
150.8	0.169988	0.0987226	0.05376	0.0234774	0.00719058
151	0.169879	0.0989316	0.053682	0.023733	0.00727417
151.2	0.169901	0.0987152	0.053827	0.0233289	0.0073746
151.4	0.170341	0.0983836	0.053668	0.0224973	0.00678212
151.6	0.170668	0.0987835	0.053481	0.0226041	0.0059877
151.8	0.171269	0.0983546	0.05423	0.0222776	0.00617913
152	0.170801	0.0980664	0.053895	0.0223477	0.00553253
152.2	0.17047	0.0978648	0.053501	0.0225886	0.00591214
152.4	0.170348	0.0977563	0.052869	0.0232148	0.0059422
152.6	0.16916	0.0968926	0.052258	0.0229962	0.00521988
152.8	0.1688	0.0963495	0.051926	0.0230579	0.00528147
153	0.167824	0.0967149	0.051577	0.0228175	0.00509489
153.2	0.167273	0.0963646	0.051157	0.0228202	0.00480925
153.4	0.167403	0.096204	0.051113	0.022043	0.00531759
153.6	0.167081	0.0961134	0.050976	0.0219982	0.00551142
153.8	0.166847	0.0959198	0.051208	0.0222981	0.00523462
154	0.166459	0.0959115	0.05118	0.0221278	0.0058003
154.2	0.166421	0.0955159	0.051613	0.0223159	0.00634752
154.4	0.166867	0.0950887	0.051938	0.0221336	0.00644984
154.6	0.166929	0.0953914	0.052546	0.0220489	0.00659187
154.8	0.167091	0.0960763	0.052775	0.0222022	0.00720966
155	0.167598	0.096318	0.052149	0.0223588	0.00714083
155.2	0.168304	0.0969309	0.051961	0.0218487	0.00736945
155.4	0.168677	0.0970321	0.051493	0.0215317	0.0068783
155.6	0.168473	0.0972389	0.051312	0.0224355	0.0064273
155.8	0.168258	0.0965987	0.051835	0.0223638	0.00652344
156	0.167298	0.0972315	0.051222	0.0228911	0.00610337
156.2	0.167038	0.0968027	0.050645	0.0232709	0.00584392
156.4	0.166807	0.0971009	0.049981	0.0231208	0.00570984
156.6	0.166477	0.0971946	0.049766	0.0226536	0.00551729
156.8	0.166537	0.0973089	0.049672	0.0226994	0.00567016
157	0.16614	0.0968974	0.049746	0.0223442	0.0050036
157.2	0.166356	0.0960919	0.049758	0.0226171	0.00533511
157.4	0.16718	0.0959883	0.049862	0.0228571	0.00536328
157.6	0.166903	0.0955881	0.05008	0.0231137	0.0049843
157.8	0.166541	0.0956582	0.049665	0.0224199	0.00436832
158	0.166129	0.0952638	0.050053	0.0221534	0.00484317
158.2	0.166328	0.0950559	0.050457	0.0220506	0.00499563
158.4	0.166113	0.0951308	0.050607	0.0210077	0.00472121
158.6	0.166121	0.0952857	0.050981	0.0210535	0.00480602
158.8	0.166303	0.0952396	0.051166	0.0209839	0.00557711
159	0.166328	0.0954589	0.050763	0.0203953	0.00520917
159.2	0.166087	0.095654	0.050714	0.0197237	0.00531947
159.4	0.165727	0.0957327	0.050627	0.0196798	0.00506577
159.6	0.165382	0.0957725	0.050272	0.0194798	0.00492337
159.8	0.165503	0.09604	0.050477	0.0197202	0.004891
160	0.165182	0.0960599	0.050155	0.0193327	0.00487914
160.2	0.164975	0.0957777	0.04977	0.018805	0.00467659
160.4	0.164787	0.0961164	0.049635	0.0187533	0.00560768
160.6	0.164889	0.096267	0.050053	0.0188621	0.00519791
160.8	0.164466	0.095929	0.049749	0.0191687	0.00525227
161	0.164546	0.0956852	0.049274	0.0193553	0.00509541
161.2	0.164807	0.0958115	0.049131	0.0196849	0.00554348
161.4	0.165084	0.0957221	0.049036	0.0200819	0.00528896
161.6	0.164591	0.0953211	0.048809	0.0205564	0.00570773
161.8	0.164097	0.0952733	0.048687	0.0211574	0.00596665
162	0.163761	0.0950209	0.049272	0.0225645	0.00642028
162.2	0.163594	0.095189	0.048739	0.0230459	0.00617903
162.4	0.163602	0.0953635	0.048992	0.0235263	0.005917
162.6	0.163409	0.095236	0.049599	0.0241028	0.00585348
162.8	0.162479	0.0946555	0.049327	0.0243834	0.00664511
163	0.161651	0.0946195	0.048768	0.0245405	0.00639446
163.2	0.161263	0.0943079	0.048547	0.0246717	0.00634837
163.4	0.160841	0.0949522	0.048379	0.0246906	0.00629438
163.6	0.160907	0.0945666	0.048327	0.024283	0.00589693
163.8	0.160611	0.0938402	0.049167	0.024152	0.00575893
164	0.160361	0.0933123	0.049447	0.0235461	0.00621211
164.2	0.159946	0.0930252	0.049518	0.0229428	0.00639095
164.4	0.159694	0.0923606	0.049236	0.0229342	0.0068244
164.6	0.15921	0.0919867	0.049009	0.022133	0.00660014
164.8	0.15876	0.0912293	0.048333	0.0215502	0.00645007
165	0.15863	0.0912948	0.047812	0.0214287	0.00676704
165.2	0.159081	0.0908842	0.048332	0.0207926	0.0074794
165.4	0.159135	0.0908724	0.04818	0.0206444	0.00769603
165.6	0.159054	0.090839	0.048072	0.0212936	0.00823191
165.8	0.15886	0.091022	0.048317	0.0216948	0.00794586
166	0.158642	0.0912592	0.048748	0.0219259	0.007703
166.2	0.158466	0.0912468	0.049051	0.021796	0.00697933
166.4	0.158271	0.0914584	0.049942	0.0225471	0.00649395
166.6	0.158194	0.091063	0.04993	0.0225412	0.00616775
166.8	0.157804	0.0909149	0.049217	0.0225491	0.00627266
167	0.157503	0.0905106	0.048841	0.0223968	0.00571072
167.2	0.157367	0.0912998	0.048819	0.0225114	0.00542076
167.4	0.157605	0.0917574	0.048956	0.0224654	0.00530252
167.6	0.157999	0.0919	0.049	0.0223327	0.00540496
167.8	0.158487	0.0921743	0.049098	0.0222918	0.00527262
168	0.158821	0.092593	0.048644	0.0223853	0.00572866
168.2	0.158832	0.0928855	0.04819	0.0219028	0.00519629
168.4	0.158755	0.0925995	0.047927	0.0216022	0.00494253
168.6	0.158125	0.0928605	0.048076	0.0212427	0.00511267
168.8	0.158003	0.0932597	0.047459	0.0210016	0.00455272
169	0.158352	0.0941198	0.047843	0.0210579	0.004904
169.2	0.158818	0.0943568	0.048652	0.0208687	0.00494708
169.4	0.158425	0.0952337	0.048965	0.0207058	0.00467625
169.6	0.158623	0.0951646	0.049896	0.0208679	0.00460493
169.8	0.158799	0.0947649	0.050727	0.0205654	0.00464844
170	0.159084	0.0941789	0.05079	0.020019	0.00442795
170.2	0.159247	0.0937281	0.051012	0.0202029	0.00477066
170.4	0.15953	0.0932064	0.050783	0.0203007	0.00514653
170.6	0.160189	0.0922328	0.050427	0.0199058	0.00538437
170.8	0.159808	0.0916078	0.049977	0.0193193	0.00553528
171	0.159527	0.091108	0.049954	0.0196372	0.00575765
171.2	0.159599	0.0911742	0.049634	0.0202634	0.00596352
171.4	0.15988	0.090947	0.049505	0.0205658	0.00596079
171.6	0.159682	0.0909321	0.048797	0.0207721	0.00612975
171.8	0.159795	0.0908714	0.048042	0.0210893	0.00551113
172	0.159117	0.0904489	0.046864	0.0214163	0.00546482
172.2	0.158589	0.0904669	0.04645	0.0210598	0.00483517
172.4	0.157526	0.0900371	0.046052	0.021196	0.00468825
172.6	0.156582	0.0899103	0.046352	0.0214766	0.00513948
172.8	0.15667	0.090262	0.046073	0.0221203	0.00531583
173	0.156758	0.0905862	0.046642	0.0223488	0.00553033
173.2	0.15627	0.0906805	0.046758	0.0220878	0.00574537
173.4	0.155978	0.0907366	0.046876	0.0219715	0.00560764
173.6	0.155884	0.0910879	0.046697	0.0217174	0.00512407
173.8	0.155505	0.0909308	0.046636	0.0212874	0.00580297
174	0.155836	0.0908368	0.046303	0.020436	0.00562826
174.2	0.155991	0.0915607	0.046688	0.0208176	0.00581244
174.4	0.156259	0.0912667	0.046386	0.0201741	0.00551114
174.6	0.156599	0.0914949	0.046752	0.0200823	0.00563254
174.8	0.156161	0.0918625	0.04688	0.0194375	0.00549291
175	0.15636	0.0920304	0.046979	0.0199581	0.00519772
175.2	0.156243	0.0915393	0.047168	0.0202594	0.00536526
175.4	0.156574	0.0918923	0.04709	0.0199155	0.0056706
175.6	0.156227	0.0917866	0.046582	0.0200817	0.00553245
175.8	0.155904	0.0917539	0.046622	0.0209117	0.00501248
176	0.155352	0.0916271	0.046264	0.0209367	0.0045434
176.2	0.15527	0.0915154	0.046666	0.0207598	0.00487877
176.4	0.154598	0.0910145	0.046509	0.020802	0.00512912
176.6	0.154372	0.0903881	0.046418	0.0207413	0.00561591
176.8	0.154943	0.0904877	0.046236	0.020605	0.00596045
177	0.154793	0.0899197	0.046064	0.0200256	0.00592852
177.2	0.154372	0.0898404	0.046033	0.0201482	0.00633921
177.4	0.154451	0.0897823	0.045889	0.0205982	0.00559182
177.6	0.15419	0.0896674	0.045422	0.0202559	0.00495635
177.8	0.153997	0.0891645	0.045885	0.0200689	0.00529436
178	0.154625	0.0889621	0.045835	0.0198656	0.00426781
178.2	0.154301	0.0892057	0.045608	0.0196417	0.00388883
178.4	0.153718	0.0890659	0.045302	0.0194658	0.00357684
178.6	0.153798	0.0893099	0.045652	0.0198598	0.00375615
178.8	0.153544	0.0892601	0.046043	0.019502	0.0034756
179	0.153386	0.0894315	0.046386	0.0195227	0.0032359
179.2	0.15309	0.0895422	0.047214	0.019264	0.00369736
179.4	0.153158	0.0897444	0.047095	0.0191682	0.00391359
179.6	0.152567	0.0899585	0.047112	0.0196339	0.00412134
179.8	0.152233	0.0901259	0.047701	0.0204523	0.00419815
180	0.152445	0.0904363	0.047499	0.0201905	0.00412708
180.2	0.152665	0.0906096	0.047481	0.0203395	0.00445846
180.4	0.15192	0.0909353	0.046664	0.0201304	0.0043519
180.6	0.152105	0.0905675	0.046258	0.0200623	0.00472257
180.8	0.152578	0.0908906	0.046694	0.0199865	0.00515548
181	0.152879	0.0906293	0.046625	0.0203393	0.00545344
181.2	0.153121	0.0906147	0.046187	0.0206685	0.00519169
181.4	0.15323	0.0903707	0.045288	0.0204618	0.00469446
181.6	0.152887	0.0897629	0.04486	0.0206787	0.00458523
181.8	0.152876	0.0897093	0.044801	0.0212109	0.00461569
182	0.152951	0.0898334	0.044317	0.0213746	0.00414781
182.2	0.152013	0.0899096	0.043924	0.0216327	0.0040719
182.4	0.15157	0.089558	0.043599	0.0219131	0.00373332
182.6	0.152285	0.0890907	0.043534	0.0218164	0.00340167
182.8	0.152355	0.0884677	0.043799	0.0213561	0.00368619
183	0.151477	0.0885364	0.043998	0.0208216	0.00426597
183.2	0.151243	0.0884785	0.043873	0.020401	0.0048333
183.4	0.150985	0.0875971	0.043563	0.0203089	0.00531385
183.6	0.151099	0.0878563	0.044188	0.0199094	0.00550939
183.8	0.151232	0.0874371	0.044499	0.0199567	0.00564677
184	0.151702	0.0871688	0.044616	0.0196855	0.00594823
184.2	0.151426	0.0876952	0.044439	0.019418	0.00608693
184.4	0.15083	0.0876812	0.044286	0.0188785	0.00629655
184.6	0.150961	0.0878023	0.044517	0.0189366	0.0063961
184.8	0.151169	0.0881705	0.045146	0.0191863	0.00622003
185	0.15093	0.0880784	0.045019	0.0189987	0.00583721
185.2	0.151184	0.0882083	0.0448	0.0189394	0.00583151
185.4	0.150864	0.0886416	0.044942	0.0197979	0.00612489
185.6	0.150726	0.0886553	0.045328	0.0200181	0.00575495
185.8	0.150728	0.0892558	0.045172	0.0200629	0.00548386
186	0.150795	0.0897037	0.044926	0.0200148	0.00491773
186.2	0.150155	0.0892642	0.044872	0.0203896	0.00433707
186.4	0.150234	0.0891818	0.044882	0.0202327	0.00316471
186.6	0.150449	0.0890325	0.044428	0.0197722	0.00249262
186.8	0.149593	0.0886117	0.044401	0.0195252	0.00252889
187	0.14855	0.089074	0.044746	0.0193109	0.00230064
187.2	0.148369	0.0888469	0.044704	0.0192379	0.00217045
187.4	0.148674	0.0877706	0.044644	0.0190887	0.00202548
187.6	0.149354	0.0875857	0.045035	0.0188518	0.00237568
187.8	0.149706	0.0871389	0.0448	0.0189437	0.00352665
188	0.149486	0.0870388	0.044938	0.0187552	0.0034316
188.2	0.149697	0.0876552	0.044695	0.0179325	0.00391149
188.4	0.149882	0.0877686	0.044608	0.0181068	0.00426738
188.6	0.150034	0.088451	0.044974	0.0184873	0.00487858
188.8	0.150124	0.0881738	0.045584	0.0186896	0.00511245
189	0.150242	0.0883464	0.045887	0.0188587	0.00534049
189.2	0.150121	0.0879426	0.045898	0.0192545	0.00616038
189.4	0.150433	0.0877258	0.046224	0.0193544	0.00596701
189.6	0.15076	0.0876343	0.046334	0.0187934	0.00592999
189.8	0.150997	0.0880644	0.046049	0.0194714	0.00578345
190	0.151148	0.0872465	0.04613	0.0195429	0.00527634
190.2	0.151015	0.0866425	0.045976	0.0197012	0.00527067
190.4	0.15052	0.0863922	0.04578	0.0198765	0.00452171
190.6	0.149965	0.0863833	0.045465	0.0198536	0.00472942
190.8	0.149299	0.086153	0.045782	0.0198984	0.00438215
191	0.149045	0.0860659	0.04568	0.0200929	0.00443749
191.2	0.148918	0.0853219	0.045081	0.0201722	0.00492462
191.4	0.149375	0.0851823	0.044628	0.0202074	0.00488279
191.6	0.149189	0.0856542	0.044721	0.0196749	0.00553491
191.8	0.148676	0.0864817	0.044626	0.0193911	0.00551028
192	0.148298	0.0869786	0.044904	0.019073	0.00519449
192.2	0.148743	0.0875609	0.044417	0.0183543	0.00588015
192.4	0.148472	0.0884662	0.044383	0.0189299	0.00554949
192.6	0.14821	0.0886536	0.044803	0.019055	0.00525536
192.8	0.148402	0.0887151	0.044833	0.0195687	0.00493451
193	0.14818	0.0886726	0.044607	0.0197359	0.00497605
193.2	0.148102	0.0881295	0.044517	0.0197699	0.00527629
193.4	0.149036	0.0888101	0.045331	0.019442	0.00499133
193.6	0.149515	0.0888187	0.044718	0.0192015	0.00491636
193.8	0.149444	0.0883129	0.044852	0.0194704	0.00536618
194	0.149809	0.0874635	0.044859	0.0187989	0.00536565
194.2	0.149383	0.0877387	0.044262	0.0182078	0.00610022
194.4	0.149223	0.0875118	0.043989	0.0183741	0.00573903
194.6	0.149107	0.0869685	0.044166	0.0178981	0.00601188
194.8	0.148835	0.0861304	0.044125	0.0175771	0.00590258
195	0.148634	0.0856634	0.043582	0.0174816	0.00598398
195.2	0.148124	0.0854048	0.043552	0.0173144	0.00645858
195.4	0.147462	0.0859546	0.043376	0.0168008	0.00616968
195.6	0.146658	0.0863661	0.043319	0.0160048	0.00636384
195.8	0.146308	0.0865589	0.043404	0.0157174	0.00676923
196	0.146435	0.0867764	0.043063	0.0162591	0.00673103
196.2	0.146266	0.0870408	0.042381	0.0165762	0.00649343
196.4	0.146045	0.0875545	0.04246	0.017171	0.00638815
196.6	0.146074	0.0877888	0.042526	0.0177097	0.00632939
196.8	0.14597	0.088131	0.041813	0.0184219	0.00625561
197	0.145171	0.0882711	0.041632	0.018699	0.00655343
197.2	0.145488	0.0887155	0.041583	0.0187181	0.00622351
197.4	0.145269	0.0886638	0.04128	0.0181393	0.00623153
197.6	0.145124	0.088072	0.040891	0.0181571	0.00628748
197.8	0.144161	0.0875325	0.04152	0.0185169	0.00630796
198	0.143907	0.0872931	0.041036	0.0182521	0.00594408
198.2	0.143721	0.0868767	0.040962	0.0182642	0.00571856
198.4	0.14381	0.0859736	0.041429	0.0187231	0.00548059
198.6	0.143384	0.0853293	0.041669	0.0187113	0.00512881
198.8	0.143024	0.0849077	0.041714	0.0186366	0.00457132
199	0.142887	0.0850163	0.041788	0.018169	0.00389809
199.2	0.143007	0.0848985	0.041752	0.0178554	0.00349815
199.4	0.14265	0.0851432	0.042008	0.0173745	0.00323305
199.6	0.142915	0.0850838	0.042652	0.0169834	0.00302938
199.8	0.143551	0.085021	0.043294	0.0168281	0.0032966
200	0.143517	0.0853773	0.043379	0.0171914	0.0025257
200.2	0.144078	0.0855022	0.043995	0.0172133	0.00255993
200.4	0.144109	0.0854477	0.044101	0.0172664	0.00268708
200.6	0.14436	0.0852301	0.044125	0.0178137	0.00260241
200.8	0.144948	0.0851386	0.043764	0.0179778	0.00233422
201	0.14491	0.0855172	0.044177	0.018316	0.00282095
201.2	0.1449	0.0856815	0.043796	0.018187	0.00277786
201.4	0.144486	0.085065	0.044018	0.01821	0.00372687
201.6	0.144569	0.0854386	0.04478	0.0183499	0.00373979
201.8	0.144197	0.0849146	0.044832	0.0186794	0.0042291
202	0.144188	0.0856706	0.044555	0.0188042	0.0051148
202.2	0.144212	0.0855237	0.044514	0.0192131	0.00534959
202.4	0.143555	0.0856918	0.04423	0.0191152	0.00621699
202.6	0.143332	0.0855253	0.044028	0.0187558	0.00624327
202.8	0.143064	0.0857044	0.044178	0.0186135	0.00617662
203	0.142947	0.0863389	0.043931	0.0182679	0.00600328
203.2	0.143061	0.0864455	0.043407	0.0179588	0.0058449
203.4	0.142499	0.0864411	0.043498	0.0175471	0.00620908
203.6	0.142557	0.0860865	0.043522	0.0170621	0.00613625
203.8	0.142218	0.0858937	0.04356	0.0170245	0.00604501
204	0.141905	0.0860681	0.043284	0.0168247	0.00583415
204.2	0.142125	0.0852805	0.043498	0.0171661	0.0049756
204.4	0.14175	0.0849462	0.04308	0.0171354	0.00416481
204.6	0.141912	0.0846933	0.043006	0.0169159	0.00358813
204.8	0.142127	0.0849812	0.043405	0.016656	0.00275459
205	0.141909	0.0851091	0.043286	0.0171723	0.00309981
205.2	0.1416	0.0850835	0.042972	0.0169398	0.00310521
205.4	0.142074	0.0847429	0.042826	0.0165872	0.0032698
205.6	0.142384	0.0844714	0.043099	0.0164955	0.00312539
205.8	0.142324	0.084634	0.042555	0.0167603	0.00376846
206	0.142486	0.0850594	0.042239	0.0166777	0.00401117
206.2	0.14244	0.0845695	0.042072	0.0172114	0.00364666
206.4	0.142187	0.0844535	0.041683	0.01748	0.00382783
206.6	0.141816	0.0837672	0.041331	0.0179759	0.00429937
206.8	0.141765	0.0844064	0.041077	0.0185906	0.00416719
207	0.141689	0.0848413	0.040548	0.0183463	0.00418202
207.2	0.141619	0.0845095	0.040217	0.0181376	0.00429024
207.4	0.141522	0.0844328	0.040856	0.018783	0.00432477
207.6	0.141288	0.0843183	0.040962	0.0188399	0.00406694
207.8	0.140696	0.0846367	0.040928	0.019235	0.00425007
208	0.14077	0.0853507	0.040952	0.0189546	0.00430652
208.2	0.140538	0.0848841	0.041543	0.018628	0.00351693
208.4	0.14054	0.0855891	0.041361	0.0188937	0.0036802
208.6	0.140209	0.0858314	0.041817	0.0190694	0.00351556
208.8	0.140054	0.0859935	0.041862	0.0191018	0.00380203
209	0.140394	0.086385	0.041224	0.0194905	0.00433295
209.2	0.140253	0.0869635	0.041388	0.0189293	0.00454795
209.4	0.141163	0.087155	0.041582	0.0190111	0.00438497
209.6	0.141196	0.0874725	0.042277	0.0194406	0.0049469
209.8	0.141444	0.0878264	0.041444	0.0193097	0.00479607
210	0.141572	0.0874345	0.041349	0.0200711	0.00470743
210.2	0.141841	0.0870911	0.04099	0.0209254	0.00474646
210.4	0.142202	0.0864234	0.040925	0.0209006	0.00492535
210.6	0.141866	0.0862197	0.040747	0.0204045	0.0052344
210.8	0.142093	0.0864078	0.040373	0.0204161	0.00483531
211	0.14139	0.086059	0.040097	0.0200885	0.0050376
211.2	0.14118	0.0852815	0.040386	0.020015	0.00524431
211.4	0.141164	0.0850497	0.040597	0.0199975	0.00521913
211.6	0.1409	0.0845607	0.039911	0.0194958	0.00455783
211.8	0.140704	0.0845959	0.039619	0.0191018	0.00508159
212	0.141213	0.0841012	0.039587	0.018402	0.00493808
212.2	0.14107	0.0837309	0.039092	0.0184521	0.00498751
212.4	0.141199	0.0837879	0.039296	0.0189675	0.00494014
212.6	0.141064	0.0837745	0.039719	0.0185263	0.00487106
212.8	0.141145	0.0834801	0.039386	0.018329	0.00539756
213	0.141456	0.0836676	0.039724	0.0181459	0.00537194
213.2	0.141211	0.0837445	0.040524	0.0180391	0.00590564
213.4	0.141835	0.0837553	0.041067	0.0187374	0.00627606
213.6	0.141725	0.0833631	0.041565	0.0185378	0.00648645
213.8	0.142129	0.0829237	0.041764	0.0183597	0.00639585
214	0.142402	0.0825741	0.042605	0.018777	0.00639008
214.2	0.14229	0.0825031	0.042953	0.018156	0.00664464
214.4	0.14214	0.0827043	0.043001	0.0176084	0.00658016
214.6	0.141238	0.0827897	0.042145	0.0174589	0.00644816
214.8	0.141097	0.0828966	0.041808	0.0175874	0.00602964
215	0.140006	0.0827267	0.042248	0.0176926	0.00570968
215.2	0.139856	0.0826864	0.04219	0.0177412	0.00495758
215.4	0.139513	0.0826183	0.04205	0.0178219	0.00369935
215.6	0.139412	0.0821002	0.041866	0.0181917	0.0026966
215.8	0.139398	0.0822833	0.041601	0.0180507	0.00277086
216	0.139391	0.0818751	0.040791	0.0184931	0.00272083
216.2	0.138669	0.0826099	0.041072	0.0186336	0.0026809
216.4	0.138451	0.0827216	0.041672	0.0186047	0.00272833
216.6	0.138639	0.0828278	0.041267	0.0180706	0.0027149
216.8	0.138418	0.0828906	0.040891	0.0177183	0.00282161
217	0.137839	0.0830666	0.040985	0.0172608	0.00262763
217.2	0.137656	0.0834853	0.040844	0.0170764	0.00295241
217.4	0.138291	0.0838673	0.040688	0.0166693	0.00317807
217.6	0.138287	0.0837239	0.040612	0.0154772	0.0032969
217.8	0.138162	0.0837818	0.040749	0.0151656	0.00374633
218	0.137854	0.0839224	0.040512	0.0149094	0.00379531
218.2	0.137508	0.0842277	0.040218	0.0146497	0.00435759
218.4	0.137721	0.0843327	0.03982	0.0147648	0.00441524
218.6	0.137584	0.0841623	0.039676	0.0149	0.0042301
218.8	0.137733	0.0842941	0.040081	0.0151037	0.00406433
219	0.137556	0.0839314	0.040223	0.0159686	0.00404628
219.2	0.137925	0.0837299	0.040167	0.0164004	0.00416274
219.4	0.138357	0.0833557	0.040544	0.0170281	0.00431402
219.6	0.138775	0.0829525	0.040445	0.0176669	0.0046959
219.8	0.138869	0.0830497	0.040343	0.0181748	0.00510768
