# Supplementary material for: Discovery of a heparan sulfate binding domain in monkeypox virus H3 as an anti-poxviral drug target combining AI and MD simulations
Source: eLife. 2025 Jan 16;13:RP100545. doi: 10.7554/eLife.100545 (PMC11737874; doi:10.7554/eLife.100545)
Supplement: Figure 5—source data 3. [file elife-100545-fig5-data3.xlsx]

## Sheet: Sheet1
Conc. (mM)	602		614		723		761
100	-18.13	-8.7	-8.06	-4.84	68.42	56.52	-16.49	-23.46
33.3333	-23.05	-0.49	-12.9	5.65	7.3	-10.34	0.33	-24.28
11.1111	-16.49	0.33	-19.76	-13.71	-6.64	-14.44	-12.39	-16.49
3.7037	-15.26	-10.34	-16.94	-3.63	3.61	-21	11.81	-18.54
1.23457	-17.72	1.97	-7.66	5.65	-3.36	-16.49	14.68	-7.47
0.41152	-11.16	5.25	-10.48	-1.21	-4.18	-10.34	9.76	-27.56
