# Supplementary material for: Discovery of a heparan sulfate binding domain in monkeypox virus H3 as an anti-poxviral drug target combining AI and MD simulations
Source: eLife. 2025 Jan 16;13:RP100545. doi: 10.7554/eLife.100545 (PMC11737874; doi:10.7554/eLife.100545)
Supplement: Figure 5—source data 4. [file elife-100545-fig5-data4.xlsx]

## Sheet: Sheet1
PBS	723
180500	23500
124000	56500
102000	38000
44500	44500
97000	57000
