# Supplementary material for: Discovery of a heparan sulfate binding domain in monkeypox virus H3 as an anti-poxviral drug target combining AI and MD simulations
Source: eLife. 2025 Jan 16;13:RP100545. doi: 10.7554/eLife.100545 (PMC11737874; doi:10.7554/eLife.100545)
Supplement: Figure 5—source data 5. [file elife-100545-fig5-data5.xlsx]

## Sheet: Sheet1
PBS	723
696873	79345
490862	208498
252027	133236
128408	152331
510203	187456
